# Supplementary material for: A systematic review of evidence on the links between patient experience and clinical safety and effectiveness
Source: PubMed Central journal article supplement — BMJ Open. 2013 Jan 3;3(1):e001570. doi: 10.1136/bmjopen-2012-001570 (PMC3549241; doi:10.1136/bmjopen-2012-001570), 2013-01-03
Supplement: bmjopen-2012-001570.draft_revisions.pdf [file bmjopen-2012-001570.draft_revisions.pdf]

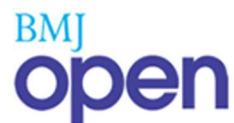

**A review of evidence on the links between patient experience and clinical safety and effectiveness**

|                                    |                                                                                                                                                                                                                                               |
|------------------------------------|-----------------------------------------------------------------------------------------------------------------------------------------------------------------------------------------------------------------------------------------------|
| Journal:                           | <i>BMJ Open</i>                                                                                                                                                                                                                               |
| Manuscript ID:                     | bmjopen-2012-001570                                                                                                                                                                                                                           |
| Article Type:                      | Research                                                                                                                                                                                                                                      |
| Date Submitted by the Author:      | 18-Jun-2012                                                                                                                                                                                                                                   |
| Complete List of Authors:          | Doyle, Cathal; NIHR CLAHRC for NWL, Medicine<br>Lennox, Laura; CLAHRC for NWL, Medicine<br>Bell, Derek; NIHR CLAHRC for NWL, Medicine; Imperial College, Acute<br>Medicine                                                                    |
| <b>Primary Subject<br>Heading</b>: | Patient-centred medicine                                                                                                                                                                                                                      |
| Secondary Subject Heading:         | Health services research                                                                                                                                                                                                                      |
| Keywords:                          | Health & safety < HEALTH SERVICES ADMINISTRATION & MANAGEMENT,<br>Quality in health care < HEALTH SERVICES ADMINISTRATION &<br>MANAGEMENT, Health policy < HEALTH SERVICES ADMINISTRATION &<br>MANAGEMENT, patient experience, Patient safety |
|                                    |                                                                                                                                                                                                                                               |

SCHOLARONE™  
Manuscripts

|                             |                                                                                                                                                                                                                                                                                                                                                                                                                                                                                                                                                                                                                                                                          |
|-----------------------------|--------------------------------------------------------------------------------------------------------------------------------------------------------------------------------------------------------------------------------------------------------------------------------------------------------------------------------------------------------------------------------------------------------------------------------------------------------------------------------------------------------------------------------------------------------------------------------------------------------------------------------------------------------------------------|
| <b>Title</b>                | A review of evidence on the links between patient experience and clinical safety and effectiveness                                                                                                                                                                                                                                                                                                                                                                                                                                                                                                                                                                       |
| <b>Authors</b>              | <p>Cathal Doyle- Program Lead for Evaluation, NIHR CLAHRC for North West<sup>1</sup><br/> Laura Lennox- Research Assistant, NIHR CLAHRC for North West London<sup>1</sup><br/> and Imperial College London<sup>2</sup><br/> Derek Bell- Professor of Acute Medicine, NIHR CLAHRC for North West London<sup>1</sup> and Imperial College London<sup>2</sup></p> <p><sup>1,2</sup> Chelsea and Westminster Hospital, 369 Fulham Road, London, SW10 9NH, UK</p>                                                                                                                                                                                                             |
| <b>Corresponding Author</b> | <p>Name: Cathal Doyle<br/> Address: CLAHRC NWL, Floor 4 Lift Bank D, Chelsea &amp; Westminster Hospital, 369 Fulham Road, London, SW10 9NH, UK<br/> Email: c.doyle@imperial.ac.uk<br/> Telephone (office): 0203 315 3392</p> <p>"The Corresponding Author has the right to grant on behalf of all authors and does grant on behalf of all authors, an exclusive licence (or non exclusive for government employees) on a worldwide basis to the BMJ Publishing Group Ltd to permit this article (if accepted) to be published in BMJ editions and any other BMJ PGL products and sublicences such use and exploit all subsidiary rights, as set out in our licence."</p> |
| <b>Keywords:</b>            | Health & safety, Quality in healthcare, Health policy, Patient experience, Patient safety                                                                                                                                                                                                                                                                                                                                                                                                                                                                                                                                                                                |
| <b>Word Count</b>           | 1853                                                                                                                                                                                                                                                                                                                                                                                                                                                                                                                                                                                                                                                                     |

## Abstract

Objective: To explore evidence on the links between patient experience and clinical safety and effectiveness outcomes.

Design: Systematic review

Setting: A wide range of settings within primary and secondary care including hospitals and primary care centres.

Participants: A wide range of demographic groups and age groups.

Primary and secondary outcome measures: A broad range of safety and effectiveness outcomes including mortality, physical symptoms, length of stay and adherence to treatment.

Results: 55 articles met the inclusion criteria for this review. The evidence indicates consistent associations between patient experience, safety and effectiveness for a wide range of disease areas, settings, outcome measures and study designs. Evidence demonstrates associations between patient experience and adherence to medication and treatments; use of screening services; patient symptoms; hospitalization and length of stay; number of doctor visits; and immunizations. There is some evidence of associations between patient experience and blood pressure, pain and mortality.

Conclusion: The data presented shows associations between patient experience and clinical effectiveness and safety and supports the case for the inclusion of patient experience as one of the three pillars of quality. It suggests that improvement of patient experience will increase the likelihood of improvements in the other two domains. It supports the argument that the three measures should be looked at as a group and not in isolation. Clinicians should resist sidelining patient experience measures as too subjective or mood-orientated, divorced from the 'real' clinical work of measuring safety and effectiveness.

Trial registration: This review was not registered.

## Introduction

Patient experience is increasingly recognized as one of three pillars of quality in healthcare alongside safety and clinical effectiveness.<sup>1</sup> In the NHS the measurement of patient experience data to identify strengths and weaknesses of health care delivery, drive quality improvement, inform commissioning and promote patient choice is now mandatory.<sup>2 3 4</sup> In addition to data on harm avoidance or success rates for treatments, providers are now assessed on aspects of care such as dignity and respect, compassion and involvement in care decisions.<sup>4</sup> In England these data are published in Quality Accounts and the Commissioning for Quality & Innovation (CQUINs) payment framework makes a proportion of care providers' income conditional on improvement in this domain.<sup>5</sup>

The inclusion of patient experience as a pillar of quality is often justified on the grounds of its intrinsic value – that the expectation of humane, empathic care is a given and requires no further justification.

It is also justified on more utilitarian grounds as a means of improving safety and effectiveness.<sup>6</sup> There are a number of aspects of care relevant to patient experience seen as relevant to health and safety outcomes.<sup>7</sup> For example, effective clinician-patient communication, through empathic, two-way communication with patients, respect for their beliefs and concerns and the conveyance of clear information will promote patient trust. This could benefit safety and effectiveness by promoting higher quality information exchange for both clinicians and patients creating an environment where patients may be more willing to disclose information. It can lead to greater patient engagement or 'ownership' of clinical decisions, with patients entering a 'therapeutic alliance' with clinicians. This could then support improved and more timely diagnosis, clinical decisions and advice and lead to potentially fewer unnecessary referrals or diagnostic tests.<sup>8 9</sup> Increased patient agency can encourage greater participation in personal care, increasing safety and effectiveness through compliance with medication, adherence to recommended treatment, monitoring of prescriptions and dose.<sup>10 9</sup> Patients can be informed about what to expect from treatment and motivated to report adverse events or complications and keep a list of their medical histories, allergies, and current medications.<sup>11</sup>

Patients' direct experience of care process directly through clinical encounters or as an observer (for example, as a patient on a hospital ward) can provide valuable insights into everyday care. Examples include attention to pain control, assistance with bathing or help with feeding, or the environment (cleanliness, noise, physical safety) or coordination of care between professions or organizations. Given the organizational fragmentation of much healthcare care and the numerous services with which many patients interact, the measurement of patient experience may provide a 'whole system' perspective not readily available from more discrete safety and effectiveness measures.<sup>11</sup>

Focusing on such utilitarian arguments, this study reviews evidence on links that have been demonstrated between patient experience and safety and effectiveness.

## Methods

Two search methods were used to identify the evidence. The first was a search of a literature database (EMBASE) using predetermined search terms.

Patient experience is a term that encapsulates a number of dimensions and in preliminary database searches this phrase on its own uncovered a limited amount of studies.

To broaden and structure the search for evidence, identify search terms and provide a framework for analysis it was necessary to identify what patient experience entails and outline potential pathways through which it is proposed to impact on safety and effectiveness.

As such, we combined common elements from patient experience frameworks (The Institute of Medicine<sup>1</sup>, Picker Institute<sup>12</sup> and NICE<sup>13</sup>), Table 1 delineates different dimensions of patient experience and distinguishes between 'relational' and 'functional' aspects.

Relational aspects refer to interpersonal aspects of care – the ability of clinicians to empathise, respect the preferences of patients, include them in decision making and provide information to enable self-care.<sup>10</sup> Patients expect professionals to put their interest above other considerations and be honest and transparent when something goes wrong.<sup>8 14</sup> Functional aspects relate to basic expectations about how care is delivered, such as attention to physical needs, timeliness of care, clean and safe environments and effective coordination between professionals.

**Table 1: Identifying aspects of patient experience and search terms**

| Relational aspects                                                                                                                                                                                 | Functional aspects                                                                                      |
|----------------------------------------------------------------------------------------------------------------------------------------------------------------------------------------------------|---------------------------------------------------------------------------------------------------------|
| Emotional and psychological support, relieving fear and anxiety, treated with respect, kindness, dignity, compassion, understanding                                                                | Effective treatment delivered by trusted professionals                                                  |
| Participation of patient in decisions and respect and understanding for beliefs, values, concerns, preferences and their understanding of their condition                                          | Timely, tailored and expert management of physical symptoms                                             |
| Involvement of, and support for family and carers in decisions                                                                                                                                     | Attention to physical support needs and environmental needs (e.g. clean, safe, comfortable environment) |
| Clear, comprehensible information and communication tailored to patient needs to support informed decision (awareness of available options, risks and benefits of treatments) and enable self-care | Coordination and continuity of care; smooth transitions from one setting to another                     |
| Transparency, honesty, disclosure when something goes wrong                                                                                                                                        |                                                                                                         |

1  
2  
3 Table 2 lists search terms of relevance to patient experience derived from Table 1 and from  
4 discursive documents in this area of research.<sup>10 15 16 9</sup>  
5  
6  
7

8 **Table 2: Search terms denoting patient experience:**

9 patient-centred care; engagement; communication; clinical interaction; patient-  
10 clinician; clinician-patient; patient-doctor; doctor-patient; physician-patient; patient-  
11 physician; patient-provider; interpersonal treatment; physician discussion; trust (in  
12 physician); patient trust; safety; empathy; compassion; respect; responsiveness;  
13 preferences; understanding; shared decision making; participation in decisions; decision  
14 making; autonomy; caring; kindness; dignity; honesty; participation; right to decide;  
15 integration; trust; time; information; physical comfort; involvement (of family, carers,  
16 friends); emotional support; continuity (of care); smooth transition; emotional  
17 support; comfort; coordination;  
18  
19  
20  
21  
22

23 The search of EMBASE using these terms identified 38,294 studies. These were combined with  
24 search terms denoting patient safety and effectiveness outcomes obtained from the discursive  
25 literature such as 'adherence', 'compliance', 'adverse events' and so on. Some of the searches  
26 using these broad terms identified studies returned study numbers far larger than could be  
27 analyzed given time constraints so search terms were made more specific (for example,  
28 'adherence to treatment', 'compliance with medicine'.  
29

30  
31 To manage the scope of this time-limited review, our inclusion criteria focused on studies that  
32 measured direct relationships between patients' reporting of their experience and safety and  
33 effectiveness outcomes. These included studies measuring associations between experience  
34 and outcomes at a patient level (i.e data on both types of variables for the same patients) and  
35 associations between aggregated patient measures of experience and outcomes for the same  
36 type of organisation such as a hospital or primary care practice. We excluded studies of  
37 interventions to improve aspects of relevance to patient experience, although we refer to some  
38 of this evidence in the discussion. We prioritized meta-analyses and systematic reviews where  
39 available, and used them to summarize evidence in a particular area.  
40  
41

42 The protocol-driven search identified 5323 papers whose abstracts were then reviewed. If  
43 deemed relevant the full article was retrieved to assess whether it met the inclusion criteria.  
44

45  
46 Given concerns about the sole use of protocol-driven search strategies for complex evidence<sup>17</sup>  
47 we applied a second search method using a 'snowballing' approach, starting with references  
48 identified in discursive documents<sup>10 15 16</sup> and pursuing references of references, citations and  
49 'related articles' functions in PubMed.  
50  
51

52  
53 **Results**

54 38 articles meeting the inclusion criteria were identified using the protocol-driven approach and  
55 13 using the snowballing approach, with 4 studies common to both. A total of 55 studies met  
56 the inclusion criteria.  
57  
58  
59  
60

Table 2 presents evidence in order of patient experience focus, distinguishing between those articles with a broad focus (looking at both 'relational and functional' aspects outlined in Figure 1) and those focusing on a single aspect. Within these categories, studies are then presented in order of breadth of disease focus and then by study design (with systematic reviews presented first).

Overall, the evidence indicates associations between patient experience, safety and effectiveness that appear consistent across a range of disease areas, study designs, settings, population groups and outcome measures.

Chart 1 outlines the disease areas covered.

Chart 1:

Table 3 outlines the range of outcome measures where associations with patient experience and outcomes related to safety and effectiveness were demonstrated.

**Table 3: Outcomes related to safety and effectiveness demonstrated**

| Category                         | Associations demonstrated                                                         | Count |
|----------------------------------|-----------------------------------------------------------------------------------|-------|
| Adherence                        | Adherence to/compliance with medications and recommended treatment                | 16    |
| Screening                        | Cancer screening, Cholesterol screening                                           | 8     |
| Symptoms                         | Symptom burden, discomfort & concern                                              | 7     |
| Hospitalization & Length of Stay | Hospitalization, length of stay                                                   | 6     |
| Doctor visits                    | Doctor visits, Well-child visits, Preventive visits, Prenatal visits              | 6     |
| Immunization                     | Use and timeliness of Immunization services - MMR vaccination, influenza          | 5     |
| Diabetes care                    | Diabetes self-management and adherence to recommended care, blood glucose control | 5     |
| Self reported health             | Self reported health and well-being                                               | 4     |

|                 |                                                         |   |
|-----------------|---------------------------------------------------------|---|
| Function        | Functional status, physical function, physical mobility | 4 |
| Blood pressure  | Blood pressure control, Hypertension control            | 3 |
| Pain            | Pain levels                                             | 2 |
| Patient ability | Patient ability to deal with dyspnea, angina            | 2 |
| Mortality       | Inpatient mortality, mortality                          | 2 |

As shown in detail in Table 4 and synopsised in Table 3, this review found numerous studies showing associations between patients' rating of their experience and adherence to medical treatment and advice, compliance with medication, symptom resolution and self-rated health. There is consistent evidence of better use of preventive services such as cancer screening and immunization. Some studies show an association with physical health outcome measures including blood pressure, blood glucose and mortality.

There is also evidence showing associations between patients' perspective or observations of processes of care and the technical quality and safety of care for the same population group recorded through other means. For example, two large-scale studies of hospitals in the US found patient experience measures associated with technical quality of care for myocardial infarction, congestive heart failure, pneumonia and complications from surgery.<sup>18 19</sup> A similar study in primary care found associations between patient experience and processes of care related to prevention and disease management.<sup>20</sup> Other studies comparing interviews with patients on their experience of individual adverse events with the official reporting of these same events by staff, found underreporting by healthcare providers.<sup>14 21 22</sup>

Table 3 and 4 focus on studies where associations with safety and effectiveness were demonstrated. Not all studies demonstrated associations, but those showing associations between patient experience and the other two domains of quality outweigh those that don't.

### Discussion

This reviews shows evidence of associations between patient experience, safety and effectiveness that appear consistent across a range of disease areas, study designs, settings, population groups and outcome measures.

This builds on other studies<sup>9 10 15 16</sup> demonstrating links between these three domains. This study also demonstrates an approach to designing a systematic search for evidence for the 'catch-all' term patient experience, bringing together evidence from a variety of sources that may otherwise remain dispersed. This approach can be used or adapted for further research in this area.

This was a time-limited review and there is scope to expand this search based on our results. There may be scope to broaden the search terms and this may uncover further evidence. The



1  
2  
3 first search was confined to one database and the review focused primarily on peer-reviewed  
4 literature excluding gray literature. The suggested association between measures of patient  
5 experience and safety and effectiveness described does not entail causality. As always, there  
6 may be a publication bias in favour of studies showing positive associations between patient  
7 experience variables and safety and effectiveness outcomes<sup>23</sup> In addition, most studies were  
8 conducted in the United States and caution is needed about their applicability to other  
9 healthcare systems.  
10  
11

12 However, the consistent associations between patient experience, safety and effectiveness for a  
13 wide range of disease areas, settings, outcome measures and study designs suggest that patient  
14 experience is clinically important.  
15  
16

17 This is supported by further published evidence about interventions to improve aspects of  
18 patient experience that did not meet our inclusion criteria. A review of interventions to increase  
19 adherence to medication showed communication of information, good provider-patient  
20 relationships and patients' agreement with the need for treatment as common determinants of  
21 effectiveness.<sup>24</sup> Research on 'decision aids' to ensure patients are well informed about their  
22 treatments and that decisions reflect the preferences of patients indicate that patient  
23 engagement has a beneficial impact on outcomes. For example, awareness of the risks of  
24 surgical procedures resulted in a 23% reduction in surgical interventions and better functional  
25 status.<sup>25</sup> Another review showed that provision of good information and emotional support are  
26 associated with better recovery from surgery and heart attacks.<sup>26</sup> A systematic review of these  
27 interventions to improve patient experience would complement evidence identified in this  
28 review.  
29  
30  
31

32 The data presented supports the view that patient experience data, robustly collected and  
33 analysed, may highlight strengths and risks in effectiveness and safety and that focusing on  
34 improving patient experience will increase the likelihood of improvements in the other two  
35 domains. There are aspects of patient experience that will help to explain performance in safety  
36 and effectiveness and vice-versa. The moderate strength of associations in many of the studies  
37 also suggests that while experience, safety and effectiveness are linked, they are not  
38 interchangeable.  
39  
40

41 This supports the argument that the three measures should be looked at as a group and not in  
42 isolation. Clinicians should resist sidelining patient experience measures as too subjective or  
43 mood-orientated, divorced from the 'real' clinical work of measuring safety and effectiveness.  
44  
45  
46  
47  
48  
49  
50  
51  
52  
53  
54  
55  
56  
57  
58  
59  
60

1  
2  
3  
4  
5  
6  
7  
8  
9  
10  
11  
12  
13  
14  
15  
16  
17  
18  
19  
20  
21  
22  
23  
24  
25  
26  
27  
28  
29  
30  
31  
32  
33  
34  
35  
36  
37  
38  
39  
40  
41  
42  
43  
44  
45  
46  
47  
48  
49

For peer review only

Table 4: Details of individual studies

| Author                            | Patient experience focus | Disease Focus                                                                                             | Type of Study                                        | Setting                        | Country | Demonstrated safety & Effectiveness outcome                                                                                                                                |
|-----------------------------------|--------------------------|-----------------------------------------------------------------------------------------------------------|------------------------------------------------------|--------------------------------|---------|----------------------------------------------------------------------------------------------------------------------------------------------------------------------------|
| Chang et al. 2006 <sup>27</sup>   | Relational & functional  | 22 clinical conditions                                                                                    | Quantitative Observational cohort study 236 patients | Managed care organisations (2) | US      | Technical quality of care                                                                                                                                                  |
| Blasi et al. 2001 <sup>28</sup>   | Relational & functional  | Asthma, hypertension, cancer, insomnia, menopause, obesity, tonsillitis                                   | Systematic Review 25 studies                         | Range of settings              | Range   | Health status, speed of recovery, pain, adherence to treatment, anxiety,                                                                                                   |
| Sequist et al. 2008 <sup>20</sup> | Relational & functional  | Cervical cancer, breast cancer, colorectal cancer, chlamydia, cardiovascular conditions, asthma, diabetes | Cross-sectional study (492 settings)                 | Primary care                   | US      | Cancer screening, Cholesterol screening & control, Asthma medications, Diabetes testing                                                                                    |
| Burgers et al. 2010 <sup>29</sup> | Relational & functional  | Chronic lung, mental health problems, hypertension, heart disease, diabetes, arthritis, cancer.           | Survey 8973 patients                                 | Range of settings              | Range   | Morbidity score' combining no.of conditions and health status                                                                                                              |
| Drotar 2009 <sup>30</sup>         | Relational & functional  | asthma, cystic fibrosis, diabetes, epilepsy, inflammatory bowel disease, juvenile rheumatoid arthritis    | Systematic review 22 studies                         | Range of settings              | Range   | Treatment adherence, office visits, phone calls, hospitalizations, symptoms, emergency room visits, oral steroid burst rates, symptom days, health-related quality of life |

|                                     |                         |                                                                                                         |                                       |                   |       |                                                                                                                                                                                                                                                                                                                                                                                                                |
|-------------------------------------|-------------------------|---------------------------------------------------------------------------------------------------------|---------------------------------------|-------------------|-------|----------------------------------------------------------------------------------------------------------------------------------------------------------------------------------------------------------------------------------------------------------------------------------------------------------------------------------------------------------------------------------------------------------------|
| Hall et al. 2010 <sup>31</sup>      | Relational & functional | brain injury, musculoskeletal conditions, cardiac conditions, trauma, back pain, neck and shoulder pain | Systematic review 14 studies          | Range of settings | Range | Treatment adherence, therapeutic success, depression, function, global assessment, physical function, floor-bench lifts, activities of daily living                                                                                                                                                                                                                                                            |
| Stevenson et al. 2004 <sup>32</sup> | Relational & functional | Hypertension, Chronic Obstructive Pulmonary Disorder, ovarian cancer, epilepsy, hyperlipidaemia         | Systematic Review 134 studies         | Range of settings | Range | Understanding of treatment, treatment decisions, patients' knowledge of medicines, appointment attendance, number of medicines prescribed                                                                                                                                                                                                                                                                      |
| Saultz & Lochner 2005 <sup>33</sup> | Relational & functional | Varied                                                                                                  | Systematic Review 41 studies          | Range of settings | US    | Influenza immunization, Timeliness of childhood immunizations + rates, Mammogram rates, PAP Test, Breast examinations, Access to preventive and primary care services, Hospitalization rate, ICU days, Hospital length of stay, Readmission, Adherence to diabetes care, Hypertension control, Neonatal morbidity, Apgar score, Birth weight, Prenatal visits, intervention at delivery, Newborn resuscitation |
| Kaplan et al 1989 <sup>34</sup>     | Relational & functional | Ulcer disease, hypertension, diabetes, breast cancer                                                    | Randomised control trial 252 patients | Range of settings | US    | patient and record reported health status, physiologic measures of health                                                                                                                                                                                                                                                                                                                                      |
| Jha et al. 2008 <sup>18</sup>       | Relational & functional | acute myocardial infarction, congestive heart failure, pneumonia complications from surgery.            | Cross-sectional study (2429 settings) | Hospital          | US    | Technical quality of care in AMI, CHF, pneumonia, surgery complications, Ratio of nurses to patient days                                                                                                                                                                                                                                                                                                       |

|                                        |                         |                             |                                                        |                                 |             |                                                                  |
|----------------------------------------|-------------------------|-----------------------------|--------------------------------------------------------|---------------------------------|-------------|------------------------------------------------------------------|
| Rao et al. 2006 <sup>35</sup>          | Relational & functional | Hypertension, Influenza     | Quantitative<br>Cross sectional<br>study 3487 patients | Primary care                    | UK          | Technical quality of care                                        |
| Meterko et al. 2010 <sup>36</sup>      | Relational & functional | Acute myocardial infarction | Quantitative<br>Cohort study 1858 patients             | Veteran Affairs Medical Centres | US          | Survival 1-year post discharge                                   |
| Hall & Roter & Katz 1988 <sup>37</sup> | Relational & functional | Varied                      | Meta-analysis 41 studies                               | Range of settings               | Range       | recall, compliance                                               |
| Vincent et al. 1994 <sup>38</sup>      | Relational & functional | Varied                      | Cohort Survey 227 patients                             | Range of settings               | UK          | legal action                                                     |
| Agoritsas et al 2005 <sup>39</sup>     | Relational & functional | Varied                      | Cohort patient survey 1518 patients                    | Hospital                        | Switzerland | Adverse events                                                   |
| Flocke et al. 1998 <sup>40</sup>       | Relational & functional | Varied                      | cross-sectional study 2889 patients                    | Primary care                    | US          | Screening, health habit counseling, use of immunization services |
| Jackson, J. et al. 2001 <sup>41</sup>  | Relational & functional | Varied                      | Quantitative Cohort study 500 patients                 | Army medical centre             | US          | Symptom outcome                                                  |
| Jackson, C. et al. 2010 <sup>42</sup>  | Relational & functional | Inflammatory bowel disease  | Systematic review 17 studies                           | Range of settings               | Range       | Adherence to treatment                                           |

|                                          |                         |                           |                                        |                   |       |                                                                                                                                          |
|------------------------------------------|-------------------------|---------------------------|----------------------------------------|-------------------|-------|------------------------------------------------------------------------------------------------------------------------------------------|
| Clark et al. 2007 <sup>43</sup>          | Relational & functional | Asthma                    | Randomized control trial 731 patients  | Range of settings | US    | Office visits for asthma, emergency department visits and urgent office visits, hospitalizations, telephone calls to physicians' offices |
| Raiz et al. 1999 <sup>44</sup>           | Relational & functional | Renal transplant          | Quantitative Cohort Study 357 patients | Primary care      | US    | medication compliance                                                                                                                    |
| Kahn et al. 2007 <sup>45</sup>           | Relational & functional | Breast cancer             | Prospective cohort study 881 patients  | Hospitals         | US    | adherence                                                                                                                                |
| Plomondon et al. 2008 <sup>46</sup>      | Relational & functional | Myocardial infarction     | 1815 patients                          | Hospital          | US    | Angina                                                                                                                                   |
| Fuertes et al 2008 <sup>47</sup>         | Relational & functional | Neurology                 | Survey 152 patients                    | hospital          | US    | Medical treatment adherence, self-efficacy                                                                                               |
| Lewis et al 2010 <sup>48</sup>           | Relational & functional | Pain                      | Qualitative cohort study 191 patients  | Primary care      | US    | Medication adherence                                                                                                                     |
| Sans-Corralles et al. 2006 <sup>49</sup> | Relational & functional | Range of conditions       | Systematic review 20 studies           | Primary care      | Spain | Preventive activities, pain, vaccinations, blood pressure, hospital days, intensive care days, length of stay, emergency admissions      |
| Safran et al. 1998 <sup>15</sup>         | Relational & functional | No specific disease focus | Cross-sectional study 7204 patients    | Primary care      | US    | Adherence                                                                                                                                |
| Hsiao & Boulton 2008 <sup>50</sup>       | Relational & functional | No specific disease focus | Literature review 14 studies           | Primary care      | Range | Self-reported health measure                                                                                                             |

|                                                |                                                       |                            |                                                                                                                                                    |                                                              |                               |        |                                                                                                                                                                                                                                      |
|------------------------------------------------|-------------------------------------------------------|----------------------------|----------------------------------------------------------------------------------------------------------------------------------------------------|--------------------------------------------------------------|-------------------------------|--------|--------------------------------------------------------------------------------------------------------------------------------------------------------------------------------------------------------------------------------------|
| 1<br>2<br>3<br>4<br>5                          | Arbuthnott et al<br>2009 <sup>51</sup>                | Relational &<br>functional | No specific disease focus                                                                                                                          | meta-analysis 48<br>studies                                  | Range of<br>settings          | Canada | Adherence                                                                                                                                                                                                                            |
| 6<br>7<br>8<br>9<br>10<br>11<br>12<br>13<br>14 | Stewart 1995 <sup>52</sup>                            | Relational                 | Peptic ulcers, breast<br>cancer, diabetes,<br>hypertension, headache,<br>coronary artery disease,<br>gingivitis, tuberculosis,<br>prostate cancer, | Systematic Review<br>21 studies                              | Range of<br>settings          | Range  | Anxiety level, psychological distress,<br>health and functional status, blood<br>glucose, blood pressure, headache<br>resolution, blood pressure, glycosylated<br>hemoglobin levels, pain levels,<br>depression, symptom resolution, |
| 15<br>16<br>17<br>18<br>19                     | Alamo et al.<br>2002 <sup>53</sup>                    | Relational                 | Benign chronic<br>musculoskeletal pain (CMP),<br>fibromyalgia                                                                                      | Experimental<br>clustered<br>randomized study<br>81 patients | Primary care                  | Spain  | Anxiety, pain, physical mobility,<br>associated symptoms                                                                                                                                                                             |
| 20<br>21<br>22<br>23                           | Fan et al. 2005 <sup>54</sup>                         | Relational                 | Cardiac care, diabetes,<br>COPD                                                                                                                    | Survey<br>21689 patients                                     | Veteran<br>Medical<br>Centres | US     | Patient ability to deal with angina,<br>patient education on diabetes, patient<br>ability to deal with dyspnea                                                                                                                       |
| 24<br>25<br>26<br>27                           | O'Malley et al.<br>2004 <sup>55</sup>                 | Relational                 | Varied                                                                                                                                             | Cross-sectional<br>study 961 patients                        | Primary care                  | US     | trust, patient-provider<br>communication, coordination of care                                                                                                                                                                       |
| 28<br>29<br>30                                 | Little et al.<br>2001 <sup>56</sup>                   | Relational                 | varied                                                                                                                                             | Survey 865<br>patients                                       | Primary care                  | UK     | Enablement, symptom burden                                                                                                                                                                                                           |
| 31<br>32<br>33                                 | Levinson et al.<br>1997 <sup>57</sup>                 | Relational                 | Varied                                                                                                                                             | Qualitative<br>cohort study                                  | Primary care                  | US     | Litigation                                                                                                                                                                                                                           |
| 34<br>35<br>36<br>37                           | Carcaise-<br>Edinboro &<br>Bradley 2008 <sup>58</sup> | Relational                 | Colorectal cancer                                                                                                                                  | Cross sectional<br>study 8488 patients                       | Primary care                  | US     | Colorectal cancer screening                                                                                                                                                                                                          |
| 38<br>39<br>40<br>41                           | Schneider et al.<br>2004 <sup>59</sup>                | Relational                 | HIV                                                                                                                                                | Cross-sectional<br>analysis study 554<br>patients            | Primary care                  | US     | Medication adherence                                                                                                                                                                                                                 |

|                                          |            |                            |                                       |                   |         |                                                                                                                             |
|------------------------------------------|------------|----------------------------|---------------------------------------|-------------------|---------|-----------------------------------------------------------------------------------------------------------------------------|
| Schoenthaler et al. 2008 <sup>60</sup>   | Relational | Hypertension               | Cross-sectional study 439 patients    | Primary care      | US      | Medication adherence                                                                                                        |
| Slatore et al. 2010 <sup>61</sup>        | Relational | COPD                       | Cross sectional study 342 patients    | Range of settings | US      | Breathing problem confidence                                                                                                |
| Lee & Lin 2009 <sup>62</sup>             | Relational | Type 2 diabetes            | Cohort study 480 patients             | Range of settings | Taiwan  | Treatment adherence, clinical outcomes from medical records, self-rated health & wellbeing                                  |
| Heisler et al. 2002 <sup>63</sup>        | Relational | Diabetes                   | Survey 1314 patients                  | primary care      | US      | Diabetes self-management                                                                                                    |
| Lee & Lin <sup>64</sup>                  | Relational | Type 2 diabetes            | Cohort study 614 patients             | Range of settings | Taiwan  | No effect demonstrated                                                                                                      |
| Kennedy A. et al. 2003 <sup>65</sup>     | Relational | Inflammatory bowel Disease | Randomised control trial 700 patients | Hospital          | England | Ability to cope with condition, symptom relapses                                                                            |
| Stewart et al. 2000 <sup>66</sup>        | Relational | General                    | Cohort study 315 patients             | Primary care      | Canada  | Symptom discomfort & concern, Self-reported health (SF36), diagnostic tests, referrals, and visits to the family physician, |
| Zolnieriek & DiMatteo 2009 <sup>67</sup> | Relational | No specific disease focus  | Meta-analysis 127 studies             | Range of settings | Range   | Adherence, physician communication                                                                                          |
| Beck et al 2002 <sup>68</sup>            | Relational | No specific disease focus  | A Systematic Review 22 studies        | Primary care      | Range   | Patient recall, compliance, symptom resolution, health status, quality of life, mortality, anxiety level,                   |



|                                           |                                         |            |                                                                                                       |                                                                     |                      |        |                                                                                                                                                                                   |
|-------------------------------------------|-----------------------------------------|------------|-------------------------------------------------------------------------------------------------------|---------------------------------------------------------------------|----------------------|--------|-----------------------------------------------------------------------------------------------------------------------------------------------------------------------------------|
| 1<br>2<br>3<br>4<br>5<br>6<br>7<br>8<br>9 | Kinnersley et al.<br>1999 <sup>69</sup> | Relational | No specific disease focus                                                                             | Mixed methods<br>observational Study<br>(1 setting) 143<br>patients | Primary care         | UK     | No effect demonstrated                                                                                                                                                            |
| 10<br>11<br>12                            | López et al.<br>2009 <sup>14</sup>      | Relational | No specific disease focus                                                                             | Survey                                                              | Hospital             | US     | Adverse events                                                                                                                                                                    |
| 13<br>14<br>15                            | Cabana & Jee<br>2004 <sup>70</sup>      | Functional | Rheumatoid arthritis,<br>Epilepsy, Breast Cancer,<br>Cervical Cancer, Diabetes                        | Systematic<br>review 18<br>studies                                  | Range of<br>settings | US     | Use of ambulatory care services,<br>screening services, MMR vaccination,<br>Glucose control - diabetes                                                                            |
| 16<br>17<br>18<br>19<br>20<br>21          | Isaac et al.<br>2010 <sup>19</sup>      | Functional | Acute myocardial<br>infarction, congestive heart<br>failure, pneumonia<br>complications from surgery. | Cross-sectional<br>study                                            | Hospital             | US     | Technical quality of care, Medical<br>Patient Safety Indicators (PSIs)- Decubitus<br>Ulcer rates, Infections, Postoperative<br>respiratory<br>failure and postoperative PE or DVT |
| 22<br>23<br>24<br>25                      | Glickman et al.<br>2010 <sup>71</sup>   | Functional | Acute myocardial<br>infarction                                                                        | Cohort Study<br>3562 patients                                       | Hospital             | US     | Inpatient mortality                                                                                                                                                               |
| 26<br>27<br>28                            | Richards et al<br>2006 <sup>72</sup>    | Functional | Psoriasis                                                                                             | Review                                                              | Range of<br>settings | Range  | Adherence                                                                                                                                                                         |
| 29<br>30<br>31<br>32                      | Fremont et al.<br>2001 <sup>73</sup>    | Functional | Cardiac                                                                                               | Survey 1346<br>patients                                             | Hospital             | US     | Cardiac symptoms + Patient reported<br>general physical and mental health status                                                                                                  |
| 33<br>34<br>35                            | Riley et al.<br>2007 <sup>74</sup>      | Functional | Cardiac care - acute<br>coronary                                                                      | Survey 506<br>patients                                              | Hospital             | Canada | cardiac rehabilitation participation,<br>Perceptions of illness consequences                                                                                                      |
| 36<br>37<br>38                            | Weingart et al.<br>2005 <sup>21</sup>   | Functional | No specific disease focus                                                                             | Cohort study                                                        | Hospital             | US     | Adverse events                                                                                                                                                                    |

1  
2  
3  
4  
5  
6  
7  
8  
9  
10  
11  
12  
13  
14  
15  
16  
17  
18  
19  
20  
21  
22  
23  
24  
25  
26  
27  
28  
29  
30  
31  
32  
33  
34  
35  
36  
37  
38  
39  
40  
41  
42  
43  
44  
45  
46  
47  
48  
49

|                                       |            |                           |        |          |    |                |
|---------------------------------------|------------|---------------------------|--------|----------|----|----------------|
| Weissman et al.<br>2008 <sup>22</sup> | Functional | No specific disease focus | Survey | Hospital | US | Adverse events |
|---------------------------------------|------------|---------------------------|--------|----------|----|----------------|

For peer review only

1  
2  
3 **Acknowledgements:** The authors of this work would like to thank Mandy Wearne at NHS  
4 Northwest who commissioned this work and provided comments on earlier drafts and also to  
5 Jocelyn Cornwell who provided comments on an early draft of this article.  
6  
7

8 **Competing interests:** None  
9

10 **Details of funding:** NIHR CLAHRC for Northwest London  
11

12 **Disclaimer:** This article presents independent research commissioned by the National Institute  
13 for Health Research (NIHR) under the Collaborations for Leadership in Applied Health Research  
14 and Care (CLAHRC) programme for North West London. The views expressed in this publication  
15 are those of the author(s) and not necessarily those of the NHS, the NIHR or the Department of  
16 Health.  
17  
18  
19  
20  
21  
22  
23  
24  
25  
26  
27  
28  
29  
30  
31  
32  
33  
34  
35  
36  
37  
38  
39  
40  
41  
42  
43  
44  
45  
46  
47  
48  
49  
50  
51  
52  
53  
54  
55  
56  
57  
58  
59  
60

## References

1. Institute of Medicine. *Crossing the Quality Chasm: a new health system for the 21st century*. Washington DC: National Academy Press, 2001.
2. Black N., Jenkinson C. Measuring patients experiences and outcomes. *BMJ* 2009;339.
3. Department of Health. *Liberating the NHS: Transparency in outcomes – a framework for the NHS*: Department of Health, 2010.
4. Darzi A. *High Quality Care For All – NHS Next Stage Review Final Report*: Department of Health 2008.
5. Department of Health. *Using the Commissioning for Quality and Innovation (CQUIN) payment framework*, 2008.
6. Berwick DM. What "Patient-Centered" Should Mean: Confessions Of An Extremist. *Health Affairs* 2009;28(4):w555-w565.
7. Street RL, Makoul G, Arora NK, et al. How does communication heal? Pathways linking clinician-patient communication to health outcomes. *Patient education and counseling* 2009;74(3):295-301.
8. Thom DH, Hall MA, Pawlson LG. Measuring Patients' Trust In Physicians When Assessing Quality Of Care. *Health Affairs* 2004;23(4):124-132.
9. Vincent CA, Coulter A. Patient safety: what about the patient? *Quality and Safety in Health Care* 2002;11(1):76-80.
10. Coulter A. *Engaging patients in healthcare*. Maidenhead Open University Press 2011.
11. Rathert C, Huddleston N, Pak Y. Acute care patients discuss the patient role in patient safety. *Health Care Management Review*;36(2):134-144 10.1097/HMR.0b013e318208cd31.
12. Picker Institute. *Patient experience surveys: the rationale* Picker Institute Europe, 2008.

- 1  
2  
3  
4 13. NICE. Patient experience in adult NHS services: improving the experience of care for people  
5  
6  
7  
8  
9  
10  
11  
12  
13  
14  
15  
16  
17  
18  
19  
20  
21  
22  
23  
24  
25  
26  
27  
28  
29  
30  
31  
32  
33  
34  
35  
36  
37  
38  
39  
40  
41  
42  
43  
44  
45  
46  
47  
48  
49  
50  
51  
52  
53  
54  
55  
56  
57  
58  
59  
60  
14. López L., Weissman JS., Schneider EC., et al. Disclosure of hospital adverse events and its  
association with patients' ratings of the quality of care. *Arch Intern Med* 2009;169(20 ).
15. Safran DG., Taira DA., Rogers WH., et al. Linking primary care performance to outcomes of  
care. *Journal of Family Practice* 1998;47:213-220.
16. Robert Wood Johnson Foundation. Good for Health, Good for Business: The Case for  
Measuring Patient Experience of Care: The Center for Health Care Quality at the George  
Washington University Medical Center
17. Greenhalgh T., Peacock R. Effectiveness and efficiency of search methods in systematic  
reviews of complex evidence: audit of primary sources. *BMJ* 2005;331(7524):1064-1065.
18. Jha AK, Orav EJ, Zheng J, et al. Patients' Perception of Hospital Care in the United States.  
*New England Journal of Medicine* 2008;359(18):1921-1931.
19. Isaac T, Zaslavsky AM, Cleary PD, et al. The Relationship between Patients' Perception of  
Care and Measures of Hospital Quality and Safety. *Health Services Research*  
2010;45(4):1024-1040.
20. Sequist et al. Quality Monitoring of Physicians: Linking Patients' Experiences of Care to  
Clinical Quality and Outcomes. *Journal of General Internal Medicine* 2008;23(11).
21. Weingart SN, Pagovich O, Sands DZ, et al. What Can Hospitalized Patients Tell Us About  
Adverse Events? Learning from Patient-Reported Incidents. *Journal of General Internal  
Medicine* 2005;20(9):830-836.
22. Weissman JS, Schneider EC, Weingart SN, et al. Comparing Patient-Reported Hospital  
Adverse Events with Medical Record Review: Do Patients Know Something That  
Hospitals Do Not? *Annals of Internal Medicine* 2008;149(2):100-108.

- 1  
2  
3 23. Begg C., Berlin J., N. J. Publication Bias: A Problem in Interpreting Medical Data  
4  
5  
6 *journal of the Royal Statistical Society. Series A (Statistics in Society)* 1988;151(3).  
7
- 8 24. Haynes RB, Ackloo E, Sahota N, et al. Interventions for enhancing medication adherence.  
9  
10 *Cochrane Database Syst Rev* 2008.  
11
- 12 25. O'Connor AM, Bennett CL, Stacey D, et al. Decision aids for people facing health treatment  
13 or screening decisions. *Cochrane database of systematic reviews (Online)*  
14  
15 2009(3):CD001431.  
16  
17
- 18 26. Mumford E, Schlesinger HJ, Glass GV. The effect of psychological intervention on recovery  
19 from surgery and heart attacks: an analysis of the literature. *American Journal of Public*  
20  
21 *Health* 1982;72(2):141-151.  
22  
23
- 24 27. Chang JT, Hays RD, Shekelle PG, et al. Patients' global ratings of their health care are not  
25 associated with the technical quality of their care.  
26  
27 *. Ann Intern Med* 2006;145(8):635-6.  
28  
29
- 30 28. Blasi ZD, Harkness E, Ernst E, et al. Influence of context effects on health outcomes: a  
31 systematic review. *The Lancet* 2001;357(9258):757-762.  
32  
33
- 34 29. Burgers JS, Voerman GE, Grol R, et al. Quality and Coordination of Care for Patients With  
35 Multiple Conditions: Results From an International Survey of Patient Experience.  
36  
37 *Evaluation & the Health Professions* 2010;33(3):343-364.  
38  
39
- 40 30. Drotar D. Physician Behavior in the Care of Pediatric Chronic Illness: Association With Health  
41 Outcomes and Treatment Adherence. *Journal of Developmental & Behavioral Pediatrics*  
42  
43 2009;30(3):246-254 10.1097/DBP.0b013e3181a7ed42.  
44  
45
- 46 31. Hall AM, Ferreira PH, Maher CG, et al. The Influence of the Therapist-Patient Relationship on  
47 Treatment Outcome in Physical Rehabilitation: A Systematic Review. *Physical*  
48  
49 *Therapy*;90(8):1099-1110.  
50  
51  
52  
53  
54  
55  
56  
57  
58  
59  
60

- 1  
2  
3  
4 32. Stevenson FA, Cox K, Britten N, et al. A systematic review of the research on communication  
5 between patients and health care professionals about medicines: the consequences for  
6 concordance. *Health Expectations* 2004;7(3):235-245.  
7  
8  
9  
10 33. Saultz JW, Lochner J. Interpersonal Continuity of Care and Care Outcomes: A Critical Review.  
11  
12 *The Annals of Family Medicine* 2005;3(2):159-166.  
13  
14 34. Kaplan SH, Greenfield S, Ware JE. Assessing the effects of physician-patient interactions on  
15 the outcomes of chronic disease. *Medical Care* 1989;27(3, Suppl):S110-S127.  
16  
17  
18 35. Rao M, Clarke A., Sanderson C., et al. Patients' Own Assessments of Quality of Primary Care  
19 Compared with Objective Records Based Measures of Technical Quality of Care: Cross  
20 Sectional Study. *BMJ* 2006;333(7797).  
21  
22  
23  
24  
25  
26 36. Meterko M, Wright S, Lin H, et al. Mortality among Patients with Acute Myocardial  
27 Infarction: The Influences of Patient-Centered Care and Evidence-Based Medicine.  
28  
29 *Health Services Research*;45(5p1):1188-1204.  
30  
31  
32  
33 37. Hall JA, Roter DL, Katz NR. Meta-analysis of correlates of provider behavior in medical  
34 encounters. *Medical Care* 1988;26(7):657-675.  
35  
36  
37  
38 38. Vincent C, Phillips A, Young M. Why do people sue doctors? A study of patients and relatives  
39 taking legal action. *The Lancet* 1994;343(8913):1609-1613.  
40  
41  
42 39. Agoritsas T, Bovier PA, Perneger TV. Patient Reports of Undesirable Events During  
43 Hospitalization. *Journal of General Internal Medicine* 2005;20(10):922-928.  
44  
45  
46 40. Flocke SA, Stange KC, Zyzanski SJ. The Association of Attributes of Primary Care With the  
47 Delivery of Clinical Preventive Services. *Medical Care* 1998;36(8):AS21-AS30.  
48  
49  
50 41. Jackson JL, Chamberlin J, Kroenke K. Predictors of patient satisfaction. *Social Science &*  
51  
52  
53  
54  
55  
56  
57  
58  
59  
60

- 1  
2  
3  
4 42. Jackson CA, Clatworthy J, Robinson A, et al. Factors Associated With Non-Adherence to Oral  
5 Medication for Inflammatory Bowel Disease: A Systematic Review. *Am J Gastroenterol*  
6 2010;105(3):525-539.  
7  
8  
9  
10 43. Clark NM, Cabana MD, Nan B, et al. The Clinician-Patient Partnership Paradigm: Outcomes  
11 Associated With Physician Communication Behavior. *Clinical Pediatrics* 2008;47(1):49-  
12 57.  
13  
14  
15  
16  
17 44. Raiz LR, Kilty KM, Henry ML, et al. Medication Compliance Following Renal Transplantation.  
18 *Transplantation* 1999;68(1):51-55.  
19  
20  
21 45. Kahn KL, Schneider EC, Malin JL, et al. Patient Centered Experiences in Breast Cancer:  
22 Predicting Long-Term Adherence to Tamoxifen Use. *Medical Care* 2007;45(5):431-439  
23 10.1097/01.mlr.0000257193.10760.7f.  
24  
25  
26  
27  
28 46. Plomondon M, Magid D, Masoudi F, et al. Association Between Angina and Treatment  
29 Satisfaction after Myocardial Infarction. *Journal of General Internal Medicine*  
30 2008;23(1):1-6.  
31  
32  
33  
34  
35 47. Fuertes J, Boylan L, Fontanella J. Behavioral Indices in Medical Care Outcome: The Working  
36 Alliance, Adherence, and Related Factors. *Journal of General Internal Medicine*  
37 2009;24(1):80-85.  
38  
39  
40  
41  
42 48. Lewis ET, Combs A, Trafton JA. Reasons for Under-Use of Prescribed Opioid Medications by  
43 Patients in Pain. *Pain Medicine* 2010;11(6):861-871.  
44  
45  
46  
47 49. Sans-Corrales M, Pujol-Ribera E, GenÃ©-Badia J, et al. Family medicine attributes related to  
48 satisfaction, health and costs. *Family Practice* 2006;23(3):308-316.  
49  
50  
51  
52 50. Hsiao C-J, Boulton C. Effects of Quality on Outcomes in Primary Care: A Review of the  
53 Literature. *American Journal of Medical Quality* 2008;23(4):302-310.  
54  
55  
56  
57  
58  
59  
60



- 1  
2  
3  
4 51. Arbutnott A, Sharpe D. The effect of physician-patient collaboration on patient adherence  
5  
6 in non-psychiatric medicine. *Patient education and counseling* 2009;77(1):60-67.  
7
- 8 52. Stewart MA. Effective physician-patient communication and health outcomes: a review.  
9  
10 *Canadian Medical Association Journal* 1995;152(9):1423-1433.  
11
- 12 53. Alamo MMo, Moral RR, PÃ©rula de Torres LA. Evaluation of a patient-centred approach in  
13  
14 generalized musculoskeletal chronic pain/fibromyalgia patients in primary care. *Patient*  
15  
16 *education and counseling* 2002;48(1):23-31.  
17
- 18 54. Fan VS, Reiber GE, Diehr P, Bet al. Functional Status and Patient Satisfaction. *Journal of*  
19  
20 *General Internal Medicine* 2005;20(5):452-459.  
21  
22
- 23 55. O'Malley AS, Sheppard VB, Schwartz M, et al. The role of trust in use of preventive services  
24  
25 among low-income African-American women. *Preventive Medicine: An International*  
26  
27 *Journal Devoted to Practice and Theory* 2004;38(6):777-785.  
28  
29
- 30 56. Little P., Everitt H., Williamson I., et al. Observational study of effect of patient centredness  
31  
32 and positive approach on outcomes of general practice consultations. *BMJ*  
33  
34 2001;323(7318):908-911.  
35  
36
- 37 57. Levinson W, Roter DL, Mullooly JP, et al. Physician-Patient Communication: The Relationship  
38  
39 With Malpractice Claims Among Primary Care Physicians and Surgeons. *JAMA: The*  
40  
41 *Journal of the American Medical Association* 1997;277(7):553-559.  
42  
43
- 44 58. Carcaise-Edinboro P, Bradley CJ. Influence of Patient-Provider Communication on Colorectal  
45  
46 Cancer Screening. *Medical Care* 2008;46(7):738-745 10.1097/MLR.0b013e318178935a.  
47  
48
- 49 59. Schneider J, Kaplan SH, Greenfield S, et al. Better Physician-Patient Relationships Are  
50  
51 Associated with Higher Reported Adherence to Antiretroviral Therapy in Patients with  
52  
53 HIV Infection. *Journal of General Internal Medicine* 2004;19(11):1096-1103.  
54  
55  
56  
57  
58  
59  
60

- 1  
2  
3  
4 60. Schoenthaler A, Chaplin WF, Allegrante JP, et al. Provider communication effects medication  
5 adherence in hypertensive African Americans. *Patient Education and Counseling*  
6 2009;75(2):185-191.  
7  
8  
9  
10 61. Slatore CG, Cecere LM, Reinke LF et al. *Patient-Clinician Communication: Associations With*  
11 *Important Health Outcomes Among Veterans With COPD*. Northbrook, IL, ETATS-UNIS:  
12 American College of Chest Physicians.  
13  
14  
15  
16  
17 62. Lee Y-Y, Lin JL. The effects of trust in physician on self-efficacy, adherence and diabetes  
18 outcomes. *Social Science & Medicine* 2009;68(6):1060-1068.  
19  
20  
21 63. Heisler M, Bouknight RR, Hayward RA, et al. The Relative Importance of Physician  
22 Communication, Participatory Decision Making, and Patient Understanding in Diabetes  
23 Self-management. *Journal of General Internal Medicine* 2002;17(4):243-252.  
24  
25  
26  
27  
28 64. Lee Y-Y, Lin JL. Do patient autonomy preferences matter? Linking patient-centered care to  
29 patient-physician relationships and health outcomes. *Social Science &*  
30 *Medicine*;71(10):1811-1818.  
31  
32  
33  
34  
35 65. Kennedy A, Nelson E, Reeves D, et al. A randomised controlled trial to assess the impact of a  
36 package comprising a patient-orientated, evidence-based self-help guidebook and  
37 patient-centred consultations on disease management and satisfaction in inflammatory  
38 bowel disease. *Health technology assessment (Winchester, England)* 2003;7(28):iii, 1-  
39 113.  
40  
41  
42  
43  
44  
45  
46 66. Stewart M., Brown J., Donner A., et al. The Impact of Patient-Centered Care on Outcomes.  
47 *Journal of Family Practice* 2000;49(9).  
48  
49  
50  
51 67. Zolnierok H. KB, DiMatteo MR. Physician Communication and Patient Adherence to  
52 Treatment: A Meta-Analysis. *Medical Care* 2009;47(8):826-834  
53  
54  
55  
56 10.1097/MLR.0b013e31819a5acc.  
57  
58  
59  
60

- 1  
2  
3  
4  
5  
6  
7  
8  
9  
10  
11  
12  
13  
14  
15  
16  
17  
18  
19  
20  
21  
22  
23  
24  
25  
26  
27  
28  
29  
30  
31  
32  
33  
34  
35  
36  
37  
38  
39  
40  
41  
42  
43  
44  
45  
46  
47  
48  
49  
50  
51  
52  
53  
54  
55  
56  
57  
58  
59  
60
68. Beck RS, Daughtridge R, Sloane PD. Physician-patient communication in the primary care office: a systematic review. *The Journal of the American Board of Family Practice* 2002;15(1):25-38.
69. Kinnersley P, Stott N, Peters TJ, et al. The patient-centredness of consultations and outcome in primary care. *British Journal of General Practice* 1999;49(446):711-716.
70. Cabana M., Jee S. Does continuity of care improve patient outcomes? *The Journal of Family Practice* 2004;53(12).
71. Glickman SW, Boulding W, Manary M, et al. Patient Satisfaction and Its Relationship With Clinical Quality and Inpatient Mortality in Acute Myocardial Infarction. *Circulation: Cardiovascular Quality and Outcomes*;3(2):188-195.
72. Richards HL, Fortune DG, Griffiths CEM. Adherence to treatment in patients with psoriasis. *Journal of the European Academy of Dermatology and Venereology* 2006;20(4):370-379.
73. Fremont A, Cleary P, Hargraves J, et al. Patient-centered processes of care and long-term outcomes of myocardial infarction. *Journal of General Internal Medicine* 2001;16(12):800-808.
74. Riley DL, Stewart DE, Grace SL. Continuity of cardiac care: Cardiac rehabilitation participation and other correlates. *International Journal of Cardiology* 2007;119(3):326-333.

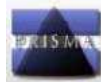

# PRISMA 2009 Checklist

1  
2  
3  
4  
5  
6  
7  
8  
9  
10  
11  
12  
13  
14  
15  
16  
17  
18  
19  
20  
21  
22  
23  
24  
25  
26  
27  
28  
29  
30  
31  
32  
33  
34  
35  
36  
37  
38  
39  
40  
41  
42  
43  
44  
45  
46  
47  
48  
49

| Section/topic                      | #  | Checklist item                                                                                                                                                                                                                                                                                              | Reported on page # |
|------------------------------------|----|-------------------------------------------------------------------------------------------------------------------------------------------------------------------------------------------------------------------------------------------------------------------------------------------------------------|--------------------|
| <b>TITLE</b>                       |    |                                                                                                                                                                                                                                                                                                             |                    |
| Title                              | 1  | Identify the report as a systematic review, meta-analysis, or both.                                                                                                                                                                                                                                         | 1                  |
| <b>ABSTRACT</b>                    |    |                                                                                                                                                                                                                                                                                                             |                    |
| Structured summary                 | 2  | Provide a structured summary including, as applicable: background; objectives; data sources; study eligibility criteria, participants, and interventions; study appraisal and synthesis methods; results; limitations; conclusions and implications of key findings; systematic review registration number. | 2                  |
| <b>INTRODUCTION</b>                |    |                                                                                                                                                                                                                                                                                                             |                    |
| Rationale                          | 3  | Describe the rationale for the review in the context of what is already known.                                                                                                                                                                                                                              | 3                  |
| Objectives                         | 4  | Provide an explicit statement of questions being addressed with reference to participants, interventions, comparisons, outcomes, and study design (PICOS).                                                                                                                                                  | 3                  |
| <b>METHODS</b>                     |    |                                                                                                                                                                                                                                                                                                             |                    |
| Protocol and registration          | 5  | Indicate if a review protocol exists, if and where it can be accessed (e.g., Web address), and, if available, provide registration information including registration number.                                                                                                                               | n/a                |
| Eligibility criteria               | 6  | Specify study characteristics (e.g., PICOS, length of follow-up) and report characteristics (e.g., years considered, language, publication status) used as criteria for eligibility, giving rationale.                                                                                                      | 5                  |
| Information sources                | 7  | Describe all information sources (e.g., databases with dates of coverage, contact with study authors to identify additional studies) in the search and date last searched.                                                                                                                                  | 5                  |
| Search                             | 8  | Present full electronic search strategy for at least one database, including any limits used, such that it could be repeated.                                                                                                                                                                               | 4-5                |
| Study selection                    | 9  | State the process for selecting studies (i.e., screening, eligibility, included in systematic review, and, if applicable, included in the meta-analysis).                                                                                                                                                   | 5                  |
| Data collection process            | 10 | Describe method of data extraction from reports (e.g., piloted forms, independently, in duplicate) and any processes for obtaining and confirming data from investigators.                                                                                                                                  | 5                  |
| Data items                         | 11 | List and define all variables for which data were sought (e.g., PICOS, funding sources) and any assumptions and simplifications made.                                                                                                                                                                       | 5                  |
| Risk of bias in individual studies | 12 | Describe methods used for assessing risk of bias of individual studies (including specification of whether this was done at the study or outcome level), and how this information is to be used in any data synthesis.                                                                                      | 8                  |
| Summary measures                   | 13 | State the principal summary measures (e.g., risk ratio, difference in means).                                                                                                                                                                                                                               | n/a                |
| Synthesis of results               | 14 | Describe the methods of handling data and combining results of studies, if done, including measures of consistency (e.g., $I^2$ for each meta-analysis).                                                                                                                                                    | n/a                |

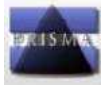

# PRISMA 2009 Checklist

Page 1 of 2

| Section/topic                 | #  | Checklist item                                                                                                                                                                                           | Reported on page # |
|-------------------------------|----|----------------------------------------------------------------------------------------------------------------------------------------------------------------------------------------------------------|--------------------|
| Risk of bias across studies   | 15 | Specify any assessment of risk of bias that may affect the cumulative evidence (e.g., publication bias, selective reporting within studies).                                                             | 8                  |
| Additional analyses           | 16 | Describe methods of additional analyses (e.g., sensitivity or subgroup analyses, meta-regression), if done, indicating which were pre-specified.                                                         | n/a                |
| <b>RESULTS</b>                |    |                                                                                                                                                                                                          |                    |
| Study selection               | 17 | Give numbers of studies screened, assessed for eligibility, and included in the review, with reasons for exclusions at each stage, ideally with a flow diagram.                                          | 5                  |
| Study characteristics         | 18 | For each study, present characteristics for which data were extracted (e.g., study size, PICOS, follow-up period) and provide the citations.                                                             | 12                 |
| Risk of bias within studies   | 19 | Present data on risk of bias of each study and, if available, any outcome level assessment (see item 12).                                                                                                | 8                  |
| Results of individual studies | 20 | For all outcomes considered (benefits or harms), present, for each study: (a) simple summary data for each intervention group (b) effect estimates and confidence intervals, ideally with a forest plot. | 7-8                |
| Synthesis of results          | 21 | Present results of each meta-analysis done, including confidence intervals and measures of consistency.                                                                                                  | n/a                |
| Risk of bias across studies   | 22 | Present results of any assessment of risk of bias across studies (see Item 15).                                                                                                                          | 8                  |
| Additional analysis           | 23 | Give results of additional analyses, if done (e.g., sensitivity or subgroup analyses, meta-regression [see Item 16]).                                                                                    | n/a                |
| <b>DISCUSSION</b>             |    |                                                                                                                                                                                                          |                    |
| Summary of evidence           | 24 | Summarize the main findings including the strength of evidence for each main outcome; consider their relevance to key groups (e.g., healthcare providers, users, and policy makers).                     | 5-7                |
| Limitations                   | 25 | Discuss limitations at study and outcome level (e.g., risk of bias), and at review-level (e.g., incomplete retrieval of identified research, reporting bias).                                            | 7-8                |
| Conclusions                   | 26 | Provide a general interpretation of the results in the context of other evidence, and implications for future research.                                                                                  | 8                  |
| <b>FUNDING</b>                |    |                                                                                                                                                                                                          |                    |
| Funding                       | 27 | Describe sources of funding for the systematic review and other support (e.g., supply of data); role of funders for the systematic review.                                                               | 1                  |

From: Moher D, Liberati A, Tetzlaff J, Altman DG, The PRISMA Group (2009). Preferred Reporting Items for Systematic Reviews and Meta-Analyses: The PRISMA Statement. PLoS Med 6(6): e1000097. doi:10.1371/journal.pmed1000097

For more information, visit: [www.prisma-statement.org](http://www.prisma-statement.org).

Page 2 of 2

For peer review only - <http://bmjopen.bmj.com/site/about/guidelines.xhtml>

## PRISMA Flow Diagram

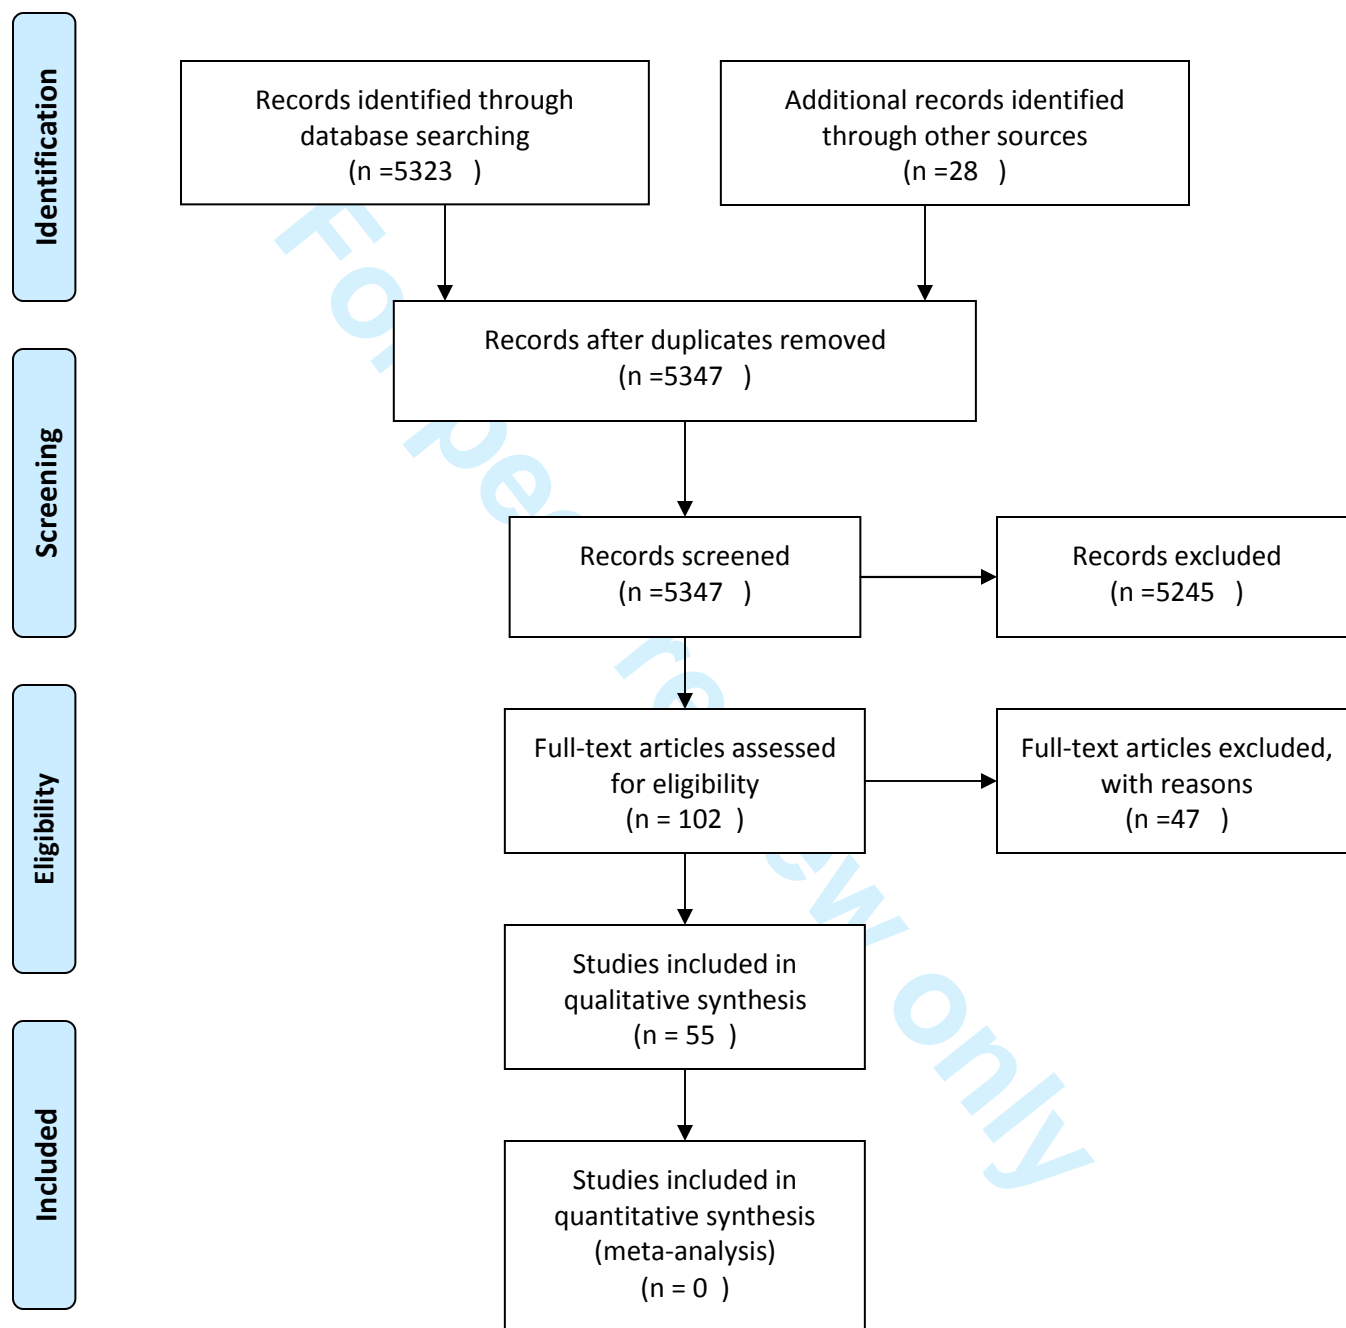

From: Moher D, Liberati A, Tetzlaff J, Altman DG, The PRISMA Group (2009). Preferred Reporting Items for Systematic Reviews and Meta-Analyses: The PRISMA Statement. PLoS Med 6(6): e1000097. doi:10.1371/journal.pmed1000097

For more information, visit [www.prisma-statement.org](http://www.prisma-statement.org).

For peer review only - <http://bmjopen.bmj.com/site/about/guidelines.xhtml>

Chart 1: Disease areas covered

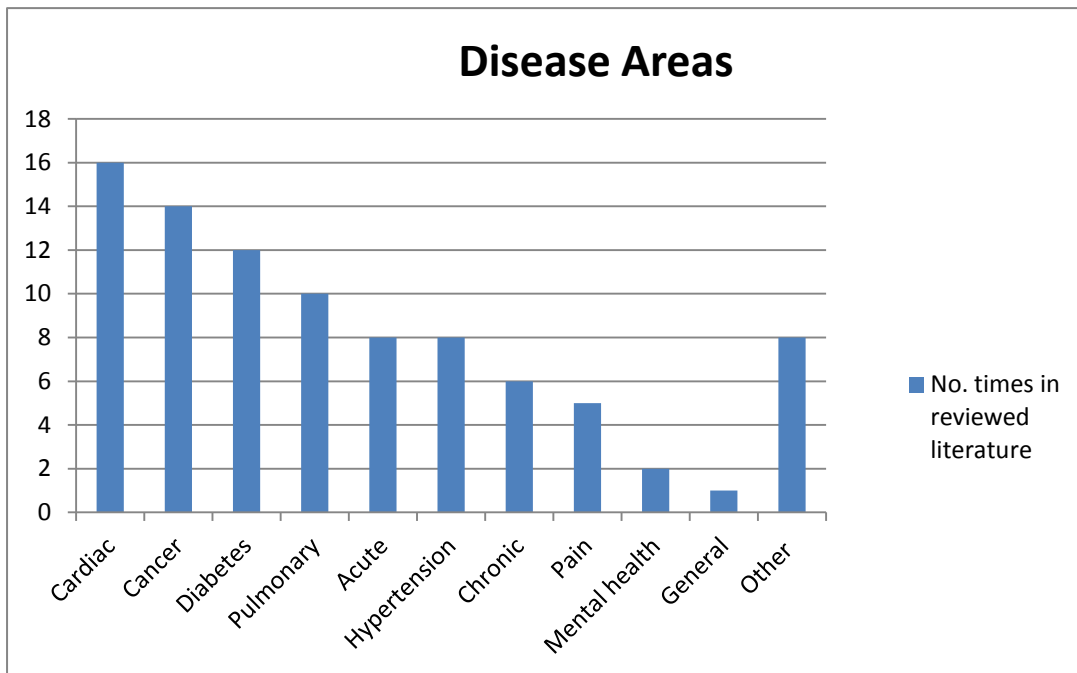

1  
2  
3  
4  
5  
6  
7  
8  
9  
10  
11  
12  
13  
14  
15  
16  
17  
18  
19  
20  
21  
22  
23  
24  
25  
26  
27  
28  
29  
30  
31  
32  
33  
34  
35  
36  
37  
38  
39  
40  
41  
42  
43  
44  
45  
46  
47  
48  
49  
50  
51  
52  
53  
54  
55  
56  
57  
58  
59  
60

review only



**A review of evidence on the links between patient experience and clinical safety and effectiveness**

|                                 |                                                                                                                                                                                                                                      |
|---------------------------------|--------------------------------------------------------------------------------------------------------------------------------------------------------------------------------------------------------------------------------------|
| Journal:                        | <i>BMJ Open</i>                                                                                                                                                                                                                      |
| Manuscript ID:                  | bmjopen-2012-001570.R1                                                                                                                                                                                                               |
| Article Type:                   | Research                                                                                                                                                                                                                             |
| Date Submitted by the Author:   | 17-Sep-2012                                                                                                                                                                                                                          |
| Complete List of Authors:       | Doyle, Cathal; NIHR CLAHRC for NWL, Medicine<br>Lennox, Laura; CLAHRC for NWL, Medicine<br>Bell, Derek; NIHR CLAHRC for NWL, Medicine; Imperial College, Acute<br>Medicine                                                           |
| <b>Primary Subject Heading</b>: | Patient-centred medicine                                                                                                                                                                                                             |
| Secondary Subject Heading:      | Health services research                                                                                                                                                                                                             |
| Keywords:                       | Health & safety < HEALTH SERVICES ADMINISTRATION & MANAGEMENT, Quality in health care < HEALTH SERVICES ADMINISTRATION & MANAGEMENT, Health policy < HEALTH SERVICES ADMINISTRATION & MANAGEMENT, patient experience, Patient safety |
|                                 |                                                                                                                                                                                                                                      |

SCHOLARONE™  
Manuscripts



|                             |                                                                                                                                                                                                                                                                                                                                                                                                                                                                                                                                                                                                                                                                                                                                                                                |
|-----------------------------|--------------------------------------------------------------------------------------------------------------------------------------------------------------------------------------------------------------------------------------------------------------------------------------------------------------------------------------------------------------------------------------------------------------------------------------------------------------------------------------------------------------------------------------------------------------------------------------------------------------------------------------------------------------------------------------------------------------------------------------------------------------------------------|
| <b>Title</b>                | A review of evidence on the links between patient experience and clinical safety and effectiveness                                                                                                                                                                                                                                                                                                                                                                                                                                                                                                                                                                                                                                                                             |
| <b>Authors</b>              | <p>Cathal Doyle- Program Lead for Evaluation, NIHR CLAHRC for North West<sup>1</sup><br/>         Laura Lennox- Research Assistant, NIHR CLAHRC for North West London<sup>1</sup><br/>         and Imperial College London<sup>2</sup><br/>         Derek Bell- Professor of Acute Medicine, NIHR CLAHRC for North West<br/>         London<sup>1</sup> and Imperial College London<sup>2</sup></p> <p><sup>1,2</sup> Chelsea and Westminster Hospital, 369 Fulham Road, London, SW10<br/>         9NH, UK</p>                                                                                                                                                                                                                                                                 |
| <b>Corresponding Author</b> | <p>Name: Cathal Doyle<br/>         Address: CLAHRC NWL, Floor 4 Lift Bank D, Chelsea &amp; Westminster Hospital,<br/>         369 Fulham Road, London, SW10 9NH, UK<br/>         Email: c.doyle@imperial.ac.uk<br/>         Telephone (office): 0203 315 3392</p> <p>"The Corresponding Author has the right to grant on behalf of all authors<br/>         and does grant on behalf of all authors, an exclusive licence (or non<br/>         exclusive for government employees) on a worldwide basis to the BMJ<br/>         Publishing Group Ltd to permit this article (if accepted) to be published in<br/>         BMJ editions and any other BMJ PGL products and sublicences such use and<br/>         exploit all subsidiary rights, as set out in our licence."</p> |
| <b>Keywords:</b>            | Health & safety, Quality in healthcare, Health policy, Patient experience,<br>Patient safety                                                                                                                                                                                                                                                                                                                                                                                                                                                                                                                                                                                                                                                                                   |
| <b>Word Count</b>           | 2521                                                                                                                                                                                                                                                                                                                                                                                                                                                                                                                                                                                                                                                                                                                                                                           |

## Abstract

Objective: To explore evidence on the links between patient experience and clinical safety and effectiveness outcomes.

Design: Systematic review

Setting: A wide range of settings within primary and secondary care including hospitals and primary care centres.

Participants: A wide range of demographic groups and age groups.

Primary and secondary outcome measures: A broad range of safety and effectiveness outcomes including mortality, physical symptoms, length of stay and adherence to treatment.

Results: 55 articles met the inclusion criteria for this review. The evidence indicates consistent associations between patient experience, safety and effectiveness for a wide range of disease areas, settings, outcome measures and study designs. Evidence demonstrates associations between patient experience and self-rated and objectively measured health outcomes; adherence to recommended clinical practice and medication); preventive care (such as health-promoting behavior, use of screening services and immunization; and resource use (such as hospitalization, length of stay and primary care visits). There is some evidence of associations between patient experience and measures of the technical quality of care and adverse events. While some areas would benefit from further research, overall the count of associations found outweigh those not found.

Conclusion: The data presented shows associations between patient experience and clinical effectiveness and safety and supports the case for the inclusion of patient experience as one of the central pillars of quality in health care. It suggests that improvement of patient experience will increase the likelihood of improvements in the other two domains and supports the argument that the three measures should be looked at as a group and not in isolation. Clinicians should resist sidelining patient experience measures as too subjective or mood-orientated, divorced from the 'real' clinical work of measuring safety and effectiveness.

Trial registration: This review was not registered.

## Article Summary

### Article focus:

- Should patient experience, as advocated by the Institute of Medicine and the NHS Outcomes Framework, be seen as one of the pillars of quality in health care alongside clinical safety and effectiveness?
- What aspects of patient experience can be linked to health and safety outcomes?
- What evidence is available on the links between patient experience and clinical safety and effectiveness outcomes?

### Key Messages:

- The results show that patient experience is consistently associated with patient safety and clinical effectiveness across a wide range of disease areas, study designs, settings, population groups and outcome measures.
- Patient experience is associated with: self-rated and objectively measured health outcomes; adherence to recommended medication and treatments; preventive care such as use of screening services and immunizations; healthcare resource use such as hospitalization and primary care visits; the technical quality of care delivery and adverse events
- Improvement to patient experience may increase the likelihood of improvements in clinical outcomes and patient safety.

### Strengths and limitations of this study:

- This study demonstrates an approach to designing a systematic review for the 'catch-all' term patient experience, and brings together evidence from a variety of sources that may otherwise remain dispersed.
- This was a time-limited review and there is scope to expand this search based on the results and broaden the search terms to uncover further evidence.

## Introduction

Patient experience is increasingly recognized as one of three pillars of quality in healthcare alongside safety and clinical effectiveness.<sup>1</sup> In the NHS the measurement of patient experience data to identify strengths and weaknesses of health care delivery, drive quality improvement, inform commissioning and promote patient choice is now mandatory.<sup>2 3 4</sup> In addition to data on harm avoidance or success rates for treatments, providers are now assessed on aspects of care such as dignity and respect, compassion and involvement in care decisions.<sup>4</sup> In England these data are published in Quality Accounts and the Commissioning for Quality & Innovation (CQUINs) payment framework makes a proportion of care providers' income conditional on improvement in this domain.<sup>5</sup>

The inclusion of patient experience as a pillar of quality is often justified on the grounds of its intrinsic value – that the expectation of humane, empathic care is a given and requires no further justification. It is also justified on more utilitarian grounds as a means of improving safety and effectiveness.<sup>6 7</sup> For example, clear information, empathic, two-way communication and respect for patients' beliefs and concerns could lead to patients being more informed and involved in decision making and create an environment where patients are more willing to disclose information. Patients could have more 'ownership' of clinical decisions, entering a 'therapeutic alliance' with clinicians. This could support improved and more timely diagnosis, clinical decisions and advice and lead to fewer unnecessary referrals or diagnostic tests.<sup>8 9</sup> Increased patient agency can encourage greater participation in personal care and compliance with medication, adherence to recommended treatment, monitoring of prescriptions and dose.<sup>10 9</sup> Patients can be informed about what to expect from treatment and be motivated to report adverse events or complications and keep a list of their medical histories, allergies, and current medications.<sup>11</sup>

Patients' direct experience of care process through clinical encounters or as an observer (for example, as a patient on a hospital ward) can provide valuable insights into everyday care. Examples include attention to pain control, assistance with bathing or help with feeding, or the environment (cleanliness, noise, physical safety) or coordination of care between professions or organizations. Given the organizational fragmentation of much healthcare care and the numerous services with which many patients interact, the measurement of patient experience may help provide a 'whole system' perspective not readily available from more discrete safety and effectiveness measures.<sup>11</sup>

Focusing on such utilitarian arguments, this study reviews evidence on links that have been demonstrated between patient experience and safety and effectiveness.

## Methods

### *Identifying variables relevant to patient experience*

Patient experience is a term that encapsulates a number of dimensions and in preliminary database searches this phrase on its own uncovered a limited number of studies. To broaden and structure the search for evidence, identify search terms and provide a framework for analysis it was necessary to identify what patient experience entails and outline potential pathways through which it is proposed to impact on safety and effectiveness. As such, we combined common elements from patient experience frameworks produced by The Institute of Medicine<sup>1</sup>, Picker Institute<sup>12</sup> and NICE<sup>13</sup>.

Table 1 delineates different dimensions of patient experience and distinguishes between 'relational' and 'functional' aspects. Relational aspects refer to interpersonal aspects of care – the ability of clinicians to empathise, respect the preferences of patients, include them in decision making and

provide information to enable self-care.<sup>10</sup> It also refers to patients' expectations that professionals will put their interest above other considerations and be honest and transparent when something goes wrong.<sup>8 14</sup> Functional aspects relate to basic expectations about how care is delivered, such as attention to physical needs, timeliness of care, clean and safe environments, effective coordination between professionals and continuity.

**Table 1: Identifying aspects of patient experience and search terms**

| Relational aspects                                                                                                                                                                                 | Functional aspects                                                                                      |
|----------------------------------------------------------------------------------------------------------------------------------------------------------------------------------------------------|---------------------------------------------------------------------------------------------------------|
| Emotional and psychological support, relieving fear and anxiety, treated with respect, kindness, dignity, compassion, understanding                                                                | Effective treatment delivered by trusted professionals                                                  |
| Participation of patient in decisions and respect and understanding for beliefs, values, concerns, preferences and their understanding of their condition                                          | Timely, tailored and expert management of physical symptoms                                             |
| Involvement of, and support for family and carers in decisions                                                                                                                                     | Attention to physical support needs and environmental needs (e.g. clean, safe, comfortable environment) |
| Clear, comprehensible information and communication tailored to patient needs to support informed decision (awareness of available options, risks and benefits of treatments) and enable self-care | Coordination and continuity of care; smooth transitions from one setting to another                     |
| Transparency, honesty, disclosure when something goes wrong                                                                                                                                        |                                                                                                         |

Using these frameworks and discursive documents in this area of research<sup>10 15 16 9</sup> as a guide we identified words and phrases commonly used to denote aspects of patient experience, examples of which are listed in Table 2.

**Table 2: Search terms denoting patient experience:**

patient-centred care; patient engagement; clinical interaction; patient-clinician; clinician-patient; patient-doctor; doctor-patient; physician-patient; patient-physician; patient-provider; interpersonal treatment; physician discussion; trust in physician; empathy; compassion; respect; responsiveness; patient preferences; shared decision making; therapeutic alliance; participation in decisions; decision making; autonomy; caring; kindness; dignity; honesty; participation; right to decide; physical comfort; involvement (of family, carers, friends); emotional support; continuity (of care); smooth transition; emotional support;

1  
2  
3  
4  
5 These were combined with search terms representing patient safety and effectiveness outcomes  
6 hypothesized to be associated with patient experience in discursive literature. We searched for a  
7 broad range of outcome measures, including both self-rated and 'objective' measurements of health  
8 status, physical and mental health and wellbeing, the use of preventive health services, compliance  
9 or adherence to health-promoting behavior and resource use.  
10

11  
12 Combining these two sets of search terms in the EMBASE database, we identified 5323 papers  
13 whose abstracts were then reviewed. If deemed relevant the full article was retrieved to assess  
14 whether it met the inclusion criteria.  
15

16 Given concerns about the sole use of protocol-driven search strategies for complex evidence<sup>17</sup> we  
17 combined this search with a 'snowballing' method, pursuing references of references, citations and  
18 'related articles' functions in PubMed for those articles identified in the initial search.  
19

#### 20 *Inclusion criteria, assessment of quality and categorisation of evidence*

21 We included studies that measured associations between patients' reporting of their experience  
22 and safety and effectiveness outcomes. These included studies measuring associations between  
23 experience and outcomes at either at a patient level (i.e data on both types of variables for the same  
24 patients) or at an organizational level (i.e. associations between aggregated patient measures of  
25 experience and outcomes for the same type of organisation such as a hospital or primary care  
26 practice). (TEXT REMOVED ...We excluded studies of interventions to improve aspects of relevance  
27 to patient experience, although we refer to some of this evidence in the discussion).  
28  
29

30 We included studies where the variables denoting both patient experience and safety and  
31 effectiveness were measured in a credible way, through the use of validated tools. For patient  
32 experience variables these include surveys covering several aspects of experience (such as Picker  
33 Surveys and the Hospital Consumer Assessment of Healthcare Providers and Systems survey) and  
34 specific aspects (such as a 'Working Alliance Scale'<sup>18</sup>, Multidimensional Health Locus of Control  
35 Scale (MHLC) scale<sup>19</sup> or usual provider continuity (UPC) index<sup>20</sup>). For safety and effectiveness these  
36 include, for example, generic health and quality of life surveys (such as Short-Form 36 (SF36)),  
37 disease-specific surveys (such as the Seattle Angina Questionnaire<sup>21</sup>) measures of the technical  
38 quality of care (such as the Hospital Quality Alliance (HQA) score, reviews of medical records and  
39 care provider data.<sup>22</sup> Details of the methods used to measure both variables in each study are  
40 included in Tables 6 and 7.)  
41  
42

43 We included studies where the sample size of patients or organizations appeared sufficiently large  
44 to conduct meaningful statistical analysis (excluding studies with fewer than 50 subjects) and took  
45 account of differences in perspectives between demographic groups. When extracting data relevant  
46 to our study from systematic reviews we selected only those studies that met these criteria.  
47  
48

49 We then counted both associations found and not found for each study. Associations refer to cases  
50 where one measure of patient experience (typically an overall rating of patient experience for a care  
51 provider) has a statistically significant association with one or more effectiveness or safety variable.  
52 If a study showed associations between several aspects of patient experience that appeared to be  
53 closely related (for example, 'listening', 'empathy', or 'respect') and an aspect of effectiveness or  
54 safety, this was counted as one association found. This was to avoid exaggerating the weight of the  
55 evidence by 'over counting' associations.  
56  
57  
58  
59  
60

Two main types of studies emerged in the search – those focusing on interventions to improve aspects of patient experience and those exploring associations between patient experience variables and safety and effectiveness variables. To manage the scope of this time-limited review we decided to restrict analysis of the large number of interventions to the evidence contained within systematic reviews.

(TEXT REMOVED) Table 2 presents evidence in order of patient experience focus, distinguishing between those articles with a broad focus (looking at both ‘relational and functional’ aspects outlined in Figure 1) and those focusing on a single aspect. Within these categories, studies are then presented in order of breadth of disease focus and then by study design (with systematic reviews presented first).

Overall, the evidence indicates associations between patient experience and safety and effectiveness that appear consistent across a range of disease areas, study designs, settings, population groups and outcome measures. Associations found outweigh those not found by 429 to 127. Of the four studies where evidence against associations outweigh evidence for associations there is no suggestion that these are methodologically superior.

Table 3 shows surveys to be the predominant method used to measure variables for individual studies.

**Table 3: Methods used to measure variables**

|                                                                   | No of studies |
|-------------------------------------------------------------------|---------------|
| <b>Patient experience variables</b>                               |               |
| Survey                                                            | 31            |
| Interviews                                                        | 2             |
| Medical records                                                   | 1             |
| <b>Effectiveness &amp; safety variables</b>                       |               |
| Survey for self-rated healthcare                                  | 12            |
| Other survey                                                      | 14            |
| Medical records                                                   | 3             |
| Data monitoring quality of care delivery (e.g. audit, HQA, HEDIS) | 3             |
| Care provider outcome data                                        | 3             |
| Physical examination                                              | 1             |
| Patient interviews                                                | 2             |

Chart 1 outlines the disease areas covered. **(Chart 1 inserted here)**

Table 4 presents the frequency of associations categorized by type of outcomes (where a description was available). These include; objectively measured health outcomes (for example, 'mortality', 'blood glucose levels', 'infections', 'medical errors'); self-reported health and wellbeing outcomes (for example, 'health status', 'functional ability' 'quality of life', 'anxiety' ); adherence to recommended treatment and use of of preventive care services likely to improve health outcomes (for examples, 'medication compliance', 'adherence to treatment' and screening for a variety of conditions); outcomes related to healthcare resource use (for example 'hospitalizations', 'hospital readmission', 'emergency department use', 'primary care visits'); errors or adverse events and measures of the technical quality of care.

**Table 4: Associations categorised by type of outcome**

|                               | Objective' health outcomes | Self-reported health and wellbeing | Adherence to treatment (including medication) | Preventive care | Healthcare resource use | Adverse events | Technical quality of care | All categories |
|-------------------------------|----------------------------|------------------------------------|-----------------------------------------------|-----------------|-------------------------|----------------|---------------------------|----------------|
| No. of associations found     | 29                         | 61                                 | 152                                           | 24              | 31                      | 7              | 8                         | 312            |
| No. of associations not found | 11                         | 36                                 | 7                                             | 2               | 6                       | 0              | 4                         | 66             |

Table 5 shows associations categorised by type of care provider and for chronic conditions.

| Table 5: Weight of evidence by provider and for chronic conditions | Associations found | Associations not found |
|--------------------------------------------------------------------|--------------------|------------------------|
| Primary care                                                       | 110                | 48                     |
| Hospital                                                           | 43                 | 17                     |
| Chronic conditions                                                 | 53                 | 9                      |

Tables 6 and 7 present details of all studies identified, specifying the analytical focus of each study, methods to measure variables and associations found.

(TEXT AND PREVIOUS TABLE 3 REMOVED ?Table 3 outlines the range of outcome measures where associations with patient experience and outcomes related to safety and effectiveness were demonstrated. )

**Table 3: Outcomes related to safety and effectiveness demonstrated**

| Category  | Associations demonstrated                                          | Count |
|-----------|--------------------------------------------------------------------|-------|
| Adherence | Adherence to/compliance with medications and recommended treatment | 16    |



|                                  |                                                                                   |   |
|----------------------------------|-----------------------------------------------------------------------------------|---|
| Screening                        | Cancer screening, Cholesterol screening                                           | 8 |
| Symptoms                         | Symptom burden, discomfort & concern                                              | 7 |
| Hospitalization & Length of Stay | Hospitalization, length of stay                                                   | 6 |
| Doctor visits                    | Doctor visits, Well-child visits, Preventive visits, Prenatal visits              | 6 |
| Immunization                     | Use and timeliness of Immunization services - MMR vaccination, influenza          | 5 |
| Diabetes care                    | Diabetes self-management and adherence to recommended care, blood glucose control | 5 |
| Self reported health             | Self reported health and well-being                                               | 4 |
| Function                         | Functional status, physical function, physical mobility                           | 4 |
| Blood pressure                   | Blood pressure control, Hypertension control                                      | 3 |
| Pain                             | Pain levels                                                                       | 2 |
| Patient ability                  | Patient ability to deal with dyspnea, angina                                      | 2 |
| Mortality                        | Inpatient mortality, mortality                                                    | 2 |

(TEXT REMOVED – REPLACED WITH MORE DETAILED DISCUSSION BELOW) This review found numerous studies showing associations between patients' rating of their experience and adherence to medical treatment and advice, compliance with medication, symptom resolution and self-rated health. There is consistent evidence of better use of preventive services such as cancer screening and immunization. Some studies show an association with physical health outcome measures including blood pressure, blood glucose and mortality.

There is also evidence showing associations between patients' perspective or observations of processes of care and the technical quality and safety of care for the same population group recorded through other means. For example, two large-scale studies of hospitals in the US found patient experience measures associated with technical quality of care for myocardial infarction, congestive heart failure, pneumonia and complications from surgery. A similar study in primary care found associations between patient experience and processes of care related to prevention and disease management. Other studies comparing interviews with patients on their experience of individual adverse events with the official reporting of these same events by staff, found underreporting by healthcare providers.

Table 3 and 4 focus on studies where associations with safety and effectiveness were demonstrated. Not all studies demonstrated associations, but those showing associations between patient experience and the other two domains of quality outweigh those that don't. )

## Discussion

Overall, the evidence indicates associations between patient experience, safety and effectiveness that appears consistent across a range of disease areas, study designs and settings.

As Table 4 indicates, the evidence shows associations found outweigh those not found for both self-assessment of physical and mental health (61 vs 36) and 'objective' measures of health outcomes (e.g. where measures are taken by a clinician or by reviewing medical records) (29 vs 11). For objective measures, one study<sup>23</sup> shows associations for ulcer disease, hypertension and breast cancer. Two studies on myocardial infarction show associations with survival one year after discharge<sup>24</sup> and inpatient mortality.<sup>25</sup> Objective measurement is less frequently explored than self-rated health and is an area that could benefit from further research.

Evidence is strong in the case of adherence to recommended medical treatment. A meta-analysis included in this study showed associations between the quality of patient communications and adherence to medical treatment in 125 out of 127 studies analysed and showed the odds of patient adherence 1.62 times higher for physicians with communication training compared to those without.<sup>26</sup> Regarding compliance with medication, associations found outweigh those not found.<sup>19</sup>  
<sup>27-33</sup> A review of interventions to increase adherence to medication (not included in this study) showed communication of information, good provider-patient relationships and patients' agreement with the need for treatment as common determinants of effectiveness.<sup>34</sup> There is evidence of better use of preventive services, such as screening services in diabetes, colorectal, breast and cervical cancer; cholesterol testing and immunization.<sup>23 35-38</sup> There is also evidence of impacts on resource use of primary and secondary care (such as hospitalizations, readmissions and primary care visits).<sup>20</sup>  
<sup>27 39-44</sup>

For studies exploring associations between patient experience and technical quality of care measured by other means the evidence is mixed. Two studies in acute care (ADD REFS) showed associations between overall ratings of patient experience and ratings of the technical quality of care (using Hospital Quality Alliance (HQA) measures) for myocardial infarction, congestive heart failure, pneumonia and complications from surgery.<sup>22 45</sup> Another found an association with adherence to clinical guidelines for acute myocardial infarction.<sup>25</sup> A similar study in primary care found associations between patient experience of processes and measurement of care quality (from the HEDIS system measuring care quality for disease prevention and management in chronic conditions).<sup>35</sup> However, two other studies found no associations between patients' ratings and ratings based on an assessment of medical records.<sup>46 47</sup>

There is evidence showing associations between patients' perspective or observations of processes of care and the safety of care recorded through other means. Isaac (add ref) found associations between ratings of patient experience and six patient safety indicators (decubitus ulcer; failure to rescue; infections due to medical care; postoperative hemorrhage, respiratory failure, pulmonary embolism and sepsis). Two studies, examining evidence for patients' ability to identify medical errors or adverse events in hospital, showed associations between patients' accounts of their experience of adverse events and the documentation of events in medical records.<sup>48 49</sup> But another study shows only 2% of patient-reported errors were classified by medical reviewers as 'real clinical medical errors' with most 'reclassified' by clinicians as 'misunderstandings' or 'behaviour or communication problems'.<sup>50</sup> Overall there is less evidence available on safety compared to effectiveness and this should be a priority for future research in this area.

1  
2  
3 Research from other studies not included in this review support these findings. For example,  
4 research on 'decision aids' to ensure patients are well informed about their treatments and that  
5 decisions reflect the preferences of patients indicate that patient engagement has a beneficial  
6 impact on outcomes. For example, awareness of the risks of surgical procedures resulted in a 23%  
7 reduction in surgical interventions and better functional status.<sup>51</sup> Another review showed that  
8 provision of good information and emotional support are associated with better recovery from  
9 surgery and heart attacks.<sup>52</sup>

### 11 **Study strengths and limitations**

12 This review builds on other studies<sup>9 10 15 16</sup> demonstrating links between these three domains. This  
13 study also demonstrates an approach to designing a systematic search for evidence for the 'catch-all'  
14 term patient experience, bringing together evidence from a variety of sources that may otherwise  
15 remain dispersed. This approach can be used or adapted for further research in this area.

16  
17  
18 This was a time-limited review and there is scope to expand this search based on our results. There  
19 may be scope to broaden the search terms and this may uncover further evidence. The first search  
20 was confined to one database and the review focused primarily on peer-reviewed literature  
21 excluding gray literature. To manage the scope of this review we decided to restrict the analysis of  
22 interventions to improve patient experience to evidence within systematic reviews. The suggested  
23 association between measures of patient experience and safety and effectiveness described does  
24 not entail causality. Although all associations included in the study are statistically significant, the  
25 strength of associations vary. Due to time constraints and the heterogeneity of measures used we  
26 did not systematically compare the strengths of associations in different studies but this may be an  
27 area for future work. As always, there may be a publication bias in favour of studies showing  
28 positive associations between patient experience variables and safety and effectiveness outcomes<sup>53</sup>  
29 In addition, most studies were conducted in the United States and caution is needed about their  
30 applicability to other healthcare systems.

31  
32  
33 Although there are areas that would benefit from further research, the data presented  
34 supports the view that patient experience data, robustly collected and analysed, may  
35 highlight strengths and risks in effectiveness and safety and that focusing on improving  
36 patient experience will increase the likelihood of improvements in the other two domains.  
37 There are aspects of patient experience that will help to explain performance in safety and  
38 effectiveness and vice-versa.

### 41 **Conclusion**

42 The evidence suggests that attention to these various dimensions of patient-centred care  
43 outlined in Table 1 may result in important clinical benefits and more effective use of health  
44 care resources, particularly for chronic conditions, where most healthcare resources are  
45 consumed. There is also some evidence to suggest that patients can be used as partners in  
46 identifying poor and unsafe practice and help enhance quality and safety.

47  
48  
49 This supports the argument that the three measures should be looked at as a group and not  
50 in isolation. Clinicians should resist sidelining patient experience measures as too subjective  
51 or mood-orientated, divorced from the 'real' clinical work of measuring and delivering  
52 safety and effectiveness.

Table 6: Individual studies

| Author                            | Type of study, sample size, country        | Setting                   | Disease focus                                                                                  | Unit of analysis (Patient (P) or org (O)) | Patient experience focus and method used -                                                                                                                                   | Safety & effectiveness measure -                                                                                                                     | Association demonstrated                                                                                                                                                                                             | Association NOT demonstrated                                                           | Assoc. Found vs NOT found |
|-----------------------------------|--------------------------------------------|---------------------------|------------------------------------------------------------------------------------------------|-------------------------------------------|------------------------------------------------------------------------------------------------------------------------------------------------------------------------------|------------------------------------------------------------------------------------------------------------------------------------------------------|----------------------------------------------------------------------------------------------------------------------------------------------------------------------------------------------------------------------|----------------------------------------------------------------------------------------|---------------------------|
| Chang et al. 2006 <sup>47</sup>   | Cohort study, 236 patients, US             | Managed care organisation | 22 clinical conditions                                                                         | P                                         | Providers communication (The Consumer Assessment of Healthcare Providers and Systems survey and 'Quality of care')                                                           | Technical quality and patient global ratings (Medical records and patient interviews)                                                                | None                                                                                                                                                                                                                 | Technical quality of care                                                              | 0/1                       |
| Sequist et al. 2008 <sup>35</sup> | Cross-sectional study, 492 settings, US    | Primary care              | Cervical, breast and colorectal cancer, chlamydia, cardiovascular conditions, asthma, diabetes | P                                         | Doctor-patient communication, clinical team interactions, organizational features of care (The Ambulatory Care Experiences Survey)                                           | Clinical quality focusing on disease prevention, disease management and outcomes of care (Healthcare Effectiveness Data and Information Set (HEDIS)) | Cervical cancer, breast cancer and colorectal cancer screening, Chlamydia screening, Cholesterol screening (cardiac), LDL cholesterol testing (diabetes), eye exams (diabetes), HbA1c testing, nephropathy screening | Cholesterol management, HbA1c control, LDL cholesterol control, blood pressure control | 9/4                       |
| Burgers et al. 2010 <sup>54</sup> | Survey, 8973 patients, Range               | Range of settings         | Chronic lung, mental health, hypertension, heart disease, diabetes, arthritis, cancer.         | P                                         | Coordination of care and overall experience (Commonwealth Fund International Health Policy Survey)                                                                           | Morbidity score                                                                                                                                      | Morbidity score                                                                                                                                                                                                      | None                                                                                   | 1/0                       |
| Kaplan et al. 1989 <sup>23</sup>  | Randomised control trial, 252 patients, US | Range of settings         | Ulcer disease, hypertension, diabetes, breast cancer                                           | P                                         | Physician-patient communication (Assessment of audio tape and questionnaire)                                                                                                 | Physiologic measures taken at visit and patients' self-rated health status survey.                                                                   | Follow up blood glucose and blood pressure, functional health status, self reported health status.                                                                                                                   | None                                                                                   | 4/0                       |
| Jha et al. 2008 <sup>22</sup>     | Cross-sectional study, 2429 settings, US   | Hospital                  | Acute myocardial infarction, congestive heart failure, pneumonia complications from surgery.   | O                                         | Patient communication with clinicians, experience of nursing services, discharge planning (Hospital Consumer Assessment of Healthcare Providers and Systems (HCAHPS) survey) | Technical quality of care using Hospital Quality Alliance (HQA) score                                                                                | Technical quality of care in AMI, CHF, pneumonia, surgical care                                                                                                                                                      | None                                                                                   | 4/0                       |

|    |                                       |                                                   |                                 |                                     |   |                                                                                                                                                                                                          |                                                                                                                                        |                                                                                                                                  |                                                             |     |
|----|---------------------------------------|---------------------------------------------------|---------------------------------|-------------------------------------|---|----------------------------------------------------------------------------------------------------------------------------------------------------------------------------------------------------------|----------------------------------------------------------------------------------------------------------------------------------------|----------------------------------------------------------------------------------------------------------------------------------|-------------------------------------------------------------|-----|
| 1  |                                       |                                                   |                                 |                                     |   |                                                                                                                                                                                                          |                                                                                                                                        |                                                                                                                                  |                                                             |     |
| 2  |                                       |                                                   |                                 |                                     |   |                                                                                                                                                                                                          |                                                                                                                                        |                                                                                                                                  |                                                             |     |
| 3  |                                       |                                                   |                                 |                                     |   |                                                                                                                                                                                                          |                                                                                                                                        |                                                                                                                                  |                                                             |     |
| 4  |                                       |                                                   |                                 |                                     |   |                                                                                                                                                                                                          |                                                                                                                                        |                                                                                                                                  |                                                             |     |
| 5  | Rao et al. 2006 <sup>46</sup>         | Cross sectional study, 3487 patients, UK          | Primary care                    | Hypertension, Influenza vaccination | P | Older patients' experience of technical quality of care (General Practice Assessment survey)                                                                                                             | Technical quality of care - (medical records)                                                                                          | None                                                                                                                             | Hypertension monitoring and control, influenza vaccination. | 0/3 |
| 6  |                                       |                                                   |                                 |                                     |   |                                                                                                                                                                                                          |                                                                                                                                        |                                                                                                                                  |                                                             |     |
| 7  |                                       |                                                   |                                 |                                     |   |                                                                                                                                                                                                          |                                                                                                                                        |                                                                                                                                  |                                                             |     |
| 8  |                                       |                                                   |                                 |                                     |   |                                                                                                                                                                                                          |                                                                                                                                        |                                                                                                                                  |                                                             |     |
| 9  | Meterko et al. 2010 <sup>24</sup>     | Cohort study, 1858 patients, US                   | Veteran Affairs Medical Centres | Acute myocardial infarction         | P | Patient-centred care, access, courtesy, information, coordination, patient preferences, emotional support, family involvement, physical comfort (VA Survey of Healthcare Experiences of Patients (SHEP)) | Survival 1-year postdischarge                                                                                                          | Survival 1-year postdischarge                                                                                                    | None                                                        | 1/0 |
| 10 |                                       |                                                   |                                 |                                     |   |                                                                                                                                                                                                          |                                                                                                                                        |                                                                                                                                  |                                                             |     |
| 11 |                                       |                                                   |                                 |                                     |   |                                                                                                                                                                                                          |                                                                                                                                        |                                                                                                                                  |                                                             |     |
| 12 |                                       |                                                   |                                 |                                     |   |                                                                                                                                                                                                          |                                                                                                                                        |                                                                                                                                  |                                                             |     |
| 13 |                                       |                                                   |                                 |                                     |   |                                                                                                                                                                                                          |                                                                                                                                        |                                                                                                                                  |                                                             |     |
| 14 |                                       |                                                   |                                 |                                     |   |                                                                                                                                                                                                          |                                                                                                                                        |                                                                                                                                  |                                                             |     |
| 15 |                                       |                                                   |                                 |                                     |   |                                                                                                                                                                                                          |                                                                                                                                        |                                                                                                                                  |                                                             |     |
| 16 |                                       |                                                   |                                 |                                     |   |                                                                                                                                                                                                          |                                                                                                                                        |                                                                                                                                  |                                                             |     |
| 17 | Vincent et al. 1994 <sup>55</sup>     | Cohort Survey 227 patients, UK                    | Range of settings               | Varied                              | P | Accountability, explanation, standards of care, compensation (Questionnaire)                                                                                                                             | Legal action                                                                                                                           | Legal action                                                                                                                     | None                                                        | 1/0 |
| 18 |                                       |                                                   |                                 |                                     |   |                                                                                                                                                                                                          |                                                                                                                                        |                                                                                                                                  |                                                             |     |
| 19 |                                       |                                                   |                                 |                                     |   |                                                                                                                                                                                                          |                                                                                                                                        |                                                                                                                                  |                                                             |     |
| 20 |                                       |                                                   |                                 |                                     |   |                                                                                                                                                                                                          |                                                                                                                                        |                                                                                                                                  |                                                             |     |
| 21 |                                       |                                                   |                                 |                                     |   |                                                                                                                                                                                                          |                                                                                                                                        |                                                                                                                                  |                                                             |     |
| 22 | Agoritsas et al. 2005 <sup>56</sup>   | Cohort patient survey, 1518 patients, Switzerland | Hospital                        | Varied                              | P | Global rating of care and respect and dignity questions (Picker survey)                                                                                                                                  | Patient reports of undesirable events (survey)                                                                                         | Neglect of important information by health care staff, pain control, needless repetition of a test, being handled with roughness | None                                                        | 4/0 |
| 23 |                                       |                                                   |                                 |                                     |   |                                                                                                                                                                                                          |                                                                                                                                        |                                                                                                                                  |                                                             |     |
| 24 |                                       |                                                   |                                 |                                     |   |                                                                                                                                                                                                          |                                                                                                                                        |                                                                                                                                  |                                                             |     |
| 25 |                                       |                                                   |                                 |                                     |   |                                                                                                                                                                                                          |                                                                                                                                        |                                                                                                                                  |                                                             |     |
| 26 | Flocke et al. 1998 <sup>36</sup>      | Cross-sectional study, 2889 patients, US          | Primary care                    | Varied                              | P | Interpersonal communication, physician's knowledge of patient, coordination (Components of Primary Care Instrument (CPCI))                                                                               | Use of preventive care services (screening, health habit counseling services, immunization services)                                   | Screening, health habit counselling, immunization                                                                                | None                                                        | 3/0 |
| 27 |                                       |                                                   |                                 |                                     |   |                                                                                                                                                                                                          |                                                                                                                                        |                                                                                                                                  |                                                             |     |
| 28 |                                       |                                                   |                                 |                                     |   |                                                                                                                                                                                                          |                                                                                                                                        |                                                                                                                                  |                                                             |     |
| 29 |                                       |                                                   |                                 |                                     |   |                                                                                                                                                                                                          |                                                                                                                                        |                                                                                                                                  |                                                             |     |
| 30 |                                       |                                                   |                                 |                                     |   |                                                                                                                                                                                                          |                                                                                                                                        |                                                                                                                                  |                                                             |     |
| 31 |                                       |                                                   |                                 |                                     |   |                                                                                                                                                                                                          |                                                                                                                                        |                                                                                                                                  |                                                             |     |
| 32 | Jackson, J. et al. 2001 <sup>57</sup> | Quantitative Cohort study 500 patients, US        | General medicine walk-in clinic | Varied                              | P | Patient satisfaction (RAND 9-item survey)                                                                                                                                                                | Functional status (Medical Outcomes Study Short-Form Health Survey [SF-6]), symptom resolution, (RAND 9-item survey), follow-up visits | Symptom resolution, repeat visits, functional status                                                                             | None                                                        | 3/0 |
| 33 |                                       |                                                   |                                 |                                     |   |                                                                                                                                                                                                          |                                                                                                                                        |                                                                                                                                  |                                                             |     |
| 34 |                                       |                                                   |                                 |                                     |   |                                                                                                                                                                                                          |                                                                                                                                        |                                                                                                                                  |                                                             |     |
| 35 |                                       |                                                   |                                 |                                     |   |                                                                                                                                                                                                          |                                                                                                                                        |                                                                                                                                  |                                                             |     |
| 36 |                                       |                                                   |                                 |                                     |   |                                                                                                                                                                                                          |                                                                                                                                        |                                                                                                                                  |                                                             |     |
| 37 |                                       |                                                   |                                 |                                     |   |                                                                                                                                                                                                          |                                                                                                                                        |                                                                                                                                  |                                                             |     |
| 38 |                                       |                                                   |                                 |                                     |   |                                                                                                                                                                                                          |                                                                                                                                        |                                                                                                                                  |                                                             |     |
| 39 |                                       |                                                   |                                 |                                     |   |                                                                                                                                                                                                          |                                                                                                                                        |                                                                                                                                  |                                                             |     |
| 40 |                                       |                                                   |                                 |                                     |   |                                                                                                                                                                                                          |                                                                                                                                        |                                                                                                                                  |                                                             |     |
| 41 |                                       |                                                   |                                 |                                     |   |                                                                                                                                                                                                          |                                                                                                                                        |                                                                                                                                  |                                                             |     |
| 42 |                                       |                                                   |                                 |                                     |   |                                                                                                                                                                                                          |                                                                                                                                        |                                                                                                                                  |                                                             |     |
| 43 |                                       |                                                   |                                 |                                     |   |                                                                                                                                                                                                          |                                                                                                                                        |                                                                                                                                  |                                                             |     |
| 44 |                                       |                                                   |                                 |                                     |   |                                                                                                                                                                                                          |                                                                                                                                        |                                                                                                                                  |                                                             |     |
| 45 |                                       |                                                   |                                 |                                     |   |                                                                                                                                                                                                          |                                                                                                                                        |                                                                                                                                  |                                                             |     |
| 46 |                                       |                                                   |                                 |                                     |   |                                                                                                                                                                                                          |                                                                                                                                        |                                                                                                                                  |                                                             |     |
| 47 |                                       |                                                   |                                 |                                     |   |                                                                                                                                                                                                          |                                                                                                                                        |                                                                                                                                  |                                                             |     |
| 48 |                                       |                                                   |                                 |                                     |   |                                                                                                                                                                                                          |                                                                                                                                        |                                                                                                                                  |                                                             |     |
| 49 |                                       |                                                   |                                 |                                     |   |                                                                                                                                                                                                          |                                                                                                                                        |                                                                                                                                  |                                                             |     |

|    |                                     |                                             |                   |                       |   |                                                                                                                        |                                                                                                                                                                           |                                                                                                |      |     |
|----|-------------------------------------|---------------------------------------------|-------------------|-----------------------|---|------------------------------------------------------------------------------------------------------------------------|---------------------------------------------------------------------------------------------------------------------------------------------------------------------------|------------------------------------------------------------------------------------------------|------|-----|
| 1  |                                     |                                             |                   |                       |   |                                                                                                                        |                                                                                                                                                                           |                                                                                                |      |     |
| 2  |                                     |                                             |                   |                       |   |                                                                                                                        |                                                                                                                                                                           |                                                                                                |      |     |
| 3  |                                     |                                             |                   |                       |   |                                                                                                                        |                                                                                                                                                                           |                                                                                                |      |     |
| 4  |                                     |                                             |                   |                       |   |                                                                                                                        |                                                                                                                                                                           |                                                                                                |      |     |
| 5  | Clark et al. 2007 <sup>40</sup>     | Randomized control trial 731 patients, US   | Range of settings | Asthma                | P | Patient experience of physician communication (Patient interviews and Lickert Scale)                                   | Emergency department visits, hospitalizations, office phone calls and visits, urgent office visits (Survey + Medical chart review of 6% of patients to verify responses.) | Number of office visits, emergency visits, urgent office visits, phone calls, hospitalizations | None | 5/0 |
| 6  |                                     |                                             |                   |                       |   |                                                                                                                        |                                                                                                                                                                           |                                                                                                |      |     |
| 7  |                                     |                                             |                   |                       |   |                                                                                                                        |                                                                                                                                                                           |                                                                                                |      |     |
| 8  |                                     |                                             |                   |                       |   |                                                                                                                        |                                                                                                                                                                           |                                                                                                |      |     |
| 9  |                                     |                                             |                   |                       |   |                                                                                                                        |                                                                                                                                                                           |                                                                                                |      |     |
| 10 |                                     |                                             |                   |                       |   |                                                                                                                        |                                                                                                                                                                           |                                                                                                |      |     |
| 11 |                                     |                                             |                   |                       |   |                                                                                                                        |                                                                                                                                                                           |                                                                                                |      |     |
| 12 |                                     |                                             |                   |                       |   |                                                                                                                        |                                                                                                                                                                           |                                                                                                |      |     |
| 13 | Raiz et al. 1999 <sup>19</sup>      | Quantitative Cohort Study, 357 patients, US | Primary care      | Renal transplant      | P | Patient faith in doctor (Multidimensional Health Locus of Control Scale (MHLC))                                        | Medication compliance                                                                                                                                                     | Remembering medications, taking medications as prescribed                                      | None | 2/0 |
| 14 |                                     |                                             |                   |                       |   |                                                                                                                        |                                                                                                                                                                           |                                                                                                |      |     |
| 15 |                                     |                                             |                   |                       |   |                                                                                                                        |                                                                                                                                                                           |                                                                                                |      |     |
| 16 |                                     |                                             |                   |                       |   |                                                                                                                        |                                                                                                                                                                           |                                                                                                |      |     |
| 17 | Kahn et al. 2007 <sup>30</sup>      | Cohort study, 881 patients, US              | Hospitals         | Breast cancer         | P | Level of physician support, participation in decision-making and information on side effects (Survey)                  | Medication adherence                                                                                                                                                      | Ongoing tamoxifen use                                                                          | None | 1/0 |
| 18 |                                     |                                             |                   |                       |   |                                                                                                                        |                                                                                                                                                                           |                                                                                                |      |     |
| 19 |                                     |                                             |                   |                       |   |                                                                                                                        |                                                                                                                                                                           |                                                                                                |      |     |
| 20 |                                     |                                             |                   |                       |   |                                                                                                                        |                                                                                                                                                                           |                                                                                                |      |     |
| 21 | Plomondon et al. 2008 <sup>21</sup> | Cohort study, 1815 patients, US             | Hospital          | Myocardial infarction | P | Satisfaction with explanations from their doctor, overall satisfaction with treatment (Seattle Angina questionnaire)   | Presence of angina (Seattle Angina Questionnaire)                                                                                                                         | Presence of angina                                                                             | None | 1/0 |
| 22 |                                     |                                             |                   |                       |   |                                                                                                                        |                                                                                                                                                                           |                                                                                                |      |     |
| 23 |                                     |                                             |                   |                       |   |                                                                                                                        |                                                                                                                                                                           |                                                                                                |      |     |
| 24 |                                     |                                             |                   |                       |   |                                                                                                                        |                                                                                                                                                                           |                                                                                                |      |     |
| 25 |                                     |                                             |                   |                       |   |                                                                                                                        |                                                                                                                                                                           |                                                                                                |      |     |
| 26 | Fuertes et al. 2008 <sup>18</sup>   | Survey, 152 patients, US                    | Hospital          | Neurology             | P | Physician-patient communication, Physician-Patient Working Alliance, Empathy, Multicultural Competence (Questionnaire) | Adherence to medical treatment (Adherence Self-Efficacy Scale and Medical Outcome Study (MOS) Adherence Scale).                                                           | Adherence to treatment                                                                         | None | 1/0 |
| 27 |                                     |                                             |                   |                       |   |                                                                                                                        |                                                                                                                                                                           |                                                                                                |      |     |
| 28 |                                     |                                             |                   |                       |   |                                                                                                                        |                                                                                                                                                                           |                                                                                                |      |     |
| 29 |                                     |                                             |                   |                       |   |                                                                                                                        |                                                                                                                                                                           |                                                                                                |      |     |
| 30 |                                     |                                             |                   |                       |   |                                                                                                                        |                                                                                                                                                                           |                                                                                                |      |     |
| 31 |                                     |                                             |                   |                       |   |                                                                                                                        |                                                                                                                                                                           |                                                                                                |      |     |
| 32 | Lewis et al. 2010 <sup>29</sup>     | Qualitative cohort study, 191 patients, US  | Primary care      | Pain                  | P | Doctor-Patient Communication (Survey)                                                                                  | Medication adherence (Prescription Drug Use Questionnaire (PDUQ))                                                                                                         | Use of Prescribed Opioid Medications                                                           | None | 1/0 |
| 33 |                                     |                                             |                   |                       |   |                                                                                                                        |                                                                                                                                                                           |                                                                                                |      |     |
| 34 |                                     |                                             |                   |                       |   |                                                                                                                        |                                                                                                                                                                           |                                                                                                |      |     |
| 35 |                                     |                                             |                   |                       |   |                                                                                                                        |                                                                                                                                                                           |                                                                                                |      |     |
| 36 |                                     |                                             |                   |                       |   |                                                                                                                        |                                                                                                                                                                           |                                                                                                |      |     |
| 37 |                                     |                                             |                   |                       |   |                                                                                                                        |                                                                                                                                                                           |                                                                                                |      |     |
| 38 |                                     |                                             |                   |                       |   |                                                                                                                        |                                                                                                                                                                           |                                                                                                |      |     |
| 39 |                                     |                                             |                   |                       |   |                                                                                                                        |                                                                                                                                                                           |                                                                                                |      |     |
| 40 |                                     |                                             |                   |                       |   |                                                                                                                        |                                                                                                                                                                           |                                                                                                |      |     |
| 41 |                                     |                                             |                   |                       |   |                                                                                                                        |                                                                                                                                                                           |                                                                                                |      |     |
| 42 |                                     |                                             |                   |                       |   |                                                                                                                        |                                                                                                                                                                           |                                                                                                |      |     |
| 43 |                                     |                                             |                   |                       |   |                                                                                                                        |                                                                                                                                                                           |                                                                                                |      |     |
| 44 |                                     |                                             |                   |                       |   |                                                                                                                        |                                                                                                                                                                           |                                                                                                |      |     |
| 45 |                                     |                                             |                   |                       |   |                                                                                                                        |                                                                                                                                                                           |                                                                                                |      |     |
| 46 |                                     |                                             |                   |                       |   |                                                                                                                        |                                                                                                                                                                           |                                                                                                |      |     |
| 47 |                                     |                                             |                   |                       |   |                                                                                                                        |                                                                                                                                                                           |                                                                                                |      |     |
| 48 |                                     |                                             |                   |                       |   |                                                                                                                        |                                                                                                                                                                           |                                                                                                |      |     |
| 49 |                                     |                                             |                   |                       |   |                                                                                                                        |                                                                                                                                                                           |                                                                                                |      |     |

|    |                                    |                                          |              |                                                  |   |                                                                                                                                 |                                                                                                                                                                                                                    |                                                                                                                                                                                             |                                                                                                                                                    |      |
|----|------------------------------------|------------------------------------------|--------------|--------------------------------------------------|---|---------------------------------------------------------------------------------------------------------------------------------|--------------------------------------------------------------------------------------------------------------------------------------------------------------------------------------------------------------------|---------------------------------------------------------------------------------------------------------------------------------------------------------------------------------------------|----------------------------------------------------------------------------------------------------------------------------------------------------|------|
| 1  |                                    |                                          |              |                                                  |   |                                                                                                                                 |                                                                                                                                                                                                                    |                                                                                                                                                                                             |                                                                                                                                                    |      |
| 2  |                                    |                                          |              |                                                  |   |                                                                                                                                 |                                                                                                                                                                                                                    |                                                                                                                                                                                             |                                                                                                                                                    |      |
| 3  |                                    |                                          |              |                                                  |   |                                                                                                                                 |                                                                                                                                                                                                                    |                                                                                                                                                                                             |                                                                                                                                                    |      |
| 4  |                                    |                                          |              |                                                  |   |                                                                                                                                 |                                                                                                                                                                                                                    |                                                                                                                                                                                             |                                                                                                                                                    |      |
| 5  | Safran et al. 1998 <sup>58</sup>   | Cross-sectional study, 7204 patients, US | Primary care | Varied                                           | P | Accessibility, continuity, integration, clinical interaction, interpersonal aspects, trust (The Primary Care Assessment Survey) | Adherence to physician's advice, health status, health outcomes (Medical Outcomes Study (MOS), Behavioral Risk Factor Survey.)                                                                                     | Adherence, health status                                                                                                                                                                    | Health outcomes                                                                                                                                    | 2/1  |
| 6  |                                    |                                          |              |                                                  |   |                                                                                                                                 |                                                                                                                                                                                                                    |                                                                                                                                                                                             |                                                                                                                                                    |      |
| 7  |                                    |                                          |              |                                                  |   |                                                                                                                                 |                                                                                                                                                                                                                    |                                                                                                                                                                                             |                                                                                                                                                    |      |
| 8  |                                    |                                          |              |                                                  |   |                                                                                                                                 |                                                                                                                                                                                                                    |                                                                                                                                                                                             |                                                                                                                                                    |      |
| 9  |                                    |                                          |              |                                                  |   |                                                                                                                                 |                                                                                                                                                                                                                    |                                                                                                                                                                                             |                                                                                                                                                    |      |
| 10 |                                    |                                          |              |                                                  |   |                                                                                                                                 |                                                                                                                                                                                                                    |                                                                                                                                                                                             |                                                                                                                                                    |      |
| 11 |                                    |                                          |              |                                                  |   |                                                                                                                                 |                                                                                                                                                                                                                    |                                                                                                                                                                                             |                                                                                                                                                    |      |
| 12 | Alamo et al. 2002 <sup>59</sup>    | Randomized study, 81, Spain              | Primary care | Chronic musculoskeletal pain (CMP), fibromyalgia | P | Patient centered-care ('Gatha-Res questionnaire' and follow-up phone call)                                                      | Pain (Visual Analogue Scale (VAS) anxiety (Oldberg scale of anxiety and depression (GHQ))                                                                                                                          | Anxiety, number of tender points (pain)                                                                                                                                                     | Pain, pain intensity, pain as a problem, number of associated symptoms, depression, physical mobility, social isolation, emotional reaction, sleep | 2/10 |
| 13 |                                    |                                          |              |                                                  |   |                                                                                                                                 |                                                                                                                                                                                                                    |                                                                                                                                                                                             |                                                                                                                                                    |      |
| 14 |                                    |                                          |              |                                                  |   |                                                                                                                                 |                                                                                                                                                                                                                    |                                                                                                                                                                                             |                                                                                                                                                    |      |
| 15 |                                    |                                          |              |                                                  |   |                                                                                                                                 |                                                                                                                                                                                                                    |                                                                                                                                                                                             |                                                                                                                                                    |      |
| 16 |                                    |                                          |              |                                                  |   |                                                                                                                                 |                                                                                                                                                                                                                    |                                                                                                                                                                                             |                                                                                                                                                    |      |
| 17 |                                    |                                          |              |                                                  |   |                                                                                                                                 |                                                                                                                                                                                                                    |                                                                                                                                                                                             |                                                                                                                                                    |      |
| 18 |                                    |                                          |              |                                                  |   |                                                                                                                                 |                                                                                                                                                                                                                    |                                                                                                                                                                                             |                                                                                                                                                    |      |
| 19 |                                    |                                          |              |                                                  |   |                                                                                                                                 |                                                                                                                                                                                                                    |                                                                                                                                                                                             |                                                                                                                                                    |      |
| 20 |                                    |                                          |              |                                                  |   |                                                                                                                                 |                                                                                                                                                                                                                    |                                                                                                                                                                                             |                                                                                                                                                    |      |
| 21 |                                    |                                          |              |                                                  |   |                                                                                                                                 |                                                                                                                                                                                                                    |                                                                                                                                                                                             |                                                                                                                                                    |      |
| 22 | Fan et al. 2005 <sup>60</sup>      | Survey, 21689 patients, US               | Primary care | Cardiac care, diabetes, COPD                     | P | Communication skills and humanistic qualities of primary care physician (Seattle Outpatient Satisfaction Survey)                | Physical and emotional aspects, coping ability and symptom burden for angina, COPD and diabetes (Seattle Angina Questionnaire (SAQ), Obstructive Lung Disease Questionnaire (SOLDQ), Diabetes Questionnaire (SDQ)) | Patient ability to deal with all 3 diseases, education for diabetes patients, angina stability, physical limitation due to angina                                                           | Self-reported physical limitation for angina and COPD, symptom burden for diabetes, complications for diabetes                                     | 7/4  |
| 23 |                                    |                                          |              |                                                  |   |                                                                                                                                 |                                                                                                                                                                                                                    |                                                                                                                                                                                             |                                                                                                                                                    |      |
| 24 |                                    |                                          |              |                                                  |   |                                                                                                                                 |                                                                                                                                                                                                                    |                                                                                                                                                                                             |                                                                                                                                                    |      |
| 25 |                                    |                                          |              |                                                  |   |                                                                                                                                 |                                                                                                                                                                                                                    |                                                                                                                                                                                             |                                                                                                                                                    |      |
| 26 |                                    |                                          |              |                                                  |   |                                                                                                                                 |                                                                                                                                                                                                                    |                                                                                                                                                                                             |                                                                                                                                                    |      |
| 27 |                                    |                                          |              |                                                  |   |                                                                                                                                 |                                                                                                                                                                                                                    |                                                                                                                                                                                             |                                                                                                                                                    |      |
| 28 |                                    |                                          |              |                                                  |   |                                                                                                                                 |                                                                                                                                                                                                                    |                                                                                                                                                                                             |                                                                                                                                                    |      |
| 29 |                                    |                                          |              |                                                  |   |                                                                                                                                 |                                                                                                                                                                                                                    |                                                                                                                                                                                             |                                                                                                                                                    |      |
| 30 |                                    |                                          |              |                                                  |   |                                                                                                                                 |                                                                                                                                                                                                                    |                                                                                                                                                                                             |                                                                                                                                                    |      |
| 31 |                                    |                                          |              |                                                  |   |                                                                                                                                 |                                                                                                                                                                                                                    |                                                                                                                                                                                             |                                                                                                                                                    |      |
| 32 | O'Malley et al. 2004 <sup>37</sup> | Cross-sectional study, 961 patients, US  | Primary care | Varied                                           | P | Patient trust (Survey)                                                                                                          | Use of preventive care services                                                                                                                                                                                    | Blood pressure measurement, height and weight measurement, cholesterol check, pap tests, breast cancer screening, colorectal cancer screening, discussion of diet, discussion on depression | None                                                                                                                                               | 8/0  |
| 33 |                                    |                                          |              |                                                  |   |                                                                                                                                 |                                                                                                                                                                                                                    |                                                                                                                                                                                             |                                                                                                                                                    |      |
| 34 |                                    |                                          |              |                                                  |   |                                                                                                                                 |                                                                                                                                                                                                                    |                                                                                                                                                                                             |                                                                                                                                                    |      |
| 35 |                                    |                                          |              |                                                  |   |                                                                                                                                 |                                                                                                                                                                                                                    |                                                                                                                                                                                             |                                                                                                                                                    |      |
| 36 |                                    |                                          |              |                                                  |   |                                                                                                                                 |                                                                                                                                                                                                                    |                                                                                                                                                                                             |                                                                                                                                                    |      |
| 37 |                                    |                                          |              |                                                  |   |                                                                                                                                 |                                                                                                                                                                                                                    |                                                                                                                                                                                             |                                                                                                                                                    |      |
| 38 |                                    |                                          |              |                                                  |   |                                                                                                                                 |                                                                                                                                                                                                                    |                                                                                                                                                                                             |                                                                                                                                                    |      |
| 39 | Little et al. 2001 <sup>61</sup>   | Survey, 865 patients, UK                 | Primary care | varied                                           | P | Patient centredness (Survey)                                                                                                    | Enablement, symptom burden, resource use                                                                                                                                                                           | Enablement, symptom burden, referrals                                                                                                                                                       | Reattendance, investigations                                                                                                                       | 3/2  |
| 40 |                                    |                                          |              |                                                  |   |                                                                                                                                 |                                                                                                                                                                                                                    |                                                                                                                                                                                             |                                                                                                                                                    |      |
| 41 |                                    |                                          |              |                                                  |   |                                                                                                                                 |                                                                                                                                                                                                                    |                                                                                                                                                                                             |                                                                                                                                                    |      |
| 42 |                                    |                                          |              |                                                  |   |                                                                                                                                 |                                                                                                                                                                                                                    |                                                                                                                                                                                             |                                                                                                                                                    |      |
| 43 |                                    |                                          |              |                                                  |   |                                                                                                                                 |                                                                                                                                                                                                                    |                                                                                                                                                                                             |                                                                                                                                                    |      |
| 44 |                                    |                                          |              |                                                  |   |                                                                                                                                 |                                                                                                                                                                                                                    |                                                                                                                                                                                             |                                                                                                                                                    |      |
| 45 |                                    |                                          |              |                                                  |   |                                                                                                                                 |                                                                                                                                                                                                                    |                                                                                                                                                                                             |                                                                                                                                                    |      |
| 46 |                                    |                                          |              |                                                  |   |                                                                                                                                 |                                                                                                                                                                                                                    |                                                                                                                                                                                             |                                                                                                                                                    |      |
| 47 |                                    |                                          |              |                                                  |   |                                                                                                                                 |                                                                                                                                                                                                                    |                                                                                                                                                                                             |                                                                                                                                                    |      |
| 48 |                                    |                                          |              |                                                  |   |                                                                                                                                 |                                                                                                                                                                                                                    |                                                                                                                                                                                             |                                                                                                                                                    |      |
| 49 |                                    |                                          |              |                                                  |   |                                                                                                                                 |                                                                                                                                                                                                                    |                                                                                                                                                                                             |                                                                                                                                                    |      |

|    |                                                |                                                  |                   |                   |   |                                                                                                         |                                                                                                                                  |                                                                                                                                   |                   |     |
|----|------------------------------------------------|--------------------------------------------------|-------------------|-------------------|---|---------------------------------------------------------------------------------------------------------|----------------------------------------------------------------------------------------------------------------------------------|-----------------------------------------------------------------------------------------------------------------------------------|-------------------|-----|
| 1  |                                                |                                                  |                   |                   |   |                                                                                                         |                                                                                                                                  |                                                                                                                                   |                   |     |
| 2  |                                                |                                                  |                   |                   |   |                                                                                                         |                                                                                                                                  |                                                                                                                                   |                   |     |
| 3  |                                                |                                                  |                   |                   |   |                                                                                                         |                                                                                                                                  |                                                                                                                                   |                   |     |
| 4  |                                                |                                                  |                   |                   |   |                                                                                                         |                                                                                                                                  |                                                                                                                                   |                   |     |
| 5  | Levinson et al. 1997 <sup>62</sup>             | Qualitative cohort study, 124 physicians, US     | Primary care      | Varied            | P | Physician-patient communication (Assessment of audiotape)                                               | Malpractice                                                                                                                      | Malpractice claims                                                                                                                | None              | 1/0 |
| 6  |                                                |                                                  |                   |                   |   |                                                                                                         |                                                                                                                                  |                                                                                                                                   |                   |     |
| 7  |                                                |                                                  |                   |                   |   |                                                                                                         |                                                                                                                                  |                                                                                                                                   |                   |     |
| 8  |                                                |                                                  |                   |                   |   |                                                                                                         |                                                                                                                                  |                                                                                                                                   |                   |     |
| 9  | Carcaise-Edinboro & Bradley 2008 <sup>38</sup> | Cross sectional study, 8488 patients, US         | Primary care      | Colorectal cancer | P | Patient-provider communication (Consumer Assessment of Healthcare Providers and Systems (CAHPS) survey) | Colorectal Cancer screening, fecal occult blood testing, and colonoscopy (Medical Expenditure Panel Survey)                      | CRC screening, fecal occult blood testing, colonoscopy                                                                            | None              | 3/0 |
| 10 |                                                |                                                  |                   |                   |   |                                                                                                         |                                                                                                                                  |                                                                                                                                   |                   |     |
| 11 |                                                |                                                  |                   |                   |   |                                                                                                         |                                                                                                                                  |                                                                                                                                   |                   |     |
| 12 |                                                |                                                  |                   |                   |   |                                                                                                         |                                                                                                                                  |                                                                                                                                   |                   |     |
| 13 |                                                |                                                  |                   |                   |   |                                                                                                         |                                                                                                                                  |                                                                                                                                   |                   |     |
| 14 |                                                |                                                  |                   |                   |   |                                                                                                         |                                                                                                                                  |                                                                                                                                   |                   |     |
| 15 | Schneider et al. 2004 <sup>31</sup>            | Cross-sectional analysis study, 554 patients, US | Primary care      | HIV               | P | Physician-patient relationship (Survey)                                                                 | Adherence (Survey)                                                                                                               | Adherence to antiretroviral therapy                                                                                               | None              | 1/0 |
| 16 |                                                |                                                  |                   |                   |   |                                                                                                         |                                                                                                                                  |                                                                                                                                   |                   |     |
| 17 |                                                |                                                  |                   |                   |   |                                                                                                         |                                                                                                                                  |                                                                                                                                   |                   |     |
| 18 |                                                |                                                  |                   |                   |   |                                                                                                         |                                                                                                                                  |                                                                                                                                   |                   |     |
| 19 |                                                |                                                  |                   |                   |   |                                                                                                         |                                                                                                                                  |                                                                                                                                   |                   |     |
| 20 | Schoenthaler et al. 2008 <sup>32</sup>         | Cross-sectional study, 439 patients, US          | Primary care      | Hypertension      | P | Patients' perceptions of providers' communication (Survey)                                              | Medication adherence (Morisky self-report measure)                                                                               | Medication adherence                                                                                                              | None              | 1/0 |
| 21 |                                                |                                                  |                   |                   |   |                                                                                                         |                                                                                                                                  |                                                                                                                                   |                   |     |
| 22 |                                                |                                                  |                   |                   |   |                                                                                                         |                                                                                                                                  |                                                                                                                                   |                   |     |
| 23 | Slatore et al. 2010 <sup>63</sup>              | Cross sectional study, 342 patients, US          | Range of settings | COPD              | P | Patient-clinician communication (Quality of communication questionnaire (QOC))                          | Self-reported breathing problem confidence, and general self-rated health (Survey)                                               | Confidence in dealing with breathing problems                                                                                     | Self-rated health | 1/1 |
| 24 |                                                |                                                  |                   |                   |   |                                                                                                         |                                                                                                                                  |                                                                                                                                   |                   |     |
| 25 |                                                |                                                  |                   |                   |   |                                                                                                         |                                                                                                                                  |                                                                                                                                   |                   |     |
| 26 |                                                |                                                  |                   |                   |   |                                                                                                         |                                                                                                                                  |                                                                                                                                   |                   |     |
| 27 | Lee & Lin 2009 <sup>64</sup>                   | Cohort study, 480 patients, Taiwan               | Range of settings | Type 2 diabetes   | P | Trust in physicians (Survey)                                                                            | Self-efficacy, adherence, health outcomes (Multidimensional Diabetes Questionnaire and 12-Item Short-Form Health Survey (SF-12)) | Physical HRQoL, mental HRQoL, body mass index HbA1c, triglycerides, complications, self-efficacy, outcome expectations, adherence | None              | 9/0 |
| 28 |                                                |                                                  |                   |                   |   |                                                                                                         |                                                                                                                                  |                                                                                                                                   |                   |     |
| 29 |                                                |                                                  |                   |                   |   |                                                                                                         |                                                                                                                                  |                                                                                                                                   |                   |     |
| 30 |                                                |                                                  |                   |                   |   |                                                                                                         |                                                                                                                                  |                                                                                                                                   |                   |     |
| 31 |                                                |                                                  |                   |                   |   |                                                                                                         |                                                                                                                                  |                                                                                                                                   |                   |     |
| 32 |                                                |                                                  |                   |                   |   |                                                                                                         |                                                                                                                                  |                                                                                                                                   |                   |     |
| 33 | Heisler et al. 2002 <sup>33</sup>              | Survey, 1314 patients, US                        | primary care      | Diabetes          | P | Physician communication, physician interaction styles, participatory decision making (Questionnaire)    | Disease management (Surveys and national databases)                                                                              | Overall self-management, diabetes diet, medication compliance, exercise, blood glucose monitoring, foot care.                     | Exercise          | 6/1 |
| 34 |                                                |                                                  |                   |                   |   |                                                                                                         |                                                                                                                                  |                                                                                                                                   |                   |     |
| 35 |                                                |                                                  |                   |                   |   |                                                                                                         |                                                                                                                                  |                                                                                                                                   |                   |     |
| 36 |                                                |                                                  |                   |                   |   |                                                                                                         |                                                                                                                                  |                                                                                                                                   |                   |     |
| 37 |                                                |                                                  |                   |                   |   |                                                                                                         |                                                                                                                                  |                                                                                                                                   |                   |     |
| 38 |                                                |                                                  |                   |                   |   |                                                                                                         |                                                                                                                                  |                                                                                                                                   |                   |     |
| 39 |                                                |                                                  |                   |                   |   |                                                                                                         |                                                                                                                                  |                                                                                                                                   |                   |     |
| 40 |                                                |                                                  |                   |                   |   |                                                                                                         |                                                                                                                                  |                                                                                                                                   |                   |     |
| 41 |                                                |                                                  |                   |                   |   |                                                                                                         |                                                                                                                                  |                                                                                                                                   |                   |     |
| 42 |                                                |                                                  |                   |                   |   |                                                                                                         |                                                                                                                                  |                                                                                                                                   |                   |     |
| 43 |                                                |                                                  |                   |                   |   |                                                                                                         |                                                                                                                                  |                                                                                                                                   |                   |     |
| 44 |                                                |                                                  |                   |                   |   |                                                                                                         |                                                                                                                                  |                                                                                                                                   |                   |     |
| 45 |                                                |                                                  |                   |                   |   |                                                                                                         |                                                                                                                                  |                                                                                                                                   |                   |     |
| 46 |                                                |                                                  |                   |                   |   |                                                                                                         |                                                                                                                                  |                                                                                                                                   |                   |     |
| 47 |                                                |                                                  |                   |                   |   |                                                                                                         |                                                                                                                                  |                                                                                                                                   |                   |     |
| 48 |                                                |                                                  |                   |                   |   |                                                                                                         |                                                                                                                                  |                                                                                                                                   |                   |     |
| 49 |                                                |                                                  |                   |                   |   |                                                                                                         |                                                                                                                                  |                                                                                                                                   |                   |     |



|    |                                         |                                                           |                      |                               |   |                                                                                                                                                        |                                                                                                                                                                                  |                                                                                                                              |                                                                                                                                                                                                                                                                                                                                |      |
|----|-----------------------------------------|-----------------------------------------------------------|----------------------|-------------------------------|---|--------------------------------------------------------------------------------------------------------------------------------------------------------|----------------------------------------------------------------------------------------------------------------------------------------------------------------------------------|------------------------------------------------------------------------------------------------------------------------------|--------------------------------------------------------------------------------------------------------------------------------------------------------------------------------------------------------------------------------------------------------------------------------------------------------------------------------|------|
| 1  |                                         |                                                           |                      |                               |   |                                                                                                                                                        |                                                                                                                                                                                  |                                                                                                                              |                                                                                                                                                                                                                                                                                                                                |      |
| 2  |                                         |                                                           |                      |                               |   |                                                                                                                                                        |                                                                                                                                                                                  |                                                                                                                              |                                                                                                                                                                                                                                                                                                                                |      |
| 3  |                                         |                                                           |                      |                               |   |                                                                                                                                                        |                                                                                                                                                                                  |                                                                                                                              |                                                                                                                                                                                                                                                                                                                                |      |
| 4  |                                         |                                                           |                      |                               |   |                                                                                                                                                        |                                                                                                                                                                                  |                                                                                                                              |                                                                                                                                                                                                                                                                                                                                |      |
| 5  | Lee & Lin<br>2010 <sup>65</sup>         | Cohort study,<br>614 patients,<br>Taiwan                  | Range of<br>settings | Type 2 diabetes               | P | Patients' perceptions of<br>support, autonomy, trust,<br>satisfaction (Health Care<br>Climate Questionnaire and<br>Autonomy Preference Index<br>(API)) | Glycosylated<br>hemoglobin (HbA1C)<br>(medical records)<br>Physical and mental<br>health-related quality of<br>life (HRQoL) (SF-12)                                              | Physical HRQoL, mental HRQoL                                                                                                 | Information<br>preference<br>interaction, HbA1C                                                                                                                                                                                                                                                                                | 2/2  |
| 6  |                                         |                                                           |                      |                               |   |                                                                                                                                                        |                                                                                                                                                                                  |                                                                                                                              |                                                                                                                                                                                                                                                                                                                                |      |
| 7  |                                         |                                                           |                      |                               |   |                                                                                                                                                        |                                                                                                                                                                                  |                                                                                                                              |                                                                                                                                                                                                                                                                                                                                |      |
| 8  |                                         |                                                           |                      |                               |   |                                                                                                                                                        |                                                                                                                                                                                  |                                                                                                                              |                                                                                                                                                                                                                                                                                                                                |      |
| 9  |                                         |                                                           |                      |                               |   |                                                                                                                                                        |                                                                                                                                                                                  |                                                                                                                              |                                                                                                                                                                                                                                                                                                                                |      |
| 10 |                                         |                                                           |                      |                               |   |                                                                                                                                                        |                                                                                                                                                                                  |                                                                                                                              |                                                                                                                                                                                                                                                                                                                                |      |
| 11 | Kennedy A.<br>et al. 2003 <sup>66</sup> | Randomised<br>control trial,<br>700 patients,<br>UK       | Hospital             | Inflammatory bowel<br>Disease | P | Patient centered-care<br>(Interviews)                                                                                                                  | Resource use, self-rated<br>physical and mental<br>health, enablement<br>(Patient diaries,<br>questionnaires, medical<br>records)                                                | Ability to cope with condition,<br>symptom relapses, hospital visits,<br>appointments made                                   | Physical<br>functioning, role<br>limitations, social<br>functioning, mental<br>health,<br>energy/vitality,<br>pain, general<br>health perception,<br>anxiety, number of<br>relapses, number of<br>medically-defined<br>relapses, average<br>relapse duration,<br>frequency of GP<br>visits, delay before<br>starting treatment | 4/13 |
| 12 |                                         |                                                           |                      |                               |   |                                                                                                                                                        |                                                                                                                                                                                  |                                                                                                                              |                                                                                                                                                                                                                                                                                                                                |      |
| 13 |                                         |                                                           |                      |                               |   |                                                                                                                                                        |                                                                                                                                                                                  |                                                                                                                              |                                                                                                                                                                                                                                                                                                                                |      |
| 14 |                                         |                                                           |                      |                               |   |                                                                                                                                                        |                                                                                                                                                                                  |                                                                                                                              |                                                                                                                                                                                                                                                                                                                                |      |
| 15 |                                         |                                                           |                      |                               |   |                                                                                                                                                        |                                                                                                                                                                                  |                                                                                                                              |                                                                                                                                                                                                                                                                                                                                |      |
| 16 |                                         |                                                           |                      |                               |   |                                                                                                                                                        |                                                                                                                                                                                  |                                                                                                                              |                                                                                                                                                                                                                                                                                                                                |      |
| 17 |                                         |                                                           |                      |                               |   |                                                                                                                                                        |                                                                                                                                                                                  |                                                                                                                              |                                                                                                                                                                                                                                                                                                                                |      |
| 18 |                                         |                                                           |                      |                               |   |                                                                                                                                                        |                                                                                                                                                                                  |                                                                                                                              |                                                                                                                                                                                                                                                                                                                                |      |
| 19 |                                         |                                                           |                      |                               |   |                                                                                                                                                        |                                                                                                                                                                                  |                                                                                                                              |                                                                                                                                                                                                                                                                                                                                |      |
| 20 |                                         |                                                           |                      |                               |   |                                                                                                                                                        |                                                                                                                                                                                  |                                                                                                                              |                                                                                                                                                                                                                                                                                                                                |      |
| 21 |                                         |                                                           |                      |                               |   |                                                                                                                                                        |                                                                                                                                                                                  |                                                                                                                              |                                                                                                                                                                                                                                                                                                                                |      |
| 22 |                                         |                                                           |                      |                               |   |                                                                                                                                                        |                                                                                                                                                                                  |                                                                                                                              |                                                                                                                                                                                                                                                                                                                                |      |
| 23 |                                         |                                                           |                      |                               |   |                                                                                                                                                        |                                                                                                                                                                                  |                                                                                                                              |                                                                                                                                                                                                                                                                                                                                |      |
| 24 |                                         |                                                           |                      |                               |   |                                                                                                                                                        |                                                                                                                                                                                  |                                                                                                                              |                                                                                                                                                                                                                                                                                                                                |      |
| 25 |                                         |                                                           |                      |                               |   |                                                                                                                                                        |                                                                                                                                                                                  |                                                                                                                              |                                                                                                                                                                                                                                                                                                                                |      |
| 26 | Stewart et<br>al. 2000 <sup>41</sup>    | Observational<br>Cohort study,<br>315 patients,<br>Canada | Primary care         | General                       | P | Patient-centred<br>communication (Assessment<br>of audiotape and Patient-<br>Centered Communication<br>Score tool)                                     | Discomfort (VAS)<br>symptom severity<br>severity (Visual<br>Analogue Scale), Health<br>Status (Short Form-36<br>SF-36) Quality of care<br>provision (Chart review<br>by doctors) | Symptom discomfort & concern,<br>self-reported health, diagnostic<br>tests, referrals, and visits to the<br>family physician | None                                                                                                                                                                                                                                                                                                                           | 5/2  |
| 27 |                                         |                                                           |                      |                               |   |                                                                                                                                                        |                                                                                                                                                                                  |                                                                                                                              |                                                                                                                                                                                                                                                                                                                                |      |
| 28 |                                         |                                                           |                      |                               |   |                                                                                                                                                        |                                                                                                                                                                                  |                                                                                                                              |                                                                                                                                                                                                                                                                                                                                |      |
| 29 |                                         |                                                           |                      |                               |   |                                                                                                                                                        |                                                                                                                                                                                  |                                                                                                                              |                                                                                                                                                                                                                                                                                                                                |      |
| 30 |                                         |                                                           |                      |                               |   |                                                                                                                                                        |                                                                                                                                                                                  |                                                                                                                              |                                                                                                                                                                                                                                                                                                                                |      |
| 31 |                                         |                                                           |                      |                               |   |                                                                                                                                                        |                                                                                                                                                                                  |                                                                                                                              |                                                                                                                                                                                                                                                                                                                                |      |
| 32 |                                         |                                                           |                      |                               |   |                                                                                                                                                        |                                                                                                                                                                                  |                                                                                                                              |                                                                                                                                                                                                                                                                                                                                |      |
| 33 |                                         |                                                           |                      |                               |   |                                                                                                                                                        |                                                                                                                                                                                  |                                                                                                                              |                                                                                                                                                                                                                                                                                                                                |      |
| 34 | Kinnersley et<br>al. 1999 <sup>67</sup> | Observational<br>Study, 143<br>patients, UK               | Primary care         | Varied                        | P | Patient-centredness<br>(Assessment of audiotape<br>and questionnaires)                                                                                 | Symptom resolution,<br>resolution of concerns,<br>functional health status<br>(Questionnaire)                                                                                    | None                                                                                                                         | Resolution of<br>symptoms,<br>resolution of<br>concerns,<br>functional health<br>status                                                                                                                                                                                                                                        | 0/3  |
| 35 |                                         |                                                           |                      |                               |   |                                                                                                                                                        |                                                                                                                                                                                  |                                                                                                                              |                                                                                                                                                                                                                                                                                                                                |      |
| 36 |                                         |                                                           |                      |                               |   |                                                                                                                                                        |                                                                                                                                                                                  |                                                                                                                              |                                                                                                                                                                                                                                                                                                                                |      |
| 37 |                                         |                                                           |                      |                               |   |                                                                                                                                                        |                                                                                                                                                                                  |                                                                                                                              |                                                                                                                                                                                                                                                                                                                                |      |
| 38 |                                         |                                                           |                      |                               |   |                                                                                                                                                        |                                                                                                                                                                                  |                                                                                                                              |                                                                                                                                                                                                                                                                                                                                |      |
| 39 |                                         |                                                           |                      |                               |   |                                                                                                                                                        |                                                                                                                                                                                  |                                                                                                                              |                                                                                                                                                                                                                                                                                                                                |      |
| 40 |                                         |                                                           |                      |                               |   |                                                                                                                                                        |                                                                                                                                                                                  |                                                                                                                              |                                                                                                                                                                                                                                                                                                                                |      |
| 41 |                                         |                                                           |                      |                               |   |                                                                                                                                                        |                                                                                                                                                                                  |                                                                                                                              |                                                                                                                                                                                                                                                                                                                                |      |
| 42 |                                         |                                                           |                      |                               |   |                                                                                                                                                        |                                                                                                                                                                                  |                                                                                                                              |                                                                                                                                                                                                                                                                                                                                |      |
| 43 |                                         |                                                           |                      |                               |   |                                                                                                                                                        |                                                                                                                                                                                  |                                                                                                                              |                                                                                                                                                                                                                                                                                                                                |      |
| 44 |                                         |                                                           |                      |                               |   |                                                                                                                                                        |                                                                                                                                                                                  |                                                                                                                              |                                                                                                                                                                                                                                                                                                                                |      |
| 45 |                                         |                                                           |                      |                               |   |                                                                                                                                                        |                                                                                                                                                                                  |                                                                                                                              |                                                                                                                                                                                                                                                                                                                                |      |
| 46 |                                         |                                                           |                      |                               |   |                                                                                                                                                        |                                                                                                                                                                                  |                                                                                                                              |                                                                                                                                                                                                                                                                                                                                |      |
| 47 |                                         |                                                           |                      |                               |   |                                                                                                                                                        |                                                                                                                                                                                  |                                                                                                                              |                                                                                                                                                                                                                                                                                                                                |      |
| 48 |                                         |                                                           |                      |                               |   |                                                                                                                                                        |                                                                                                                                                                                  |                                                                                                                              |                                                                                                                                                                                                                                                                                                                                |      |
| 49 |                                         |                                                           |                      |                               |   |                                                                                                                                                        |                                                                                                                                                                                  |                                                                                                                              |                                                                                                                                                                                                                                                                                                                                |      |

|    |                                    |                                          |                                     |                                                                                              |   |                                                                                                                                                 |                                                                                                                                                              |                                                                                                                                                                                           |                                    |      |
|----|------------------------------------|------------------------------------------|-------------------------------------|----------------------------------------------------------------------------------------------|---|-------------------------------------------------------------------------------------------------------------------------------------------------|--------------------------------------------------------------------------------------------------------------------------------------------------------------|-------------------------------------------------------------------------------------------------------------------------------------------------------------------------------------------|------------------------------------|------|
| 1  |                                    |                                          |                                     |                                                                                              |   |                                                                                                                                                 |                                                                                                                                                              |                                                                                                                                                                                           |                                    |      |
| 2  |                                    |                                          |                                     |                                                                                              |   |                                                                                                                                                 |                                                                                                                                                              |                                                                                                                                                                                           |                                    |      |
| 3  |                                    |                                          |                                     |                                                                                              |   |                                                                                                                                                 |                                                                                                                                                              |                                                                                                                                                                                           |                                    |      |
| 4  |                                    |                                          |                                     |                                                                                              |   |                                                                                                                                                 |                                                                                                                                                              |                                                                                                                                                                                           |                                    |      |
| 5  | Solberg et al. 2008 <sup>50</sup>  | Survey, 3109 patients, US                | Primary care - multispecialty group | Varied                                                                                       | P | Patient experience of errors (Survey)                                                                                                           | Review of errors (Chart audits and physician reviewer judgements)                                                                                            | None                                                                                                                                                                                      | None                               | 1/0  |
| 6  |                                    |                                          |                                     |                                                                                              |   |                                                                                                                                                 |                                                                                                                                                              |                                                                                                                                                                                           |                                    |      |
| 7  |                                    |                                          |                                     |                                                                                              |   |                                                                                                                                                 |                                                                                                                                                              |                                                                                                                                                                                           |                                    |      |
| 8  | Isaac et al. 2010 <sup>45</sup>    | Cross-sectional study, 927 hospitals, US | Hospital                            | Acute myocardial infarction, congestive heart failure, pneumonia complications from surgery. | O | General patient experiences (Hospital Consumer Assessment of Healthcare Providers and Systems survey (HCAHPS))                                  | Processes of care (Health Quality Alliance (HQA) database) and Patient Safety Indicators                                                                     | Decubitus ulcer rates, infections, processes of care for pneumonia, CHF and myocardial infarctions, surgical composites, hemorrhage, respiratory failure, DVT, pulmonary embolism, sepsis | Failure to rescue                  | 11/1 |
| 9  |                                    |                                          |                                     |                                                                                              |   |                                                                                                                                                 |                                                                                                                                                              |                                                                                                                                                                                           |                                    |      |
| 10 |                                    |                                          |                                     |                                                                                              |   |                                                                                                                                                 |                                                                                                                                                              |                                                                                                                                                                                           |                                    |      |
| 11 |                                    |                                          |                                     |                                                                                              |   |                                                                                                                                                 |                                                                                                                                                              |                                                                                                                                                                                           |                                    |      |
| 12 |                                    |                                          |                                     |                                                                                              |   |                                                                                                                                                 |                                                                                                                                                              |                                                                                                                                                                                           |                                    |      |
| 13 |                                    |                                          |                                     |                                                                                              |   |                                                                                                                                                 |                                                                                                                                                              |                                                                                                                                                                                           |                                    |      |
| 14 |                                    |                                          |                                     |                                                                                              |   |                                                                                                                                                 |                                                                                                                                                              |                                                                                                                                                                                           |                                    |      |
| 15 | Glickman et al. 2010 <sup>25</sup> | Cohort Study, 3562 patients, US          | Hospital                            | Acute myocardial infarction                                                                  | P | Patient satisfaction (Press-Ganey survey)                                                                                                       | Adherence to practice guidelines, outcomes (CRUSADE quality improvement registry).                                                                           | Inpatient mortality, composite clinical measures, AMI survival                                                                                                                            | None                               | 3/0  |
| 16 |                                    |                                          |                                     |                                                                                              |   |                                                                                                                                                 |                                                                                                                                                              |                                                                                                                                                                                           |                                    |      |
| 17 |                                    |                                          |                                     |                                                                                              |   |                                                                                                                                                 |                                                                                                                                                              |                                                                                                                                                                                           |                                    |      |
| 18 |                                    |                                          |                                     |                                                                                              |   |                                                                                                                                                 |                                                                                                                                                              |                                                                                                                                                                                           |                                    |      |
| 19 | Fremont et al. 2001 <sup>68</sup>  | Survey, 1346 patients, US                | Hospital                            | Cardiac                                                                                      | P | Patient centred care (Picker survey)                                                                                                            | Processes of care, functional health status, cardiac symptoms (Medical Outcomes Study questionnaire, London School of Hygiene measures for cardiac symptoms) | Overall health, chest pain, patient reported general physical and mental health status                                                                                                    | Mental health, shortness of breath | 5/2  |
| 20 |                                    |                                          |                                     |                                                                                              |   |                                                                                                                                                 |                                                                                                                                                              |                                                                                                                                                                                           |                                    |      |
| 21 |                                    |                                          |                                     |                                                                                              |   |                                                                                                                                                 |                                                                                                                                                              |                                                                                                                                                                                           |                                    |      |
| 22 |                                    |                                          |                                     |                                                                                              |   |                                                                                                                                                 |                                                                                                                                                              |                                                                                                                                                                                           |                                    |      |
| 23 |                                    |                                          |                                     |                                                                                              |   |                                                                                                                                                 |                                                                                                                                                              |                                                                                                                                                                                           |                                    |      |
| 24 |                                    |                                          |                                     |                                                                                              |   |                                                                                                                                                 |                                                                                                                                                              |                                                                                                                                                                                           |                                    |      |
| 25 |                                    |                                          |                                     |                                                                                              |   |                                                                                                                                                 |                                                                                                                                                              |                                                                                                                                                                                           |                                    |      |
| 26 |                                    |                                          |                                     |                                                                                              |   |                                                                                                                                                 |                                                                                                                                                              |                                                                                                                                                                                           |                                    |      |
| 27 | Riley et al. 2007 <sup>69</sup>    | Survey, 506 patients, Canada             | Hospital                            | Cardiac care - acute coronary                                                                | P | Continuity of care (The Heart Continuity of Care Questionnaire, Medical Outcome Study Social Support Survey, Illness Perception Questionnaire ) | Participation in cardiac rehabilitation, perception of illness, functional capacity (Duke Activity Status Index (DASI))                                      | Cardiac rehabilitation participation, perceptions of illness consequences                                                                                                                 | None                               | 2/0  |
| 28 |                                    |                                          |                                     |                                                                                              |   |                                                                                                                                                 |                                                                                                                                                              |                                                                                                                                                                                           |                                    |      |
| 29 |                                    |                                          |                                     |                                                                                              |   |                                                                                                                                                 |                                                                                                                                                              |                                                                                                                                                                                           |                                    |      |
| 30 |                                    |                                          |                                     |                                                                                              |   |                                                                                                                                                 |                                                                                                                                                              |                                                                                                                                                                                           |                                    |      |
| 31 |                                    |                                          |                                     |                                                                                              |   |                                                                                                                                                 |                                                                                                                                                              |                                                                                                                                                                                           |                                    |      |
| 32 |                                    |                                          |                                     |                                                                                              |   |                                                                                                                                                 |                                                                                                                                                              |                                                                                                                                                                                           |                                    |      |
| 33 | Weingart et al. 2005 <sup>48</sup> | Cohort study, 228 patients, US           | Hospital                            | Varied                                                                                       | P | Patient experience of adverse events (Interviews)                                                                                               | Adverse events (Medical records and patient interviews)                                                                                                      | Adverse events                                                                                                                                                                            | None                               | 1/0  |
| 34 |                                    |                                          |                                     |                                                                                              |   |                                                                                                                                                 |                                                                                                                                                              |                                                                                                                                                                                           |                                    |      |
| 35 |                                    |                                          |                                     |                                                                                              |   |                                                                                                                                                 |                                                                                                                                                              |                                                                                                                                                                                           |                                    |      |
| 36 | Weissman et al. 2008 <sup>49</sup> | Survey, 998 patients, US                 | Hospital                            | Varied                                                                                       | P | Patient experience of adverse events (Interviews)                                                                                               | Adverse events (Medical records)                                                                                                                             | Adverse events                                                                                                                                                                            | None                               | 1/0  |
| 37 |                                    |                                          |                                     |                                                                                              |   |                                                                                                                                                 |                                                                                                                                                              |                                                                                                                                                                                           |                                    |      |
| 38 |                                    |                                          |                                     |                                                                                              |   |                                                                                                                                                 |                                                                                                                                                              |                                                                                                                                                                                           |                                    |      |
| 39 |                                    |                                          |                                     |                                                                                              |   |                                                                                                                                                 |                                                                                                                                                              |                                                                                                                                                                                           |                                    |      |
| 40 |                                    |                                          |                                     |                                                                                              |   |                                                                                                                                                 |                                                                                                                                                              |                                                                                                                                                                                           |                                    |      |
| 41 |                                    |                                          |                                     |                                                                                              |   |                                                                                                                                                 |                                                                                                                                                              |                                                                                                                                                                                           |                                    |      |
| 42 |                                    |                                          |                                     |                                                                                              |   |                                                                                                                                                 |                                                                                                                                                              |                                                                                                                                                                                           |                                    |      |
| 43 |                                    |                                          |                                     |                                                                                              |   |                                                                                                                                                 |                                                                                                                                                              |                                                                                                                                                                                           |                                    |      |
| 44 |                                    |                                          |                                     |                                                                                              |   |                                                                                                                                                 |                                                                                                                                                              |                                                                                                                                                                                           |                                    |      |
| 45 |                                    |                                          |                                     |                                                                                              |   |                                                                                                                                                 |                                                                                                                                                              |                                                                                                                                                                                           |                                    |      |
| 46 |                                    |                                          |                                     |                                                                                              |   |                                                                                                                                                 |                                                                                                                                                              |                                                                                                                                                                                           |                                    |      |
| 47 |                                    |                                          |                                     |                                                                                              |   |                                                                                                                                                 |                                                                                                                                                              |                                                                                                                                                                                           |                                    |      |
| 48 |                                    |                                          |                                     |                                                                                              |   |                                                                                                                                                 |                                                                                                                                                              |                                                                                                                                                                                           |                                    |      |
| 49 |                                    |                                          |                                     |                                                                                              |   |                                                                                                                                                 |                                                                                                                                                              |                                                                                                                                                                                           |                                    |      |

Table 7: Systematic reviews

| Authors                             | Timespan & studies meeting inclusion criteria | Health care setting | Disease areas covered                                                                                   | Unit of analysis | Patient experience focus (and measurement methods)                                        | Safety & effectiveness measure - association demonstrated -                                                                                                                                                                                                                                                                      | Safety & effectiveness measure - association NOT demonstrated                                                                                                              | Assoc found vs not found |
|-------------------------------------|-----------------------------------------------|---------------------|---------------------------------------------------------------------------------------------------------|------------------|-------------------------------------------------------------------------------------------|----------------------------------------------------------------------------------------------------------------------------------------------------------------------------------------------------------------------------------------------------------------------------------------------------------------------------------|----------------------------------------------------------------------------------------------------------------------------------------------------------------------------|--------------------------|
| Blasi et al. 2001 <sup>70</sup>     | 1974-1998, 4 out of 25                        | Range of settings   | Asthma, hypertension, cancer, insomnia, menopause, obesity, tonsillitis                                 | P                | Provider behaviour and communication (Grading of consultations)                           | Health status, symptom improvement, treatment effectiveness, fear of injection, anxiety, ratings of pain, number of doctor visits, pain, speed of recovery                                                                                                                                                                       | Comfort, recovery time, return visits                                                                                                                                      | 9/3                      |
| Drotar 2009 <sup>27</sup>           | 1998-2008, 4 out of 22                        | Range of settings   | Asthma, cystic fibrosis, diabetes, epilepsy, inflammatory bowel disease, juvenile rheumatoid arthritis  | P                | Physician and staff behavior (Surveys, interviews, medical records)                       | Treatment adherence, compliance, office visits, phone calls, hospitalizations                                                                                                                                                                                                                                                    | Medication adherence                                                                                                                                                       | 5/1                      |
| Hall et al. 2010 <sup>71</sup>      | 1990-2009, 10 out of 14                       | Range of settings   | Brain injury, musculoskeletal conditions, cardiac conditions, trauma, back, neck and shoulder pain      | P                | Therapist-patient relationship, therapeutic alliance (Surveys, audio/video taped session) | Adherence, employment status, physical training, therapeutic success, perceived effect of treatment, pain, physical function, depression, general health status, attendance, floor-bench lifts, global assessment scores, ability to perform ADLs, mobility                                                                      | Weekly physical training, disability, productivity, depression, functional status, adherence                                                                               | 18/6                     |
| Stevenson et al. 2004 <sup>72</sup> | 1991-2000, 7 out of 134                       | Range of settings   | Hypertension, asthma, chronic obstructive pulmonary disorder, ovarian cancer, epilepsy, hyperlipidaemia | P                | Doctor-patient communication (Surveys)                                                    | Self-reported adherence, blood pressure control, GP practice visits, hospitalizations, emergency room visits for children with asthma, quality of life for COPD patients, oral contraceptive adherence, adherence to anti-epileptic drugs, pain control following gynaecological surgery, adherence to medication for depression | Length of visits to doctor for asthma patients, health status and use of health care services for epilepsy patients, adherence to Niacin and bile acid sequestrant therapy | 9/5                      |

1  
2  
3  
4  
5  
6  
7  
8  
9  
10  
11  
12  
13  
14  
15  
16  
17  
18  
19  
20  
21  
22  
23  
24  
25  
26  
27  
28  
29  
30  
31  
32  
33  
34  
35  
36  
37  
38  
39  
40  
41  
42  
43  
44  
45  
46  
47  
48  
49

For Peer Review Only

|                                          |                                          |                   |                            |   |                                                                                                                                       |                                                                                                                                                                                                                                                                                                                                                                                                                                                                                                                                                                     |                                                                                                                                                                                                                                                                                                                                                                                                                  |       |
|------------------------------------------|------------------------------------------|-------------------|----------------------------|---|---------------------------------------------------------------------------------------------------------------------------------------|---------------------------------------------------------------------------------------------------------------------------------------------------------------------------------------------------------------------------------------------------------------------------------------------------------------------------------------------------------------------------------------------------------------------------------------------------------------------------------------------------------------------------------------------------------------------|------------------------------------------------------------------------------------------------------------------------------------------------------------------------------------------------------------------------------------------------------------------------------------------------------------------------------------------------------------------------------------------------------------------|-------|
| Saultz & Lochner 2005 <sup>43</sup>      | 1967-2002, X out of 41 (CATHAL TO CHECK) | Range of settings | Varied                     | P | Continuity of care -ongoing relationship between individual doctor &patient (Surveys, continuity of care index)                       | Hospitalization rate, hospital readmission, length of stay, influenza immunization, preventive care, antibiotic compliance, ICU days, Neonatal morbidity, Apgar score, Birth weight, Rates and timeliness of childhood immunizations, health-related quality of life, recommended diabetes care measures, glucose control, PAP tests, mammogram rate, breast exams, surgical operation rates, hypertension control, presence of depression, relationship problems, adverse events in hospitalized patients, degree of patient enablement, rheumatic fever incidence | Diabetes (HbA1C, lipid control, blood pressure control, presence of diabetic complications), blood glucose control, functional ability of elderly patients, compliance with antibiotic therapy, well-child visits, blood pressure checks in women, pregnancy complications, newborn mortality, immunization rates, NICU admissions, Apgar scores, caesarean rate, length of labor, indications for tonsillectomy | 51/30 |
| Hall & Roter & Katz 1988 <sup>73</sup>   | Meta-analysis 41 studies                 | Range of settings | Varied                     | P | Clinician-patient communication (Surveys, interviews, observations, assessment of video or audio)                                     | Compliance (with 4 variables of PE), recall/understanding (with 4 variables of PE)                                                                                                                                                                                                                                                                                                                                                                                                                                                                                  | Compliance (with 1 variable of PE), recall/understanding (with 1 variable of PE)                                                                                                                                                                                                                                                                                                                                 | 8/2   |
| Jackson, C. et al. 2010 <sup>39</sup>    | 1984-2008, 3 out of 17                   | Range of settings | Inflammatory bowel disease | P | Trust in physician, Patient-physician agreement, adequacy information (Surveys)                                                       | Adherence to treatment                                                                                                                                                                                                                                                                                                                                                                                                                                                                                                                                              | Compliance                                                                                                                                                                                                                                                                                                                                                                                                       | 2/1   |
| Sans-Corralles et al. 2006 <sup>42</sup> | 1984-2005, 9 out of 20                   | Primary care      | No specific disease focus  | P | Continuity of care, coordination of care, consultation time, doctor-patient relationship (Validated tools in these different domains) | Hospital admissions, length of stay, compliance, recovery from discomfort, emotional health, diagnostic tests, referrals, quality of care for asthma, diabetes and angina, symptom burden, receipt of preventive services                                                                                                                                                                                                                                                                                                                                           | Enablement                                                                                                                                                                                                                                                                                                                                                                                                       | 13/1  |
| Hsiao & Boulton 2008 <sup>44</sup>       | 1984-2003, 3 out of 14                   | Primary care      | No specific disease focus  | P | Continuity with physician (Surveys, interviews, medical records, chart reviews)                                                       | Hospitalisations for all conditions and ambulatory care-sensitive conditions, odds of hospitalisation(2), health care costs(2), emergency department visits, emergent hospital admissions(2), length of stay, diabetes recognition, mental health(2), pain, perception of health, well-being, BMI, triglyceride concentrations, recovery, clinical outcomes, self-reported health                                                                                                                                                                                   | Acute ambulatory care-sensitive conditions, mobility, pain, emotion, activities of daily living, smoking, BMI, hypertension, hypercholesterolemia, self-reported health, glycemic control, diabetes control, frequency of hypoglycemic reactions, blood sugar, weight                                                                                                                                            | 21/15 |

1  
2  
3  
4  
5  
6  
7  
8  
9  
10  
11  
12  
13  
14  
15  
16  
17  
18  
19  
20  
21  
22  
23  
24  
25  
26  
27  
28  
29  
30  
31  
32  
33  
34  
35  
36  
37  
38  
39  
40  
41  
42  
43  
44  
45  
46  
47  
48  
49

|                                         |                                                   |                   |                                                                                                                                                                              |   |                                                                                        |                                                                                                                                                                                                                                                                                                                                                                                                                                                                                                                      |                                     |       |
|-----------------------------------------|---------------------------------------------------|-------------------|------------------------------------------------------------------------------------------------------------------------------------------------------------------------------|---|----------------------------------------------------------------------------------------|----------------------------------------------------------------------------------------------------------------------------------------------------------------------------------------------------------------------------------------------------------------------------------------------------------------------------------------------------------------------------------------------------------------------------------------------------------------------------------------------------------------------|-------------------------------------|-------|
| Arbuthnott et al. 2009 <sup>28</sup>    | Meta analysis, 1955-2007, All 48 studies included | Range of settings | Asthma, bacterial infection, fibromyalgia, diabetes, renal disease, hypertension, congestive heart failure, inflammatory bowel disease, breast cancer, HIV, and tuberculosis | P | Physician-patient collaboration (Observation, surveys)                                 | Medication adherence, behavioural adherence                                                                                                                                                                                                                                                                                                                                                                                                                                                                          | Appointment adherence               | 2/1   |
| Stewart 1995 <sup>74</sup>              | 1983-1993, 21 studies                             | Range of settings | Peptic ulcers, breast cancer, diabetes, hypertension, headache, coronary artery disease, gingivitis, tuberculosis, prostate cancer                                           | P | Physician-patient communication (Surveys, evaluation of audio- or videotape recording) | Peptic ulcer physical limitation, blood glucose levels, blood pressure, headache resolution, physician evaluation of symptom resolution for coronary artery disease, gingivitis and tuberculosis, anxiety level in gynecological care, radiation therapy, breast cancer care, functional status following radiation therapy for prostate cancer, anxiety after radiation therapy, pain levels and hospital length of stay after intra-abdominal surgery, physical and psychological complaints in breast cancer care | Details not included                | 16/5  |
| Zolnierok & DiMatteo 2009 <sup>26</sup> | Meta analysis 1949-2008, 127 studies              | Range of settings | No specific disease focus                                                                                                                                                    | P | Physician-patient communication (Observation, surveys)                                 | Adherence to treatment recommended by clinician                                                                                                                                                                                                                                                                                                                                                                                                                                                                      | Adherence (2 observational studies) | 125/2 |
| Beck et al. 2002 <sup>75</sup>          | 1975-2000, 5 out of 14                            | Primary care      | No specific disease focus                                                                                                                                                    | P | Physician-patient communication (Observation, evaluation of audio and video tapes)     | Compliance with doctors' advice, blood pressure, pill count                                                                                                                                                                                                                                                                                                                                                                                                                                                          | None                                | 10/0  |
| Cabana & Lee 2004 <sup>20</sup>         | 1966-2002, 7 out of 18                            | Range of settings | Rheumatoid arthritis, epilepsy, breast cancer, cervical cancer, diabetes                                                                                                     | P | Continuity of care (Validated measures of continuity e.g. SCOC)                        | Hospitalizations, length of stay, emergency department visits, intensive care days, preventive medicine visits, drug or alcohol abuse, outpatient attendance, glucose control for adults with diabetes                                                                                                                                                                                                                                                                                                               | None                                | 18/5  |
| Richards et al. 2006 <sup>76</sup>      | 1997-2002, 2 out of 33                            | Range of settings | Psoriasis                                                                                                                                                                    | P | Patient's perception of care, satisfaction, interpersonal skills (Surveys, interviews) | Treatment adherence, medication use                                                                                                                                                                                                                                                                                                                                                                                                                                                                                  | None                                | 2/0   |

## References

1. Institute of Medicine. *Crossing the Quality Chasm: a new health system for the 21st century*. Washington DC: National Academy Press, 2001.
2. Black N., Jenkinson C. Measuring patients experiences and outcomes. *BMJ* 2009;339.
3. Department of Health. *Liberating the NHS: Transparency in outcomes – a framework for the NHS*: Department of Health, 2010.
4. Darzi A. *High Quality Care For All – NHS Next Stage Review Final Report*: Department of Health 2008.
5. Department of Health. *Using the Commissioning for Quality and Innovation (CQUIN) payment framework*, 2008.
6. Berwick DM. What "Patient-Centered" Should Mean: Confessions Of An Extremist. *Health Affairs* 2009;28(4):w555-w65.
7. Street RL, Makoul G, Arora NK, Epstein RM. How does communication heal? Pathways linking clinician-patient communication to health outcomes. *Patient education and counseling* 2009;74(3):295-301.
8. Thom DH, Hall MA, Pawlson LG. Measuring Patients' Trust In Physicians When Assessing Quality Of Care. *Health Affairs* 2004;23(4):124-32.
9. Vincent CA, Coulter A. Patient safety: what about the patient? *Quality and Safety in Health Care* 2002;11(1):76-80.
10. Coulter A. *Engaging patients in healthcare*. Maidenhead Open University Press 2011.
11. Rathert C, Huddleston N, Pak Y. Acute care patients discuss the patient role in patient safety. *Health Care Management Review*;36(2):134-44  
10.1097/HMR.0b013e318208cd31.
12. Picker Institute. *Patient experience surveys: the rationale* Picker Institute Europe, 2008.
13. NICE. *Patient experience in adult NHS services: improving the experience of care for people using adult NHS services*: NICE, 2011.
14. López L., Weissman JS., Schneider EC., Weingart SN., Cohen AP., AM. E. Disclosure of hospital adverse events and its association with patients' ratings of the quality of care. *Arch Intern Med* 2009;169(20).
15. Safran DG., Taira DA., Rogers WH., Kosinski M., Ware JE., Tarlov AR. Linking primary care performance to outcomes of care. *Journal of Family Practice* 1998;47:213-20.
16. Robert Wood Johnson Foundation. *Good for Health, Good for Business: The Case for Measuring Patient Experience of Care*: The Center for Health Care Quality at the George Washington University Medical Center
17. Greenhalgh T., Peacock R. Effectiveness and efficiency of search methods in systematic reviews of complex evidence: audit of primary sources. *BMJ* 2005;331(7524):1064-65.
18. Fuertes J, Boylan L, Fontanella J. Behavioral Indices in Medical Care Outcome: The Working Alliance, Adherence, and Related Factors. *Journal of General Internal Medicine* 2009;24(1):80-85.
19. Raiz LR, Kilty KM, Henry ML, Ferguson RM. Medication Compliance Following Renal Transplantation. *Transplantation* 1999;68(1):51-55.
20. Cabana M., Jee S. Does continuity of care improve patient outcomes? *The Journal of Family Practice* 2004;53(12).
21. Plomondon M, Magid D, Masoudi F, Jones P, Barry L, Havranek E, et al. Association Between Angina and Treatment Satisfaction after Myocardial Infarction. *Journal of General Internal Medicine* 2008;23(1):1-6.
22. Jha AK, Orav EJ, Zheng J, Epstein AM. Patients' Perception of Hospital Care in the United States. *New England Journal of Medicine* 2008;359(18):1921-31.

- 1
- 2
- 3 23. Kaplan SH, Greenfield S, Ware JE. Assessing the effects of physician-patient interactions
- 4 on the outcomes of chronic disease. *Medical Care* 1989;27(3, Suppl):S110-S27.
- 5 24. Meterko M, Wright S, Lin H, Lowy E, Cleary PD. Mortality among Patients with Acute
- 6 Myocardial Infarction: The Influences of Patient-Centered Care and Evidence-Based
- 7 Medicine. *Health Services Research* 2010;45(5p1):1188-204.
- 8 25. Glickman SW, Boulding W, Manary M, Staelin R, Roe MT, Wolosin RJ, et al. Patient
- 9 Satisfaction and Its Relationship With Clinical Quality and Inpatient Mortality in
- 10 Acute Myocardial Infarction. *Circulation: Cardiovascular Quality and*
- 11 *Outcomes*;3(2):188-95.
- 12 26. Zolnierok H. KB, DiMatteo MR. Physician Communication and Patient Adherence to
- 13 Treatment: A Meta-Analysis. *Medical Care* 2009;47(8):826-34
- 14 10.1097/MLR.0b013e31819a5acc.
- 15 27. Drotar D. Physician Behavior in the Care of Pediatric Chronic Illness: Association With
- 16 Health Outcomes and Treatment Adherence. *Journal of Developmental & Behavioral*
- 17 *Pediatrics* 2009;30(3):246-54 10.1097/DBP.0b013e3181a7ed42.
- 18 28. Arbutnott A, Sharpe D. The effect of physician-patient collaboration on patient
- 19 adherence in non-psychiatric medicine. *Patient education and counseling*
- 20 2009;77(1):60-67.
- 21 29. Lewis ET, Combs A, Trafton JA. Reasons for Under-Use of Prescribed Opioid
- 22 Medications by Patients in Pain. *Pain Medicine* 2010;11(6):861-71.
- 23 30. Kahn KL, Schneider EC, Malin JL, Adams JL, Epstein AM. Patient Centered
- 24 Experiences in Breast Cancer: Predicting Long-Term Adherence to Tamoxifen Use.
- 25 *Medical Care* 2007;45(5):431-39 10.1097/01.mlr.0000257193.10760.7f.
- 26 31. Schneider EC, Zaslavsky AM, Landon BE, Lied TR, Sheingold S, Cleary PD. National
- 27 Quality Monitoring of Medicare Health Plans: The Relationship Between Enrollees'
- 28 Reports and the Quality of Clinical Care. *Medical Care* 2001;39(12):1313-25.
- 29 32. Schoenthaler A, Chaplin WF, Allegrante JP, Fernandez S, Diaz-Gloster M, Tobin JN, et
- 30 al. Provider communication effects medication adherence in hypertensive African
- 31 Americans. *Patient Education and Counseling* 2009;75(2):185-91.
- 32 33. Heisler M, Bouknight RR, Hayward RA, Smith DM, Kerr EA. The Relative Importance
- 33 of Physician Communication, Participatory Decision Making, and Patient
- 34 Understanding in Diabetes Self-management. *Journal of General Internal Medicine*
- 35 2002;17(4):243-52.
- 36 34. Haynes RB, Ackloo E, Sahota N, McDonald HP, X. Y. Interventions for enhancing
- 37 medication adherence. *Cochrane Database Syst Rev* 2008.
- 38 35. Sequist et al. Quality Monitoring of Physicians: Linking Patients' Experiences of Care to
- 39 Clinical Quality and Outcomes. *Journal of General Internal Medicine* 2008;23(11).
- 40 36. Flocke SA, Stange KC, Zyzanski SJ. The Association of Attributes of Primary Care With
- 41 the Delivery of Clinical Preventive Services. *Medical Care* 1998;36(8):AS21-AS30.
- 42 37. O'Malley AS, Sheppard VB, Schwartz M, Mandelblatt J. The role of trust in use of
- 43 preventive services among low-income African-American women. *Preventive*
- 44 *Medicine: An International Journal Devoted to Practice and Theory* 2004;38(6):777-
- 45 85.
- 46 38. Carcaise-Edinboro P, Bradley CJ. Influence of Patient-Provider Communication on
- 47 Colorectal Cancer Screening. *Medical Care* 2008;46(7):738-45
- 48 10.1097/MLR.0b013e318178935a.
- 49 39. Jackson CA, Clatworthy J, Robinson A, Horne R. Factors Associated With Non-
- 50 Adherence to Oral Medication for Inflammatory Bowel Disease: A Systematic
- 51 Review. *Am J Gastroenterol* 2010;105(3):525-39.
- 52
- 53
- 54
- 55
- 56
- 57
- 58
- 59
- 60



- 1
  - 2
  - 3
  - 4
  - 5
  - 6
  - 7
  - 8
  - 9
  - 10
  - 11
  - 12
  - 13
  - 14
  - 15
  - 16
  - 17
  - 18
  - 19
  - 20
  - 21
  - 22
  - 23
  - 24
  - 25
  - 26
  - 27
  - 28
  - 29
  - 30
  - 31
  - 32
  - 33
  - 34
  - 35
  - 36
  - 37
  - 38
  - 39
  - 40
  - 41
  - 42
  - 43
  - 44
  - 45
  - 46
  - 47
  - 48
  - 49
  - 50
  - 51
  - 52
  - 53
  - 54
  - 55
  - 56
  - 57
  - 58
  - 59
  - 60
40. Clark NM, Cabana MD, Nan B, Gong ZM, Shish KK, Birk NA, et al. The Clinician-Patient Partnership Paradigm: Outcomes Associated With Physician Communication Behavior. *Clinical Pediatrics* 2008;47(1):49-57.
41. Stewart M., Brown J., Donner A., McWhinney I., Oates J., Weston W., et al. The Impact of Patient-Centered Care on Outcomes. *Journal of Family Practice* 2000;49(9).
42. Sans-Corrales M, Pujol-Ribera E, GenÃ©-Badia J, PasarÃ©n-Rua MI, Iglesias-PÃ©rez Ba, Casajuana-Brunet J. Family medicine attributes related to satisfaction, health and costs. *Family Practice* 2006;23(3):308-16.
43. Saultz JW, Lochner J. Interpersonal Continuity of Care and Care Outcomes: A Critical Review. *The Annals of Family Medicine* 2005;3(2):159-66.
44. Hsiao C-J, Boulton C. Effects of Quality on Outcomes in Primary Care: A Review of the Literature. *American Journal of Medical Quality* 2008;23(4):302-10.
45. Isaac T, Zaslavsky AM, Cleary PD, Landon BE. The Relationship between Patients' Perception of Care and Measures of Hospital Quality and Safety. *Health Services Research* 2010;45(4):1024-40.
46. Rao M, Clarke A., Sanderson C., Hammersley R. Patients' Own Assessments of Quality of Primary Care Compared with Objective Records Based Measures of Technical Quality of Care: Cross Sectional Study. *BMJ* 2006;333(7797).
47. Chang JT, Hays RD, Shekelle PG, MacLean CH, Solomon DH, Reuben DB, et al. Patients' global ratings of their health care are not associated with the technical quality of their care. *Ann Intern Med* 2006;145(8):635-6.
48. Weingart SN, Pagovich O, Sands DZ, Li JM, Aronson MD, Davis RB, et al. What Can Hospitalized Patients Tell Us About Adverse Events? Learning from Patient-Reported Incidents. *Journal of General Internal Medicine* 2005;20(9):830-36.
49. Weissman JS, Schneider EC, Weingart SN, Epstein AM, David-Kasdan J, Feibelmann S, et al. Comparing Patient-Reported Hospital Adverse Events with Medical Record Review: Do Patients Know Something That Hospitals Do Not? *Annals of Internal Medicine* 2008;149(2):100-08.
50. Solberg LI, Asche SE, Averbach BM, Hayek AM, Schmitt KG, Lindquist TC, et al. Can Patient Safety Be Measured by Surveys of Patient Experiences? *Joint Commission Journal on Quality and Patient Safety* 2008;34(5):266-74.
51. O'Connor AM, Bennett CL, Stacey D, Barry M, Col NF, Eden KB, et al. Decision aids for people facing health treatment or screening decisions. *Cochrane database of systematic reviews (Online)* 2009(3):CD001431.
52. Mumford E, Schlesinger HJ, Glass GV. The effect of psychological intervention on recovery from surgery and heart attacks: an analysis of the literature. *American Journal of Public Health* 1982;72(2):141-51.
53. Begg C., Berlin J., N. J., . Publication Bias: A Problem in Interpreting Medical Data *Journal of the Royal Statistical Society. Series A (Statistics in Society)* 1988;151(3).
54. Burgers JS, Voerman GE, Grol R, Faber MJ, Schneider EC. Quality and Coordination of Care for Patients With Multiple Conditions: Results From an International Survey of Patient Experience. *Evaluation & the Health Professions* 2010;33(3):343-64.
55. Vincent C. Understanding and Responding to Adverse Events. *New England Journal of Medicine* 2003;348(11):1051-56.
56. Agoritsas T, Bovier PA, Perneger TV. Patient Reports of Undesirable Events During Hospitalization. *Journal of General Internal Medicine* 2005;20(10):922-28.
57. Jackson JL, Chamberlin J, Kroenke K. Predictors of patient satisfaction. *Social Science & Medicine* 2001;52(4).



- 1  
2  
3 58. Safran DG., Miller W., Beckman H. Organizational Dimensions of Relationship-centred  
4 care. *Journal of General Internal Medicine* 2005;21:S9-15.
- 5 59. Alamo MMo, Moral RR, PÃ©rula de Torres LA. Evaluation of a patient-centred  
6 approach in generalized musculoskeletal chronic pain/fibromyalgia patients in  
7 primary care. *Patient education and counseling* 2002;48(1):23-31.
- 8 60. Fan VS, Reiber GE, Diehr P, Burman M, McDonell MB, Fihn SD. Functional Status and  
9 Patient Satisfaction. *Journal of General Internal Medicine* 2005;20(5):452-59.
- 10 61. Little P., Everitt H., Williamson I., Warner G., Moore M., Gould C., et al. Observational  
11 study of effect of patient centredness and positive approach on outcomes of general  
12 practice consultations. *BMJ* 2001;323(7318):908-11.
- 13 62. Levinson W, Roter DL, Mullooly JP, Dull VT, Frankel RM. Physician-Patient  
14 Communication: The Relationship With Malpractice Claims Among Primary Care  
15 Physicians and Surgeons. *JAMA: The Journal of the American Medical Association*  
16 1997;277(7):553-59.
- 17 63. Slatore, Christopher G, Cecere, Laura M, Reinke, Lynn F, et al. *Patient-Clinician*  
18 *Communication: Associations With Important Health Outcomes Among Veterans*  
19 *With COPD*. Northbrook, IL, ETATS-UNIS: American College of Chest Physicians,  
20 2010.
- 21 64. Lee Y-Y, Lin JL. The effects of trust in physician on self-efficacy, adherence and  
22 diabetes outcomes. *Social Science & Medicine* 2009;68(6):1060-68.
- 23 65. Lee Y-Y, Lin JL. Do patient autonomy preferences matter? Linking patient-centered care  
24 to patient-physician relationships and health outcomes. *Social Science & Medicine*  
25 2010;71(10):1811-18.
- 26 66. Kennedy A, Nelson E, Reeves D, Richardson G, Roberts C, Robinson A, et al. A  
27 randomised controlled trial to assess the impact of a package comprising a patient-  
28 orientated, evidence-based self-help guidebook and patient-centred consultations on  
29 disease management and satisfaction in inflammatory bowel disease. *Health*  
30 *technology assessment (Winchester, England)* 2003;7(28):iii, 1-113.
- 31 67. Kinnersley P, Stott N, Peters TJ, Harvey I. The patient-centredness of consultations and  
32 outcome in primary care. *British Journal of General Practice* 1999;49(446):711-16.
- 33 68. Fremont A, Cleary P, Hargraves J, Rowe R, Jacobson N, Ayanian J. Patient-centered  
34 processes of care and long-term outcomes of myocardial infarction. *Journal of*  
35 *General Internal Medicine* 2001;16(12):800-08.
- 36 69. Riley DL, Stewart DE, Grace SL. Continuity of cardiac care: Cardiac rehabilitation  
37 participation and other correlates. *International Journal of Cardiology*  
38 2007;119(3):326-33.
- 39 70. Blasi ZD, Harkness E, Ernst E, Georgiou A, Kleijnen J. Influence of context effects on  
40 health outcomes: a systematic review. *The Lancet* 2001;357(9258):757-62.
- 41 71. Hall AM, Ferreira PH, Maher CG, Latimer J, Ferreira ML. The Influence of the  
42 Therapist-Patient Relationship on Treatment Outcome in Physical Rehabilitation: A  
43 Systematic Review. *Physical Therapy* 2010;90(8):1099-110.
- 44 72. Stevenson FA, Cox K, Britten N, Dundar Y. A systematic review of the research on  
45 communication between patients and health care professionals about medicines: the  
46 consequences for concordance. *Health Expectations* 2004;7(3):235-45.
- 47 73. Hall JA, Roter DL, Katz NR. Meta-analysis of correlates of provider behavior in medical  
48 encounters. *Medical Care* 1988;26(7):657-75.
- 49 74. Stewart MA. Effective physician-patient communication and health outcomes: a review.  
50 *Canadian Medical Association Journal* 1995;152(9):1423-33.
- 51  
52  
53  
54  
55  
56  
57  
58  
59  
60

- 1  
2  
3 75. Beck RS, Daughtridge R, Sloane PD. Physician-patient communication in the primary  
4 care office: a systematic review. *The Journal of the American Board of Family*  
5 *Practice* 2002;15(1):25-38.  
6  
7 76. Richards HL, Fortune DG, Griffiths CEM. Adherence to treatment in patients with  
8 psoriasis. *Journal of the European Academy of Dermatology and Venereology*  
9 2006;20(4):370-79.  
10  
11  
12  
13  
14  
15  
16  
17  
18  
19  
20  
21  
22  
23  
24  
25  
26  
27  
28  
29  
30  
31  
32  
33  
34  
35  
36  
37  
38  
39  
40  
41  
42  
43  
44  
45  
46  
47  
48  
49  
50  
51  
52  
53  
54  
55  
56  
57  
58  
59  
60

|                             |                                                                                                                                                                                                                                                                                                                                                                                                                                                                                                                                                                                                                                                                                                                                                                                |
|-----------------------------|--------------------------------------------------------------------------------------------------------------------------------------------------------------------------------------------------------------------------------------------------------------------------------------------------------------------------------------------------------------------------------------------------------------------------------------------------------------------------------------------------------------------------------------------------------------------------------------------------------------------------------------------------------------------------------------------------------------------------------------------------------------------------------|
| <b>Title</b>                | A review of evidence on the links between patient experience and clinical safety and effectiveness                                                                                                                                                                                                                                                                                                                                                                                                                                                                                                                                                                                                                                                                             |
| <b>Authors</b>              | <p>Cathal Doyle- Program Lead for Evaluation, NIHR CLAHRC for North West<sup>1</sup><br/>         Laura Lennox- Research Assistant, NIHR CLAHRC for North West London<sup>1</sup><br/>         and Imperial College London<sup>2</sup><br/>         Derek Bell- Professor of Acute Medicine, NIHR CLAHRC for North West<br/>         London<sup>1</sup> and Imperial College London<sup>2</sup></p> <p><sup>1,2</sup> Chelsea and Westminster Hospital, 369 Fulham Road, London, SW10<br/>         9NH, UK</p>                                                                                                                                                                                                                                                                 |
| <b>Corresponding Author</b> | <p>Name: Cathal Doyle<br/>         Address: CLAHRC NWL, Floor 4 Lift Bank D, Chelsea &amp; Westminster Hospital,<br/>         369 Fulham Road, London, SW10 9NH, UK<br/>         Email: c.doyle@imperial.ac.uk<br/>         Telephone (office): 0203 315 3392</p> <p>"The Corresponding Author has the right to grant on behalf of all authors<br/>         and does grant on behalf of all authors, an exclusive licence (or non<br/>         exclusive for government employees) on a worldwide basis to the BMJ<br/>         Publishing Group Ltd to permit this article (if accepted) to be published in<br/>         BMJ editions and any other BMJ PGL products and sublicences such use and<br/>         exploit all subsidiary rights, as set out in our licence."</p> |
| <b>Keywords:</b>            | Health & safety, Quality in healthcare, Health policy, Patient experience,<br>Patient safety                                                                                                                                                                                                                                                                                                                                                                                                                                                                                                                                                                                                                                                                                   |
| <b>Word Count</b>           | 2521                                                                                                                                                                                                                                                                                                                                                                                                                                                                                                                                                                                                                                                                                                                                                                           |

## Abstract

Objective: To explore evidence on the links between patient experience and clinical safety and effectiveness outcomes.

Design: Systematic review

Setting: A wide range of settings within primary and secondary care including hospitals and primary care centres.

Participants: A wide range of demographic groups and age groups.

Primary and secondary outcome measures: A broad range of safety and effectiveness outcomes including mortality, physical symptoms, length of stay and adherence to treatment.

Results: 55 articles met the inclusion criteria for this review. The evidence indicates consistent associations between patient experience, safety and effectiveness for a wide range of disease areas, settings, outcome measures and study designs. Evidence demonstrates associations between patient experience and self-rated and objectively measured health outcomes; adherence to recommended clinical practice and medication); preventive care (such as health-promoting behavior, use of screening services and immunization; and resource use (such as hospitalization, length of stay and primary care visits). There is some evidence of associations between patient experience and measures of the technical quality of care and adverse events. While some areas would benefit from further research, overall the count of associations found outweigh those not found.

Conclusion: The data presented shows associations between patient experience and clinical effectiveness and safety and supports the case for the inclusion of patient experience as one of the central pillars of quality in health care. It suggests that improvement of patient experience will increase the likelihood of improvements in the other two domains and supports the argument that the three measures should be looked at as a group and not in isolation. Clinicians should resist sidelining patient experience measures as too subjective or mood-orientated, divorced from the 'real' clinical work of measuring safety and effectiveness.

Trial registration: This review was not registered.

## Article Summary

### Article focus:

- Should patient experience, as advocated by the Institute of Medicine and the NHS Outcomes Framework, be seen as one of the pillars of quality in health care alongside clinical safety and effectiveness?
- What aspects of patient experience can be linked to health and safety outcomes?
- What evidence is available on the links between patient experience and clinical safety and effectiveness outcomes?

### Key Messages:

- The results show that patient experience is consistently associated with patient safety and clinical effectiveness across a wide range of disease areas, study designs, settings, population groups and outcome measures.
- Patient experience is associated with: self-rated and objectively measured health outcomes; adherence to recommended medication and treatments; preventive care such as use of screening services and immunizations; healthcare resource use such as hospitalization and primary care visits; the technical quality of care delivery and adverse events
- Improvement to patient experience may increase the likelihood of improvements in clinical outcomes and patient safety.

### Strengths and limitations of this study:

- This study demonstrates an approach to designing a systematic review for the 'catch-all' term patient experience, and brings together evidence from a variety of sources that may otherwise remain dispersed.
- This was a time-limited review and there is scope to expand this search based on the results and broaden the search terms to uncover further evidence.

## Introduction

Patient experience is increasingly recognized as one of three pillars of quality in healthcare alongside safety and clinical effectiveness.<sup>1</sup> In the NHS the measurement of patient experience data to identify strengths and weaknesses of health care delivery, drive quality improvement, inform commissioning and promote patient choice is now mandatory.<sup>2 3 4</sup> In addition to data on harm avoidance or success rates for treatments, providers are now assessed on aspects of care such as dignity and respect, compassion and involvement in care decisions.<sup>4</sup> In England these data are published in Quality Accounts and the Commissioning for Quality & Innovation (CQUINs) payment framework makes a proportion of care providers' income conditional on improvement in this domain.<sup>5</sup>

The inclusion of patient experience as a pillar of quality is often justified on the grounds of its intrinsic value – that the expectation of humane, empathic care is a given and requires no further justification. It is also justified on more utilitarian grounds as a means of improving safety and effectiveness.<sup>6 7</sup> For example, clear information, empathic, two-way communication and respect for patients' beliefs and concerns could lead to patients being more informed and involved in decision making and create an environment where patients are more willing to disclose information. Patients could have more 'ownership' of clinical decisions, entering a 'therapeutic alliance' with clinicians. This could support improved and more timely diagnosis, clinical decisions and advice and lead to fewer unnecessary referrals or diagnostic tests.<sup>8 9</sup> Increased patient agency can encourage greater participation in personal care and compliance with medication, adherence to recommended treatment, monitoring of prescriptions and dose.<sup>10 9</sup> Patients can be informed about what to expect from treatment and be motivated to report adverse events or complications and keep a list of their medical histories, allergies, and current medications.<sup>11</sup>

Patients' direct experience of care process through clinical encounters or as an observer (for example, as a patient on a hospital ward) can provide valuable insights into everyday care. Examples include attention to pain control, assistance with bathing or help with feeding, or the environment (cleanliness, noise, physical safety) or coordination of care between professions or organizations. Given the organizational fragmentation of much healthcare care and the numerous services with which many patients interact, the measurement of patient experience may help provide a 'whole system' perspective not readily available from more discrete safety and effectiveness measures.<sup>11</sup>

Focusing on such utilitarian arguments, this study reviews evidence on links that have been demonstrated between patient experience and safety and effectiveness.

## Methods

### *Identifying variables relevant to patient experience*

Patient experience is a term that encapsulates a number of dimensions and in preliminary database searches this phrase on its own uncovered a limited number of studies. To broaden and structure the search for evidence, identify search terms and provide a framework for analysis it was necessary to identify what patient experience entails and outline potential pathways through which it is proposed to impact on safety and effectiveness. As such, we combined common elements from patient experience frameworks produced by The Institute of Medicine<sup>1</sup>, Picker Institute<sup>12</sup> and NICE<sup>13</sup>.

Table 1 delineates different dimensions of patient experience and distinguishes between 'relational' and 'functional' aspects. Relational aspects refer to interpersonal aspects of care – the ability of clinicians to empathise, respect the preferences of patients, include them in decision making and

provide information to enable self-care.<sup>10</sup> It also refers to patients' expectations that professionals will put their interest above other considerations and be honest and transparent when something goes wrong.<sup>8 14</sup> Functional aspects relate to basic expectations about how care is delivered, such as attention to physical needs, timeliness of care, clean and safe environments, effective coordination between professionals and continuity.

**Table 1: Identifying aspects of patient experience and search terms**

| <b>Relational aspects</b>                                                                                                                                                                          | <b>Functional aspects</b>                                                                               |
|----------------------------------------------------------------------------------------------------------------------------------------------------------------------------------------------------|---------------------------------------------------------------------------------------------------------|
| Emotional and psychological support, relieving fear and anxiety, treated with respect, kindness, dignity, compassion, understanding                                                                | Effective treatment delivered by trusted professionals                                                  |
| Participation of patient in decisions and respect and understanding for beliefs, values, concerns, preferences and their understanding of their condition                                          | Timely, tailored and expert management of physical symptoms                                             |
| Involvement of, and support for family and carers in decisions                                                                                                                                     | Attention to physical support needs and environmental needs (e.g. clean, safe, comfortable environment) |
| Clear, comprehensible information and communication tailored to patient needs to support informed decision (awareness of available options, risks and benefits of treatments) and enable self-care | Coordination and continuity of care; smooth transitions from one setting to another                     |
| Transparency, honesty, disclosure when something goes wrong                                                                                                                                        |                                                                                                         |

Using these frameworks and discursive documents in this area of research<sup>10 15 16 9</sup> as a guide we identified words and phrases commonly used to denote aspects of patient experience, examples of which are listed in Table 2.

**Table 2: Search terms denoting patient experience:**

patient-centred care; patient engagement; clinical interaction; patient-clinician; clinician-patient; patient-doctor; doctor-patient; physician-patient; patient-physician; patient-provider; interpersonal treatment; physician discussion; trust in physician; empathy; compassion; respect; responsiveness; patient preferences; shared decision making; therapeutic alliance; participation in decisions; decision making; autonomy; caring; kindness; dignity; honesty; participation; right to decide; physical comfort; involvement (of family, carers, friends); emotional support; continuity (of care); smooth transition; emotional support;



1  
2  
3  
4  
5 These were combined with search terms representing patient safety and effectiveness outcomes  
6 hypothesized to be associated with patient experience in discursive literature. We searched for a  
7 broad range of outcome measures, including both self-rated and 'objective' measurements of health  
8 status, physical and mental health and wellbeing, the use of preventive health services, compliance  
9 or adherence to health-promoting behavior and resource use.  
10

11  
12 Combining these two sets of search terms in the EMBASE database, we identified 5323 papers  
13 whose abstracts were then reviewed. If deemed relevant the full article was retrieved to assess  
14 whether it met the inclusion criteria.  
15

16 Given concerns about the sole use of protocol-driven search strategies for complex evidence<sup>17</sup> we  
17 combined this search with a 'snowballing' method, pursuing references of references, citations and  
18 'related articles' functions in PubMed for those articles identified in the initial search.  
19

#### 20 *Inclusion criteria, assessment of quality and categorisation of evidence*

21 We included studies that measured associations between patients' reporting of their experience  
22 and safety and effectiveness outcomes. These included studies measuring associations between  
23 experience and outcomes at either at a patient level (i.e data on both types of variables for the same  
24 patients) or at an organizational level (i.e. associations between aggregated patient measures of  
25 experience and outcomes for the same type of organisation such as a hospital or primary care  
26 practice). (TEXT REMOVED ...We excluded studies of interventions to improve aspects of relevance  
27 to patient experience, although we refer to some of this evidence in the discussion).  
28  
29

30 We included studies where the variables denoting both patient experience and safety and  
31 effectiveness were measured in a credible way, through the use of validated tools. For patient  
32 experience variables these include surveys covering several aspects of experience (such as Picker  
33 Surveys and the Hospital Consumer Assessment of Healthcare Providers and Systems survey) and  
34 specific aspects (such as a 'Working Alliance Scale'<sup>18</sup>, Multidimensional Health Locus of Control  
35 Scale (MHLC) scale<sup>19</sup> or usual provider continuity (UPC) index<sup>20</sup>). For safety and effectiveness these  
36 include, for example, generic health and quality of life surveys (such as Short-Form 36 (SF36)),  
37 disease-specific surveys (such as the Seattle Angina Questionnaire<sup>21</sup>) measures of the technical  
38 quality of care (such as the Hospital Quality Alliance (HQA) score, reviews of medical records and  
39 care provider data. <sup>22</sup> Details of the methods used to measure both variables in each study are  
40 included in Tables 6 and 7.)  
41  
42

43 We included studies where the sample size of patients or organizations appeared sufficiently large  
44 to conduct meaningful statistical analysis (excluding studies with fewer than 50 subjects) and took  
45 account of differences in perspectives between demographic groups. When extracting data relevant  
46 to our study from systematic reviews we selected only those studies that met these criteria.  
47  
48

49 We then counted both associations found and not found for each study. Associations refer to cases  
50 where one measure of patient experience (typically an overall rating of patient experience for a care  
51 provider) has a statistically significant association with one or more effectiveness or safety variable.  
52 If a study showed associations between several aspects of patient experience that appeared to be  
53 closely related (for example, 'listening', 'empathy', or 'respect') and an aspect of effectiveness or  
54 safety, this was counted as one association found. This was to avoid exaggerating the weight of the  
55 evidence by 'over counting' associations.  
56  
57  
58  
59  
60



Two main types of studies emerged in the search – those focusing on interventions to improve aspects of patient experience and those exploring associations between patient experience variables and safety and effectiveness variables. To manage the scope of this time-limited review we decided to restrict analysis of the large number of interventions to the evidence contained within systematic reviews.

(TEXT REMOVED) Table 2 presents evidence in order of patient experience focus, distinguishing between those articles with a broad focus (looking at both ‘relational and functional’ aspects outlined in Figure 1) and those focusing on a single aspect. Within these categories, studies are then presented in order of breadth of disease focus and then by study design (with systematic reviews presented first).

Overall, the evidence indicates associations between patient experience and safety and effectiveness that appear consistent across a range of disease areas, study designs, settings, population groups and outcome measures. Associations found outweigh those not found by 429 to 127. Of the four studies where evidence against associations outweigh evidence for associations there is no suggestion that these are methodologically superior.

Table 3 shows surveys to be the predominant method used to measure variables for individual studies.

**Table 3: Methods used to measure variables**

|                                                                   | No of studies |
|-------------------------------------------------------------------|---------------|
| <b>Patient experience variables</b>                               |               |
| Survey                                                            | 31            |
| Interviews                                                        | 2             |
| Medical records                                                   | 1             |
| <b>Effectiveness &amp; safety variables</b>                       |               |
| Survey for self-rated healthcare                                  | 12            |
| Other survey                                                      | 14            |
| Medical records                                                   | 3             |
| Data monitoring quality of care delivery (e.g. audit, HQA, HEDIS) | 3             |
| Care provider outcome data                                        | 3             |
| Physical examination                                              | 1             |
| Patient interviews                                                | 2             |

Chart 1 outlines the disease areas covered. (Chart 1 inserted here)

Table 4 presents the frequency of associations categorized by type of outcomes (where a description was available). These include; objectively measured health outcomes (for example, 'mortality', 'blood glucose levels', 'infections', 'medical errors'); self-reported health and wellbeing outcomes (for example, 'health status', 'functional ability' 'quality of life', 'anxiety' ); adherence to recommended treatment and use of of preventive care services likely to improve health outcomes (for examples, 'medication compliance', 'adherence to treatment' and screening for a variety of conditions); outcomes related to healthcare resource use (for example 'hospitalizations', 'hospital readmission', 'emergency department use', 'primary care visits'); errors or adverse events and measures of the technical quality of care.

**Table 4: Associations categorised by type of outcome**

|                                      | Objective' health outcomes | Self-reported health and wellbeing | Adherence to treatment (including medication) | Preventive care | Healthcare resource use | Adverse events | Technical quality of care | All categories |
|--------------------------------------|----------------------------|------------------------------------|-----------------------------------------------|-----------------|-------------------------|----------------|---------------------------|----------------|
| <b>No. of associations found</b>     | 29                         | 61                                 | 152                                           | 24              | 31                      | 7              | 8                         | 312            |
| <b>No. of associations not found</b> | 11                         | 36                                 | 7                                             | 2               | 6                       | 0              | 4                         | 66             |

Table 5 shows associations categorised by type of care provider and for chronic conditions.

| <b>Table 5: Weight of evidence by provider and for chronic conditions</b> | Associations found | Associations not found |
|---------------------------------------------------------------------------|--------------------|------------------------|
| Primary care                                                              | 110                | 48                     |
| Hospital                                                                  | 43                 | 17                     |
| Chronic conditions                                                        | 53                 | 9                      |

Tables 6 and 7 present details of all studies identified, specifying the analytical focus of each study, methods to measure variables and associations found.

(TEXT AND PREVIOUS TABLE 3 REMOVED ?Table 3 outlines the range of outcome measures where associations with patient experience and outcomes related to safety and effectiveness were demonstrated. )

**Table 3: Outcomes related to safety and effectiveness demonstrated**

| <b>Category</b>  | <b>Associations demonstrated</b>                                   | <b>Count</b> |
|------------------|--------------------------------------------------------------------|--------------|
| <b>Adherence</b> | Adherence to/compliance with medications and recommended treatment | <b>16</b>    |

|                                  |                                                                                   |   |
|----------------------------------|-----------------------------------------------------------------------------------|---|
| Screening                        | Cancer screening, Cholesterol screening                                           | 8 |
| Symptoms                         | Symptom burden, discomfort & concern                                              | 7 |
| Hospitalization & Length of Stay | Hospitalization, length of stay                                                   | 6 |
| Doctor visits                    | Doctor visits, Well-child visits, Preventive visits, Prenatal visits              | 6 |
| Immunization                     | Use and timeliness of Immunization services - MMR vaccination, influenza          | 5 |
| Diabetes care                    | Diabetes self-management and adherence to recommended care, blood glucose control | 5 |
| Self reported health             | Self reported health and well-being                                               | 4 |
| Function                         | Functional status, physical function, physical mobility                           | 4 |
| Blood pressure                   | Blood pressure control, Hypertension control                                      | 3 |
| Pain                             | Pain levels                                                                       | 2 |
| Patient ability                  | Patient ability to deal with dyspnea, angina                                      | 2 |
| Mortality                        | Inpatient mortality, mortality                                                    | 2 |

(TEXT REMOVED – REPLACED WITH MORE DETAILED DISCUSSION BELOW) This review found numerous studies showing associations between patients' rating of their experience and adherence to medical treatment and advice, compliance with medication, symptom resolution and self-rated health. There is consistent evidence of better use of preventive services such as cancer screening and immunization. Some studies show an association with physical health outcome measures including blood pressure, blood glucose and mortality.

There is also evidence showing associations between patients' perspective or observations of processes of care and the technical quality and safety of care for the same population group recorded through other means. For example, two large-scale studies of hospitals in the US found patient experience measures associated with technical quality of care for myocardial infarction, congestive heart failure, pneumonia and complications from surgery. A similar study in primary care found associations between patient experience and processes of care related to prevention and disease management. Other studies comparing interviews with patients on their experience of individual adverse events with the official reporting of these same events by staff, found underreporting by healthcare providers.

Table 3 and 4 focus on studies where associations with safety and effectiveness were demonstrated. Not all studies demonstrated associations, but those showing associations between patient experience and the other two domains of quality outweigh those that don't. )

## Discussion

Overall, the evidence indicates associations between patient experience, safety and effectiveness that appears consistent across a range of disease areas, study designs and settings.

As Table 4 indicates, the evidence shows associations found outweigh those not found for both self-assessment of physical and mental health (61 vs 36) and 'objective' measures of health outcomes (e.g. where measures are taken by a clinician or by reviewing medical records) (29 vs 11). For objective measures, one study<sup>23</sup> shows associations for ulcer disease, hypertension and breast cancer. Two studies on myocardial infarction show associations with survival one year after discharge<sup>24</sup> and inpatient mortality.<sup>25</sup> Objective measurement is less frequently explored than self-rated health and is an area that could benefit from further research.

Evidence is strong in the case of adherence to recommended medical treatment. A meta-analysis included in this study showed associations between the quality of patient communications and adherence to medical treatment in 125 out of 127 studies analysed and showed the odds of patient adherence 1.62 times higher for physicians with communication training compared to those without.<sup>26</sup> Regarding compliance with medication, associations found outweigh those not found.<sup>19 27-33</sup> A review of interventions to increase adherence to medication (not included in this study) showed communication of information, good provider-patient relationships and patients' agreement with the need for treatment as common determinants of effectiveness.<sup>34</sup> There is evidence of better use of preventive services, such as screening services in diabetes, colorectal, breast and cervical cancer; cholesterol testing and immunization.<sup>23 35-38</sup> There is also evidence of impacts on resource use of primary and secondary care (such as hospitalizations, readmissions and primary care visits).<sup>20 27 39-44</sup>

For studies exploring associations between patient experience and technical quality of care measured by other means the evidence is mixed. Two studies in acute care (ADD REFS) showed associations between overall ratings of patient experience and ratings of the technical quality of care (using Hospital Quality Alliance (HQA) measures) for myocardial infarction, congestive heart failure, pneumonia and complications from surgery.<sup>22 45</sup> Another found an association with adherence to clinical guidelines for acute myocardial infarction.<sup>25</sup> A similar study in primary care found associations between patient experience of processes and measurement of care quality (from the HEDIS system measuring care quality for disease prevention and management in chronic conditions).<sup>35</sup> However, two other studies found no associations between patients' ratings and ratings based on an assessment of medical records.<sup>46 47</sup>

There is evidence showing associations between patients' perspective or observations of processes of care and the safety of care recorded through other means. Isaac (add ref) found associations between ratings of patient experience and six patient safety indicators (decubitus ulcer; failure to rescue; infections due to medical care; postoperative hemorrhage, respiratory failure, pulmonary embolism and sepsis). Two studies, examining evidence for patients' ability to identify medical errors or adverse events in hospital, showed associations between patients' accounts of their experience of adverse events and the documentation of events in medical records.<sup>48 49</sup> But another study shows only 2% of patient-reported errors were classified by medical reviewers as 'real clinical medical errors' with most 'reclassified' by clinicians as 'misunderstandings' or 'behaviour or communication problems'.<sup>50</sup> Overall there is less evidence available on safety compared to effectiveness and this should be a priority for future research in this area.

1  
2  
3 Research from other studies not included in this review support these findings. For example,  
4 research on 'decision aids' to ensure patients are well informed about their treatments and that  
5 decisions reflect the preferences of patients indicate that patient engagement has a beneficial  
6 impact on outcomes. For example, awareness of the risks of surgical procedures resulted in a 23%  
7 reduction in surgical interventions and better functional status.<sup>51</sup> Another review showed that  
8 provision of good information and emotional support are associated with better recovery from  
9 surgery and heart attacks.<sup>52</sup>  
10

### 11 **Study strengths and limitations**

12 This review builds on other studies<sup>9 10 15 16</sup> demonstrating links between these three domains. This  
13 study also demonstrates an approach to designing a systematic search for evidence for the 'catch-all'  
14 term patient experience, bringing together evidence from a variety of sources that may otherwise  
15 remain dispersed. This approach can be used or adapted for further research in this area.  
16

17  
18 This was a time-limited review and there is scope to expand this search based on our results. There  
19 may be scope to broaden the search terms and this may uncover further evidence. The first search  
20 was confined to one database and the review focused primarily on peer-reviewed literature  
21 excluding gray literature. **To manage the scope of this review we decided to restrict the analysis of**  
22 **interventions to improve patient experience to evidence within systematic reviews.** The suggested  
23 association between measures of patient experience and safety and effectiveness described does  
24 not entail causality. **Although all associations included in the study are statistically significant, the**  
25 **strength of associations vary. Due to time constraints and the heterogeneity of measures used we**  
26 **did not systematically compare the strengths of associations in different studies but this may be an**  
27 **area for future work.** As always, there may be a publication bias in favour of studies showing  
28 positive associations between patient experience variables and safety and effectiveness outcomes<sup>53</sup>  
29 In addition, most studies were conducted in the United States and caution is needed about their  
30 applicability to other healthcare systems.  
31  
32

33 Although there are areas that would benefit from further research, the data presented  
34 supports the view that patient experience data, robustly collected and analysed, may  
35 highlight strengths and risks in effectiveness and safety and that focusing on improving  
36 patient experience will increase the likelihood of improvements in the other two domains.  
37 There are aspects of patient experience that will help to explain performance in safety and  
38 effectiveness and vice-versa.  
39  
40

### 41 **Conclusion**

42 The evidence suggests that attention to these various dimensions of patient-centred care  
43 outlined in Table 1 may result in important clinical benefits **and more effective use of health**  
44 **care resources, particularly for chronic conditions, where most healthcare resources are**  
45 **consumed.** There is also some evidence to suggest that patients can be used as partners in  
46 identifying poor and unsafe practice and help enhance quality and safety.  
47  
48

49  
50 This supports the argument that the three measures should be looked at as a group and not  
51 in isolation. Clinicians should resist sidelining patient experience measures as too subjective  
52 or mood-orientated, divorced from the 'real' clinical work of measuring and delivering  
53 safety and effectiveness.  
54  
55  
56  
57  
58  
59  
60

Table 6: Individual studies

| Author                            | Type of study, sample size, country        | Setting                   | Disease focus                                                                                  | Unit of analysis (Patient (P) or org (O)) | Patient experience focus and method used -                                                                                                                                   | Safety & effectiveness measure -                                                                                                                     | Association demonstrated                                                                                                                                                                                             | Association NOT demonstrated                                                           | Assoc. Found vs NOT found |
|-----------------------------------|--------------------------------------------|---------------------------|------------------------------------------------------------------------------------------------|-------------------------------------------|------------------------------------------------------------------------------------------------------------------------------------------------------------------------------|------------------------------------------------------------------------------------------------------------------------------------------------------|----------------------------------------------------------------------------------------------------------------------------------------------------------------------------------------------------------------------|----------------------------------------------------------------------------------------|---------------------------|
| Chang et al. 2006 <sup>47</sup>   | Cohort study, 236 patients, US             | Managed care organisation | 22 clinical conditions                                                                         | P                                         | Providers communication (The Consumer Assessment of Healthcare Providers and Systems survey and 'Quality of care')                                                           | Technical quality and patient global ratings (Medical records and patient interviews)                                                                | None                                                                                                                                                                                                                 | Technical quality of care                                                              | 0/1                       |
| Sequist et al. 2008 <sup>35</sup> | Cross-sectional study, 492 settings, US    | Primary care              | Cervical, breast and colorectal cancer, chlamydia, cardiovascular conditions, asthma, diabetes | P                                         | Doctor-patient communication, clinical team interactions, organizational features of care (The Ambulatory Care Experiences Survey)                                           | Clinical quality focusing on disease prevention, disease management and outcomes of care (Healthcare Effectiveness Data and Information Set (HEDIS)) | Cervical cancer, breast cancer and colorectal cancer screening, Chlamydia screening, Cholesterol screening (cardiac), LDL cholesterol testing (diabetes), eye exams (diabetes), HbA1c testing, nephropathy screening | Cholesterol management, HbA1c control, LDL cholesterol control, blood pressure control | 9/4                       |
| Burgers et al. 2010 <sup>54</sup> | Survey, 8973 patients, Range               | Range of settings         | Chronic lung, mental health, hypertension, heart disease, diabetes, arthritis, cancer.         | P                                         | Coordination of care and overall experience (Commonwealth Fund International Health Policy Survey)                                                                           | Morbidity score                                                                                                                                      | Morbidity score                                                                                                                                                                                                      | None                                                                                   | 1/0                       |
| Kaplan et al. 1989 <sup>23</sup>  | Randomised control trial, 252 patients, US | Range of settings         | Ulcer disease, hypertension, diabetes, breast cancer                                           | P                                         | Physician-patient communication (Assessment of audio tape and questionnaire)                                                                                                 | Physiologic measures taken at visit and patients' self-rated health status survey.                                                                   | Follow up blood glucose and blood pressure, functional health status, self reported health status.                                                                                                                   | None                                                                                   | 4/0                       |
| Jha et al. 2008 <sup>22</sup>     | Cross-sectional study, 2429 settings, US   | Hospital                  | Acute myocardial infarction, congestive heart failure, pneumonia complications from surgery.   | O                                         | Patient communication with clinicians, experience of nursing services, discharge planning (Hospital Consumer Assessment of Healthcare Providers and Systems (HCAHPS) survey) | Technical quality of care using Hospital Quality Alliance (HQA) score                                                                                | Technical quality of care in AMI, CHF, pneumonia, surgical care                                                                                                                                                      | None                                                                                   | 4/0                       |

|    |                                       |                                                   |                                 |                                     |   |                                                                                                                                                                                                          |                                                                                                                                        |                                                                                                                                  |                                                             |     |
|----|---------------------------------------|---------------------------------------------------|---------------------------------|-------------------------------------|---|----------------------------------------------------------------------------------------------------------------------------------------------------------------------------------------------------------|----------------------------------------------------------------------------------------------------------------------------------------|----------------------------------------------------------------------------------------------------------------------------------|-------------------------------------------------------------|-----|
| 1  |                                       |                                                   |                                 |                                     |   |                                                                                                                                                                                                          |                                                                                                                                        |                                                                                                                                  |                                                             |     |
| 2  |                                       |                                                   |                                 |                                     |   |                                                                                                                                                                                                          |                                                                                                                                        |                                                                                                                                  |                                                             |     |
| 3  |                                       |                                                   |                                 |                                     |   |                                                                                                                                                                                                          |                                                                                                                                        |                                                                                                                                  |                                                             |     |
| 4  |                                       |                                                   |                                 |                                     |   |                                                                                                                                                                                                          |                                                                                                                                        |                                                                                                                                  |                                                             |     |
| 5  | Rao et al. 2006 <sup>46</sup>         | Cross sectional study, 3487 patients, UK          | Primary care                    | Hypertension, Influenza vaccination | P | Older patients' experience of technical quality of care (General Practice Assessment survey)                                                                                                             | Technical quality of care - (medical records)                                                                                          | None                                                                                                                             | Hypertension monitoring and control, influenza vaccination. | 0/3 |
| 6  |                                       |                                                   |                                 |                                     |   |                                                                                                                                                                                                          |                                                                                                                                        |                                                                                                                                  |                                                             |     |
| 7  |                                       |                                                   |                                 |                                     |   |                                                                                                                                                                                                          |                                                                                                                                        |                                                                                                                                  |                                                             |     |
| 8  |                                       |                                                   |                                 |                                     |   |                                                                                                                                                                                                          |                                                                                                                                        |                                                                                                                                  |                                                             |     |
| 9  | Meterko et al. 2010 <sup>24</sup>     | Cohort study, 1858 patients, US                   | Veteran Affairs Medical Centres | Acute myocardial infarction         | P | Patient-centred care, access, courtesy, information, coordination, patient preferences, emotional support, family involvement, physical comfort (VA Survey of Healthcare Experiences of Patients (SHEP)) | Survival 1-year postdischarge                                                                                                          | Survival 1-year postdischarge                                                                                                    | None                                                        | 1/0 |
| 10 |                                       |                                                   |                                 |                                     |   |                                                                                                                                                                                                          |                                                                                                                                        |                                                                                                                                  |                                                             |     |
| 11 |                                       |                                                   |                                 |                                     |   |                                                                                                                                                                                                          |                                                                                                                                        |                                                                                                                                  |                                                             |     |
| 12 |                                       |                                                   |                                 |                                     |   |                                                                                                                                                                                                          |                                                                                                                                        |                                                                                                                                  |                                                             |     |
| 13 |                                       |                                                   |                                 |                                     |   |                                                                                                                                                                                                          |                                                                                                                                        |                                                                                                                                  |                                                             |     |
| 14 |                                       |                                                   |                                 |                                     |   |                                                                                                                                                                                                          |                                                                                                                                        |                                                                                                                                  |                                                             |     |
| 15 |                                       |                                                   |                                 |                                     |   |                                                                                                                                                                                                          |                                                                                                                                        |                                                                                                                                  |                                                             |     |
| 16 |                                       |                                                   |                                 |                                     |   |                                                                                                                                                                                                          |                                                                                                                                        |                                                                                                                                  |                                                             |     |
| 17 | Vincent et al. 1994 <sup>55</sup>     | Cohort Survey 227 patients, UK                    | Range of settings               | Varied                              | P | Accountability, explanation, standards of care, compensation (Questionnaire)                                                                                                                             | Legal action                                                                                                                           | Legal action                                                                                                                     | None                                                        | 1/0 |
| 18 |                                       |                                                   |                                 |                                     |   |                                                                                                                                                                                                          |                                                                                                                                        |                                                                                                                                  |                                                             |     |
| 19 |                                       |                                                   |                                 |                                     |   |                                                                                                                                                                                                          |                                                                                                                                        |                                                                                                                                  |                                                             |     |
| 20 |                                       |                                                   |                                 |                                     |   |                                                                                                                                                                                                          |                                                                                                                                        |                                                                                                                                  |                                                             |     |
| 21 |                                       |                                                   |                                 |                                     |   |                                                                                                                                                                                                          |                                                                                                                                        |                                                                                                                                  |                                                             |     |
| 22 | Agoritsas et al. 2005 <sup>56</sup>   | Cohort patient survey, 1518 patients, Switzerland | Hospital                        | Varied                              | P | Global rating of care and respect and dignity questions (Picker survey)                                                                                                                                  | Patient reports of undesirable events (survey)                                                                                         | Neglect of important information by health care staff, pain control, needless repetition of a test, being handled with roughness | None                                                        | 4/0 |
| 23 |                                       |                                                   |                                 |                                     |   |                                                                                                                                                                                                          |                                                                                                                                        |                                                                                                                                  |                                                             |     |
| 24 |                                       |                                                   |                                 |                                     |   |                                                                                                                                                                                                          |                                                                                                                                        |                                                                                                                                  |                                                             |     |
| 25 |                                       |                                                   |                                 |                                     |   |                                                                                                                                                                                                          |                                                                                                                                        |                                                                                                                                  |                                                             |     |
| 26 | Flocke et al. 1998 <sup>36</sup>      | Cross-sectional study, 2889 patients, US          | Primary care                    | Varied                              | P | Interpersonal communication, physician's knowledge of patient, coordination (Components of Primary Care Instrument (CPCI))                                                                               | Use of preventive care services (screening, health habit counseling services, immunization services)                                   | Screening, health habit counselling, immunization                                                                                | None                                                        | 3/0 |
| 27 |                                       |                                                   |                                 |                                     |   |                                                                                                                                                                                                          |                                                                                                                                        |                                                                                                                                  |                                                             |     |
| 28 |                                       |                                                   |                                 |                                     |   |                                                                                                                                                                                                          |                                                                                                                                        |                                                                                                                                  |                                                             |     |
| 29 |                                       |                                                   |                                 |                                     |   |                                                                                                                                                                                                          |                                                                                                                                        |                                                                                                                                  |                                                             |     |
| 30 |                                       |                                                   |                                 |                                     |   |                                                                                                                                                                                                          |                                                                                                                                        |                                                                                                                                  |                                                             |     |
| 31 |                                       |                                                   |                                 |                                     |   |                                                                                                                                                                                                          |                                                                                                                                        |                                                                                                                                  |                                                             |     |
| 32 | Jackson, J. et al. 2001 <sup>57</sup> | Quantitative Cohort study 500 patients, US        | General medicine walk-in clinic | Varied                              | P | Patient satisfaction (RAND 9-item survey)                                                                                                                                                                | Functional status (Medical Outcomes Study Short-Form Health Survey [SF-6]), symptom resolution, (RAND 9-item survey), follow-up visits | Symptom resolution, repeat visits, functional status                                                                             | None                                                        | 3/0 |
| 33 |                                       |                                                   |                                 |                                     |   |                                                                                                                                                                                                          |                                                                                                                                        |                                                                                                                                  |                                                             |     |
| 34 |                                       |                                                   |                                 |                                     |   |                                                                                                                                                                                                          |                                                                                                                                        |                                                                                                                                  |                                                             |     |
| 35 |                                       |                                                   |                                 |                                     |   |                                                                                                                                                                                                          |                                                                                                                                        |                                                                                                                                  |                                                             |     |
| 36 |                                       |                                                   |                                 |                                     |   |                                                                                                                                                                                                          |                                                                                                                                        |                                                                                                                                  |                                                             |     |
| 37 |                                       |                                                   |                                 |                                     |   |                                                                                                                                                                                                          |                                                                                                                                        |                                                                                                                                  |                                                             |     |
| 38 |                                       |                                                   |                                 |                                     |   |                                                                                                                                                                                                          |                                                                                                                                        |                                                                                                                                  |                                                             |     |
| 39 |                                       |                                                   |                                 |                                     |   |                                                                                                                                                                                                          |                                                                                                                                        |                                                                                                                                  |                                                             |     |
| 40 |                                       |                                                   |                                 |                                     |   |                                                                                                                                                                                                          |                                                                                                                                        |                                                                                                                                  |                                                             |     |
| 41 |                                       |                                                   |                                 |                                     |   |                                                                                                                                                                                                          |                                                                                                                                        |                                                                                                                                  |                                                             |     |
| 42 |                                       |                                                   |                                 |                                     |   |                                                                                                                                                                                                          |                                                                                                                                        |                                                                                                                                  |                                                             |     |
| 43 |                                       |                                                   |                                 |                                     |   |                                                                                                                                                                                                          |                                                                                                                                        |                                                                                                                                  |                                                             |     |
| 44 |                                       |                                                   |                                 |                                     |   |                                                                                                                                                                                                          |                                                                                                                                        |                                                                                                                                  |                                                             |     |
| 45 |                                       |                                                   |                                 |                                     |   |                                                                                                                                                                                                          |                                                                                                                                        |                                                                                                                                  |                                                             |     |
| 46 |                                       |                                                   |                                 |                                     |   |                                                                                                                                                                                                          |                                                                                                                                        |                                                                                                                                  |                                                             |     |
| 47 |                                       |                                                   |                                 |                                     |   |                                                                                                                                                                                                          |                                                                                                                                        |                                                                                                                                  |                                                             |     |
| 48 |                                       |                                                   |                                 |                                     |   |                                                                                                                                                                                                          |                                                                                                                                        |                                                                                                                                  |                                                             |     |
| 49 |                                       |                                                   |                                 |                                     |   |                                                                                                                                                                                                          |                                                                                                                                        |                                                                                                                                  |                                                             |     |

|    |                                     |                                             |                   |                       |   |                                                                                                                        |                                                                                                                                                                           |                                                                                                |      |     |
|----|-------------------------------------|---------------------------------------------|-------------------|-----------------------|---|------------------------------------------------------------------------------------------------------------------------|---------------------------------------------------------------------------------------------------------------------------------------------------------------------------|------------------------------------------------------------------------------------------------|------|-----|
| 1  |                                     |                                             |                   |                       |   |                                                                                                                        |                                                                                                                                                                           |                                                                                                |      |     |
| 2  |                                     |                                             |                   |                       |   |                                                                                                                        |                                                                                                                                                                           |                                                                                                |      |     |
| 3  |                                     |                                             |                   |                       |   |                                                                                                                        |                                                                                                                                                                           |                                                                                                |      |     |
| 4  |                                     |                                             |                   |                       |   |                                                                                                                        |                                                                                                                                                                           |                                                                                                |      |     |
| 5  | Clark et al. 2007 <sup>40</sup>     | Randomized control trial 731 patients, US   | Range of settings | Asthma                | P | Patient experience of physician communication (Patient interviews and Lickert Scale)                                   | Emergency department visits, hospitalizations, office phone calls and visits, urgent office visits (Survey + Medical chart review of 6% of patients to verify responses.) | Number of office visits, emergency visits, urgent office visits, phone calls, hospitalizations | None | 5/0 |
| 6  |                                     |                                             |                   |                       |   |                                                                                                                        |                                                                                                                                                                           |                                                                                                |      |     |
| 7  |                                     |                                             |                   |                       |   |                                                                                                                        |                                                                                                                                                                           |                                                                                                |      |     |
| 8  |                                     |                                             |                   |                       |   |                                                                                                                        |                                                                                                                                                                           |                                                                                                |      |     |
| 9  |                                     |                                             |                   |                       |   |                                                                                                                        |                                                                                                                                                                           |                                                                                                |      |     |
| 10 |                                     |                                             |                   |                       |   |                                                                                                                        |                                                                                                                                                                           |                                                                                                |      |     |
| 11 |                                     |                                             |                   |                       |   |                                                                                                                        |                                                                                                                                                                           |                                                                                                |      |     |
| 12 |                                     |                                             |                   |                       |   |                                                                                                                        |                                                                                                                                                                           |                                                                                                |      |     |
| 13 | Raiz et al. 1999 <sup>19</sup>      | Quantitative Cohort Study, 357 patients, US | Primary care      | Renal transplant      | P | Patient faith in doctor (Multidimensional Health Locus of Control Scale (MHLC))                                        | Medication compliance                                                                                                                                                     | Remembering medications, taking medications as prescribed                                      | None | 2/0 |
| 14 |                                     |                                             |                   |                       |   |                                                                                                                        |                                                                                                                                                                           |                                                                                                |      |     |
| 15 |                                     |                                             |                   |                       |   |                                                                                                                        |                                                                                                                                                                           |                                                                                                |      |     |
| 16 |                                     |                                             |                   |                       |   |                                                                                                                        |                                                                                                                                                                           |                                                                                                |      |     |
| 17 | Kahn et al. 2007 <sup>30</sup>      | Cohort study, 881 patients, US              | Hospitals         | Breast cancer         | P | Level of physician support, participation in decision-making and information on side effects (Survey)                  | Medication adherence                                                                                                                                                      | Ongoing tamoxifen use                                                                          | None | 1/0 |
| 18 |                                     |                                             |                   |                       |   |                                                                                                                        |                                                                                                                                                                           |                                                                                                |      |     |
| 19 |                                     |                                             |                   |                       |   |                                                                                                                        |                                                                                                                                                                           |                                                                                                |      |     |
| 20 |                                     |                                             |                   |                       |   |                                                                                                                        |                                                                                                                                                                           |                                                                                                |      |     |
| 21 | Plomondon et al. 2008 <sup>21</sup> | Cohort study, 1815 patients, US             | Hospital          | Myocardial infarction | P | Satisfaction with explanations from their doctor, overall satisfaction with treatment (Seattle Angina questionnaire)   | Presence of angina (Seattle Angina Questionnaire)                                                                                                                         | Presence of angina                                                                             | None | 1/0 |
| 22 |                                     |                                             |                   |                       |   |                                                                                                                        |                                                                                                                                                                           |                                                                                                |      |     |
| 23 |                                     |                                             |                   |                       |   |                                                                                                                        |                                                                                                                                                                           |                                                                                                |      |     |
| 24 |                                     |                                             |                   |                       |   |                                                                                                                        |                                                                                                                                                                           |                                                                                                |      |     |
| 25 |                                     |                                             |                   |                       |   |                                                                                                                        |                                                                                                                                                                           |                                                                                                |      |     |
| 26 | Fuertes et al. 2008 <sup>18</sup>   | Survey, 152 patients, US                    | Hospital          | Neurology             | P | Physician-patient communication, Physician-Patient Working Alliance, Empathy, Multicultural Competence (Questionnaire) | Adherence to medical treatment (Adherence Self-Efficacy Scale and Medical Outcome Study (MOS) Adherence Scale).                                                           | Adherence to treatment                                                                         | None | 1/0 |
| 27 |                                     |                                             |                   |                       |   |                                                                                                                        |                                                                                                                                                                           |                                                                                                |      |     |
| 28 |                                     |                                             |                   |                       |   |                                                                                                                        |                                                                                                                                                                           |                                                                                                |      |     |
| 29 |                                     |                                             |                   |                       |   |                                                                                                                        |                                                                                                                                                                           |                                                                                                |      |     |
| 30 |                                     |                                             |                   |                       |   |                                                                                                                        |                                                                                                                                                                           |                                                                                                |      |     |
| 31 |                                     |                                             |                   |                       |   |                                                                                                                        |                                                                                                                                                                           |                                                                                                |      |     |
| 32 | Lewis et al. 2010 <sup>29</sup>     | Qualitative cohort study, 191 patients, US  | Primary care      | Pain                  | P | Doctor-Patient Communication (Survey)                                                                                  | Medication adherence (Prescription Drug Use Questionnaire (PDUQ))                                                                                                         | Use of Prescribed Opioid Medications                                                           | None | 1/0 |
| 33 |                                     |                                             |                   |                       |   |                                                                                                                        |                                                                                                                                                                           |                                                                                                |      |     |
| 34 |                                     |                                             |                   |                       |   |                                                                                                                        |                                                                                                                                                                           |                                                                                                |      |     |
| 35 |                                     |                                             |                   |                       |   |                                                                                                                        |                                                                                                                                                                           |                                                                                                |      |     |
| 36 |                                     |                                             |                   |                       |   |                                                                                                                        |                                                                                                                                                                           |                                                                                                |      |     |
| 37 |                                     |                                             |                   |                       |   |                                                                                                                        |                                                                                                                                                                           |                                                                                                |      |     |
| 38 |                                     |                                             |                   |                       |   |                                                                                                                        |                                                                                                                                                                           |                                                                                                |      |     |
| 39 |                                     |                                             |                   |                       |   |                                                                                                                        |                                                                                                                                                                           |                                                                                                |      |     |
| 40 |                                     |                                             |                   |                       |   |                                                                                                                        |                                                                                                                                                                           |                                                                                                |      |     |
| 41 |                                     |                                             |                   |                       |   |                                                                                                                        |                                                                                                                                                                           |                                                                                                |      |     |
| 42 |                                     |                                             |                   |                       |   |                                                                                                                        |                                                                                                                                                                           |                                                                                                |      |     |
| 43 |                                     |                                             |                   |                       |   |                                                                                                                        |                                                                                                                                                                           |                                                                                                |      |     |
| 44 |                                     |                                             |                   |                       |   |                                                                                                                        |                                                                                                                                                                           |                                                                                                |      |     |
| 45 |                                     |                                             |                   |                       |   |                                                                                                                        |                                                                                                                                                                           |                                                                                                |      |     |
| 46 |                                     |                                             |                   |                       |   |                                                                                                                        |                                                                                                                                                                           |                                                                                                |      |     |
| 47 |                                     |                                             |                   |                       |   |                                                                                                                        |                                                                                                                                                                           |                                                                                                |      |     |
| 48 |                                     |                                             |                   |                       |   |                                                                                                                        |                                                                                                                                                                           |                                                                                                |      |     |
| 49 |                                     |                                             |                   |                       |   |                                                                                                                        |                                                                                                                                                                           |                                                                                                |      |     |



|    |                                     |                                          |              |                                                  |   |                                                                                                                                 |                                                                                                                                                                                                                    |                                                                                                                                                                                             |                                                                                                                                                    |      |
|----|-------------------------------------|------------------------------------------|--------------|--------------------------------------------------|---|---------------------------------------------------------------------------------------------------------------------------------|--------------------------------------------------------------------------------------------------------------------------------------------------------------------------------------------------------------------|---------------------------------------------------------------------------------------------------------------------------------------------------------------------------------------------|----------------------------------------------------------------------------------------------------------------------------------------------------|------|
| 1  |                                     |                                          |              |                                                  |   |                                                                                                                                 |                                                                                                                                                                                                                    |                                                                                                                                                                                             |                                                                                                                                                    |      |
| 2  |                                     |                                          |              |                                                  |   |                                                                                                                                 |                                                                                                                                                                                                                    |                                                                                                                                                                                             |                                                                                                                                                    |      |
| 3  |                                     |                                          |              |                                                  |   |                                                                                                                                 |                                                                                                                                                                                                                    |                                                                                                                                                                                             |                                                                                                                                                    |      |
| 4  |                                     |                                          |              |                                                  |   |                                                                                                                                 |                                                                                                                                                                                                                    |                                                                                                                                                                                             |                                                                                                                                                    |      |
| 5  | Safran et al.<br>1998 <sup>58</sup> | Cross-sectional study, 7204 patients, US | Primary care | Varied                                           | P | Accessibility, continuity, integration, clinical interaction, interpersonal aspects, trust (The Primary Care Assessment Survey) | Adherence to physician's advice, health status, health outcomes (Medical Outcomes Study (MOS), Behavioral Risk Factor Survey.)                                                                                     | Adherence, health status                                                                                                                                                                    | Health outcomes                                                                                                                                    | 2/1  |
| 6  |                                     |                                          |              |                                                  |   |                                                                                                                                 |                                                                                                                                                                                                                    |                                                                                                                                                                                             |                                                                                                                                                    |      |
| 7  |                                     |                                          |              |                                                  |   |                                                                                                                                 |                                                                                                                                                                                                                    |                                                                                                                                                                                             |                                                                                                                                                    |      |
| 8  |                                     |                                          |              |                                                  |   |                                                                                                                                 |                                                                                                                                                                                                                    |                                                                                                                                                                                             |                                                                                                                                                    |      |
| 9  |                                     |                                          |              |                                                  |   |                                                                                                                                 |                                                                                                                                                                                                                    |                                                                                                                                                                                             |                                                                                                                                                    |      |
| 10 |                                     |                                          |              |                                                  |   |                                                                                                                                 |                                                                                                                                                                                                                    |                                                                                                                                                                                             |                                                                                                                                                    |      |
| 11 |                                     |                                          |              |                                                  |   |                                                                                                                                 |                                                                                                                                                                                                                    |                                                                                                                                                                                             |                                                                                                                                                    |      |
| 12 | Alamo et al.<br>2002 <sup>59</sup>  | Randomized study, 81, Spain              | Primary care | Chronic musculoskeletal pain (CMP), fibromyalgia | P | Patient centered-care ('Gatha-Res questionnaire' and follow-up phone call)                                                      | Pain (Visual Analogue Scale (VAS) anxiety (Oldberg scale of anxiety and depression (GHQ))                                                                                                                          | Anxiety, number of tender points (pain)                                                                                                                                                     | Pain, pain intensity, pain as a problem, number of associated symptoms, depression, physical mobility, social isolation, emotional reaction, sleep | 2/10 |
| 13 |                                     |                                          |              |                                                  |   |                                                                                                                                 |                                                                                                                                                                                                                    |                                                                                                                                                                                             |                                                                                                                                                    |      |
| 14 |                                     |                                          |              |                                                  |   |                                                                                                                                 |                                                                                                                                                                                                                    |                                                                                                                                                                                             |                                                                                                                                                    |      |
| 15 |                                     |                                          |              |                                                  |   |                                                                                                                                 |                                                                                                                                                                                                                    |                                                                                                                                                                                             |                                                                                                                                                    |      |
| 16 |                                     |                                          |              |                                                  |   |                                                                                                                                 |                                                                                                                                                                                                                    |                                                                                                                                                                                             |                                                                                                                                                    |      |
| 17 |                                     |                                          |              |                                                  |   |                                                                                                                                 |                                                                                                                                                                                                                    |                                                                                                                                                                                             |                                                                                                                                                    |      |
| 18 |                                     |                                          |              |                                                  |   |                                                                                                                                 |                                                                                                                                                                                                                    |                                                                                                                                                                                             |                                                                                                                                                    |      |
| 19 |                                     |                                          |              |                                                  |   |                                                                                                                                 |                                                                                                                                                                                                                    |                                                                                                                                                                                             |                                                                                                                                                    |      |
| 20 |                                     |                                          |              |                                                  |   |                                                                                                                                 |                                                                                                                                                                                                                    |                                                                                                                                                                                             |                                                                                                                                                    |      |
| 21 |                                     |                                          |              |                                                  |   |                                                                                                                                 |                                                                                                                                                                                                                    |                                                                                                                                                                                             |                                                                                                                                                    |      |
| 22 | Fan et al.<br>2005 <sup>60</sup>    | Survey, 21689 patients, US               | Primary care | Cardiac care, diabetes, COPD                     | P | Communication skills and humanistic qualities of primary care physician (Seattle Outpatient Satisfaction Survey)                | Physical and emotional aspects, coping ability and symptom burden for angina, COPD and diabetes (Seattle Angina Questionnaire (SAQ), Obstructive Lung Disease Questionnaire (SOLDQ), Diabetes Questionnaire (SDQ)) | Patient ability to deal with all 3 diseases, education for diabetes patients, angina stability, physical limitation due to angina                                                           | Self-reported physical limitation for angina and COPD, symptom burden for diabetes, complications for diabetes                                     | 7/4  |
| 23 |                                     |                                          |              |                                                  |   |                                                                                                                                 |                                                                                                                                                                                                                    |                                                                                                                                                                                             |                                                                                                                                                    |      |
| 24 |                                     |                                          |              |                                                  |   |                                                                                                                                 |                                                                                                                                                                                                                    |                                                                                                                                                                                             |                                                                                                                                                    |      |
| 25 |                                     |                                          |              |                                                  |   |                                                                                                                                 |                                                                                                                                                                                                                    |                                                                                                                                                                                             |                                                                                                                                                    |      |
| 26 |                                     |                                          |              |                                                  |   |                                                                                                                                 |                                                                                                                                                                                                                    |                                                                                                                                                                                             |                                                                                                                                                    |      |
| 27 |                                     |                                          |              |                                                  |   |                                                                                                                                 |                                                                                                                                                                                                                    |                                                                                                                                                                                             |                                                                                                                                                    |      |
| 28 |                                     |                                          |              |                                                  |   |                                                                                                                                 |                                                                                                                                                                                                                    |                                                                                                                                                                                             |                                                                                                                                                    |      |
| 29 |                                     |                                          |              |                                                  |   |                                                                                                                                 |                                                                                                                                                                                                                    |                                                                                                                                                                                             |                                                                                                                                                    |      |
| 30 |                                     |                                          |              |                                                  |   |                                                                                                                                 |                                                                                                                                                                                                                    |                                                                                                                                                                                             |                                                                                                                                                    |      |
| 31 |                                     |                                          |              |                                                  |   |                                                                                                                                 |                                                                                                                                                                                                                    |                                                                                                                                                                                             |                                                                                                                                                    |      |
| 32 | O'Malley et al. 2004 <sup>37</sup>  | Cross-sectional study, 961 patients, US  | Primary care | Varied                                           | P | Patient trust (Survey)                                                                                                          | Use of preventive care services                                                                                                                                                                                    | Blood pressure measurement, height and weight measurement, cholesterol check, pap tests, breast cancer screening, colorectal cancer screening, discussion of diet, discussion on depression | None                                                                                                                                               | 8/0  |
| 33 |                                     |                                          |              |                                                  |   |                                                                                                                                 |                                                                                                                                                                                                                    |                                                                                                                                                                                             |                                                                                                                                                    |      |
| 34 |                                     |                                          |              |                                                  |   |                                                                                                                                 |                                                                                                                                                                                                                    |                                                                                                                                                                                             |                                                                                                                                                    |      |
| 35 |                                     |                                          |              |                                                  |   |                                                                                                                                 |                                                                                                                                                                                                                    |                                                                                                                                                                                             |                                                                                                                                                    |      |
| 36 |                                     |                                          |              |                                                  |   |                                                                                                                                 |                                                                                                                                                                                                                    |                                                                                                                                                                                             |                                                                                                                                                    |      |
| 37 |                                     |                                          |              |                                                  |   |                                                                                                                                 |                                                                                                                                                                                                                    |                                                                                                                                                                                             |                                                                                                                                                    |      |
| 38 |                                     |                                          |              |                                                  |   |                                                                                                                                 |                                                                                                                                                                                                                    |                                                                                                                                                                                             |                                                                                                                                                    |      |
| 39 | Little et al. 2001 <sup>61</sup>    | Survey, 865 patients, UK                 | Primary care | varied                                           | P | Patient centredness (Survey)                                                                                                    | Enablement, symptom burden, resource use                                                                                                                                                                           | Enablement, symptom burden, referrals                                                                                                                                                       | Reattendance, investigations                                                                                                                       | 3/2  |
| 40 |                                     |                                          |              |                                                  |   |                                                                                                                                 |                                                                                                                                                                                                                    |                                                                                                                                                                                             |                                                                                                                                                    |      |
| 41 |                                     |                                          |              |                                                  |   |                                                                                                                                 |                                                                                                                                                                                                                    |                                                                                                                                                                                             |                                                                                                                                                    |      |
| 42 |                                     |                                          |              |                                                  |   |                                                                                                                                 |                                                                                                                                                                                                                    |                                                                                                                                                                                             |                                                                                                                                                    |      |
| 43 |                                     |                                          |              |                                                  |   |                                                                                                                                 |                                                                                                                                                                                                                    |                                                                                                                                                                                             |                                                                                                                                                    |      |
| 44 |                                     |                                          |              |                                                  |   |                                                                                                                                 |                                                                                                                                                                                                                    |                                                                                                                                                                                             |                                                                                                                                                    |      |
| 45 |                                     |                                          |              |                                                  |   |                                                                                                                                 |                                                                                                                                                                                                                    |                                                                                                                                                                                             |                                                                                                                                                    |      |
| 46 |                                     |                                          |              |                                                  |   |                                                                                                                                 |                                                                                                                                                                                                                    |                                                                                                                                                                                             |                                                                                                                                                    |      |
| 47 |                                     |                                          |              |                                                  |   |                                                                                                                                 |                                                                                                                                                                                                                    |                                                                                                                                                                                             |                                                                                                                                                    |      |
| 48 |                                     |                                          |              |                                                  |   |                                                                                                                                 |                                                                                                                                                                                                                    |                                                                                                                                                                                             |                                                                                                                                                    |      |
| 49 |                                     |                                          |              |                                                  |   |                                                                                                                                 |                                                                                                                                                                                                                    |                                                                                                                                                                                             |                                                                                                                                                    |      |

|    |                                                |                                                  |                   |                   |   |                                                                                                         |                                                                                                                                  |                                                                                                                                   |                   |     |
|----|------------------------------------------------|--------------------------------------------------|-------------------|-------------------|---|---------------------------------------------------------------------------------------------------------|----------------------------------------------------------------------------------------------------------------------------------|-----------------------------------------------------------------------------------------------------------------------------------|-------------------|-----|
| 1  |                                                |                                                  |                   |                   |   |                                                                                                         |                                                                                                                                  |                                                                                                                                   |                   |     |
| 2  |                                                |                                                  |                   |                   |   |                                                                                                         |                                                                                                                                  |                                                                                                                                   |                   |     |
| 3  |                                                |                                                  |                   |                   |   |                                                                                                         |                                                                                                                                  |                                                                                                                                   |                   |     |
| 4  |                                                |                                                  |                   |                   |   |                                                                                                         |                                                                                                                                  |                                                                                                                                   |                   |     |
| 5  | Levinson et al. 1997 <sup>62</sup>             | Qualitative cohort study, 124 physicians, US     | Primary care      | Varied            | P | Physician-patient communication (Assessment of audiotape)                                               | Malpractice                                                                                                                      | Malpractice claims                                                                                                                | None              | 1/0 |
| 6  |                                                |                                                  |                   |                   |   |                                                                                                         |                                                                                                                                  |                                                                                                                                   |                   |     |
| 7  |                                                |                                                  |                   |                   |   |                                                                                                         |                                                                                                                                  |                                                                                                                                   |                   |     |
| 8  |                                                |                                                  |                   |                   |   |                                                                                                         |                                                                                                                                  |                                                                                                                                   |                   |     |
| 9  | Carcaise-Edinboro & Bradley 2008 <sup>38</sup> | Cross sectional study, 8488 patients, US         | Primary care      | Colorectal cancer | P | Patient-provider communication (Consumer Assessment of Healthcare Providers and Systems (CAHPS) survey) | Colorectal Cancer screening, fecal occult blood testing, and colonoscopy (Medical Expenditure Panel Survey)                      | CRC screening, fecal occult blood testing, colonoscopy                                                                            | None              | 3/0 |
| 10 |                                                |                                                  |                   |                   |   |                                                                                                         |                                                                                                                                  |                                                                                                                                   |                   |     |
| 11 |                                                |                                                  |                   |                   |   |                                                                                                         |                                                                                                                                  |                                                                                                                                   |                   |     |
| 12 |                                                |                                                  |                   |                   |   |                                                                                                         |                                                                                                                                  |                                                                                                                                   |                   |     |
| 13 |                                                |                                                  |                   |                   |   |                                                                                                         |                                                                                                                                  |                                                                                                                                   |                   |     |
| 14 |                                                |                                                  |                   |                   |   |                                                                                                         |                                                                                                                                  |                                                                                                                                   |                   |     |
| 15 | Schneider et al. 2004 <sup>31</sup>            | Cross-sectional analysis study, 554 patients, US | Primary care      | HIV               | P | Physician-patient relationship (Survey)                                                                 | Adherence (Survey)                                                                                                               | Adherence to antiretroviral therapy                                                                                               | None              | 1/0 |
| 16 |                                                |                                                  |                   |                   |   |                                                                                                         |                                                                                                                                  |                                                                                                                                   |                   |     |
| 17 |                                                |                                                  |                   |                   |   |                                                                                                         |                                                                                                                                  |                                                                                                                                   |                   |     |
| 18 |                                                |                                                  |                   |                   |   |                                                                                                         |                                                                                                                                  |                                                                                                                                   |                   |     |
| 19 |                                                |                                                  |                   |                   |   |                                                                                                         |                                                                                                                                  |                                                                                                                                   |                   |     |
| 20 | Schoenthaler et al. 2008 <sup>32</sup>         | Cross-sectional study, 439 patients, US          | Primary care      | Hypertension      | P | Patients' perceptions of providers' communication (Survey)                                              | Medication adherence (Morisky self-report measure)                                                                               | Medication adherence                                                                                                              | None              | 1/0 |
| 21 |                                                |                                                  |                   |                   |   |                                                                                                         |                                                                                                                                  |                                                                                                                                   |                   |     |
| 22 |                                                |                                                  |                   |                   |   |                                                                                                         |                                                                                                                                  |                                                                                                                                   |                   |     |
| 23 | Slatore et al. 2010 <sup>63</sup>              | Cross sectional study, 342 patients, US          | Range of settings | COPD              | P | Patient-clinician communication (Quality of communication questionnaire (QOC))                          | Self-reported breathing problem confidence, and general self-rated health (Survey)                                               | Confidence in dealing with breathing problems                                                                                     | Self-rated health | 1/1 |
| 24 |                                                |                                                  |                   |                   |   |                                                                                                         |                                                                                                                                  |                                                                                                                                   |                   |     |
| 25 |                                                |                                                  |                   |                   |   |                                                                                                         |                                                                                                                                  |                                                                                                                                   |                   |     |
| 26 |                                                |                                                  |                   |                   |   |                                                                                                         |                                                                                                                                  |                                                                                                                                   |                   |     |
| 27 | Lee & Lin 2009 <sup>64</sup>                   | Cohort study, 480 patients, Taiwan               | Range of settings | Type 2 diabetes   | P | Trust in physicians (Survey)                                                                            | Self-efficacy, adherence, health outcomes (Multidimensional Diabetes Questionnaire and 12-Item Short-Form Health Survey (SF-12)) | Physical HRQoL, mental HRQoL, body mass index HbA1c, triglycerides, complications, self-efficacy, outcome expectations, adherence | None              | 9/0 |
| 28 |                                                |                                                  |                   |                   |   |                                                                                                         |                                                                                                                                  |                                                                                                                                   |                   |     |
| 29 |                                                |                                                  |                   |                   |   |                                                                                                         |                                                                                                                                  |                                                                                                                                   |                   |     |
| 30 |                                                |                                                  |                   |                   |   |                                                                                                         |                                                                                                                                  |                                                                                                                                   |                   |     |
| 31 |                                                |                                                  |                   |                   |   |                                                                                                         |                                                                                                                                  |                                                                                                                                   |                   |     |
| 32 |                                                |                                                  |                   |                   |   |                                                                                                         |                                                                                                                                  |                                                                                                                                   |                   |     |
| 33 | Heisler et al. 2002 <sup>33</sup>              | Survey, 1314 patients, US                        | primary care      | Diabetes          | P | Physician communication, physician interaction styles, participatory decision making (Questionnaire)    | Disease management (Surveys and national databases)                                                                              | Overall self-management, diabetes diet, medication compliance, exercise, blood glucose monitoring, foot care.                     | Exercise          | 6/1 |
| 34 |                                                |                                                  |                   |                   |   |                                                                                                         |                                                                                                                                  |                                                                                                                                   |                   |     |
| 35 |                                                |                                                  |                   |                   |   |                                                                                                         |                                                                                                                                  |                                                                                                                                   |                   |     |
| 36 |                                                |                                                  |                   |                   |   |                                                                                                         |                                                                                                                                  |                                                                                                                                   |                   |     |
| 37 |                                                |                                                  |                   |                   |   |                                                                                                         |                                                                                                                                  |                                                                                                                                   |                   |     |
| 38 |                                                |                                                  |                   |                   |   |                                                                                                         |                                                                                                                                  |                                                                                                                                   |                   |     |
| 39 |                                                |                                                  |                   |                   |   |                                                                                                         |                                                                                                                                  |                                                                                                                                   |                   |     |
| 40 |                                                |                                                  |                   |                   |   |                                                                                                         |                                                                                                                                  |                                                                                                                                   |                   |     |
| 41 |                                                |                                                  |                   |                   |   |                                                                                                         |                                                                                                                                  |                                                                                                                                   |                   |     |
| 42 |                                                |                                                  |                   |                   |   |                                                                                                         |                                                                                                                                  |                                                                                                                                   |                   |     |
| 43 |                                                |                                                  |                   |                   |   |                                                                                                         |                                                                                                                                  |                                                                                                                                   |                   |     |
| 44 |                                                |                                                  |                   |                   |   |                                                                                                         |                                                                                                                                  |                                                                                                                                   |                   |     |
| 45 |                                                |                                                  |                   |                   |   |                                                                                                         |                                                                                                                                  |                                                                                                                                   |                   |     |
| 46 |                                                |                                                  |                   |                   |   |                                                                                                         |                                                                                                                                  |                                                                                                                                   |                   |     |
| 47 |                                                |                                                  |                   |                   |   |                                                                                                         |                                                                                                                                  |                                                                                                                                   |                   |     |
| 48 |                                                |                                                  |                   |                   |   |                                                                                                         |                                                                                                                                  |                                                                                                                                   |                   |     |
| 49 |                                                |                                                  |                   |                   |   |                                                                                                         |                                                                                                                                  |                                                                                                                                   |                   |     |

|    |                                         |                                                           |                      |                               |   |                                                                                                                                                        |                                                                                                                                                                                  |                                                                                                                              |                                                                                                                                                                                                                                                                                                                                |      |
|----|-----------------------------------------|-----------------------------------------------------------|----------------------|-------------------------------|---|--------------------------------------------------------------------------------------------------------------------------------------------------------|----------------------------------------------------------------------------------------------------------------------------------------------------------------------------------|------------------------------------------------------------------------------------------------------------------------------|--------------------------------------------------------------------------------------------------------------------------------------------------------------------------------------------------------------------------------------------------------------------------------------------------------------------------------|------|
| 1  |                                         |                                                           |                      |                               |   |                                                                                                                                                        |                                                                                                                                                                                  |                                                                                                                              |                                                                                                                                                                                                                                                                                                                                |      |
| 2  |                                         |                                                           |                      |                               |   |                                                                                                                                                        |                                                                                                                                                                                  |                                                                                                                              |                                                                                                                                                                                                                                                                                                                                |      |
| 3  |                                         |                                                           |                      |                               |   |                                                                                                                                                        |                                                                                                                                                                                  |                                                                                                                              |                                                                                                                                                                                                                                                                                                                                |      |
| 4  |                                         |                                                           |                      |                               |   |                                                                                                                                                        |                                                                                                                                                                                  |                                                                                                                              |                                                                                                                                                                                                                                                                                                                                |      |
| 5  | Lee & Lin<br>2010 <sup>65</sup>         | Cohort study,<br>614 patients,<br>Taiwan                  | Range of<br>settings | Type 2 diabetes               | P | Patients' perceptions of<br>support, autonomy, trust,<br>satisfaction (Health Care<br>Climate Questionnaire and<br>Autonomy Preference Index<br>(API)) | Glycosylated<br>hemoglobin (HbA1C)<br>(medical records)<br>Physical and mental<br>health-related quality of<br>life (HRQoL) (SF-12)                                              | Physical HRQoL, mental HRQoL                                                                                                 | Information<br>preference<br>interaction, HbA1C                                                                                                                                                                                                                                                                                | 2/2  |
| 6  |                                         |                                                           |                      |                               |   |                                                                                                                                                        |                                                                                                                                                                                  |                                                                                                                              |                                                                                                                                                                                                                                                                                                                                |      |
| 7  |                                         |                                                           |                      |                               |   |                                                                                                                                                        |                                                                                                                                                                                  |                                                                                                                              |                                                                                                                                                                                                                                                                                                                                |      |
| 8  |                                         |                                                           |                      |                               |   |                                                                                                                                                        |                                                                                                                                                                                  |                                                                                                                              |                                                                                                                                                                                                                                                                                                                                |      |
| 9  |                                         |                                                           |                      |                               |   |                                                                                                                                                        |                                                                                                                                                                                  |                                                                                                                              |                                                                                                                                                                                                                                                                                                                                |      |
| 10 |                                         |                                                           |                      |                               |   |                                                                                                                                                        |                                                                                                                                                                                  |                                                                                                                              |                                                                                                                                                                                                                                                                                                                                |      |
| 11 | Kennedy A.<br>et al. 2003 <sup>66</sup> | Randomised<br>control trial,<br>700 patients,<br>UK       | Hospital             | Inflammatory bowel<br>Disease | P | Patient centered-care<br>(Interviews)                                                                                                                  | Resource use, self-rated<br>physical and mental<br>health, enablement<br>(Patient diaries,<br>questionnaires, medical<br>records)                                                | Ability to cope with condition,<br>symptom relapses, hospital visits,<br>appointments made                                   | Physical<br>functioning, role<br>limitations, social<br>functioning, mental<br>health,<br>energy/vitality,<br>pain, general<br>health perception,<br>anxiety, number of<br>relapses, number of<br>medically-defined<br>relapses, average<br>relapse duration,<br>frequency of GP<br>visits, delay before<br>starting treatment | 4/13 |
| 12 |                                         |                                                           |                      |                               |   |                                                                                                                                                        |                                                                                                                                                                                  |                                                                                                                              |                                                                                                                                                                                                                                                                                                                                |      |
| 13 |                                         |                                                           |                      |                               |   |                                                                                                                                                        |                                                                                                                                                                                  |                                                                                                                              |                                                                                                                                                                                                                                                                                                                                |      |
| 14 |                                         |                                                           |                      |                               |   |                                                                                                                                                        |                                                                                                                                                                                  |                                                                                                                              |                                                                                                                                                                                                                                                                                                                                |      |
| 15 |                                         |                                                           |                      |                               |   |                                                                                                                                                        |                                                                                                                                                                                  |                                                                                                                              |                                                                                                                                                                                                                                                                                                                                |      |
| 16 |                                         |                                                           |                      |                               |   |                                                                                                                                                        |                                                                                                                                                                                  |                                                                                                                              |                                                                                                                                                                                                                                                                                                                                |      |
| 17 |                                         |                                                           |                      |                               |   |                                                                                                                                                        |                                                                                                                                                                                  |                                                                                                                              |                                                                                                                                                                                                                                                                                                                                |      |
| 18 |                                         |                                                           |                      |                               |   |                                                                                                                                                        |                                                                                                                                                                                  |                                                                                                                              |                                                                                                                                                                                                                                                                                                                                |      |
| 19 |                                         |                                                           |                      |                               |   |                                                                                                                                                        |                                                                                                                                                                                  |                                                                                                                              |                                                                                                                                                                                                                                                                                                                                |      |
| 20 |                                         |                                                           |                      |                               |   |                                                                                                                                                        |                                                                                                                                                                                  |                                                                                                                              |                                                                                                                                                                                                                                                                                                                                |      |
| 21 |                                         |                                                           |                      |                               |   |                                                                                                                                                        |                                                                                                                                                                                  |                                                                                                                              |                                                                                                                                                                                                                                                                                                                                |      |
| 22 |                                         |                                                           |                      |                               |   |                                                                                                                                                        |                                                                                                                                                                                  |                                                                                                                              |                                                                                                                                                                                                                                                                                                                                |      |
| 23 |                                         |                                                           |                      |                               |   |                                                                                                                                                        |                                                                                                                                                                                  |                                                                                                                              |                                                                                                                                                                                                                                                                                                                                |      |
| 24 |                                         |                                                           |                      |                               |   |                                                                                                                                                        |                                                                                                                                                                                  |                                                                                                                              |                                                                                                                                                                                                                                                                                                                                |      |
| 25 |                                         |                                                           |                      |                               |   |                                                                                                                                                        |                                                                                                                                                                                  |                                                                                                                              |                                                                                                                                                                                                                                                                                                                                |      |
| 26 | Stewart et<br>al. 2000 <sup>41</sup>    | Observational<br>Cohort study,<br>315 patients,<br>Canada | Primary care         | General                       | P | Patient-centred<br>communication (Assessment<br>of audiotape and Patient-<br>Centered Communication<br>Score tool)                                     | Discomfort (VAS)<br>symptom severity<br>severity (Visual<br>Analogue Scale), Health<br>Status (Short Form-36<br>SF-36) Quality of care<br>provision (Chart review<br>by doctors) | Symptom discomfort & concern,<br>self-reported health, diagnostic<br>tests, referrals, and visits to the<br>family physician | None                                                                                                                                                                                                                                                                                                                           | 5/2  |
| 27 |                                         |                                                           |                      |                               |   |                                                                                                                                                        |                                                                                                                                                                                  |                                                                                                                              |                                                                                                                                                                                                                                                                                                                                |      |
| 28 |                                         |                                                           |                      |                               |   |                                                                                                                                                        |                                                                                                                                                                                  |                                                                                                                              |                                                                                                                                                                                                                                                                                                                                |      |
| 29 |                                         |                                                           |                      |                               |   |                                                                                                                                                        |                                                                                                                                                                                  |                                                                                                                              |                                                                                                                                                                                                                                                                                                                                |      |
| 30 |                                         |                                                           |                      |                               |   |                                                                                                                                                        |                                                                                                                                                                                  |                                                                                                                              |                                                                                                                                                                                                                                                                                                                                |      |
| 31 |                                         |                                                           |                      |                               |   |                                                                                                                                                        |                                                                                                                                                                                  |                                                                                                                              |                                                                                                                                                                                                                                                                                                                                |      |
| 32 |                                         |                                                           |                      |                               |   |                                                                                                                                                        |                                                                                                                                                                                  |                                                                                                                              |                                                                                                                                                                                                                                                                                                                                |      |
| 33 |                                         |                                                           |                      |                               |   |                                                                                                                                                        |                                                                                                                                                                                  |                                                                                                                              |                                                                                                                                                                                                                                                                                                                                |      |
| 34 | Kinnersley et<br>al. 1999 <sup>67</sup> | Observational<br>Study, 143<br>patients, UK               | Primary care         | Varied                        | P | Patient-centredness<br>(Assessment of audiotape<br>and questionnaires)                                                                                 | Symptom resolution,<br>resolution of concerns,<br>functional health status<br>(Questionnaire)                                                                                    | None                                                                                                                         | Resolution of<br>symptoms,<br>resolution of<br>concerns,<br>functional health<br>status                                                                                                                                                                                                                                        | 0/3  |
| 35 |                                         |                                                           |                      |                               |   |                                                                                                                                                        |                                                                                                                                                                                  |                                                                                                                              |                                                                                                                                                                                                                                                                                                                                |      |
| 36 |                                         |                                                           |                      |                               |   |                                                                                                                                                        |                                                                                                                                                                                  |                                                                                                                              |                                                                                                                                                                                                                                                                                                                                |      |
| 37 |                                         |                                                           |                      |                               |   |                                                                                                                                                        |                                                                                                                                                                                  |                                                                                                                              |                                                                                                                                                                                                                                                                                                                                |      |
| 38 |                                         |                                                           |                      |                               |   |                                                                                                                                                        |                                                                                                                                                                                  |                                                                                                                              |                                                                                                                                                                                                                                                                                                                                |      |
| 39 |                                         |                                                           |                      |                               |   |                                                                                                                                                        |                                                                                                                                                                                  |                                                                                                                              |                                                                                                                                                                                                                                                                                                                                |      |
| 40 |                                         |                                                           |                      |                               |   |                                                                                                                                                        |                                                                                                                                                                                  |                                                                                                                              |                                                                                                                                                                                                                                                                                                                                |      |
| 41 |                                         |                                                           |                      |                               |   |                                                                                                                                                        |                                                                                                                                                                                  |                                                                                                                              |                                                                                                                                                                                                                                                                                                                                |      |
| 42 |                                         |                                                           |                      |                               |   |                                                                                                                                                        |                                                                                                                                                                                  |                                                                                                                              |                                                                                                                                                                                                                                                                                                                                |      |
| 43 |                                         |                                                           |                      |                               |   |                                                                                                                                                        |                                                                                                                                                                                  |                                                                                                                              |                                                                                                                                                                                                                                                                                                                                |      |
| 44 |                                         |                                                           |                      |                               |   |                                                                                                                                                        |                                                                                                                                                                                  |                                                                                                                              |                                                                                                                                                                                                                                                                                                                                |      |
| 45 |                                         |                                                           |                      |                               |   |                                                                                                                                                        |                                                                                                                                                                                  |                                                                                                                              |                                                                                                                                                                                                                                                                                                                                |      |
| 46 |                                         |                                                           |                      |                               |   |                                                                                                                                                        |                                                                                                                                                                                  |                                                                                                                              |                                                                                                                                                                                                                                                                                                                                |      |
| 47 |                                         |                                                           |                      |                               |   |                                                                                                                                                        |                                                                                                                                                                                  |                                                                                                                              |                                                                                                                                                                                                                                                                                                                                |      |
| 48 |                                         |                                                           |                      |                               |   |                                                                                                                                                        |                                                                                                                                                                                  |                                                                                                                              |                                                                                                                                                                                                                                                                                                                                |      |
| 49 |                                         |                                                           |                      |                               |   |                                                                                                                                                        |                                                                                                                                                                                  |                                                                                                                              |                                                                                                                                                                                                                                                                                                                                |      |

|    |                                    |                                          |                                     |                                                                                              |   |                                                                                                                                                 |                                                                                                                                                              |                                                                                                                                                                                           |                                    |      |
|----|------------------------------------|------------------------------------------|-------------------------------------|----------------------------------------------------------------------------------------------|---|-------------------------------------------------------------------------------------------------------------------------------------------------|--------------------------------------------------------------------------------------------------------------------------------------------------------------|-------------------------------------------------------------------------------------------------------------------------------------------------------------------------------------------|------------------------------------|------|
| 1  |                                    |                                          |                                     |                                                                                              |   |                                                                                                                                                 |                                                                                                                                                              |                                                                                                                                                                                           |                                    |      |
| 2  |                                    |                                          |                                     |                                                                                              |   |                                                                                                                                                 |                                                                                                                                                              |                                                                                                                                                                                           |                                    |      |
| 3  |                                    |                                          |                                     |                                                                                              |   |                                                                                                                                                 |                                                                                                                                                              |                                                                                                                                                                                           |                                    |      |
| 4  |                                    |                                          |                                     |                                                                                              |   |                                                                                                                                                 |                                                                                                                                                              |                                                                                                                                                                                           |                                    |      |
| 5  | Solberg et al. 2008 <sup>50</sup>  | Survey, 3109 patients, US                | Primary care - multispecialty group | Varied                                                                                       | P | Patient experience of errors (Survey)                                                                                                           | Review of errors (Chart audits and physician reviewer judgements)                                                                                            | None                                                                                                                                                                                      | None                               | 1/0  |
| 6  |                                    |                                          |                                     |                                                                                              |   |                                                                                                                                                 |                                                                                                                                                              |                                                                                                                                                                                           |                                    |      |
| 7  |                                    |                                          |                                     |                                                                                              |   |                                                                                                                                                 |                                                                                                                                                              |                                                                                                                                                                                           |                                    |      |
| 8  | Isaac et al. 2010 <sup>45</sup>    | Cross-sectional study, 927 hospitals, US | Hospital                            | Acute myocardial infarction, congestive heart failure, pneumonia complications from surgery. | O | General patient experiences (Hospital Consumer Assessment of Healthcare Providers and Systems survey (HCAHPS))                                  | Processes of care (Health Quality Alliance (HQA) database) and Patient Safety Indicators                                                                     | Decubitus ulcer rates, infections, processes of care for pneumonia, CHF and myocardial infarctions, surgical composites, hemorrhage, respiratory failure, DVT, pulmonary embolism, sepsis | Failure to rescue                  | 11/1 |
| 9  |                                    |                                          |                                     |                                                                                              |   |                                                                                                                                                 |                                                                                                                                                              |                                                                                                                                                                                           |                                    |      |
| 10 |                                    |                                          |                                     |                                                                                              |   |                                                                                                                                                 |                                                                                                                                                              |                                                                                                                                                                                           |                                    |      |
| 11 |                                    |                                          |                                     |                                                                                              |   |                                                                                                                                                 |                                                                                                                                                              |                                                                                                                                                                                           |                                    |      |
| 12 |                                    |                                          |                                     |                                                                                              |   |                                                                                                                                                 |                                                                                                                                                              |                                                                                                                                                                                           |                                    |      |
| 13 |                                    |                                          |                                     |                                                                                              |   |                                                                                                                                                 |                                                                                                                                                              |                                                                                                                                                                                           |                                    |      |
| 14 |                                    |                                          |                                     |                                                                                              |   |                                                                                                                                                 |                                                                                                                                                              |                                                                                                                                                                                           |                                    |      |
| 15 | Glickman et al. 2010 <sup>25</sup> | Cohort Study, 3562 patients, US          | Hospital                            | Acute myocardial infarction                                                                  | P | Patient satisfaction (Press-Ganey survey)                                                                                                       | Adherence to practice guidelines, outcomes (CRUSADE quality improvement registry).                                                                           | Inpatient mortality, composite clinical measures, AMI survival                                                                                                                            | None                               | 3/0  |
| 16 |                                    |                                          |                                     |                                                                                              |   |                                                                                                                                                 |                                                                                                                                                              |                                                                                                                                                                                           |                                    |      |
| 17 |                                    |                                          |                                     |                                                                                              |   |                                                                                                                                                 |                                                                                                                                                              |                                                                                                                                                                                           |                                    |      |
| 18 |                                    |                                          |                                     |                                                                                              |   |                                                                                                                                                 |                                                                                                                                                              |                                                                                                                                                                                           |                                    |      |
| 19 | Fremont et al. 2001 <sup>68</sup>  | Survey, 1346 patients, US                | Hospital                            | Cardiac                                                                                      | P | Patient centred care (Picker survey)                                                                                                            | Processes of care, functional health status, cardiac symptoms (Medical Outcomes Study questionnaire, London School of Hygiene measures for cardiac symptoms) | Overall health, chest pain, patient reported general physical and mental health status                                                                                                    | Mental health, shortness of breath | 5/2  |
| 20 |                                    |                                          |                                     |                                                                                              |   |                                                                                                                                                 |                                                                                                                                                              |                                                                                                                                                                                           |                                    |      |
| 21 |                                    |                                          |                                     |                                                                                              |   |                                                                                                                                                 |                                                                                                                                                              |                                                                                                                                                                                           |                                    |      |
| 22 |                                    |                                          |                                     |                                                                                              |   |                                                                                                                                                 |                                                                                                                                                              |                                                                                                                                                                                           |                                    |      |
| 23 |                                    |                                          |                                     |                                                                                              |   |                                                                                                                                                 |                                                                                                                                                              |                                                                                                                                                                                           |                                    |      |
| 24 |                                    |                                          |                                     |                                                                                              |   |                                                                                                                                                 |                                                                                                                                                              |                                                                                                                                                                                           |                                    |      |
| 25 |                                    |                                          |                                     |                                                                                              |   |                                                                                                                                                 |                                                                                                                                                              |                                                                                                                                                                                           |                                    |      |
| 26 |                                    |                                          |                                     |                                                                                              |   |                                                                                                                                                 |                                                                                                                                                              |                                                                                                                                                                                           |                                    |      |
| 27 | Riley et al. 2007 <sup>69</sup>    | Survey, 506 patients, Canada             | Hospital                            | Cardiac care - acute coronary                                                                | P | Continuity of care (The Heart Continuity of Care Questionnaire, Medical Outcome Study Social Support Survey, Illness Perception Questionnaire ) | Participation in cardiac rehabilitation, perception of illness, functional capacity (Duke Activity Status Index (DASI))                                      | Cardiac rehabilitation participation, perceptions of illness consequences                                                                                                                 | None                               | 2/0  |
| 28 |                                    |                                          |                                     |                                                                                              |   |                                                                                                                                                 |                                                                                                                                                              |                                                                                                                                                                                           |                                    |      |
| 29 |                                    |                                          |                                     |                                                                                              |   |                                                                                                                                                 |                                                                                                                                                              |                                                                                                                                                                                           |                                    |      |
| 30 |                                    |                                          |                                     |                                                                                              |   |                                                                                                                                                 |                                                                                                                                                              |                                                                                                                                                                                           |                                    |      |
| 31 |                                    |                                          |                                     |                                                                                              |   |                                                                                                                                                 |                                                                                                                                                              |                                                                                                                                                                                           |                                    |      |
| 32 |                                    |                                          |                                     |                                                                                              |   |                                                                                                                                                 |                                                                                                                                                              |                                                                                                                                                                                           |                                    |      |
| 33 | Weingart et al. 2005 <sup>48</sup> | Cohort study, 228 patients, US           | Hospital                            | Varied                                                                                       | P | Patient experience of adverse events (Interviews)                                                                                               | Adverse events (Medical records and patient interviews)                                                                                                      | Adverse events                                                                                                                                                                            | None                               | 1/0  |
| 34 |                                    |                                          |                                     |                                                                                              |   |                                                                                                                                                 |                                                                                                                                                              |                                                                                                                                                                                           |                                    |      |
| 35 |                                    |                                          |                                     |                                                                                              |   |                                                                                                                                                 |                                                                                                                                                              |                                                                                                                                                                                           |                                    |      |
| 36 | Weissman et al. 2008 <sup>49</sup> | Survey, 998 patients, US                 | Hospital                            | Varied                                                                                       | P | Patient experience of adverse events (Interviews)                                                                                               | Adverse events (Medical records)                                                                                                                             | Adverse events                                                                                                                                                                            | None                               | 1/0  |
| 37 |                                    |                                          |                                     |                                                                                              |   |                                                                                                                                                 |                                                                                                                                                              |                                                                                                                                                                                           |                                    |      |
| 38 |                                    |                                          |                                     |                                                                                              |   |                                                                                                                                                 |                                                                                                                                                              |                                                                                                                                                                                           |                                    |      |
| 39 |                                    |                                          |                                     |                                                                                              |   |                                                                                                                                                 |                                                                                                                                                              |                                                                                                                                                                                           |                                    |      |
| 40 |                                    |                                          |                                     |                                                                                              |   |                                                                                                                                                 |                                                                                                                                                              |                                                                                                                                                                                           |                                    |      |
| 41 |                                    |                                          |                                     |                                                                                              |   |                                                                                                                                                 |                                                                                                                                                              |                                                                                                                                                                                           |                                    |      |
| 42 |                                    |                                          |                                     |                                                                                              |   |                                                                                                                                                 |                                                                                                                                                              |                                                                                                                                                                                           |                                    |      |
| 43 |                                    |                                          |                                     |                                                                                              |   |                                                                                                                                                 |                                                                                                                                                              |                                                                                                                                                                                           |                                    |      |
| 44 |                                    |                                          |                                     |                                                                                              |   |                                                                                                                                                 |                                                                                                                                                              |                                                                                                                                                                                           |                                    |      |
| 45 |                                    |                                          |                                     |                                                                                              |   |                                                                                                                                                 |                                                                                                                                                              |                                                                                                                                                                                           |                                    |      |
| 46 |                                    |                                          |                                     |                                                                                              |   |                                                                                                                                                 |                                                                                                                                                              |                                                                                                                                                                                           |                                    |      |
| 47 |                                    |                                          |                                     |                                                                                              |   |                                                                                                                                                 |                                                                                                                                                              |                                                                                                                                                                                           |                                    |      |
| 48 |                                    |                                          |                                     |                                                                                              |   |                                                                                                                                                 |                                                                                                                                                              |                                                                                                                                                                                           |                                    |      |
| 49 |                                    |                                          |                                     |                                                                                              |   |                                                                                                                                                 |                                                                                                                                                              |                                                                                                                                                                                           |                                    |      |

1  
2  
3  
4  
5  
6  
7  
8  
9  
10  
11  
12  
13  
14  
15  
16  
17  
18  
19  
20  
21  
22  
23  
24  
25  
26  
27  
28  
29  
30  
31  
32  
33  
34  
35  
36  
37  
38  
39  
40  
41  
42  
43  
44  
45  
46  
47  
48  
49

**Table 7: Systematic reviews**

| Authors                             | Timespan & studies meeting inclusion criteria | Health care setting | Disease areas covered                                                                                   | Unit of analysis | Patient experience focus (and measurement methods)                                        | Safety & effectiveness measure - association demonstrated -                                                                                                                                                                                                                                                                      | Safety & effectiveness measure - association NOT demonstrated                                                                                                              | Assoc found vs not found |
|-------------------------------------|-----------------------------------------------|---------------------|---------------------------------------------------------------------------------------------------------|------------------|-------------------------------------------------------------------------------------------|----------------------------------------------------------------------------------------------------------------------------------------------------------------------------------------------------------------------------------------------------------------------------------------------------------------------------------|----------------------------------------------------------------------------------------------------------------------------------------------------------------------------|--------------------------|
| Blasi et al. 2001 <sup>70</sup>     | 1974-1998, 4 out of 25                        | Range of settings   | Asthma, hypertension, cancer, insomnia, menopause, obesity, tonsillitis                                 | P                | Provider behaviour and communication (Grading of consultations)                           | Health status, symptom improvement, treatment effectiveness, fear of injection, anxiety, ratings of pain, number of doctor visits, pain, speed of recovery                                                                                                                                                                       | Comfort, recovery time, return visits                                                                                                                                      | 9/3                      |
| Drotar 2009 <sup>27</sup>           | 1998-2008, 4 out of 22                        | Range of settings   | Asthma, cystic fibrosis, diabetes, epilepsy, inflammatory bowel disease, juvenile rheumatoid arthritis  | P                | Physician and staff behavior (Surveys, interviews, medical records)                       | Treatment adherence, compliance, office visits, phone calls, hospitalizations                                                                                                                                                                                                                                                    | Medication adherence                                                                                                                                                       | 5/1                      |
| Hall et al. 2010 <sup>71</sup>      | 1990-2009, 10 out of 14                       | Range of settings   | Brain injury, musculoskeletal conditions, cardiac conditions, trauma, back, neck and shoulder pain      | P                | Therapist-patient relationship, therapeutic alliance (Surveys, audio/video taped session) | Adherence, employment status, physical training, therapeutic success, perceived effect of treatment, pain, physical function, depression, general health status, attendance, floor-bench lifts, global assessment scores, ability to perform ADLs, mobility                                                                      | Weekly physical training, disability, productivity, depression, functional status, adherence                                                                               | 18/6                     |
| Stevenson et al. 2004 <sup>72</sup> | 1991-2000, 7 out of 134                       | Range of settings   | Hypertension, asthma, chronic obstructive pulmonary disorder, ovarian cancer, epilepsy, hyperlipidaemia | P                | Doctor-patient communication (Surveys)                                                    | Self-reported adherence, blood pressure control, GP practice visits, hospitalizations, emergency room visits for children with asthma, quality of life for COPD patients, oral contraceptive adherence, adherence to anti-epileptic drugs, pain control following gynaecological surgery, adherence to medication for depression | Length of visits to doctor for asthma patients, health status and use of health care services for epilepsy patients, adherence to Niacin and bile acid sequestrant therapy | 9/5                      |

1  
2  
3  
4  
5  
6  
7  
8  
9  
10  
11  
12  
13  
14  
15  
16  
17  
18  
19  
20  
21  
22  
23  
24  
25  
26  
27  
28  
29  
30  
31  
32  
33  
34  
35  
36  
37  
38  
39  
40  
41  
42  
43  
44  
45  
46  
47  
48  
49

For Peer Review Only

|                                             |                                          |                   |                            |   |                                                                                                                                       |                                                                                                                                                                                                                                                                                                                                                                                                                                                                                                                                                                     |                                                                                                                                                                                                                                                                                                                                                                                                                  |       |
|---------------------------------------------|------------------------------------------|-------------------|----------------------------|---|---------------------------------------------------------------------------------------------------------------------------------------|---------------------------------------------------------------------------------------------------------------------------------------------------------------------------------------------------------------------------------------------------------------------------------------------------------------------------------------------------------------------------------------------------------------------------------------------------------------------------------------------------------------------------------------------------------------------|------------------------------------------------------------------------------------------------------------------------------------------------------------------------------------------------------------------------------------------------------------------------------------------------------------------------------------------------------------------------------------------------------------------|-------|
| 5 Saultz & Lochner 2005 <sup>43</sup>       | 1967-2002, X out of 41 (CATHAL TO CHECK) | Range of settings | Varied                     | P | Continuity of care -ongoing relationship between individual doctor &patient (Surveys, continuity of care index)                       | Hospitalization rate, hospital readmission, length of stay, influenza immunization, preventive care, antibiotic compliance, ICU days, Neonatal morbidity, Apgar score, Birth weight, Rates and timeliness of childhood immunizations, health-related quality of life, recommended diabetes care measures, glucose control, PAP tests, mammogram rate, breast exams, surgical operation rates, hypertension control, presence of depression, relationship problems, adverse events in hospitalized patients, degree of patient enablement, rheumatic fever incidence | Diabetes (HbA1C, lipid control, blood pressure control, presence of diabetic complications), blood glucose control, functional ability of elderly patients, compliance with antibiotic therapy, well-child visits, blood pressure checks in women, pregnancy complications, newborn mortality, immunization rates, NICU admissions, Apgar scores, caesarean rate, length of labor, indications for tonsillectomy | 51/30 |
| 17 Hall & Roter & Katz 1988 <sup>73</sup>   | Meta-analysis 41 studies                 | Range of settings | Varied                     | P | Clinician-patient communication (Surveys, interviews, observations, assessment of video or audio)                                     | Compliance (with 4 variables of PE), recall/understanding (with 4 variables of PE)                                                                                                                                                                                                                                                                                                                                                                                                                                                                                  | Compliance (with 1 variable of PE), recall/understanding (with 1 variable of PE)                                                                                                                                                                                                                                                                                                                                 | 8/2   |
| 22 Jackson, C. et al. 2010 <sup>39</sup>    | 1984-2008, 3 out of 17                   | Range of settings | Inflammatory bowel disease | P | Trust in physician, Patient-physician agreement, adequacy information (Surveys)                                                       | Adherence to treatment                                                                                                                                                                                                                                                                                                                                                                                                                                                                                                                                              | Compliance                                                                                                                                                                                                                                                                                                                                                                                                       | 2/1   |
| 26 Sans-Corralles et al. 2006 <sup>42</sup> | 1984-2005, 9 out of 20                   | Primary care      | No specific disease focus  | P | Continuity of care, coordination of care, consultation time, doctor-patient relationship (Validated tools in these different domains) | Hospital admissions, length of stay, compliance, recovery from discomfort, emotional health, diagnostic tests, referrals, quality of care for asthma, diabetes and angina, symptom burden, receipt of preventive services                                                                                                                                                                                                                                                                                                                                           | Enablement                                                                                                                                                                                                                                                                                                                                                                                                       | 13/1  |
| 32 Hsiao & Boulton 2008 <sup>44</sup>       | 1984-2003, 3 out of 14                   | Primary care      | No specific disease focus  | P | Continuity with physician (Surveys, interviews, medical records, chart reviews)                                                       | Hospitalisations for all conditions and ambulatory care-sensitive conditions, odds of hospitalisation(2), health care costs(2), emergency department visits, emergent hospital admissions(2), length of stay, diabetes recognition, mental health(2), pain, perception of health, well-being, BMI, triglyceride concentrations, recovery, clinical outcomes, self-reported health                                                                                                                                                                                   | Acute ambulatory care-sensitive conditions, mobility, pain, emotion, activities of daily living, smoking, BMI, hypertension, hypercholesterolemia, self-reported health, glycemic control, diabetes control, frequency of hypoglycemic reactions, blood sugar, weight                                                                                                                                            | 21/15 |

1  
2  
3  
4  
5  
6  
7  
8  
9  
10  
11  
12  
13  
14  
15  
16  
17  
18  
19  
20  
21  
22  
23  
24  
25  
26  
27  
28  
29  
30  
31  
32  
33  
34  
35  
36  
37  
38  
39  
40  
41  
42  
43  
44  
45  
46  
47  
48  
49

|                                         |                                                   |                   |                                                                                                                                                                              |   |                                                                                        |                                                                                                                                                                                                                                                                                                                                                                                                                                                                                                                      |                                     |       |
|-----------------------------------------|---------------------------------------------------|-------------------|------------------------------------------------------------------------------------------------------------------------------------------------------------------------------|---|----------------------------------------------------------------------------------------|----------------------------------------------------------------------------------------------------------------------------------------------------------------------------------------------------------------------------------------------------------------------------------------------------------------------------------------------------------------------------------------------------------------------------------------------------------------------------------------------------------------------|-------------------------------------|-------|
| Arbuthnott et al. 2009 <sup>28</sup>    | Meta analysis, 1955-2007, All 48 studies included | Range of settings | Asthma, bacterial infection, fibromyalgia, diabetes, renal disease, hypertension, congestive heart failure, inflammatory bowel disease, breast cancer, HIV, and tuberculosis | P | Physician-patient collaboration (Observation, surveys)                                 | Medication adherence, behavioural adherence                                                                                                                                                                                                                                                                                                                                                                                                                                                                          | Appointment adherence               | 2/1   |
| Stewart 1995 <sup>74</sup>              | 1983-1993, 21 studies                             | Range of settings | Peptic ulcers, breast cancer, diabetes, hypertension, headache, coronary artery disease, gingivitis, tuberculosis, prostate cancer                                           | P | Physician-patient communication (Surveys, evaluation of audio- or videotape recording) | Peptic ulcer physical limitation, blood glucose levels, blood pressure, headache resolution, physician evaluation of symptom resolution for coronary artery disease, gingivitis and tuberculosis, anxiety level in gynecological care, radiation therapy, breast cancer care, functional status following radiation therapy for prostate cancer, anxiety after radiation therapy, pain levels and hospital length of stay after intra-abdominal surgery, physical and psychological complaints in breast cancer care | Details not included                | 16/5  |
| Zolnierok & DiMatteo 2009 <sup>26</sup> | Meta analysis 1949-2008, 127 studies              | Range of settings | No specific disease focus                                                                                                                                                    | P | Physician-patient communication (Observation, surveys)                                 | Adherence to treatment recommended by clinician                                                                                                                                                                                                                                                                                                                                                                                                                                                                      | Adherence (2 observational studies) | 125/2 |
| Beck et al. 2002 <sup>75</sup>          | 1975-2000, 5 out of 14                            | Primary care      | No specific disease focus                                                                                                                                                    | P | Physician-patient communication (Observation, evaluation of audio and video tapes)     | Compliance with doctors' advice, blood pressure, pill count                                                                                                                                                                                                                                                                                                                                                                                                                                                          | None                                | 10/0  |
| Cabana & Lee 2004 <sup>20</sup>         | 1966-2002, 7 out of 18                            | Range of settings | Rheumatoid arthritis, epilepsy, breast cancer, cervical cancer, diabetes                                                                                                     | P | Continuity of care (Validated measures of continuity e.g. SCOC)                        | Hospitalizations, length of stay, emergency department visits, intensive care days, preventive medicine visits, drug or alcohol abuse, outpatient attendance, glucose control for adults with diabetes                                                                                                                                                                                                                                                                                                               | None                                | 18/5  |
| Richards et al. 2006 <sup>76</sup>      | 1997-2002, 2 out of 33                            | Range of settings | Psoriasis                                                                                                                                                                    | P | Patient's perception of care, satisfaction, interpersonal skills (Surveys, interviews) | Treatment adherence, medication use                                                                                                                                                                                                                                                                                                                                                                                                                                                                                  | None                                | 2/0   |

## References

1. Institute of Medicine. *Crossing the Quality Chasm: a new health system for the 21st century*. Washington DC: National Academy Press, 2001.
2. Black N., Jenkinson C. Measuring patients experiences and outcomes. *BMJ* 2009;339.
3. Department of Health. *Liberating the NHS: Transparency in outcomes – a framework for the NHS*: Department of Health, 2010.
4. Darzi A. *High Quality Care For All – NHS Next Stage Review Final Report*: Department of Health 2008.
5. Department of Health. *Using the Commissioning for Quality and Innovation (CQUIN) payment framework*, 2008.
6. Berwick DM. What "Patient-Centered" Should Mean: Confessions Of An Extremist. *Health Affairs* 2009;28(4):w555-w65.
7. Street RL, Makoul G, Arora NK, Epstein RM. How does communication heal? Pathways linking clinician-patient communication to health outcomes. *Patient education and counseling* 2009;74(3):295-301.
8. Thom DH, Hall MA, Pawlson LG. Measuring Patients' Trust In Physicians When Assessing Quality Of Care. *Health Affairs* 2004;23(4):124-32.
9. Vincent CA, Coulter A. Patient safety: what about the patient? *Quality and Safety in Health Care* 2002;11(1):76-80.
10. Coulter A. *Engaging patients in healthcare*. Maidenhead Open University Press 2011.
11. Rathert C, Huddleston N, Pak Y. Acute care patients discuss the patient role in patient safety. *Health Care Management Review*;36(2):134-44  
10.1097/HMR.0b013e318208cd31.
12. Picker Institute. *Patient experience surveys: the rationale* Picker Institute Europe, 2008.
13. NICE. *Patient experience in adult NHS services: improving the experience of care for people using adult NHS services*: NICE, 2011.
14. López L., Weissman JS., Schneider EC., Weingart SN., Cohen AP., AM. E. Disclosure of hospital adverse events and its association with patients' ratings of the quality of care. *Arch Intern Med* 2009;169(20).
15. Safran DG., Taira DA., Rogers WH., Kosinski M., Ware JE., Tarlov AR. Linking primary care performance to outcomes of care. *Journal of Family Practice* 1998;47:213-20.
16. Robert Wood Johnson Foundation. *Good for Health, Good for Business: The Case for Measuring Patient Experience of Care*: The Center for Health Care Quality at the George Washington University Medical Center
17. Greenhalgh T., Peacock R. Effectiveness and efficiency of search methods in systematic reviews of complex evidence: audit of primary sources. *BMJ* 2005;331(7524):1064-65.
18. Fuertes J, Boylan L, Fontanella J. Behavioral Indices in Medical Care Outcome: The Working Alliance, Adherence, and Related Factors. *Journal of General Internal Medicine* 2009;24(1):80-85.
19. Raiz LR, Kilty KM, Henry ML, Ferguson RM. Medication Compliance Following Renal Transplantation. *Transplantation* 1999;68(1):51-55.
20. Cabana M., Jee S. Does continuity of care improve patient outcomes? *The Journal of Family Practice* 2004;53(12).
21. Plomondon M, Magid D, Masoudi F, Jones P, Barry L, Havranek E, et al. Association Between Angina and Treatment Satisfaction after Myocardial Infarction. *Journal of General Internal Medicine* 2008;23(1):1-6.
22. Jha AK, Orav EJ, Zheng J, Epstein AM. Patients' Perception of Hospital Care in the United States. *New England Journal of Medicine* 2008;359(18):1921-31.



- 1
- 2
- 3 23. Kaplan SH, Greenfield S, Ware JE. Assessing the effects of physician-patient interactions
- 4 on the outcomes of chronic disease. *Medical Care* 1989;27(3, Suppl):S110-S27.
- 5 24. Meterko M, Wright S, Lin H, Lowy E, Cleary PD. Mortality among Patients with Acute
- 6 Myocardial Infarction: The Influences of Patient-Centered Care and Evidence-Based
- 7 Medicine. *Health Services Research* 2010;45(5p1):1188-204.
- 8 25. Glickman SW, Boulding W, Manary M, Staelin R, Roe MT, Wolosin RJ, et al. Patient
- 9 Satisfaction and Its Relationship With Clinical Quality and Inpatient Mortality in
- 10 Acute Myocardial Infarction. *Circulation: Cardiovascular Quality and*
- 11 *Outcomes*;3(2):188-95.
- 12 26. Zolnierok H. KB, DiMatteo MR. Physician Communication and Patient Adherence to
- 13 Treatment: A Meta-Analysis. *Medical Care* 2009;47(8):826-34
- 14 10.1097/MLR.0b013e31819a5acc.
- 15 27. Drotar D. Physician Behavior in the Care of Pediatric Chronic Illness: Association With
- 16 Health Outcomes and Treatment Adherence. *Journal of Developmental & Behavioral*
- 17 *Pediatrics* 2009;30(3):246-54 10.1097/DBP.0b013e3181a7ed42.
- 18 28. Arbutnott A, Sharpe D. The effect of physician-patient collaboration on patient
- 19 adherence in non-psychiatric medicine. *Patient education and counseling*
- 20 2009;77(1):60-67.
- 21 29. Lewis ET, Combs A, Trafton JA. Reasons for Under-Use of Prescribed Opioid
- 22 Medications by Patients in Pain. *Pain Medicine* 2010;11(6):861-71.
- 23 30. Kahn KL, Schneider EC, Malin JL, Adams JL, Epstein AM. Patient Centered
- 24 Experiences in Breast Cancer: Predicting Long-Term Adherence to Tamoxifen Use.
- 25 *Medical Care* 2007;45(5):431-39 10.1097/01.mlr.0000257193.10760.7f.
- 26 31. Schneider EC, Zaslavsky AM, Landon BE, Lied TR, Sheingold S, Cleary PD. National
- 27 Quality Monitoring of Medicare Health Plans: The Relationship Between Enrollees'
- 28 Reports and the Quality of Clinical Care. *Medical Care* 2001;39(12):1313-25.
- 29 32. Schoenthaler A, Chaplin WF, Allegrante JP, Fernandez S, Diaz-Gloster M, Tobin JN, et
- 30 al. Provider communication effects medication adherence in hypertensive African
- 31 Americans. *Patient Education and Counseling* 2009;75(2):185-91.
- 32 33. Heisler M, Bouknight RR, Hayward RA, Smith DM, Kerr EA. The Relative Importance
- 33 of Physician Communication, Participatory Decision Making, and Patient
- 34 Understanding in Diabetes Self-management. *Journal of General Internal Medicine*
- 35 2002;17(4):243-52.
- 36 34. Haynes RB, Ackloo E, Sahota N, McDonald HP, X. Y. Interventions for enhancing
- 37 medication adherence. *Cochrane Database Syst Rev* 2008.
- 38 35. Sequist et al. Quality Monitoring of Physicians: Linking Patients' Experiences of Care to
- 39 Clinical Quality and Outcomes. *Journal of General Internal Medicine* 2008;23(11).
- 40 36. Flocke SA, Stange KC, Zyzanski SJ. The Association of Attributes of Primary Care With
- 41 the Delivery of Clinical Preventive Services. *Medical Care* 1998;36(8):AS21-AS30.
- 42 37. O'Malley AS, Sheppard VB, Schwartz M, Mandelblatt J. The role of trust in use of
- 43 preventive services among low-income African-American women. *Preventive*
- 44 *Medicine: An International Journal Devoted to Practice and Theory* 2004;38(6):777-
- 45 85.
- 46 38. Carcaise-Edinboro P, Bradley CJ. Influence of Patient-Provider Communication on
- 47 Colorectal Cancer Screening. *Medical Care* 2008;46(7):738-45
- 48 10.1097/MLR.0b013e318178935a.
- 49 39. Jackson CA, Clatworthy J, Robinson A, Horne R. Factors Associated With Non-
- 50 Adherence to Oral Medication for Inflammatory Bowel Disease: A Systematic
- 51 Review. *Am J Gastroenterol* 2010;105(3):525-39.
- 52
- 53
- 54
- 55
- 56
- 57
- 58
- 59
- 60

- 1
  - 2
  - 3
  - 4
  - 5
  - 6
  - 7
  - 8
  - 9
  - 10
  - 11
  - 12
  - 13
  - 14
  - 15
  - 16
  - 17
  - 18
  - 19
  - 20
  - 21
  - 22
  - 23
  - 24
  - 25
  - 26
  - 27
  - 28
  - 29
  - 30
  - 31
  - 32
  - 33
  - 34
  - 35
  - 36
  - 37
  - 38
  - 39
  - 40
  - 41
  - 42
  - 43
  - 44
  - 45
  - 46
  - 47
  - 48
  - 49
  - 50
  - 51
  - 52
  - 53
  - 54
  - 55
  - 56
  - 57
  - 58
  - 59
  - 60
40. Clark NM, Cabana MD, Nan B, Gong ZM, Slish KK, Birk NA, et al. The Clinician-Patient Partnership Paradigm: Outcomes Associated With Physician Communication Behavior. *Clinical Pediatrics* 2008;47(1):49-57.
41. Stewart M., Brown J., Donner A., McWhinney I., Oates J., Weston W., et al. The Impact of Patient-Centered Care on Outcomes. *Journal of Family Practice* 2000;49(9).
42. Sans-Corrales M, Pujol-Ribera E, GenÃ©-Badia J, PasarÃ©n-Rua MI, Iglesias-PÃ©rez Ba, Casajuana-Brunet J. Family medicine attributes related to satisfaction, health and costs. *Family Practice* 2006;23(3):308-16.
43. Saultz JW, Lochner J. Interpersonal Continuity of Care and Care Outcomes: A Critical Review. *The Annals of Family Medicine* 2005;3(2):159-66.
44. Hsiao C-J, Boulton C. Effects of Quality on Outcomes in Primary Care: A Review of the Literature. *American Journal of Medical Quality* 2008;23(4):302-10.
45. Isaac T, Zaslavsky AM, Cleary PD, Landon BE. The Relationship between Patients' Perception of Care and Measures of Hospital Quality and Safety. *Health Services Research* 2010;45(4):1024-40.
46. Rao M, Clarke A., Sanderson C., Hammersley R. Patients' Own Assessments of Quality of Primary Care Compared with Objective Records Based Measures of Technical Quality of Care: Cross Sectional Study. *BMJ* 2006;333(7797).
47. Chang JT, Hays RD, Shekelle PG, MacLean CH, Solomon DH, Reuben DB, et al. Patients' global ratings of their health care are not associated with the technical quality of their care. *Ann Intern Med* 2006;145(8):635-6.
48. Weingart SN, Pagovich O, Sands DZ, Li JM, Aronson MD, Davis RB, et al. What Can Hospitalized Patients Tell Us About Adverse Events? Learning from Patient-Reported Incidents. *Journal of General Internal Medicine* 2005;20(9):830-36.
49. Weissman JS, Schneider EC, Weingart SN, Epstein AM, David-Kasdan J, Feibelmann S, et al. Comparing Patient-Reported Hospital Adverse Events with Medical Record Review: Do Patients Know Something That Hospitals Do Not? *Annals of Internal Medicine* 2008;149(2):100-08.
50. Solberg LI, Asche SE, Averbek BM, Hayek AM, Schmitt KG, Lindquist TC, et al. Can Patient Safety Be Measured by Surveys of Patient Experiences? *Joint Commission Journal on Quality and Patient Safety* 2008;34(5):266-74.
51. O'Connor AM, Bennett CL, Stacey D, Barry M, Col NF, Eden KB, et al. Decision aids for people facing health treatment or screening decisions. *Cochrane database of systematic reviews (Online)* 2009(3):CD001431.
52. Mumford E, Schlesinger HJ, Glass GV. The effect of psychological intervention on recovery from surgery and heart attacks: an analysis of the literature. *American Journal of Public Health* 1982;72(2):141-51.
53. Begg C., Berlin J., N. J., . Publication Bias: A Problem in Interpreting Medical Data *Journal of the Royal Statistical Society. Series A (Statistics in Society)* 1988;151(3).
54. Burgers JS, Voerman GE, Grol R, Faber MJ, Schneider EC. Quality and Coordination of Care for Patients With Multiple Conditions: Results From an International Survey of Patient Experience. *Evaluation & the Health Professions* 2010;33(3):343-64.
55. Vincent C. Understanding and Responding to Adverse Events. *New England Journal of Medicine* 2003;348(11):1051-56.
56. Agoritsas T, Bovier PA, Perneger TV. Patient Reports of Undesirable Events During Hospitalization. *Journal of General Internal Medicine* 2005;20(10):922-28.
57. Jackson JL, Chamberlin J, Kroenke K. Predictors of patient satisfaction. *Social Science & Medicine* 2001;52(4).

- 1
- 2
- 3 58. Safran DG., Miller W., Beckman H. Organizational Dimensions of Relationship-centred
- 4 care. *Journal of General Internal Medicine* 2005;21:S9-15.
- 5 59. Alamo M, Moral RR, Párrula de Torres LA. Evaluation of a patient-centred
- 6 approach in generalized musculoskeletal chronic pain/fibromyalgia patients in
- 7 primary care. *Patient education and counseling* 2002;48(1):23-31.
- 8 60. Fan VS, Reiber GE, Diehr P, Burman M, McDonell MB, Fihn SD. Functional Status and
- 9 Patient Satisfaction. *Journal of General Internal Medicine* 2005;20(5):452-59.
- 10 61. Little P., Everitt H., Williamson I., Warner G., Moore M., Gould C., et al. Observational
- 11 study of effect of patient centredness and positive approach on outcomes of general
- 12 practice consultations. *BMJ* 2001;323(7318):908-11.
- 13 62. Levinson W, Roter DL, Mullooly JP, Dull VT, Frankel RM. Physician-Patient
- 14 Communication: The Relationship With Malpractice Claims Among Primary Care
- 15 Physicians and Surgeons. *JAMA: The Journal of the American Medical Association*
- 16 1997;277(7):553-59.
- 17 63. Slatore, Christopher G, Cecere, Laura M, Reinke, Lynn F, et al. *Patient-Clinician*
- 18 *Communication: Associations With Important Health Outcomes Among Veterans*
- 19 *With COPD*. Northbrook, IL, ETATS-UNIS: American College of Chest Physicians,
- 20 2010.
- 21 64. Lee Y-Y, Lin JL. The effects of trust in physician on self-efficacy, adherence and
- 22 diabetes outcomes. *Social Science & Medicine* 2009;68(6):1060-68.
- 23 65. Lee Y-Y, Lin JL. Do patient autonomy preferences matter? Linking patient-centered care
- 24 to patient-physician relationships and health outcomes. *Social Science & Medicine*
- 25 2010;71(10):1811-18.
- 26 66. Kennedy A, Nelson E, Reeves D, Richardson G, Roberts C, Robinson A, et al. A
- 27 randomised controlled trial to assess the impact of a package comprising a patient-
- 28 orientated, evidence-based self-help guidebook and patient-centred consultations on
- 29 disease management and satisfaction in inflammatory bowel disease. *Health*
- 30 *technology assessment (Winchester, England)* 2003;7(28):iii, 1-113.
- 31 67. Kinnersley P, Stott N, Peters TJ, Harvey I. The patient-centredness of consultations and
- 32 outcome in primary care. *British Journal of General Practice* 1999;49(446):711-16.
- 33 68. Fremont A, Cleary P, Hargraves J, Rowe R, Jacobson N, Ayanian J. Patient-centered
- 34 processes of care and long-term outcomes of myocardial infarction. *Journal of*
- 35 *General Internal Medicine* 2001;16(12):800-08.
- 36 69. Riley DL, Stewart DE, Grace SL. Continuity of cardiac care: Cardiac rehabilitation
- 37 participation and other correlates. *International Journal of Cardiology*
- 38 2007;119(3):326-33.
- 39 70. Blasi ZD, Harkness E, Ernst E, Georgiou A, Kleijnen J. Influence of context effects on
- 40 health outcomes: a systematic review. *The Lancet* 2001;357(9258):757-62.
- 41 71. Hall AM, Ferreira PH, Maher CG, Latimer J, Ferreira ML. The Influence of the
- 42 Therapist-Patient Relationship on Treatment Outcome in Physical Rehabilitation: A
- 43 Systematic Review. *Physical Therapy* 2010;90(8):1099-110.
- 44 72. Stevenson FA, Cox K, Britten N, Dundar Y. A systematic review of the research on
- 45 communication between patients and health care professionals about medicines: the
- 46 consequences for concordance. *Health Expectations* 2004;7(3):235-45.
- 47 73. Hall JA, Roter DL, Katz NR. Meta-analysis of correlates of provider behavior in medical
- 48 encounters. *Medical Care* 1988;26(7):657-75.
- 49 74. Stewart MA. Effective physician-patient communication and health outcomes: a review.
- 50 *Canadian Medical Association Journal* 1995;152(9):1423-33.
- 51
- 52
- 53
- 54
- 55
- 56
- 57
- 58
- 59
- 60

- 1  
2  
3 75. Beck RS, Daughtridge R, Sloane PD. Physician-patient communication in the primary  
4 care office: a systematic review. *The Journal of the American Board of Family*  
5 *Practice* 2002;15(1):25-38.  
6  
7 76. Richards HL, Fortune DG, Griffiths CEM. Adherence to treatment in patients with  
8 psoriasis. *Journal of the European Academy of Dermatology and Venereology*  
9 2006;20(4):370-79.  
10  
11  
12  
13  
14  
15  
16  
17  
18  
19  
20  
21  
22  
23  
24  
25  
26  
27  
28  
29  
30  
31  
32  
33  
34  
35  
36  
37  
38  
39  
40  
41  
42  
43  
44  
45  
46  
47  
48  
49  
50  
51  
52  
53  
54  
55  
56  
57  
58  
59  
60

1  
2  
3  
4  
5  
6  
7  
8  
9  
10  
11  
12  
13  
14  
15  
16  
17  
18  
19  
20  
21  
22  
23  
24  
25  
26  
27  
28  
29  
30  
31  
32  
33  
34  
35  
36  
37  
38  
39  
40  
41  
42  
43  
44  
45  
46  
47  
48  
49  
50  
51  
52  
53  
54  
55  
56  
57  
58  
59  
60

Chart 1: Disease areas covered

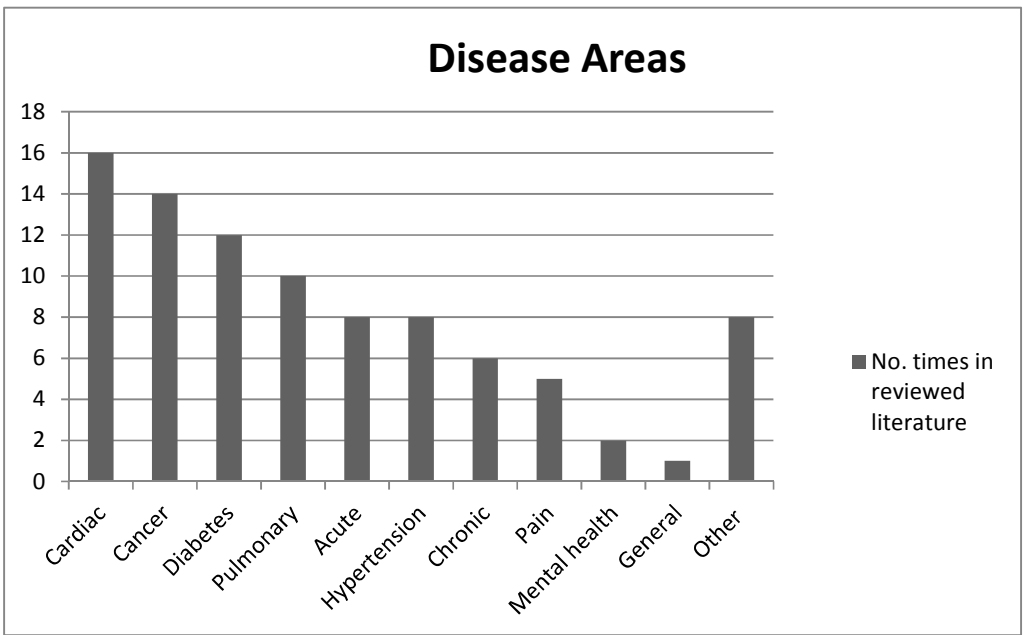

For peer review only

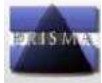

# PRISMA 2009 Checklist

1  
2  
3  
4  
5  
6  
7  
8  
9  
10  
11  
12  
13  
14  
15  
16  
17  
18  
19  
20  
21  
22  
23  
24  
25  
26  
27  
28  
29  
30  
31  
32  
33  
34  
35  
36  
37  
38  
39  
40  
41  
42  
43  
44  
45  
46  
47  
48  
49

| Section/topic                      | #  | Checklist item                                                                                                                                                                                                                                                                                              | Reported on page # |
|------------------------------------|----|-------------------------------------------------------------------------------------------------------------------------------------------------------------------------------------------------------------------------------------------------------------------------------------------------------------|--------------------|
| <b>TITLE</b>                       |    |                                                                                                                                                                                                                                                                                                             |                    |
| Title                              | 1  | Identify the report as a systematic review, meta-analysis, or both.                                                                                                                                                                                                                                         | 1                  |
| <b>ABSTRACT</b>                    |    |                                                                                                                                                                                                                                                                                                             |                    |
| Structured summary                 | 2  | Provide a structured summary including, as applicable: background; objectives; data sources; study eligibility criteria, participants, and interventions; study appraisal and synthesis methods; results; limitations; conclusions and implications of key findings; systematic review registration number. | 2                  |
| <b>INTRODUCTION</b>                |    |                                                                                                                                                                                                                                                                                                             |                    |
| Rationale                          | 3  | Describe the rationale for the review in the context of what is already known.                                                                                                                                                                                                                              | 4                  |
| Objectives                         | 4  | Provide an explicit statement of questions being addressed with reference to participants, interventions, comparisons, outcomes, and study design (PICOS).                                                                                                                                                  | 4                  |
| <b>METHODS</b>                     |    |                                                                                                                                                                                                                                                                                                             |                    |
| Protocol and registration          | 5  | Indicate if a review protocol exists, if and where it can be accessed (e.g., Web address), and, if available, provide registration information including registration number.                                                                                                                               | n/a                |
| Eligibility criteria               | 6  | Specify study characteristics (e.g., PICOS, length of follow-up) and report characteristics (e.g., years considered, language, publication status) used as criteria for eligibility, giving rationale.                                                                                                      | 6-7                |
| Information sources                | 7  | Describe all information sources (e.g., databases with dates of coverage, contact with study authors to identify additional studies) in the search and date last searched.                                                                                                                                  | 4-6                |
| Search                             | 8  | Present full electronic search strategy for at least one database, including any limits used, such that it could be repeated.                                                                                                                                                                               | 5-6                |
| Study selection                    | 9  | State the process for selecting studies (i.e., screening, eligibility, included in systematic review, and, if applicable, included in the meta-analysis).                                                                                                                                                   | 6-7                |
| Data collection process            | 10 | Describe method of data extraction from reports (e.g., piloted forms, independently, in duplicate) and any processes for obtaining and confirming data from investigators.                                                                                                                                  | 6                  |
| Data items                         | 11 | List and define all variables for which data were sought (e.g., PICOS, funding sources) and any assumptions and simplifications made.                                                                                                                                                                       | 6-7                |
| Risk of bias in individual studies | 12 | Describe methods used for assessing risk of bias of individual studies (including specification of whether this was done at the study or outcome level), and how this information is to be used in any data synthesis.                                                                                      | 7,13-20            |
| Summary measures                   | 13 | State the principal summary measures (e.g., risk ratio, difference in means).                                                                                                                                                                                                                               | n/a                |
| Synthesis of results               | 14 | Describe the methods of handling data and combining results of studies, if done, including measures of consistency (e.g., $I^2$ for each meta-analysis).                                                                                                                                                    | n/a                |





# PRISMA 2009 Checklist

Page 1 of 2

| Section/topic                 | #  | Checklist item                                                                                                                                                                                           | Reported on page # |
|-------------------------------|----|----------------------------------------------------------------------------------------------------------------------------------------------------------------------------------------------------------|--------------------|
| Risk of bias across studies   | 15 | Specify any assessment of risk of bias that may affect the cumulative evidence (e.g., publication bias, selective reporting within studies).                                                             | 11                 |
| Additional analyses           | 16 | Describe methods of additional analyses (e.g., sensitivity or subgroup analyses, meta-regression), if done, indicating which were pre-specified.                                                         | n/a                |
| <b>RESULTS</b>                |    |                                                                                                                                                                                                          |                    |
| Study selection               | 17 | Give numbers of studies screened, assessed for eligibility, and included in the review, with reasons for exclusions at each stage, ideally with a flow diagram.                                          | 4-7                |
| Study characteristics         | 18 | For each study, present characteristics for which data were extracted (e.g., study size, PICOS, follow-up period) and provide the citations.                                                             | 13-20              |
| Risk of bias within studies   | 19 | Present data on risk of bias of each study and, if available, any outcome level assessment (see item 12).                                                                                                | 11                 |
| Results of individual studies | 20 | For all outcomes considered (benefits or harms), present, for each study: (a) simple summary data for each intervention group (b) effect estimates and confidence intervals, ideally with a forest plot. | 13-20              |
| Synthesis of results          | 21 | Present results of each meta-analysis done, including confidence intervals and measures of consistency.                                                                                                  | n/a                |
| Risk of bias across studies   | 22 | Present results of any assessment of risk of bias across studies (see Item 15).                                                                                                                          | 11                 |
| Additional analysis           | 23 | Give results of additional analyses, if done (e.g., sensitivity or subgroup analyses, meta-regression [see Item 16]).                                                                                    | n/a                |
| <b>DISCUSSION</b>             |    |                                                                                                                                                                                                          |                    |
| Summary of evidence           | 24 | Summarize the main findings including the strength of evidence for each main outcome; consider their relevance to key groups (e.g., healthcare providers, users, and policy makers).                     | 9-11               |
| Limitations                   | 25 | Discuss limitations at study and outcome level (e.g., risk of bias), and at review-level (e.g., incomplete retrieval of identified research, reporting bias).                                            | 11                 |
| Conclusions                   | 26 | Provide a general interpretation of the results in the context of other evidence, and implications for future research.                                                                                  | 11                 |
| <b>FUNDING</b>                |    |                                                                                                                                                                                                          |                    |
| Funding                       | 27 | Describe sources of funding for the systematic review and other support (e.g., supply of data); role of funders for the systematic review.                                                               | 21                 |

From: Moher D, Liberati A, Tetzlaff J, Altman DG, The PRISMA Group (2009). Preferred Reporting Items for Systematic Reviews and Meta-Analyses: The PRISMA Statement. PLoS Med 6(6): e1000097. doi:10.1371/journal.pmed1000097

For more information, visit: [www.prisma-statement.org](http://www.prisma-statement.org).

Page 2 of 2

For peer review only - <http://bmjopen.bmj.com/site/about/guidelines.xhtml>

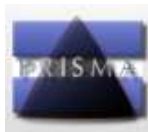

# PRISMA 2009 Flow Diagram

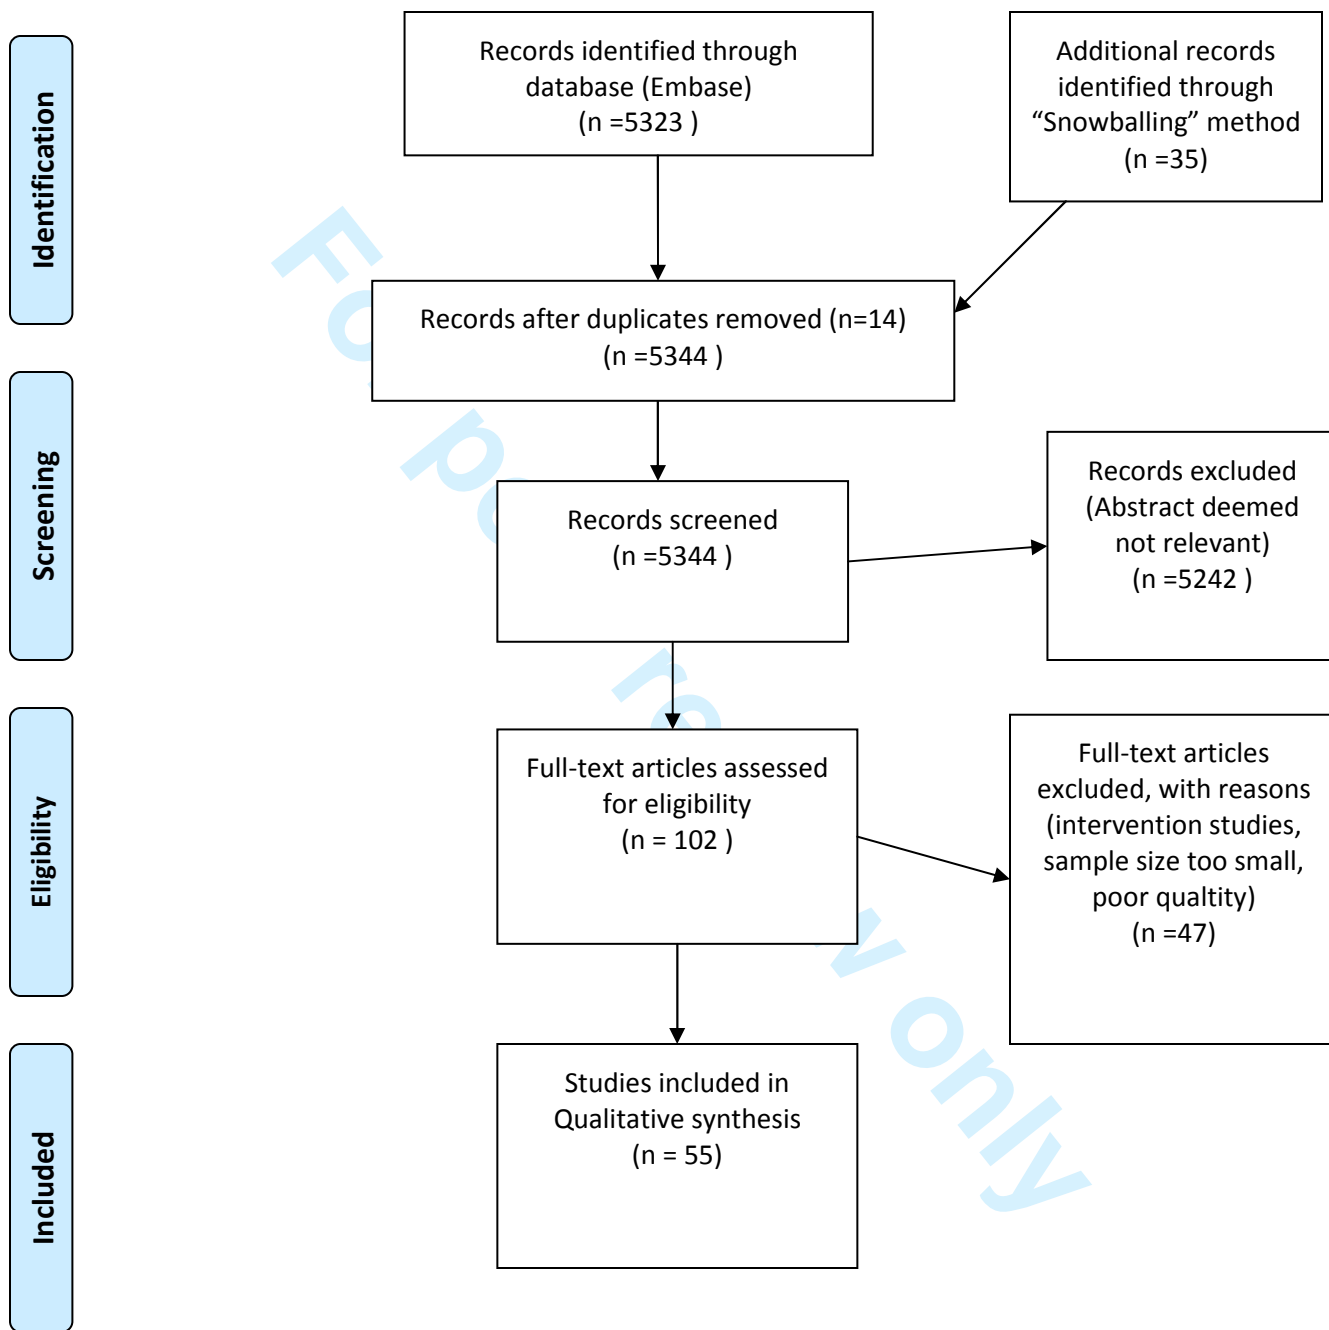

From: Moher D, Liberati A, Tetzlaff J, Altman DG, The PRISMA Group (2009). Preferred Reporting Items for Systematic Reviews and Meta-Analyses: The PRISMA Statement. PLoS Med 6(6): e1000097. doi:10.1371/journal.pmed1000097

For more information, visit [www.prisma-statement.org](http://www.prisma-statement.org).

For peer review only - <http://bmjopen.bmj.com/site/about/guidelines.xhtml>





**A review of evidence on the links between patient experience and clinical safety and effectiveness**

|                                    |                                                                                                                                                                                                                                               |
|------------------------------------|-----------------------------------------------------------------------------------------------------------------------------------------------------------------------------------------------------------------------------------------------|
| Journal:                           | <i>BMJ Open</i>                                                                                                                                                                                                                               |
| Manuscript ID:                     | bmjopen-2012-001570.R2                                                                                                                                                                                                                        |
| Article Type:                      | Research                                                                                                                                                                                                                                      |
| Date Submitted by the Author:      | 02-Nov-2012                                                                                                                                                                                                                                   |
| Complete List of Authors:          | Doyle, Cathal; NIHR CLAHRC for NWL, Medicine<br>Lennox, Laura; CLAHRC for NWL, Medicine<br>Bell, Derek; NIHR CLAHRC for NWL, Medicine; Imperial College, Acute<br>Medicine                                                                    |
| <b>Primary Subject<br>Heading</b>: | Patient-centred medicine                                                                                                                                                                                                                      |
| Secondary Subject Heading:         | Health services research                                                                                                                                                                                                                      |
| Keywords:                          | Health & safety < HEALTH SERVICES ADMINISTRATION & MANAGEMENT,<br>Quality in health care < HEALTH SERVICES ADMINISTRATION &<br>MANAGEMENT, Health policy < HEALTH SERVICES ADMINISTRATION &<br>MANAGEMENT, patient experience, Patient safety |
|                                    |                                                                                                                                                                                                                                               |

SCHOLARONE™  
Manuscripts

|                               |                                                                                                                                                                                                                                                                                                                                                                                                                                                                                                                                                                                                                                                                              |
|-------------------------------|------------------------------------------------------------------------------------------------------------------------------------------------------------------------------------------------------------------------------------------------------------------------------------------------------------------------------------------------------------------------------------------------------------------------------------------------------------------------------------------------------------------------------------------------------------------------------------------------------------------------------------------------------------------------------|
| <b>Title</b>                  | A review of evidence on the links between patient experience and clinical safety and effectiveness                                                                                                                                                                                                                                                                                                                                                                                                                                                                                                                                                                           |
| <b>Authors</b>                | <p>Cathal Doyle- Program Lead for Evaluation, NIHR CLAHRC for North West London<sup>1</sup></p> <p>Laura Lennox- Research Assistant, NIHR CLAHRC for North West London<sup>1</sup> and Imperial College London<sup>2</sup></p> <p>Derek Bell- Professor of Acute Medicine, NIHR CLAHRC for North West London<sup>1</sup> and Imperial College London<sup>2</sup></p> <p><sup>1, 2</sup> Chelsea and Westminster Hospital, 369 Fulham Road, London, SW10 9NH, UK</p>                                                                                                                                                                                                          |
| <b>Corresponding Author</b>   | <p>Name: Cathal Doyle</p> <p>Address: CLAHRC NWL, Floor 4 Lift Bank D, Chelsea &amp; Westminster Hospital, 369 Fulham Road, London, SW10 9NH, UK</p> <p>Email: c.doyle@imperial.ac.uk</p> <p>Telephone (office): 0203 315 3392</p> <p>"The Corresponding Author has the right to grant on behalf of all authors and does grant on behalf of all authors, an exclusive licence (or non exclusive for government employees) on a worldwide basis to the BMJ Publishing Group Ltd to permit this article (if accepted) to be published in BMJ editions and any other BMJPG products and sublicences such use and exploit all subsidiary rights, as set out in our licence."</p> |
| <b>Keywords:</b>              | Health & safety, Quality in healthcare, Health policy, Patient experience, Patient safety                                                                                                                                                                                                                                                                                                                                                                                                                                                                                                                                                                                    |
| <b>Word Count</b>             | 2752                                                                                                                                                                                                                                                                                                                                                                                                                                                                                                                                                                                                                                                                         |
| <b>Funding and Disclaimer</b> | <p>NIHR CLAHRC for North West London</p> <p>Disclaimer: This article presents independent research commissioned by the National Institute for Health Research (NIHR) under the Collaborations for Leadership in Applied Health Research and Care (CLAHRC) programme for North West London. The views expressed in this publication are those of the author(s) and not necessarily those of the NHS, the NIHR or the Department of Health.</p>                                                                                                                                                                                                                                |

## Abstract

Objective: To explore evidence on the links between patient experience and clinical safety and effectiveness outcomes.

Design: Systematic review

Setting: A wide range of settings within primary and secondary care including hospitals and primary care centres.

Participants: A wide range of demographic groups and age groups.

Primary and secondary outcome measures: A broad range of patient safety and clinical effectiveness outcomes including mortality, physical symptoms, length of stay and adherence to treatment.

Results: This study, summarizing evidence from 55 studies, indicates consistent positive associations between patient experience, patient safety and clinical effectiveness for a wide range of disease areas, settings, outcome measures and study designs. It demonstrates positive associations between patient experience and self-rated and objectively measured health outcomes; adherence to recommended clinical practice and medication; preventive care (such as health-promoting behavior, use of screening services and immunization); and resource use (such as hospitalization, length of stay and primary care visits). There is some evidence of positive associations between patient experience and measures of the technical quality of care and adverse events. Overall it was more common to find positive associations between patient experience and patient safety and clinical effectiveness than no associations.

Conclusion: The data presented show positive associations between patient experience and clinical effectiveness and patient safety and supports the case for the inclusion of patient experience as one of the central pillars of quality in health care. It supports the argument that the three dimensions of quality should be looked at as a group and not in isolation. Clinicians should resist sidelining patient experience as too subjective or mood-orientated, divorced from the 'real' clinical work of measuring safety and effectiveness.

Trial registration: This review was not registered.

## Article Summary

### Article focus:

- Should patient experience, as advocated by the Institute of Medicine and the NHS Outcomes Framework, be seen as one of the pillars of quality in health care alongside patient safety and clinical effectiveness?
- What aspects of patient experience can be linked to clinical effectiveness and patient safety outcomes?
- What evidence is available on the links between patient experience and clinical effectiveness and patient safety outcomes?

### Key Messages:

- The results show that patient experience is consistently positively associated with patient safety and clinical effectiveness across a wide range of disease areas, study designs, settings, population groups and outcome measures.
- Patient experience is positively associated with: self-rated and objectively measured health outcomes; adherence to recommended medication and treatments; preventative care such as use of screening services and immunizations; healthcare resource use such as hospitalization and primary care visits; technical quality of care delivery and adverse events.
- This study supports the argument that patient experience, clinical effectiveness and patient safety are linked and should be looked at as a group.

### Strengths and limitations of this study:

- This study demonstrates an approach to designing a systematic review for the 'catch-all' term patient experience, and brings together evidence from a variety of sources that may otherwise remain dispersed.
- This was a time-limited review and there is scope to expand this search based on the results and broaden the search terms to uncover further evidence.

## Introduction

Patient experience is increasingly recognized as one of the three pillars of quality in healthcare alongside clinical effectiveness and patient safety.<sup>1</sup> In the NHS the measurement of patient experience data to identify strengths and weaknesses of health care delivery, drive quality improvement, inform commissioning and promote patient choice is now mandatory.<sup>2 3 4</sup> In addition to data on harm avoidance or success rates for treatments, providers are now assessed on aspects of care such as dignity and respect, compassion and involvement in care decisions.<sup>4</sup> In England these data are published in Quality Accounts and the Commissioning for Quality & Innovation (CQUINs) payment framework which makes a proportion of care providers' income conditional on improvement in this domain.<sup>5</sup>

The inclusion of patient experience as a pillar of quality is often justified on the grounds of its intrinsic value – that the expectation of humane, empathic care is a given and requires no further justification. It is also justified on more utilitarian grounds as a means of improving patient safety and clinical effectiveness.<sup>6 7</sup> For example, clear information, empathic, two-way communication and respect for patients' beliefs and concerns could lead to patients being more informed and involved in decision making and create an environment where patients are more willing to disclose information. Patients could have more 'ownership' of clinical decisions, entering a 'therapeutic alliance' with clinicians. This could support improved and more timely diagnosis, clinical decisions and advice and lead to fewer unnecessary referrals or diagnostic tests.<sup>8 9</sup> Increased patient agency can encourage greater participation in personal care, compliance with medication, adherence to recommended treatment, and monitoring of prescriptions and dose.<sup>9 10</sup> Patients can be informed about what to expect from treatment and be motivated to report adverse events or complications and keep a list of their medical histories, allergies, and current medications.<sup>11</sup>

Patients' direct experience of care process through clinical encounters or as an observer (for example, as a patient on a hospital ward) can provide valuable insights into everyday care. Examples include attention to pain control, assistance with bathing or help with feeding, the environment (cleanliness, noise, physical safety) and coordination of care between professions or organizations. Given the organizational fragmentation of much of healthcare and the numerous services with which many patients interact, the measurement of patient experience may help provide a 'whole system' perspective not readily available from more discrete patient safety and clinical effectiveness measures.<sup>11</sup>

Focusing on such utilitarian arguments, this study reviews evidence on links that have been demonstrated between patient experience and clinical effectiveness and patient safety.

## Methods

### *Identifying variables relevant to patient experience*

Patient experience is a term that encapsulates a number of dimensions and in preliminary database searches this phrase on its own uncovered a limited number of useful studies. To broaden and structure the search for evidence, identify search terms and provide a framework for analysis it was necessary to identify what patient experience entails and outline potential mechanisms through which it is proposed to impact on safety and effectiveness. As such, we combined common elements from patient experience frameworks produced by The Institute of Medicine<sup>1</sup>, Picker Institute<sup>12</sup> and NICE.<sup>13</sup>

Table 1 delineates different dimensions of patient experience and distinguishes between 'relational' and 'functional' aspects.<sup>10 14</sup> Relational aspects refer to interpersonal aspects of care – the ability of clinicians to empathise, respect the preferences of patients, include them in decision making and

provide information to enable self-care.<sup>10</sup> It also refers to patients' expectations that professionals will put their interest above other considerations and be honest and transparent when something goes wrong.<sup>8 15</sup> Functional aspects relate to basic expectations about how care is delivered, such as attention to physical needs, timeliness of care, clean and safe environments, effective coordination between professionals and continuity.

**Table 1: Identifying aspects of patient experience and search terms**

| <b>Relational aspects</b>                                                                                                                                                                           | <b>Functional aspects</b>                                                                               |
|-----------------------------------------------------------------------------------------------------------------------------------------------------------------------------------------------------|---------------------------------------------------------------------------------------------------------|
| Emotional and psychological support, relieving fear and anxiety, treated with respect, kindness, dignity, compassion, understanding                                                                 | Effective treatment delivered by trusted professionals                                                  |
| Participation of patient in decisions and respect and understanding for beliefs, values, concerns, preferences and their understanding of their condition                                           | Timely, tailored and expert management of physical symptoms                                             |
| Involvement of, and support for family and carers in decisions                                                                                                                                      | Attention to physical support needs and environmental needs (e.g. clean, safe, comfortable environment) |
| Clear, comprehensible information and communication tailored to patient needs to support informed decisions (awareness of available options, risks and benefits of treatments) and enable self-care | Coordination and continuity of care; smooth transitions from one setting to another                     |
| Transparency, honesty, disclosure when something goes wrong                                                                                                                                         |                                                                                                         |

Using these frameworks and discursive documents in this area of research<sup>10 16 17 9</sup> as a guide we identified words and phrases commonly used to denote aspects of patient experience, examples of which are listed in Table 2.

**Table 2: Search terms denoting patient experience:**

patient-centred care; patient engagement; clinical interaction; patient-clinician; clinician-patient; patient-doctor; doctor-patient; physician-patient; patient-physician; patient-provider; interpersonal treatment; physician discussion; trust in physician; empathy; compassion; respect; responsiveness; patient preferences; shared decision making; therapeutic alliance; participation in decisions; decision making; autonomy; caring; kindness; dignity; honesty; participation; right to decide; physical comfort; involvement (of family, carers, friends); emotional support; continuity (of care); smooth transition; emotional support;

1  
2  
3 These were combined with search terms representing patient safety and clinical effectiveness  
4 outcomes hypothesized to be associated with patient experience in discursive literature. We  
5 searched for a broad range of outcome measures, including both self-rated and 'objective'  
6 measurements of health status, physical and mental health and wellbeing, the use of preventive  
7 health services, compliance or adherence to health-promoting behavior and resource use.  
8

9  
10 Combining these two sets of search terms in the EMBASE database, we identified 5323 papers  
11 whose abstracts were then reviewed. If deemed relevant the full article was retrieved to assess  
12 whether it met the inclusion criteria.

13  
14 (REVISED TEXT) Given concerns about the sole use of protocol-driven search strategies for complex  
15 evidence,<sup>18</sup> for the full text articles retrieved for review, we used a 'snowballing' approach to  
16 identify further studies. This involved sourcing further articles in these studies for assessment and  
17 using the 'related articles' function in the PubMed database. We repeated this for new articles  
18 identified until the approach ceased to identify new studies.  
19

#### 20 21 *Inclusion criteria, assessment of quality and categorisation of evidence*

22 We included studies that measured associations between patients' reporting of their experience and  
23 patient safety and clinical effectiveness outcomes. These included studies measuring associations  
24 between patient experience and safety or effectiveness outcomes either at a patient level (i.e data  
25 on both types of variables for the same patients) or at an organizational level (i.e. associations  
26 between aggregated measures of patient experience and safety and effectiveness outcomes for the  
27 same type of organisation such as a hospital or primary care practice).  
28

29  
30 We included studies where the variables denoting patient experience and patient safety and clinical  
31 effectiveness were measured in a credible way, through the use of validated tools. For patient  
32 experience variables these include surveys covering several aspects of experience (such as Picker  
33 Surveys and the Hospital Consumer Assessment of Healthcare Providers and Systems survey) and  
34 specific aspects (such as a 'Working Alliance Scale'<sup>19</sup>, Multidimensional Health Locus of Control  
35 Scale (MHLC) scale<sup>20</sup> or Usual Provider Continuity (UPC) index<sup>21</sup>). For patient safety and clinical  
36 effectiveness these include, for example, generic health and quality of life surveys (such as Short-  
37 Form 36 (SF36)), disease-specific surveys (such as the Seattle Angina Questionnaire<sup>22</sup>), measures of  
38 the technical quality of care (such as the Hospital Quality Alliance (HQA) score), reviews of medical  
39 records and care provider data.<sup>23</sup> Details of the methods used to measure variables in each study are  
40 included in Tables 6 and 7.  
41

42  
43 We included studies where the sample size of patients or organizations appeared sufficiently large to  
44 conduct meaningful statistical analysis (excluding studies with fewer than 50 subjects). When  
45 extracting data relevant to our study from systematic reviews we selected only those studies that  
46 met these criteria.  
47

48 (REVISED TEXT) We then searched the studies' results for positive associations (where a better  
49 patient experience is associated with safer or more effective care), negative associations (where a  
50 better patient experience is associated with less safe or less effective care) and no associations.  
51 Associations refer to cases where one measure of patient experience (typically an overall rating of  
52 patient experience for a care provider) has a statistically significant association with one or more  
53 clinical effectiveness or patient safety variable. If a study showed associations between several  
54 aspects of patient experience that appeared to be closely related (for example, 'listening',  
55 'empathy', or 'respect') and an aspect of effectiveness or safety, this was counted as one association  
56 found. This was to avoid exaggerating the weight of the evidence by 'over counting' associations.  
57  
58  
59  
60

Two main types of studies emerged in the search – those focusing on interventions to improve aspects of patient experience and those exploring associations between patient experience variables and patient safety and clinical effectiveness variables. To manage the scope of this time-limited review we decided to restrict analysis of the large number of interventions to the evidence contained within systematic reviews.

### Results

Overall, the evidence indicates positive associations between patient experience and patient safety and clinical effectiveness that appear consistent across a range of disease areas, study designs, settings, population groups and outcome measures. Positive associations found outweigh 'no associations' by 429 to 127. Of the four studies where 'no associations' outweigh positive associations there is no suggestion that these are methodologically superior. (REVISED TEXT) Negative associations were rare. Of the 40 individual studies assessed in Table 6 negative associations (between patient experience of clinical team interactions and continuity of care and separate assessment of the quality of clinical care) were found in only one study.<sup>24</sup>

Table 3 shows surveys to be the predominant method used to measure variables for individual studies.

**Table 3: Methods used to measure variables**

|                                                                   | No of studies |
|-------------------------------------------------------------------|---------------|
| <b>Patient experience variables</b>                               |               |
| Survey                                                            | 31            |
| Interviews                                                        | 2             |
| Medical records                                                   | 1             |
| <b>Effectiveness &amp; safety variables</b>                       |               |
| Survey for self-rated healthcare                                  | 12            |
| Other survey                                                      | 14            |
| Medical records                                                   | 3             |
| Data monitoring quality of care delivery (e.g. audit, HQA, HEDIS) | 3             |
| Care provider outcome data                                        | 3             |
| Physical examination                                              | 1             |
| Patient interviews                                                | 2             |

Chart 1 outlines the disease areas covered. **(Chart 1 inserted here)**

Table 4 presents the frequency of positive associations and 'no associations' categorized by type of outcomes (for 378 of the 556 cases where sufficient information was available to categorise). These include; objectively measured health outcomes (for example, 'mortality', 'blood glucose levels',



'infections', 'medical errors'); self-reported health and wellbeing outcomes (for example, 'health status', 'functional ability' 'quality of life', 'anxiety' ); adherence to recommended treatment and use of preventive care services likely to improve health outcomes (for example, 'medication compliance', 'adherence to treatment' and screening for a variety of conditions); outcomes related to healthcare resource use (for example 'hospitalizations', 'hospital readmission', 'emergency department use', 'primary care visits'); errors or adverse events and measures of the technical quality of care.

**Table 4: Associations categorised by type of outcome**

|                                    | Objective' health outcomes | Self-reported health and wellbeing | Adherence to treatment (including medication) | Preventive care | Healthcare resource use | Adverse events | Technical quality of care | All categories |
|------------------------------------|----------------------------|------------------------------------|-----------------------------------------------|-----------------|-------------------------|----------------|---------------------------|----------------|
| No. of positive associations found | 29                         | 61                                 | 152                                           | 24              | 31                      | 7              | 8                         | 312            |
| 'No associations'                  | 11                         | 36                                 | 7                                             | 2               | 6                       | 0              | 4                         | 66             |

Table 5 shows associations categorised by type of care provider (for the subset of studies focusing on one setting) and for studies focused on chronic conditions.

**Table 5: Weight of evidence by provider and for chronic conditions**

| Weight of evidence by provider and for chronic conditions | Associations found | No associations |
|-----------------------------------------------------------|--------------------|-----------------|
| Primary care                                              | 110                | 48              |
| Hospital                                                  | 43                 | 17              |
| Chronic conditions                                        | 53                 | 9               |

Tables 6 and 7 present details of all studies identified, specifying the analytical focus of each study, methods to measure variables and positive associations and 'no associations' found.

## Discussion

Overall, the evidence indicates associations between patient experience, clinical effectiveness and patient safety that appear consistent across a range of disease areas, study designs and settings.

As Table 4 indicates, the evidence shows positive associations found outweigh those not found for both self-assessment of physical and mental health (61 vs 36) and 'objective' measures of health outcomes (e.g. where measures are taken by a clinician or by reviewing medical records) (29 vs 11). For objective measures, one study<sup>25</sup> shows positive associations for ulcer disease, hypertension and breast cancer. Two studies on myocardial infarction show positive associations with survival one year after discharge<sup>26</sup> and inpatient mortality.<sup>27</sup> Objective measurement is less frequently explored than self-rated health and is an area that could benefit from further research.

1  
2  
3 Evidence is strong in the case of adherence to recommended medical treatment. A meta-analysis  
4 included in this study showed positive associations between the quality of clinician-patient  
5 communications and adherence to medical treatment in 125 out of 127 studies analysed and  
6 showed the odds of patient adherence was 1.62 times higher where physicians had communication  
7 training.<sup>28</sup> Regarding compliance with medication, positive associations found outweigh those not  
8 found.<sup>20 29-35</sup> A review of interventions to increase adherence to medication (not included in this  
9 study) showed communication of information, good provider-patient relationships and patients'  
10 agreement with the need for treatment as common determinants of effectiveness.<sup>36</sup> There is  
11 evidence of better use of preventive services, such as screening services in diabetes, colorectal,  
12 breast and cervical cancer; cholesterol testing and immunization.<sup>24 25 37-39</sup> There is also evidence of  
13 impacts on resource use of primary and secondary care (such as hospitalizations, readmissions and  
14 primary care visits).<sup>21 29 40-45</sup>

15  
16  
17 For studies exploring associations between patient experience and technical quality of care  
18 measured by other means, the evidence is mixed. Two studies in acute care showed positive  
19 associations between overall ratings of patient experience and ratings of the technical quality of care  
20 (using Hospital Quality Alliance (HQA) measures)<sup>23 46</sup> for myocardial infarction, congestive heart failure,  
21 pneumonia and complications from surgery.<sup>23 46</sup> Another found an association with adherence to  
22 clinical guidelines for acute myocardial infarction.<sup>27</sup> A similar study in primary care found positive  
23 associations between patient experience of processes and measurement of care quality (from the  
24 HEDIS system measuring care quality for disease prevention and management in chronic conditions).  
25  
26  
27  
28  
29  
30  
31  
32  
33  
34  
35  
36  
37  
38  
39  
40  
41  
42  
43  
44  
45  
46  
47  
48  
49  
50  
51  
52  
53  
54  
55  
56  
57  
58  
59  
60  
24 However, two other studies found no associations between patients' ratings and ratings based  
on an assessment of medical records.<sup>47 48</sup>

Some studies show positive associations between patients' perspective or observations of processes  
of care and the safety of care recorded through other means. Isaac<sup>46</sup> found positive associations  
between ratings of patient experience and six patient safety indicators (decubitus ulcer; failure to  
rescue; infections due to medical care; postoperative hemorrhage, respiratory failure, pulmonary  
embolism and sepsis). Two studies examining evidence for patients' ability to identify medical errors  
or adverse events in hospital showed positive associations between patients' accounts of their  
experience of adverse events and the documentation of events in medical records.<sup>49 50</sup> But another  
study shows only 2% of patient-reported errors were classified by medical reviewers as 'real clinical  
medical errors' with most 'reclassified' by clinicians as 'misunderstandings' or 'behaviour or  
communication problems'.<sup>51</sup> Overall there is less evidence available on safety compared to  
effectiveness and this should be a priority for future research in this area.

Research from other studies not included in this review support these findings. For example,  
research on 'decision aids' to ensure patients are well informed about their treatments and that  
decisions reflect the preferences of patients indicates that patient engagement has a beneficial  
impact on outcomes. For example, awareness of the risks of surgical procedures resulted in a 23%  
reduction in surgical interventions and better functional status.<sup>52</sup> Another review showed that  
provision of good information and emotional support are associated with better recovery from  
surgery and heart attacks.<sup>53</sup>

### **Study strengths and limitations**

This review builds on other studies<sup>9 10 16 17</sup> exploring links between these three domains. This study  
also demonstrates an approach to designing a systematic search for evidence for the 'catch-all' term  
patient experience, bringing together evidence from a variety of sources that may otherwise remain  
dispersed. This approach can be used or adapted for further research in this area.

1  
2  
3 This was a time-limited review and there is scope to expand this search based on our results. There  
4 may be scope to broaden the search terms and this may uncover further evidence. The first search  
5 was confined to one database and the review focused primarily on peer-reviewed literature  
6 excluding gray literature. To manage the scope of this review we restricted the analysis of  
7 interventions to improve patient experience to evidence within systematic reviews. NEW TEXT  
8 While we used some quality criteria to filter studies (including the use of validated tools to measure  
9 experience, safety and effectiveness outcomes and sample size), with more time a more detailed  
10 formal quality assessment may have added value to the study. Although all positive associations  
11 included in the study are statistically significant, the strength of associations vary. Due to time  
12 constraints and the heterogeneity of measures used we did not systematically compare the  
13 strengths of positive associations in different studies but this may be an area for future work. NEW  
14 TEXT There may also be scope to explore whether future research in this area could go beyond the  
15 counting of associations in this study through, for example, meta-analysis. As always, there may be  
16 a publication bias in favour of studies showing positive associations between patient experience  
17 variables and safety and effectiveness outcomes.<sup>54</sup> In addition, 28 of the 40 individual studies  
18 assessed were conducted in the United States and caution is needed about their applicability to  
19 other healthcare systems.  
20  
21

## 22 23 24 **Conclusion**

25 The inclusion of patient experience as one of the pillars of quality is partly justified on the grounds  
26 that patient experience data, robustly collected and analyzed, may help highlight strengths and  
27 weaknesses in effectiveness and safety and that focusing on improving patient experience will  
28 increase the likelihood of improvements in the other two domains.<sup>3</sup>  
29

30 The evidence collated in this study demonstrates positive associations between patient experience  
31 and the other two domains of quality. Because associations do not entail causality, this does not  
32 necessarily prove that improvements in patient experience will cause improvements in the other  
33 two domains. However, the weight of evidence across different areas of healthcare indicates that  
34 patient experience is clinically important. There is also some evidence to suggest that patients can  
35 be used as partners in identifying poor and unsafe practice and help enhance effectiveness and  
36 safety. This supports the argument that the three dimensions of quality should be looked at as a  
37 group and not in isolation. Clinicians should resist sidelining patient experience measures as too  
38 subjective or mood-orientated, divorced from the 'real' clinical work of measuring and delivering  
39 patient safety and clinical effectiveness.  
40  
41  
42  
43  
44  
45  
46  
47  
48  
49  
50  
51  
52  
53  
54  
55  
56  
57  
58  
59  
60

Table 6: Individual studies

| Author                            | Type of study, sample size, country        | Setting                   | Disease focus                                                                                  | Unit of analysis (Patient (P) or org (O)) | Patient experience focus and method used -                                                                                                                                   | Safety & effectiveness measure -                                                                                                                     | Association demonstrated                                                                                                                                                                                             | Association NOT demonstrated                                                           | Assoc. Found vs NOT found |
|-----------------------------------|--------------------------------------------|---------------------------|------------------------------------------------------------------------------------------------|-------------------------------------------|------------------------------------------------------------------------------------------------------------------------------------------------------------------------------|------------------------------------------------------------------------------------------------------------------------------------------------------|----------------------------------------------------------------------------------------------------------------------------------------------------------------------------------------------------------------------|----------------------------------------------------------------------------------------|---------------------------|
| Chang et al. 2006 <sup>48</sup>   | Cohort study, 236 patients, US             | Managed care organisation | 22 clinical conditions                                                                         | P                                         | Providers communication (The Consumer Assessment of Healthcare Providers and Systems survey and 'Quality of care')                                                           | Technical quality and patient global ratings (Medical records and patient interviews)                                                                | None                                                                                                                                                                                                                 | Technical quality of care                                                              | 0/1                       |
| Sequist et al. 2008 <sup>24</sup> | Cross-sectional study, 492 settings, US    | Primary care              | Cervical, breast and colorectal cancer, chlamydia, cardiovascular conditions, asthma, diabetes | P                                         | Doctor-patient communication, clinical team interactions, organizational features of care (The Ambulatory Care Experiences Survey)                                           | Clinical quality focusing on disease prevention, disease management and outcomes of care (Healthcare Effectiveness Data and Information Set (HEDIS)) | Cervical cancer, breast cancer and colorectal cancer screening, Chlamydia screening, Cholesterol screening (cardiac), LDL cholesterol testing (diabetes), eye exams (diabetes), HbA1c testing, nephropathy screening | Cholesterol management, HbA1c control, LDL cholesterol control, blood pressure control | 9/4                       |
| Burgers et al. 2010 <sup>55</sup> | Survey, 8973 patients, Range               | Range of settings         | Chronic lung, mental health, hypertension, heart disease, diabetes, arthritis, cancer          | P                                         | Coordination of care and overall experience (Commonwealth Fund International Health Policy Survey)                                                                           | Morbidity score                                                                                                                                      | Morbidity score                                                                                                                                                                                                      | None                                                                                   | 1/0                       |
| Kaplan et al. 1989 <sup>25</sup>  | Randomised control trial, 252 patients, US | Range of settings         | Ulcer disease, hypertension, diabetes, breast cancer                                           | P                                         | Physician-patient communication (Assessment of audio tape and questionnaire)                                                                                                 | Physiologic measures taken at visit and patients' self-rated health status survey.                                                                   | Follow up blood glucose and blood pressure, functional health status, self reported health status.                                                                                                                   | None                                                                                   | 4/0                       |
| Jha et al. 2008 <sup>23</sup>     | Cross-sectional study, 2429 settings, US   | Hospital                  | Acute myocardial infarction, congestive heart failure, pneumonia complications from surgery    | O                                         | Patient communication with clinicians, experience of nursing services, discharge planning (Hospital Consumer Assessment of Healthcare Providers and Systems (HCAHPS) survey) | Technical quality of care using Hospital Quality Alliance (HQA) score                                                                                | Technical quality of care in AMI, CHF, pneumonia, surgical care                                                                                                                                                      | None                                                                                   | 4/0                       |

|                                       |                                                   |                                 |                                     |   |                                                                                                                                                                                                          |                                                                                                                                        |                                                                                                                                  |                                                             |     |
|---------------------------------------|---------------------------------------------------|---------------------------------|-------------------------------------|---|----------------------------------------------------------------------------------------------------------------------------------------------------------------------------------------------------------|----------------------------------------------------------------------------------------------------------------------------------------|----------------------------------------------------------------------------------------------------------------------------------|-------------------------------------------------------------|-----|
| Rao et al. 2006 <sup>47</sup>         | Cross sectional study, 3487 patients, UK          | Primary care                    | Hypertension, Influenza vaccination | P | Older patients' experience of technical quality of care (General Practice Assessment survey)                                                                                                             | Technical quality of care - (medical records)                                                                                          | None                                                                                                                             | Hypertension monitoring and control, influenza vaccination. | 0/3 |
| Meterko et al. 2010 <sup>26</sup>     | Cohort study, 1858 patients, US                   | Veteran Affairs Medical Centres | Acute myocardial infarction         | P | Patient-centred care, access, courtesy, information, coordination, patient preferences, emotional support, family involvement, physical comfort (VA Survey of Healthcare Experiences of Patients (SHEP)) | Survival 1-year post discharge                                                                                                         | Survival 1-year post discharge                                                                                                   | None                                                        | 1/0 |
| Vincent et al. 1994 <sup>56</sup>     | Cohort Survey 227 patients, UK                    | Range of settings               | Varied                              | P | Accountability, explanation, standards of care, compensation (Questionnaire)                                                                                                                             | Legal action                                                                                                                           | Legal action                                                                                                                     | None                                                        | 1/0 |
| Agoritsas et al. 2005 <sup>57</sup>   | Cohort patient survey, 1518 patients, Switzerland | Hospital                        | Varied                              | P | Global rating of care and respect and dignity questions (Picker survey)                                                                                                                                  | Patient reports of undesirable events (survey)                                                                                         | Neglect of important information by health care staff, pain control, needless repetition of a test, being handled with roughness | None                                                        | 4/0 |
| Flocke et al. 1998 <sup>37</sup>      | Cross-sectional study, 2889 patients, US          | Primary care                    | Varied                              | P | Interpersonal communication, physician's knowledge of patient, coordination (Components of Primary Care Instrument (CPCI))                                                                               | Use of preventive care services (screening, health habit counselling services, immunization services)                                  | Screening, health habit counselling, immunization                                                                                | None                                                        | 3/0 |
| Jackson, J. et al. 2001 <sup>58</sup> | Quantitative Cohort study 500 patients, US        | General medicine walk-in clinic | Varied                              | P | Patient satisfaction (RAND 9-item survey)                                                                                                                                                                | Functional status (Medical Outcomes Study Short-Form Health Survey [SF-6]), symptom resolution, (RAND 9-item survey), follow-up visits | Symptom resolution, repeat visits, functional status                                                                             | None                                                        | 3/0 |

|    |                                     |                                             |                   |                       |   |                                                                                                                                 |                                                                                                                                                                          |                                                                                                |                 |     |
|----|-------------------------------------|---------------------------------------------|-------------------|-----------------------|---|---------------------------------------------------------------------------------------------------------------------------------|--------------------------------------------------------------------------------------------------------------------------------------------------------------------------|------------------------------------------------------------------------------------------------|-----------------|-----|
| 1  |                                     |                                             |                   |                       |   |                                                                                                                                 |                                                                                                                                                                          |                                                                                                |                 |     |
| 2  |                                     |                                             |                   |                       |   |                                                                                                                                 |                                                                                                                                                                          |                                                                                                |                 |     |
| 3  |                                     |                                             |                   |                       |   |                                                                                                                                 |                                                                                                                                                                          |                                                                                                |                 |     |
| 4  |                                     |                                             |                   |                       |   |                                                                                                                                 |                                                                                                                                                                          |                                                                                                |                 |     |
| 5  | Clark et al. 2007 <sup>41</sup>     | Randomized control trial 731 patients, US   | Range of settings | Asthma                | P | Patient experience of physician communication (Patient interviews and Likert Scale)                                             | Emergency department visits, hospitalizations, office phone calls and visits, urgent office visits (Survey + Medical chart review of 6% of patients to verify responses) | Number of office visits, emergency visits, urgent office visits, phone calls, hospitalizations | None            | 5/0 |
| 6  |                                     |                                             |                   |                       |   |                                                                                                                                 |                                                                                                                                                                          |                                                                                                |                 |     |
| 7  |                                     |                                             |                   |                       |   |                                                                                                                                 |                                                                                                                                                                          |                                                                                                |                 |     |
| 8  |                                     |                                             |                   |                       |   |                                                                                                                                 |                                                                                                                                                                          |                                                                                                |                 |     |
| 9  |                                     |                                             |                   |                       |   |                                                                                                                                 |                                                                                                                                                                          |                                                                                                |                 |     |
| 10 |                                     |                                             |                   |                       |   |                                                                                                                                 |                                                                                                                                                                          |                                                                                                |                 |     |
| 11 | Raiz et al. 1999 <sup>20</sup>      | Quantitative Cohort Study, 357 patients, US | Primary care      | Renal transplant      | P | Patient faith in doctor (Multidimensional Health Locus of Control Scale (MHLC))                                                 | Medication compliance                                                                                                                                                    | Remembering medications, taking medications as prescribed                                      | None            | 2/0 |
| 12 |                                     |                                             |                   |                       |   |                                                                                                                                 |                                                                                                                                                                          |                                                                                                |                 |     |
| 13 |                                     |                                             |                   |                       |   |                                                                                                                                 |                                                                                                                                                                          |                                                                                                |                 |     |
| 14 |                                     |                                             |                   |                       |   |                                                                                                                                 |                                                                                                                                                                          |                                                                                                |                 |     |
| 15 | Kahn et al. 2007 <sup>32</sup>      | Cohort study, 881 patients, US              | Hospitals         | Breast cancer         | P | Level of physician support, participation in decision-making and information on side effects (Survey)                           | Medication adherence                                                                                                                                                     | Ongoing tamoxifen use                                                                          | None            | 1/0 |
| 16 |                                     |                                             |                   |                       |   |                                                                                                                                 |                                                                                                                                                                          |                                                                                                |                 |     |
| 17 |                                     |                                             |                   |                       |   |                                                                                                                                 |                                                                                                                                                                          |                                                                                                |                 |     |
| 18 |                                     |                                             |                   |                       |   |                                                                                                                                 |                                                                                                                                                                          |                                                                                                |                 |     |
| 19 |                                     |                                             |                   |                       |   |                                                                                                                                 |                                                                                                                                                                          |                                                                                                |                 |     |
| 20 | Plomondon et al. 2008 <sup>22</sup> | Cohort study, 1815 patients, US             | Hospital          | Myocardial infarction | P | Satisfaction with explanations from their doctor, overall satisfaction with treatment (Seattle Angina questionnaire)            | Presence of angina (Seattle Angina Questionnaire)                                                                                                                        | Presence of angina                                                                             | None            | 1/0 |
| 21 |                                     |                                             |                   |                       |   |                                                                                                                                 |                                                                                                                                                                          |                                                                                                |                 |     |
| 22 |                                     |                                             |                   |                       |   |                                                                                                                                 |                                                                                                                                                                          |                                                                                                |                 |     |
| 23 |                                     |                                             |                   |                       |   |                                                                                                                                 |                                                                                                                                                                          |                                                                                                |                 |     |
| 24 | Fuertes et al. 2008 <sup>19</sup>   | Survey, 152 patients, US                    | Hospital          | Neurology             | P | Physician-patient communication, Physician-Patient Working Alliance, Empathy, Multicultural Competence (Questionnaire)          | Adherence to medical treatment (Adherence Self-Efficacy Scale and Medical Outcome Study (MOS) Adherence Scale)                                                           | Adherence to treatment                                                                         | None            | 1/0 |
| 25 |                                     |                                             |                   |                       |   |                                                                                                                                 |                                                                                                                                                                          |                                                                                                |                 |     |
| 26 |                                     |                                             |                   |                       |   |                                                                                                                                 |                                                                                                                                                                          |                                                                                                |                 |     |
| 27 |                                     |                                             |                   |                       |   |                                                                                                                                 |                                                                                                                                                                          |                                                                                                |                 |     |
| 28 |                                     |                                             |                   |                       |   |                                                                                                                                 |                                                                                                                                                                          |                                                                                                |                 |     |
| 29 |                                     |                                             |                   |                       |   |                                                                                                                                 |                                                                                                                                                                          |                                                                                                |                 |     |
| 30 | Lewis et al. 2010 <sup>31</sup>     | Qualitative cohort study, 191 patients, US  | Primary care      | Pain                  | P | Doctor-Patient Communication (Survey)                                                                                           | Medication adherence (Prescription Drug Use Questionnaire (PDUQ))                                                                                                        | Use of Prescribed Opioid Medications                                                           | None            | 1/0 |
| 31 |                                     |                                             |                   |                       |   |                                                                                                                                 |                                                                                                                                                                          |                                                                                                |                 |     |
| 32 |                                     |                                             |                   |                       |   |                                                                                                                                 |                                                                                                                                                                          |                                                                                                |                 |     |
| 33 |                                     |                                             |                   |                       |   |                                                                                                                                 |                                                                                                                                                                          |                                                                                                |                 |     |
| 34 | Safran et al. 1998 <sup>59</sup>    | Cross-sectional study, 7204 patients, US    | Primary care      | Varied                | P | Accessibility, continuity, integration, clinical interaction, interpersonal aspects, trust (The Primary Care Assessment Survey) | Adherence to physician's advice, health status, health outcomes (Medical Outcomes Study (MOS), Behavioural Risk Factor Survey)                                           | Adherence, health status                                                                       | Health outcomes | 2/1 |
| 35 |                                     |                                             |                   |                       |   |                                                                                                                                 |                                                                                                                                                                          |                                                                                                |                 |     |
| 36 |                                     |                                             |                   |                       |   |                                                                                                                                 |                                                                                                                                                                          |                                                                                                |                 |     |
| 37 |                                     |                                             |                   |                       |   |                                                                                                                                 |                                                                                                                                                                          |                                                                                                |                 |     |
| 38 |                                     |                                             |                   |                       |   |                                                                                                                                 |                                                                                                                                                                          |                                                                                                |                 |     |
| 39 |                                     |                                             |                   |                       |   |                                                                                                                                 |                                                                                                                                                                          |                                                                                                |                 |     |
| 40 |                                     |                                             |                   |                       |   |                                                                                                                                 |                                                                                                                                                                          |                                                                                                |                 |     |
| 41 |                                     |                                             |                   |                       |   |                                                                                                                                 |                                                                                                                                                                          |                                                                                                |                 |     |
| 42 |                                     |                                             |                   |                       |   |                                                                                                                                 |                                                                                                                                                                          |                                                                                                |                 |     |
| 43 |                                     |                                             |                   |                       |   |                                                                                                                                 |                                                                                                                                                                          |                                                                                                |                 |     |
| 44 |                                     |                                             |                   |                       |   |                                                                                                                                 |                                                                                                                                                                          |                                                                                                |                 |     |
| 45 |                                     |                                             |                   |                       |   |                                                                                                                                 |                                                                                                                                                                          |                                                                                                |                 |     |
| 46 |                                     |                                             |                   |                       |   |                                                                                                                                 |                                                                                                                                                                          |                                                                                                |                 |     |
| 47 |                                     |                                             |                   |                       |   |                                                                                                                                 |                                                                                                                                                                          |                                                                                                |                 |     |
| 48 |                                     |                                             |                   |                       |   |                                                                                                                                 |                                                                                                                                                                          |                                                                                                |                 |     |
| 49 |                                     |                                             |                   |                       |   |                                                                                                                                 |                                                                                                                                                                          |                                                                                                |                 |     |

|                                    |                                              |              |                                                  |   |                                                                                                                  |                                                                                                                                                                                                                    |                                                                                                                                                                                             |                                                                                                                                                    |      |
|------------------------------------|----------------------------------------------|--------------|--------------------------------------------------|---|------------------------------------------------------------------------------------------------------------------|--------------------------------------------------------------------------------------------------------------------------------------------------------------------------------------------------------------------|---------------------------------------------------------------------------------------------------------------------------------------------------------------------------------------------|----------------------------------------------------------------------------------------------------------------------------------------------------|------|
| Alamo et al. 2002 <sup>60</sup>    | Randomized study, 81, Spain                  | Primary care | Chronic musculoskeletal pain (CMP), fibromyalgia | P | Patient centered-care ('Gatha-Res questionnaire' and follow-up phone call)                                       | Pain (Visual Analogue Scale (VAS) anxiety (Oldberg scale of anxiety and depression (GHQ))                                                                                                                          | Anxiety, number of tender points (pain)                                                                                                                                                     | Pain, pain intensity, pain as a problem, number of associated symptoms, depression, physical mobility, social isolation, emotional reaction, sleep | 2/10 |
| Fan et al. 2005 <sup>61</sup>      | Survey, 21689 patients, US                   | Primary care | Cardiac care, diabetes, COPD                     | P | Communication skills and humanistic qualities of primary care physician (Seattle Outpatient Satisfaction Survey) | Physical and emotional aspects, coping ability and symptom burden for angina, COPD and diabetes (Seattle Angina Questionnaire (SAQ), Obstructive Lung Disease Questionnaire (SOLDQ), Diabetes Questionnaire (SDQ)) | Patient ability to deal with all 3 diseases, education for diabetes patients, angina stability, physical limitation due to angina                                                           | Self-reported physical limitation for angina and COPD, symptom burden for diabetes, complications for diabetes                                     | 7/4  |
| O'Malley et al. 2004 <sup>38</sup> | Cross-sectional study, 961 patients, US      | Primary care | Varied                                           | P | Patient trust (Survey)                                                                                           | Use of preventive care services                                                                                                                                                                                    | Blood pressure measurement, height and weight measurement, cholesterol check, pap tests, breast cancer screening, colorectal cancer screening, discussion of diet, discussion on depression | None                                                                                                                                               | 8/0  |
| Little et al. 2001 <sup>62</sup>   | Survey, 865 patients, UK                     | Primary care | varied                                           | P | Patient centredness (Survey)                                                                                     | Enablement, symptom burden, resource use                                                                                                                                                                           | Enablement, symptom burden, referrals                                                                                                                                                       | Re-attendance, investigations                                                                                                                      | 3/2  |
| Levinson et al. 1997 <sup>63</sup> | Qualitative cohort study, 124 physicians, US | Primary care | Varied                                           | P | Physician-patient communication (Assessment of audiotape)                                                        | Malpractice                                                                                                                                                                                                        | Malpractice claims                                                                                                                                                                          | None                                                                                                                                               | 1/0  |

|    |                                                |                                                  |                   |                   |   |                                                                                                                                         |                                                                                                                                  |                                                                                                                                   |                                           |     |
|----|------------------------------------------------|--------------------------------------------------|-------------------|-------------------|---|-----------------------------------------------------------------------------------------------------------------------------------------|----------------------------------------------------------------------------------------------------------------------------------|-----------------------------------------------------------------------------------------------------------------------------------|-------------------------------------------|-----|
| 1  |                                                |                                                  |                   |                   |   |                                                                                                                                         |                                                                                                                                  |                                                                                                                                   |                                           |     |
| 2  |                                                |                                                  |                   |                   |   |                                                                                                                                         |                                                                                                                                  |                                                                                                                                   |                                           |     |
| 3  |                                                |                                                  |                   |                   |   |                                                                                                                                         |                                                                                                                                  |                                                                                                                                   |                                           |     |
| 4  |                                                |                                                  |                   |                   |   |                                                                                                                                         |                                                                                                                                  |                                                                                                                                   |                                           |     |
| 5  | Carcaine-Edinboro & Bradley 2008 <sup>39</sup> | Cross sectional study, 8488 patients, US         | Primary care      | Colorectal cancer | P | Patient-provider communication (Consumer Assessment of Healthcare Providers and Systems (CAHPS) survey)                                 | Colorectal Cancer screening, fecal occult blood testing, and colonoscopy (Medical Expenditure Panel Survey)                      | CRC screening, fecal occult blood testing, colonoscopy                                                                            | None                                      | 3/0 |
| 6  |                                                |                                                  |                   |                   |   |                                                                                                                                         |                                                                                                                                  |                                                                                                                                   |                                           |     |
| 7  |                                                |                                                  |                   |                   |   |                                                                                                                                         |                                                                                                                                  |                                                                                                                                   |                                           |     |
| 8  |                                                |                                                  |                   |                   |   |                                                                                                                                         |                                                                                                                                  |                                                                                                                                   |                                           |     |
| 9  |                                                |                                                  |                   |                   |   |                                                                                                                                         |                                                                                                                                  |                                                                                                                                   |                                           |     |
| 10 |                                                |                                                  |                   |                   |   |                                                                                                                                         |                                                                                                                                  |                                                                                                                                   |                                           |     |
| 11 | Schneider et al. 2004 <sup>33</sup>            | Cross-sectional analysis study, 554 patients, US | Primary care      | HIV               | P | Physician-patient relationship (Survey)                                                                                                 | Adherence (Survey)                                                                                                               | Adherence to antiretroviral therapy                                                                                               | None                                      | 1/0 |
| 12 |                                                |                                                  |                   |                   |   |                                                                                                                                         |                                                                                                                                  |                                                                                                                                   |                                           |     |
| 13 |                                                |                                                  |                   |                   |   |                                                                                                                                         |                                                                                                                                  |                                                                                                                                   |                                           |     |
| 14 |                                                |                                                  |                   |                   |   |                                                                                                                                         |                                                                                                                                  |                                                                                                                                   |                                           |     |
| 15 | Schoenthaler et al. 2008 <sup>34</sup>         | Cross-sectional study, 439 patients, US          | Primary care      | Hypertension      | P | Patients' perceptions of providers' communication (Survey)                                                                              | Medication adherence (Morisky self-report measure)                                                                               | Medication adherence                                                                                                              | None                                      | 1/0 |
| 16 |                                                |                                                  |                   |                   |   |                                                                                                                                         |                                                                                                                                  |                                                                                                                                   |                                           |     |
| 17 |                                                |                                                  |                   |                   |   |                                                                                                                                         |                                                                                                                                  |                                                                                                                                   |                                           |     |
| 18 |                                                |                                                  |                   |                   |   |                                                                                                                                         |                                                                                                                                  |                                                                                                                                   |                                           |     |
| 19 | Slatore et al. 2010 <sup>64</sup>              | Cross sectional study, 342 patients, US          | Range of settings | COPD              | P | Patient-clinician communication (Quality of communication questionnaire (QOC))                                                          | Self-reported breathing problem confidence, and general self-rated health (Survey)                                               | Confidence in dealing with breathing problems                                                                                     | Self-rated health                         | 1/1 |
| 20 |                                                |                                                  |                   |                   |   |                                                                                                                                         |                                                                                                                                  |                                                                                                                                   |                                           |     |
| 21 |                                                |                                                  |                   |                   |   |                                                                                                                                         |                                                                                                                                  |                                                                                                                                   |                                           |     |
| 22 |                                                |                                                  |                   |                   |   |                                                                                                                                         |                                                                                                                                  |                                                                                                                                   |                                           |     |
| 23 | Lee & Lin 2009 <sup>65</sup>                   | Cohort study, 480 patients, Taiwan               | Range of settings | Type 2 diabetes   | P | Trust in physicians (Survey)                                                                                                            | Self-efficacy, adherence, health outcomes (Multidimensional Diabetes Questionnaire and 12-Item Short-Form Health Survey (SF-12)) | Physical HRQoL, mental HRQoL, body mass index HbA1c, triglycerides, complications, self-efficacy, outcome expectations, adherence | None                                      | 9/0 |
| 24 |                                                |                                                  |                   |                   |   |                                                                                                                                         |                                                                                                                                  |                                                                                                                                   |                                           |     |
| 25 |                                                |                                                  |                   |                   |   |                                                                                                                                         |                                                                                                                                  |                                                                                                                                   |                                           |     |
| 26 |                                                |                                                  |                   |                   |   |                                                                                                                                         |                                                                                                                                  |                                                                                                                                   |                                           |     |
| 27 |                                                |                                                  |                   |                   |   |                                                                                                                                         |                                                                                                                                  |                                                                                                                                   |                                           |     |
| 28 |                                                |                                                  |                   |                   |   |                                                                                                                                         |                                                                                                                                  |                                                                                                                                   |                                           |     |
| 29 | Heisler et al. 2002 <sup>35</sup>              | Survey, 1314 patients, US                        | primary care      | Diabetes          | P | Physician communication, physician interaction styles, participatory decision making (Questionnaire)                                    | Disease management (Surveys and national databases)                                                                              | Overall self-management, diabetes diet, medication compliance, exercise, blood glucose monitoring, foot care.                     | Exercise                                  | 6/1 |
| 30 |                                                |                                                  |                   |                   |   |                                                                                                                                         |                                                                                                                                  |                                                                                                                                   |                                           |     |
| 31 |                                                |                                                  |                   |                   |   |                                                                                                                                         |                                                                                                                                  |                                                                                                                                   |                                           |     |
| 32 |                                                |                                                  |                   |                   |   |                                                                                                                                         |                                                                                                                                  |                                                                                                                                   |                                           |     |
| 33 | Lee & Lin 2010 <sup>66</sup>                   | Cohort study, 614 patients, Taiwan               | Range of settings | Type 2 diabetes   | P | Patients' perceptions of support, autonomy, trust, satisfaction (Health Care Climate Questionnaire and Autonomy Preference Index (API)) | Glycosylated hemoglobin (HbA1C) (medical records) Physical and mental health-related quality of life (HRQoL) (SF-12)             | Physical HRQoL, mental HRQoL                                                                                                      | Information preference interaction, HbA1C | 2/2 |
| 34 |                                                |                                                  |                   |                   |   |                                                                                                                                         |                                                                                                                                  |                                                                                                                                   |                                           |     |
| 35 |                                                |                                                  |                   |                   |   |                                                                                                                                         |                                                                                                                                  |                                                                                                                                   |                                           |     |
| 36 |                                                |                                                  |                   |                   |   |                                                                                                                                         |                                                                                                                                  |                                                                                                                                   |                                           |     |
| 37 |                                                |                                                  |                   |                   |   |                                                                                                                                         |                                                                                                                                  |                                                                                                                                   |                                           |     |
| 38 |                                                |                                                  |                   |                   |   |                                                                                                                                         |                                                                                                                                  |                                                                                                                                   |                                           |     |
| 39 |                                                |                                                  |                   |                   |   |                                                                                                                                         |                                                                                                                                  |                                                                                                                                   |                                           |     |
| 40 |                                                |                                                  |                   |                   |   |                                                                                                                                         |                                                                                                                                  |                                                                                                                                   |                                           |     |
| 41 |                                                |                                                  |                   |                   |   |                                                                                                                                         |                                                                                                                                  |                                                                                                                                   |                                           |     |
| 42 |                                                |                                                  |                   |                   |   |                                                                                                                                         |                                                                                                                                  |                                                                                                                                   |                                           |     |
| 43 |                                                |                                                  |                   |                   |   |                                                                                                                                         |                                                                                                                                  |                                                                                                                                   |                                           |     |
| 44 |                                                |                                                  |                   |                   |   |                                                                                                                                         |                                                                                                                                  |                                                                                                                                   |                                           |     |
| 45 |                                                |                                                  |                   |                   |   |                                                                                                                                         |                                                                                                                                  |                                                                                                                                   |                                           |     |
| 46 |                                                |                                                  |                   |                   |   |                                                                                                                                         |                                                                                                                                  |                                                                                                                                   |                                           |     |
| 47 |                                                |                                                  |                   |                   |   |                                                                                                                                         |                                                                                                                                  |                                                                                                                                   |                                           |     |
| 48 |                                                |                                                  |                   |                   |   |                                                                                                                                         |                                                                                                                                  |                                                                                                                                   |                                           |     |
| 49 |                                                |                                                  |                   |                   |   |                                                                                                                                         |                                                                                                                                  |                                                                                                                                   |                                           |     |



|                                      |                                                  |                                     |                            |   |                                                                                                       |                                                                                                                                                    |                                                                                                                     |                                                                                                                                                                                                                                                                                   |      |
|--------------------------------------|--------------------------------------------------|-------------------------------------|----------------------------|---|-------------------------------------------------------------------------------------------------------|----------------------------------------------------------------------------------------------------------------------------------------------------|---------------------------------------------------------------------------------------------------------------------|-----------------------------------------------------------------------------------------------------------------------------------------------------------------------------------------------------------------------------------------------------------------------------------|------|
| Kennedy A. et al. 2003 <sup>67</sup> | Randomised control trial, 700 patients, UK       | Hospital                            | Inflammatory bowel Disease | P | Patient centered-care (Interviews)                                                                    | Resource use, self-rated physical and mental health, enablement (Patient diaries, questionnaires, medical records)                                 | Ability to cope with condition, symptom relapses, hospital visits, appointments made                                | Physical functioning, role limitations, social functioning, mental health, energy/vitality, pain, general health perception, anxiety, number of relapses, number of medically-defined relapses, average relapse duration, frequency of GP visits, delay before starting treatment | 4/13 |
| Stewart et al. 2000 <sup>42</sup>    | Observational Cohort study, 315 patients, Canada | Primary care                        | General                    | P | Patient-centred communication (Assessment of audiotape and Patient-Centered Communication Score tool) | Discomfort (VAS) symptom severity (Visual Analogue Scale), Health Status (Short Form-36 SF-36) Quality of care provision (Chart review by doctors) | Symptom discomfort & concern, self-reported health, diagnostic tests, referrals, and visits to the family physician | None                                                                                                                                                                                                                                                                              | 5/2  |
| Kinnersley et al. 1999 <sup>68</sup> | Observational Study, 143 patients, UK            | Primary care                        | Varied                     | P | Patient-centredness (Assessment of audiotape and questionnaires)                                      | Symptom resolution, resolution of concerns, functional health status (Questionnaire)                                                               | None                                                                                                                | Resolution of symptoms, resolution of concerns, functional health status                                                                                                                                                                                                          | 0/3  |
| Solberg et al. 2008 <sup>51</sup>    | Survey, 3109 patients, US                        | Primary care - multispecialty group | Varied                     | P | Patient experience of errors (Survey)                                                                 | Review of errors (Chart audits and physician reviewer judgements)                                                                                  | None                                                                                                                | None                                                                                                                                                                                                                                                                              | 1/0  |

|                                    |                                          |          |                                                                                              |   |                                                                                                                                                 |                                                                                                                                                              |                                                                                                                                                                                           |                                    |      |
|------------------------------------|------------------------------------------|----------|----------------------------------------------------------------------------------------------|---|-------------------------------------------------------------------------------------------------------------------------------------------------|--------------------------------------------------------------------------------------------------------------------------------------------------------------|-------------------------------------------------------------------------------------------------------------------------------------------------------------------------------------------|------------------------------------|------|
| Isaac et al. 2010 <sup>46</sup>    | Cross-sectional study, 927 hospitals, US | Hospital | Acute myocardial infarction, congestive heart failure, pneumonia complications from surgery. | O | General patient experiences (Hospital Consumer Assessment of Healthcare Providers and Systems survey (HCAHPS))                                  | Processes of care (Health Quality Alliance (HQA) database) and Patient Safety Indicators                                                                     | Decubitus ulcer rates, infections, processes of care for pneumonia, CHF and myocardial infarctions, surgical composites, hemorrhage, respiratory failure, DVT, pulmonary embolism, sepsis | Failure to rescue                  | 11/1 |
| Glickman et al. 2010 <sup>27</sup> | Cohort Study, 3562 patients, US          | Hospital | Acute myocardial infarction                                                                  | P | Patient satisfaction (Press-Ganey survey)                                                                                                       | Adherence to practice guidelines, outcomes (CRUSADE quality improvement registry).                                                                           | Inpatient mortality, composite clinical measures, AMI survival                                                                                                                            | None                               | 3/0  |
| Fremont et al. 2001 <sup>69</sup>  | Survey, 1346 patients, US                | Hospital | Cardiac                                                                                      | P | Patient centred care (Picker survey)                                                                                                            | Processes of care, functional health status, cardiac symptoms (Medical Outcomes Study questionnaire, London School of Hygiene measures for cardiac symptoms) | Overall health, chest pain, patient reported general physical and mental health status                                                                                                    | Mental health, shortness of breath | 5/2  |
| Riley et al. 2007 <sup>70</sup>    | Survey, 506 patients, Canada             | Hospital | Cardiac care - acute coronary                                                                | P | Continuity of care (The Heart Continuity of Care Questionnaire, Medical Outcome Study Social Support Survey, Illness Perception Questionnaire ) | Participation in cardiac rehabilitation, perception of illness, functional capacity (Duke Activity Status Index (DASI))                                      | Cardiac rehabilitation participation, perceptions of illness consequences                                                                                                                 | None                               | 2/0  |
| Weingart et al. 2005 <sup>49</sup> | Cohort study, 228 patients, US           | Hospital | Varied                                                                                       | P | Patient experience of adverse events (Interviews)                                                                                               | Adverse events (Medical records and patient interviews)                                                                                                      | Adverse events                                                                                                                                                                            | None                               | 1/0  |
| Weissman et al. 2008 <sup>50</sup> | Survey, 998 patients, US                 | Hospital | Varied                                                                                       | P | Patient experience of adverse events (Interviews)                                                                                               | Adverse events (Medical records)                                                                                                                             | Adverse events                                                                                                                                                                            | None                               | 1/0  |

Table 7: Systematic reviews

1  
2  
3  
4  
5  
6  
7  
8  
9  
10  
11  
12  
13  
14  
15  
16  
17  
18  
19  
20  
21  
22  
23  
24  
25  
26  
27  
28  
29  
30  
31  
32  
33  
34  
35  
36  
37  
38  
39  
40  
41  
42  
43  
44  
45  
46  
47  
48  
49

| Authors                             | Timespan & studies meeting inclusion criteria | Health care setting | Disease areas covered                                                                                   | Unit of analysis | Patient experience focus (and measurement methods)                                        | Safety & effectiveness measure - association demonstrated -                                                                                                                                                                                                                                                                      | Safety & effectiveness measure - association NOT demonstrated                                                                                                              | Assoc found vs not found |
|-------------------------------------|-----------------------------------------------|---------------------|---------------------------------------------------------------------------------------------------------|------------------|-------------------------------------------------------------------------------------------|----------------------------------------------------------------------------------------------------------------------------------------------------------------------------------------------------------------------------------------------------------------------------------------------------------------------------------|----------------------------------------------------------------------------------------------------------------------------------------------------------------------------|--------------------------|
| Blasi et al. 2001 <sup>71</sup>     | 1974-1998, 4 out of 25                        | Range of settings   | Asthma, hypertension, cancer, insomnia, menopause, obesity, tonsillitis                                 | P                | Provider behaviour and communication (Grading of consultations)                           | Health status, symptom improvement, treatment effectiveness, fear of injection, anxiety, ratings of pain, number of doctor visits, pain, speed of recovery                                                                                                                                                                       | Comfort, recovery time, return visits                                                                                                                                      | 9/3                      |
| Drotar 2009 <sup>29</sup>           | 1998-2008, 4 out of 22                        | Range of settings   | Asthma, cystic fibrosis, diabetes, epilepsy, inflammatory bowel disease, juvenile rheumatoid arthritis  | P                | Physician and staff behaviour (Surveys, interviews, medical records)                      | Treatment adherence, compliance, office visits, phone calls, hospitalizations                                                                                                                                                                                                                                                    | Medication adherence                                                                                                                                                       | 5/1                      |
| Hall et al. 2010 <sup>72</sup>      | 1990-2009, 10 out of 14                       | Range of settings   | Brain injury, musculoskeletal conditions, cardiac conditions, trauma, back, neck and shoulder pain      | P                | Therapist-patient relationship, therapeutic alliance (Surveys, audio/video taped session) | Adherence, employment status, physical training, therapeutic success, perceived effect of treatment, pain, physical function, depression, general health status, attendance, floor-bench lifts, global assessment scores, ability to perform ADLs, mobility                                                                      | Weekly physical training, disability, productivity, depression, functional status, adherence                                                                               | 18/6                     |
| Stevenson et al. 2004 <sup>73</sup> | 1991-2000, 7 out of 134                       | Range of settings   | Hypertension, asthma, chronic obstructive pulmonary disorder, ovarian cancer, epilepsy, hyperlipidaemia | P                | Doctor-patient communication (Surveys)                                                    | Self-reported adherence, blood pressure control, GP practice visits, hospitalizations, emergency room visits for children with asthma, quality of life for COPD patients, oral contraceptive adherence, adherence to anti-epileptic drugs, pain control following gynaecological surgery, adherence to medication for depression | Length of visits to doctor for asthma patients, health status and use of health care services for epilepsy patients, adherence to Niacin and bile acid sequestrant therapy | 9/5                      |

1  
2  
3  
4  
5  
6  
7  
8  
9  
10  
11  
12  
13  
14  
15  
16  
17  
18  
19  
20  
21  
22  
23  
24  
25  
26  
27  
28  
29  
30  
31  
32  
33  
34  
35  
36  
37  
38  
39  
40  
41  
42  
43  
44  
45  
46  
47  
48  
49

|                                         |                          |                   |                            |   |                                                                                                                                       |                                                                                                                                                                                                                                                                                                                                                                                                                                                                                                                                                                     |                                                                                                                                                                                                                                                                                                                                                                                                                  |       |
|-----------------------------------------|--------------------------|-------------------|----------------------------|---|---------------------------------------------------------------------------------------------------------------------------------------|---------------------------------------------------------------------------------------------------------------------------------------------------------------------------------------------------------------------------------------------------------------------------------------------------------------------------------------------------------------------------------------------------------------------------------------------------------------------------------------------------------------------------------------------------------------------|------------------------------------------------------------------------------------------------------------------------------------------------------------------------------------------------------------------------------------------------------------------------------------------------------------------------------------------------------------------------------------------------------------------|-------|
| Saultz & Lochner 2005 <sup>44</sup>     | 1967-2002, 41 studies    | Range of settings | Varied                     | P | Continuity of care -ongoing relationship between individual doctor &patient (Surveys, continuity of care index)                       | Hospitalization rate, hospital readmission, length of stay, influenza immunization, preventive care, antibiotic compliance, ICU days, Neonatal morbidity, Apgar score, Birth weight, Rates and timeliness of childhood immunizations, health-related quality of life, recommended diabetes care measures, glucose control, PAP tests, mammogram rate, breast exams, surgical operation rates, hypertension control, presence of depression, relationship problems, adverse events in hospitalized patients, degree of patient enablement, rheumatic fever incidence | Diabetes (HbA1C, lipid control, blood pressure control, presence of diabetic complications), blood glucose control, functional ability of elderly patients, compliance with antibiotic therapy, well-child visits, blood pressure checks in women, pregnancy complications, newborn mortality, immunization rates, NICU admissions, Apgar scores, caesarean rate, length of labor, indications for tonsillectomy | 51/30 |
| Hall & Roter & Katz 1988 <sup>74</sup>  | Meta-analysis 41 studies | Range of settings | Varied                     | P | Clinician-patient communication (Surveys, interviews, observations, assessment of video or audio)                                     | Compliance (with 4 variables of PE), recall/understanding (with 4 variables of PE)                                                                                                                                                                                                                                                                                                                                                                                                                                                                                  | Compliance (with 1 variable of PE), recall/understanding (with 1 variable of PE)                                                                                                                                                                                                                                                                                                                                 | 8/2   |
| Jackson, C. et al. 2010 <sup>40</sup>   | 1984-2008, 3 out of 17   | Range of settings | Inflammatory bowel disease | P | Trust in physician, Patient-physician agreement, adequacy information (Surveys)                                                       | Adherence to treatment                                                                                                                                                                                                                                                                                                                                                                                                                                                                                                                                              | Compliance                                                                                                                                                                                                                                                                                                                                                                                                       | 2/1   |
| Sans-Coralles et al. 2006 <sup>43</sup> | 1984-2005, 9 out of 20   | Primary care      | No specific disease focus  | P | Continuity of care, coordination of care, consultation time, doctor-patient relationship (Validated tools in these different domains) | Hospital admissions, length of stay, compliance, recovery from discomfort, emotional health, diagnostic tests, referrals, quality of care for asthma, diabetes and angina, symptom burden, receipt of preventive services                                                                                                                                                                                                                                                                                                                                           | Enablement                                                                                                                                                                                                                                                                                                                                                                                                       | 13/1  |
| Hsiao & Boulton 2008 <sup>45</sup>      | 1984-2003, 3 out of 14   | Primary care      | No specific disease focus  | P | Continuity with physician (Surveys, interviews, medical records, chart reviews)                                                       | Hospitalisations for all conditions and ambulatory care-sensitive conditions, odds of hospitalisation(2), health care costs(2), emergency department visits, emergent hospital admissions(2), length of stay, diabetes recognition, mental health(2), pain, perception of health, well-being, BMI, triglyceride concentrations, recovery, clinical outcomes, self-reported health                                                                                                                                                                                   | Acute ambulatory care-sensitive conditions, mobility, pain, emotion, activities of daily living, smoking, BMI, hypertension, hypercholesterolemia, self-reported health, glycemic control, diabetes control, frequency of hypoglycemic reactions, blood sugar, weight                                                                                                                                            | 21/15 |

1  
2  
3  
4  
5  
6  
7  
8  
9  
10  
11  
12  
13  
14  
15  
16  
17  
18  
19  
20  
21  
22  
23  
24  
25  
26  
27  
28  
29  
30  
31  
32  
33  
34  
35  
36  
37  
38  
39  
40  
41  
42  
43  
44  
45  
46  
47  
48  
49

|                                         |                                                   |                   |                                                                                                                                                                              |   |                                                                                        |                                                                                                                                                                                                                                                                                                                                                                                                                                                                                                                      |                                     |       |
|-----------------------------------------|---------------------------------------------------|-------------------|------------------------------------------------------------------------------------------------------------------------------------------------------------------------------|---|----------------------------------------------------------------------------------------|----------------------------------------------------------------------------------------------------------------------------------------------------------------------------------------------------------------------------------------------------------------------------------------------------------------------------------------------------------------------------------------------------------------------------------------------------------------------------------------------------------------------|-------------------------------------|-------|
| Arbuthnott et al. 2009 <sup>30</sup>    | Meta analysis, 1955-2007, All 48 studies included | Range of settings | Asthma, bacterial infection, fibromyalgia, diabetes, renal disease, hypertension, congestive heart failure, inflammatory bowel disease, breast cancer, HIV, and tuberculosis | P | Physician-patient collaboration (Observation, surveys)                                 | Medication adherence, behavioural adherence                                                                                                                                                                                                                                                                                                                                                                                                                                                                          | Appointment adherence               | 2/1   |
| Stewart 1995 <sup>75</sup>              | 1983-1993, 21 studies                             | Range of settings | Peptic ulcers, breast cancer, diabetes, hypertension, headache, coronary artery disease, gingivitis, tuberculosis, prostate cancer                                           | P | Physician-patient communication (Surveys, evaluation of audio- or videotape recording) | Peptic ulcer physical limitation, blood glucose levels, blood pressure, headache resolution, physician evaluation of symptom resolution for coronary artery disease, gingivitis and tuberculosis, anxiety level in gynecological care, radiation therapy, breast cancer care, functional status following radiation therapy for prostate cancer, anxiety after radiation therapy, pain levels and hospital length of stay after intra-abdominal surgery, physical and psychological complaints in breast cancer care | Details not included                | 16/5  |
| Zolnierok & DiMatteo 2009 <sup>28</sup> | Meta analysis 1949-2008, 127 studies              | Range of settings | No specific disease focus                                                                                                                                                    | P | Physician-patient communication (Observation, surveys)                                 | Adherence to treatment recommended by clinician                                                                                                                                                                                                                                                                                                                                                                                                                                                                      | Adherence (2 observational studies) | 125/2 |
| Beck et al. 2002 <sup>76</sup>          | 1975-2000, 5 out of 14                            | Primary care      | No specific disease focus                                                                                                                                                    | P | Physician-patient communication (Observation, evaluation of audio and video tapes)     | Compliance with doctors' advice, blood pressure, pill count                                                                                                                                                                                                                                                                                                                                                                                                                                                          | None                                | 10/0  |
| Cabana & Lee 2004 <sup>21</sup>         | 1966-2002, 7 out of 18                            | Range of settings | Rheumatoid arthritis, epilepsy, breast cancer, cervical cancer, diabetes                                                                                                     | P | Continuity of care (Validated measures of continuity e.g. SCOC)                        | Hospitalizations, length of stay, emergency department visits, intensive care days, preventive medicine visits, drug or alcohol abuse, outpatient attendance, glucose control for adults with diabetes                                                                                                                                                                                                                                                                                                               | None                                | 18/5  |
| Richards et al. 2006 <sup>77</sup>      | 1997-2002, 2 out of 33                            | Range of settings | Psoriasis                                                                                                                                                                    | P | Patient's perception of care, satisfaction, interpersonal skills (Surveys, interviews) | Treatment adherence, medication use                                                                                                                                                                                                                                                                                                                                                                                                                                                                                  | None                                | 2/0   |

## References

1. Institute of Medicine. *Crossing the Quality Chasm: a new health system for the 21st century*. Washington DC: National Academy Press, 2001.
2. Black N., Jenkinson C. Measuring patients experiences and outcomes. *BMJ* 2009;339.
3. Department of Health. *Liberating the NHS: Transparency in outcomes – a framework for the NHS*: Department of Health, 2010.
4. Darzi A. *High Quality Care For All – NHS Next Stage Review Final Report*: Department of Health 2008.
5. Department of Health. *Using the Commissioning for Quality and Innovation (CQUIN) payment framework*, 2008.
6. Berwick DM. What "Patient-Centered" Should Mean: Confessions Of An Extremist. *Health Affairs* 2009;28(4):w555-w65.
7. Street RL, Makoul G, Arora NK, et al. How does communication heal? Pathways linking clinician-patient communication to health outcomes. *Patient education and counseling* 2009;74(3):295-301.
8. Thom DH, Hall MA, Pawlson LG. Measuring Patients' Trust In Physicians When Assessing Quality Of Care. *Health Affairs* 2004;23(4):124-32.
9. Vincent CA, Coulter A. Patient safety: what about the patient? *Quality and Safety in Health Care* 2002;11(1):76-80.
10. Coulter A. *Engaging patients in healthcare*. Maidenhead Open University Press 2011.
11. Rathert C, Huddleston N, Pak Y. Acute care patients discuss the patient role in patient safety. *Health Care Management Review*;36(2):134-44  
10.1097/HMR.0b013e318208cd31.
12. Picker Institute. *Patient experience surveys: the rationale* Picker Institute Europe, 2008.
13. NICE. *Patient experience in adult NHS services: improving the experience of care for people using adult NHS services*: NICE, 2011.
14. Iles V., Vaughan Smith J. Working in health care could be one of the most satisfying jobs in the world - why doesn't it feel like that? , 2009.
15. López L., Weissman JS., Schneider EC., et al. Disclosure of hospital adverse events and its association with patients' ratings of the quality of care. *Arch Intern Med* 2009;169(20).
16. Safran DG., Taira DA., Rogers WH., et al. Linking primary care performance to outcomes of care. *Journal of Family Practice* 1998;47:213-20.
17. Robert Wood Johnson Foundation. *Good for Health, Good for Business: The Case for Measuring Patient Experience of Care: The Center for Health Care Quality at the George Washington University Medical Center*
18. Greenhalgh T., Peacock R. Effectiveness and efficiency of search methods in systematic reviews of complex evidence: audit of primary sources. *BMJ* 2005;331(7524):1064-65.
19. Fuertes J, Boylan L, Fontanella J. Behavioral Indices in Medical Care Outcome: The Working Alliance, Adherence, and Related Factors. *Journal of General Internal Medicine* 2009;24(1):80-85.
20. Raiz LR, Kilty KM, Henry ML, et al. Medication Compliance Following Renal Transplantation. *Transplantation* 1999;68(1):51-55.
21. Cabana M., Jee S. Does continuity of care improve patient outcomes? *The Journal of Family Practice* 2004;53(12).
22. Plomondon M, Magid D, Masoudi F, et al. Association Between Angina and Treatment Satisfaction after Myocardial Infarction. *Journal of General Internal Medicine* 2008;23(1):1-6.

23. Jha AK, Orav EJ, Zheng J, et al. *New England Journal of Medicine* 2008;359(18):1921-31.
24. Sequist et al. Quality Monitoring of Physicians: Linking Patients' Experiences of Care to Clinical Quality and Outcomes. *Journal of General Internal Medicine* 2008;23(11).
25. Kaplan SH, Greenfield S, Ware JE. Assessing the effects of physician-patient interactions on the outcomes of chronic disease. *Medical Care* 1989;27(3, Suppl):S110-S27.
26. Meterko M, Wright S, Lin H, et al. Mortality among Patients with Acute Myocardial Infarction: The Influences of Patient-Centered Care and Evidence-Based Medicine. *Health Services Research* 2010;45(5p1):1188-204.
27. Glickman SW, Boulding W, Manary M, et al. Patient Satisfaction and Its Relationship With Clinical Quality and Inpatient Mortality in Acute Myocardial Infarction. *Circulation: Cardiovascular Quality and Outcomes*;3(2):188-95.
28. Zolnierok H. KB, DiMatteo MR. Physician Communication and Patient Adherence to Treatment: A Meta-Analysis. *Medical Care* 2009;47(8):826-34  
10.1097/MLR.0b013e31819a5acc.
29. Drotar D. Physician Behavior in the Care of Pediatric Chronic Illness: Association With Health Outcomes and Treatment Adherence. *Journal of Developmental & Behavioral Pediatrics* 2009;30(3):246-54  
10.1097/DBP.0b013e3181a7ed42.
30. Arbuthnott A, Sharpe D. The effect of physician-patient collaboration on patient adherence in non-psychiatric medicine. *Patient education and counseling* 2009;77(1):60-67.
31. Lewis ET, Combs A, Trafton JA. Reasons for Under-Use of Prescribed Opioid Medications by Patients in Pain. *Pain Medicine* 2010;11(6):861-71.
32. Kahn KL, Schneider EC, Malin JL, et al. Patient Centered Experiences in Breast Cancer: Predicting Long-Term Adherence to Tamoxifen Use. *Medical Care* 2007;45(5):431-39  
10.1097/01.mlr.0000257193.10760.7f.
33. Schneider EC, Zaslavsky AM, Landon BE, et al. National Quality Monitoring of Medicare Health Plans: The Relationship Between Enrollees' Reports and the Quality of Clinical Care. *Medical Care* 2001;39(12):1313-25.
34. Schoenthaler A, Chaplin WF, Allegrante JP, et al. Provider communication effects medication adherence in hypertensive African Americans. *Patient Education and Counseling* 2009;75(2):185-91.
35. Heisler M, Bouknight RR, Hayward RA, et al. The Relative Importance of Physician Communication, Participatory Decision Making, and Patient Understanding in Diabetes Self-management. *Journal of General Internal Medicine* 2002;17(4):243-52.
36. Haynes RB, Ackloo E, Sahota N, et al. Interventions for enhancing medication adherence. *Cochrane Database Syst Rev* 2008.
37. Flocke SA, Stange KC, Zyzanski SJ. The Association of Attributes of Primary Care With the Delivery of Clinical Preventive Services. *Medical Care* 1998;36(8):AS21-AS30.
38. O'Malley AS, Sheppard VB, Schwartz M, et al. The role of trust in use of preventive services among low-income African-American women. *Preventive Medicine: An International Journal Devoted to Practice and Theory* 2004;38(6):777-85.
39. Carcaise-Edinboro P, Bradley CJ. Influence of Patient-Provider Communication on Colorectal Cancer Screening. *Medical Care* 2008;46(7):738-45  
10.1097/MLR.0b013e318178935a.
40. Jackson CA, Clatworthy J, Robinson A, et al. Factors Associated With Non-Adherence to Oral Medication for Inflammatory Bowel Disease: A Systematic Review. *Am J Gastroenterol* 2010;105(3):525-39.



- 1
- 2
- 3 41. Clark NM, Cabana MD, Nan B, et al. The Clinician-Patient Partnership Paradigm:  
4 Outcomes Associated With Physician Communication Behavior. *Clinical Pediatrics*  
5 2008;47(1):49-57.
- 6 42. Stewart M., Brown J., Donner A., et al. The Impact of Patient-Centered Care on  
7 Outcomes. *Journal of Family Practice* 2000;49(9).
- 8 43. Sans-Corrales M, Pujol-Ribera E, GenÃ©-Badia J, et al. Family medicine attributes  
9 related to satisfaction, health and costs. *Family Practice* 2006;23(3):308-16.
- 10 44. Saultz JW, Lochner J. Interpersonal Continuity of Care and Care Outcomes: A Critical  
11 Review. *The Annals of Family Medicine* 2005;3(2):159-66.
- 12 45. Hsiao C-J, Boulton C. Effects of Quality on Outcomes in Primary Care: A Review of the  
13 Literature. *American Journal of Medical Quality* 2008;23(4):302-10.
- 14 46. Isaac T, Zaslavsky AM, Cleary PD, et al. The Relationship between Patients' Perception  
15 of Care and Measures of Hospital Quality and Safety. *Health Services Research*  
16 2010;45(4):1024-40.
- 17 47. Rao M, Clarke A., Sanderson C., et al. Patients' Own Assessments of Quality of Primary  
18 Care Compared with Objective Records Based Measures of Technical Quality of  
19 Care: Cross Sectional Study. *BMJ* 2006;333(7797).
- 20 48. Chang JT, Hays RD, Shekelle PG, et al. Patients' global ratings of their health care are not  
21 associated with the technical quality of their care.  
22 . *Ann Intern Med* 2006;145(8):635-6.
- 23 49. Weingart SN, Pagovich O, Sands DZ, et al. What Can Hospitalized Patients Tell Us  
24 About Adverse Events? Learning from Patient-Reported Incidents. *Journal of*  
25 *General Internal Medicine* 2005;20(9):830-36.
- 26 50. Weissman JS, Schneider EC, Weingart SN, et al. Comparing Patient-Reported Hospital  
27 Adverse Events with Medical Record Review: Do Patients Know Something That  
28 Hospitals Do Not? *Annals of Internal Medicine* 2008;149(2):100-08.
- 29 51. Solberg LI, Asche SE, Averbach BM, et al. Can Patient Safety Be Measured by Surveys  
30 of Patient Experiences? *Joint Commission Journal on Quality and Patient Safety*  
31 2008;34(5):266-74.
- 32 52. O'Connor AM, Bennett CL, Stacey D, et al. Decision aids for people facing health  
33 treatment or screening decisions. *Cochrane database of systematic reviews (Online)*  
34 2009(3):CD001431.
- 35 53. Mumford E, Schlesinger HJ, Glass GV. The effect of psychological intervention on  
36 recovery from surgery and heart attacks: an analysis of the literature. *American*  
37 *Journal of Public Health* 1982;72(2):141-51.
- 38 54. Begg C., Berlin J., N. J., . Publication Bias: A Problem in Interpreting Medical Data  
39 *Journal of the Royal Statistical Society. Series A (Statistics in Society)* 1988;151(3).
- 40 55. Burgers JS, Voerman GE, Grol R, et al. Quality and Coordination of Care for Patients  
41 With Multiple Conditions: Results From an International Survey of Patient  
42 Experience. *Evaluation & the Health Professions* 2010;33(3):343-64.
- 43 56. Vincent C. Understanding and Responding to Adverse Events. *New England Journal of*  
44 *Medicine* 2003;348(11):1051-56.
- 45 57. Agoritsas T, Bovier PA, Perneger TV. Patient Reports of Undesirable Events During  
46 Hospitalization. *Journal of General Internal Medicine* 2005;20(10):922-28.
- 47 58. Jackson JL, Chamberlin J, Kroenke K. Predictors of patient satisfaction. *Social Science &*  
48 *Medicine* 2001;52(4).
- 49 59. Safran DG., Miller W., Beckman H. Organizational Dimensions of Relationship-centred  
50 care. *Journal of General Internal Medicine* 2005;21:S9-15.
- 51
- 52
- 53
- 54
- 55
- 56
- 57
- 58
- 59
- 60



- 1  
2  
3 60. Alamo M Mo, Moral RR, Párrula de Torres LA. Evaluation of a patient-centred  
4 approach in generalized musculoskeletal chronic pain/fibromyalgia patients in  
5 primary care. *Patient education and counseling* 2002;48(1):23-31.
- 6 61. Fan VS, Reiber GE, Diehr P, et al. Functional Status and Patient Satisfaction. *Journal of*  
7 *General Internal Medicine* 2005;20(5):452-59.
- 8 62. Little P., Everitt H., Williamson I., et al. Observational study of effect of patient  
9 centredness and positive approach on outcomes of general practice consultations.  
10 *BMJ* 2001;323(7318):908-11.
- 11 63. Levinson W, Roter DL, Mullooly JP, et al. Physician-Patient Communication: The  
12 Relationship With Malpractice Claims Among Primary Care Physicians and  
13 Surgeons. *JAMA: The Journal of the American Medical Association* 1997;277(7):553-  
14 59.
- 15 64. Slatore, Christopher G, Cecere, et al. *Patient-Clinician Communication: Associations*  
16 *With Important Health Outcomes Among Veterans With COPD*. Northbrook, IL,  
17 ETATS-UNIS: American College of Chest Physicians, 2010.
- 18 65. Lee Y-Y, Lin JL. The effects of trust in physician on self-efficacy, adherence and  
19 diabetes outcomes. *Social Science & Medicine* 2009;68(6):1060-68.
- 20 66. Lee Y-Y, Lin JL. Do patient autonomy preferences matter? Linking patient-centered care  
21 to patient-physician relationships and health outcomes. *Social Science & Medicine*  
22 2010;71(10):1811-18.
- 23 67. Kennedy A, Nelson E, Reeves D, et al. A randomised controlled trial to assess the impact  
24 of a package comprising a patient-orientated, evidence-based self-help guidebook and  
25 patient-centred consultations on disease management and satisfaction in inflammatory  
26 bowel disease. *Health technology assessment (Winchester, England)* 2003;7(28):iii, 1-  
27 113.
- 28 68. Kinnersley P, Stott N, Peters TJ, et al. The patient-centredness of consultations and  
29 outcome in primary care. *British Journal of General Practice* 1999;49(446):711-16.
- 30 69. Fremont A, Cleary P, Hargraves J, et al. Patient-centered processes of care and long-term  
31 outcomes of myocardial infarction. *Journal of General Internal Medicine*  
32 2001;16(12):800-08.
- 33 70. Riley DL, Stewart DE, Grace SL. Continuity of cardiac care: Cardiac rehabilitation  
34 participation and other correlates. *International Journal of Cardiology*  
35 2007;119(3):326-33.
- 36 71. Blasi ZD, Harkness E, Ernst E, et al. Influence of context effects on health outcomes: a  
37 systematic review. *The Lancet* 2001;357(9258):757-62.
- 38 72. Hall AM, Ferreira PH, Maher CG, et al. The Influence of the Therapist-Patient  
39 Relationship on Treatment Outcome in Physical Rehabilitation: A Systematic Review.  
40 *Physical Therapy* 2010;90(8):1099-110.
- 41 73. Stevenson FA, Cox K, Britten N, et al. A systematic review of the research on  
42 communication between patients and health care professionals about medicines: the  
43 consequences for concordance. *Health Expectations* 2004;7(3):235-45.
- 44 74. Hall JA, Roter DL, Katz NR. Meta-analysis of correlates of provider behavior in medical  
45 encounters. *Medical Care* 1988;26(7):657-75.
- 46 75. Stewart MA. Effective physician-patient communication and health outcomes: a review.  
47 *Canadian Medical Association Journal* 1995;152(9):1423-33.
- 48 76. Beck RS, Daughtridge R, Sloane PD. Physician-patient communication in the primary  
49 care office: a systematic review. *The Journal of the American Board of Family*  
50 *Practice* 2002;15(1):25-38.
- 51  
52  
53  
54  
55  
56  
57  
58  
59  
60

1  
2  
3  
4  
5  
6  
7  
8  
9  
10  
11  
12  
13  
14  
15  
16  
17  
18  
19  
20  
21  
22  
23  
24  
25  
26  
27  
28  
29  
30  
31  
32  
33  
34  
35  
36  
37  
38  
39  
40  
41  
42  
43  
44  
45  
46  
47  
48  
49  
50  
51  
52  
53  
54  
55  
56  
57  
58  
59  
60

77. Richards HL, Fortune DG, Griffiths CEM. Adherence to treatment in patients with psoriasis. *Journal of the European Academy of Dermatology and Venereology* 2006;20(4):370-79.

For peer review only

|                               |                                                                                                                                                                                                                                                                                                                                                                                                                                                                                                                                                                                                                                                                              |
|-------------------------------|------------------------------------------------------------------------------------------------------------------------------------------------------------------------------------------------------------------------------------------------------------------------------------------------------------------------------------------------------------------------------------------------------------------------------------------------------------------------------------------------------------------------------------------------------------------------------------------------------------------------------------------------------------------------------|
| <b>Title</b>                  | A review of evidence on the links between patient experience and clinical safety and effectiveness                                                                                                                                                                                                                                                                                                                                                                                                                                                                                                                                                                           |
| <b>Authors</b>                | <p>Cathal Doyle- Program Lead for Evaluation, NIHR CLAHRC for North West London<sup>1</sup></p> <p>Laura Lennox- Research Assistant, NIHR CLAHRC for North West London<sup>1</sup> and Imperial College London<sup>2</sup></p> <p>Derek Bell- Professor of Acute Medicine, NIHR CLAHRC for North West London<sup>1</sup> and Imperial College London<sup>2</sup></p> <p><sup>1,2</sup> Chelsea and Westminster Hospital, 369 Fulham Road, London, SW10 9NH, UK</p>                                                                                                                                                                                                           |
| <b>Corresponding Author</b>   | <p>Name: Cathal Doyle</p> <p>Address: CLAHRC NWL, Floor 4 Lift Bank D, Chelsea &amp; Westminster Hospital, 369 Fulham Road, London, SW10 9NH, UK</p> <p>Email: c.doyle@imperial.ac.uk</p> <p>Telephone (office): 0203 315 3392</p> <p>"The Corresponding Author has the right to grant on behalf of all authors and does grant on behalf of all authors, an exclusive licence (or non exclusive for government employees) on a worldwide basis to the BMJ Publishing Group Ltd to permit this article (if accepted) to be published in BMJ editions and any other BMJPG products and sublicences such use and exploit all subsidiary rights, as set out in our licence."</p> |
| <b>Keywords:</b>              | Health & safety, Quality in healthcare, Health policy, Patient experience, Patient safety                                                                                                                                                                                                                                                                                                                                                                                                                                                                                                                                                                                    |
| <b>Word Count</b>             | 2752                                                                                                                                                                                                                                                                                                                                                                                                                                                                                                                                                                                                                                                                         |
| <b>Funding and Disclaimer</b> | <p>NIHR CLAHRC for North West London</p> <p>Disclaimer: This article presents independent research commissioned by the National Institute for Health Research (NIHR) under the Collaborations for Leadership in Applied Health Research and Care (CLAHRC) programme for North West London. The views expressed in this publication are those of the author(s) and not necessarily those of the NHS, the NIHR or the Department of Health.</p>                                                                                                                                                                                                                                |

**Abstract**

Objective: To explore evidence on the links between patient experience and clinical safety and effectiveness outcomes.

Design: Systematic review

Setting: A wide range of settings within primary and secondary care including hospitals and primary care centres.

Participants: A wide range of demographic groups and age groups.

Primary and secondary outcome measures: A broad range of patient safety and clinical effectiveness outcomes including mortality, physical symptoms, length of stay and adherence to treatment.

Results: This study, summarizing evidence from 55 studies, indicates consistent positive associations between patient experience, patient safety and clinical effectiveness for a wide range of disease areas, settings, outcome measures and study designs. It demonstrates positive associations between patient experience and self-rated and objectively measured health outcomes; adherence to recommended clinical practice and medication; preventive care (such as health-promoting behavior, use of screening services and immunization); and resource use (such as hospitalization, length of stay and primary care visits). There is some evidence of positive associations between patient experience and measures of the technical quality of care and adverse events. Overall it was more common to find positive associations between patient experience and patient safety and clinical effectiveness than no associations.

Conclusion: The data presented show positive associations between patient experience and clinical effectiveness and patient safety and supports the case for the inclusion of patient experience as one of the central pillars of quality in health care. It supports the argument that the three dimensions of quality should be looked at as a group and not in isolation. Clinicians should resist sidelining patient experience as too subjective or mood-orientated, divorced from the 'real' clinical work of measuring safety and effectiveness.

Trial registration: This review was not registered.

## Article Summary

### Article focus:

- Should patient experience, as advocated by the Institute of Medicine and the NHS Outcomes Framework, be seen as one of the pillars of quality in health care alongside patient safety and clinical effectiveness?
- What aspects of patient experience can be linked to clinical effectiveness and patient safety outcomes?
- What evidence is available on the links between patient experience and clinical effectiveness and patient safety outcomes?

### Key Messages:

- The results show that patient experience is consistently positively associated with patient safety and clinical effectiveness across a wide range of disease areas, study designs, settings, population groups and outcome measures.
- Patient experience is positively associated with: self-rated and objectively measured health outcomes; adherence to recommended medication and treatments; preventative care such as use of screening services and immunizations; healthcare resource use such as hospitalization and primary care visits; technical quality of care delivery and adverse events.
- This study supports the argument that patient experience, clinical effectiveness and patient safety are linked and should be looked at as a group.

### Strengths and limitations of this study:

- This study demonstrates an approach to designing a systematic review for the 'catch-all' term patient experience, and brings together evidence from a variety of sources that may otherwise remain dispersed.
- This was a time-limited review and there is scope to expand this search based on the results and broaden the search terms to uncover further evidence.

## Introduction

Patient experience is increasingly recognized as one of the three pillars of quality in healthcare alongside clinical effectiveness and patient safety.<sup>1</sup> In the NHS the measurement of patient experience data to identify strengths and weaknesses of health care delivery, drive quality improvement, inform commissioning and promote patient choice is now mandatory.<sup>2 3 4</sup> In addition to data on harm avoidance or success rates for treatments, providers are now assessed on aspects of care such as dignity and respect, compassion and involvement in care decisions.<sup>4</sup> In England these data are published in Quality Accounts and the Commissioning for Quality & Innovation (CQUINs) payment framework which makes a proportion of care providers' income conditional on improvement in this domain.<sup>5</sup>

The inclusion of patient experience as a pillar of quality is often justified on the grounds of its intrinsic value – that the expectation of humane, empathic care is a given and requires no further justification. It is also justified on more utilitarian grounds as a means of improving patient safety and clinical effectiveness.<sup>6 7</sup> For example, clear information, empathic, two-way communication and respect for patients' beliefs and concerns could lead to patients being more informed and involved in decision making and create an environment where patients are more willing to disclose information. Patients could have more 'ownership' of clinical decisions, entering a 'therapeutic alliance' with clinicians. This could support improved and more timely diagnosis, clinical decisions and advice and lead to fewer unnecessary referrals or diagnostic tests.<sup>8 9</sup> Increased patient agency can encourage greater participation in personal care, compliance with medication, adherence to recommended treatment, and monitoring of prescriptions and dose.<sup>9 10</sup> Patients can be informed about what to expect from treatment and be motivated to report adverse events or complications and keep a list of their medical histories, allergies, and current medications.<sup>11</sup>

Patients' direct experience of care process through clinical encounters or as an observer (for example, as a patient on a hospital ward) can provide valuable insights into everyday care. Examples include attention to pain control, assistance with bathing or help with feeding, the environment (cleanliness, noise, physical safety) and coordination of care between professions or organizations. Given the organizational fragmentation of much of healthcare and the numerous services with which many patients interact, the measurement of patient experience may help provide a 'whole system' perspective not readily available from more discrete patient safety and clinical effectiveness measures.<sup>11</sup>

Focusing on such utilitarian arguments, this study reviews evidence on links that have been demonstrated between patient experience and clinical effectiveness and patient safety.

## Methods

### *Identifying variables relevant to patient experience*

Patient experience is a term that encapsulates a number of dimensions and in preliminary database searches this phrase on its own uncovered a limited number of useful studies. To broaden and structure the search for evidence, identify search terms and provide a framework for analysis it was necessary to identify what patient experience entails and outline potential mechanisms through which it is proposed to impact on safety and effectiveness. As such, we combined common elements from patient experience frameworks produced by The Institute of Medicine<sup>1</sup>, Picker Institute<sup>12</sup> and NICE.<sup>13</sup>

Table 1 delineates different dimensions of patient experience and distinguishes between 'relational' and 'functional' aspects.<sup>10 14</sup> Relational aspects refer to interpersonal aspects of care – the ability of clinicians to empathise, respect the preferences of patients, include them in decision making and

provide information to enable self-care.<sup>10</sup> It also refers to patients' expectations that professionals will put their interest above other considerations and be honest and transparent when something goes wrong.<sup>8 15</sup> Functional aspects relate to basic expectations about how care is delivered, such as attention to physical needs, timeliness of care, clean and safe environments, effective coordination between professionals and continuity.

**Table 1: Identifying aspects of patient experience and search terms**

| <b>Relational aspects</b>                                                                                                                                                                           | <b>Functional aspects</b>                                                                               |
|-----------------------------------------------------------------------------------------------------------------------------------------------------------------------------------------------------|---------------------------------------------------------------------------------------------------------|
| Emotional and psychological support, relieving fear and anxiety, treated with respect, kindness, dignity, compassion, understanding                                                                 | Effective treatment delivered by trusted professionals                                                  |
| Participation of patient in decisions and respect and understanding for beliefs, values, concerns, preferences and their understanding of their condition                                           | Timely, tailored and expert management of physical symptoms                                             |
| Involvement of, and support for family and carers in decisions                                                                                                                                      | Attention to physical support needs and environmental needs (e.g. clean, safe, comfortable environment) |
| Clear, comprehensible information and communication tailored to patient needs to support informed decisions (awareness of available options, risks and benefits of treatments) and enable self-care | Coordination and continuity of care; smooth transitions from one setting to another                     |
| Transparency, honesty, disclosure when something goes wrong                                                                                                                                         |                                                                                                         |

Using these frameworks and discursive documents in this area of research<sup>10 16 17 9</sup> as a guide we identified words and phrases commonly used to denote aspects of patient experience, examples of which are listed in Table 2.

**Table 2: Search terms denoting patient experience:**

patient-centred care; patient engagement; clinical interaction; patient-clinician; clinician-patient; patient-doctor; doctor-patient; physician-patient; patient-physician; patient-provider; interpersonal treatment; physician discussion; trust in physician; empathy; compassion; respect; responsiveness; patient preferences; shared decision making; therapeutic alliance; participation in decisions; decision making; autonomy; caring; kindness; dignity; honesty; participation; right to decide; physical comfort; involvement (of family, carers, friends); emotional support; continuity (of care); smooth transition; emotional support;



1  
2  
3 These were combined with search terms representing patient safety and clinical effectiveness  
4 outcomes hypothesized to be associated with patient experience in discursive literature. We  
5 searched for a broad range of outcome measures, including both self-rated and 'objective'  
6 measurements of health status, physical and mental health and wellbeing, the use of preventive  
7 health services, compliance or adherence to health-promoting behavior and resource use.  
8

9  
10 Combining these two sets of search terms in the EMBASE database, we identified 5323 papers  
11 whose abstracts were then reviewed. If deemed relevant the full article was retrieved to assess  
12 whether it met the inclusion criteria.

13  
14 (REVISED TEXT) Given concerns about the sole use of protocol-driven search strategies for complex  
15 evidence,<sup>18</sup> for the full text articles retrieved for review, we used a 'snowballing' approach to  
16 identify further studies. This involved sourcing further articles in these studies for assessment and  
17 using the 'related articles' function in the PubMed database. We repeated this for new articles  
18 identified until the approach ceased to identify new studies.  
19

20  
21 *Inclusion criteria, assessment of quality and categorisation of evidence*

22 We included studies that measured associations between patients' reporting of their experience and  
23 patient safety and clinical effectiveness outcomes. These included studies measuring associations  
24 between patient experience and safety or effectiveness outcomes either at a patient level (i.e data  
25 on both types of variables for the same patients) or at an organizational level (i.e. associations  
26 between aggregated measures of patient experience and safety and effectiveness outcomes for the  
27 same type of organisation such as a hospital or primary care practice).  
28

29  
30 We included studies where the variables denoting patient experience and patient safety and clinical  
31 effectiveness were measured in a credible way, through the use of validated tools. For patient  
32 experience variables these include surveys covering several aspects of experience (such as Picker  
33 Surveys and the Hospital Consumer Assessment of Healthcare Providers and Systems survey) and  
34 specific aspects (such as a 'Working Alliance Scale'<sup>19</sup>, Multidimensional Health Locus of Control  
35 Scale (MHLC) scale<sup>20</sup> or Usual Provider Continuity (UPC) index<sup>21</sup>). For patient safety and clinical  
36 effectiveness these include, for example, generic health and quality of life surveys (such as Short-  
37 Form 36 (SF36)), disease-specific surveys (such as the Seattle Angina Questionnaire<sup>22</sup>), measures of  
38 the technical quality of care (such as the Hospital Quality Alliance (HQA) score), reviews of medical  
39 records and care provider data.<sup>23</sup> Details of the methods used to measure variables in each study are  
40 included in Tables 6 and 7.  
41

42 We included studies where the sample size of patients or organizations appeared sufficiently large to  
43 conduct meaningful statistical analysis (excluding studies with fewer than 50 subjects). When  
44 extracting data relevant to our study from systematic reviews we selected only those studies that  
45 met these criteria.  
46  
47

48 (REVISED TEXT) We then searched the studies' results for positive associations (where a better  
49 patient experience is associated with safer or more effective care), negative associations (where a  
50 better patient experience is associated with less safe or less effective care) and no associations.  
51 Associations refer to cases where one measure of patient experience (typically an overall rating of  
52 patient experience for a care provider) has a statistically significant association with one or more  
53 clinical effectiveness or patient safety variable. If a study showed associations between several  
54 aspects of patient experience that appeared to be closely related (for example, 'listening',  
55 'empathy', or 'respect') and an aspect of effectiveness or safety, this was counted as one association  
56 found. This was to avoid exaggerating the weight of the evidence by 'over counting' associations.  
57  
58  
59  
60



Two main types of studies emerged in the search – those focusing on interventions to improve aspects of patient experience and those exploring associations between patient experience variables and patient safety and clinical effectiveness variables. To manage the scope of this time-limited review we decided to restrict analysis of the large number of interventions to the evidence contained within systematic reviews.

### Results

Overall, the evidence indicates positive associations between patient experience and patient safety and clinical effectiveness that appear consistent across a range of disease areas, study designs, settings, population groups and outcome measures. Positive associations found outweigh 'no associations' by 429 to 127. Of the four studies where 'no associations' outweigh positive associations there is no suggestion that these are methodologically superior. (REVISED TEXT) Negative associations were rare. Of the 40 individual studies assessed in Table 6 negative associations (between patient experience of clinical team interactions and continuity of care and separate assessment of the quality of clinical care) were found in only one study.<sup>24</sup>

Table 3 shows surveys to be the predominant method used to measure variables for individual studies.

**Table 3: Methods used to measure variables**

|                                                                   | No of studies |
|-------------------------------------------------------------------|---------------|
| <b>Patient experience variables</b>                               |               |
| Survey                                                            | 31            |
| Interviews                                                        | 2             |
| Medical records                                                   | 1             |
| <b>Effectiveness &amp; safety variables</b>                       |               |
| Survey for self-rated healthcare                                  | 12            |
| Other survey                                                      | 14            |
| Medical records                                                   | 3             |
| Data monitoring quality of care delivery (e.g. audit, HQA, HEDIS) | 3             |
| Care provider outcome data                                        | 3             |
| Physical examination                                              | 1             |
| Patient interviews                                                | 2             |

Chart 1 outlines the disease areas covered. (Chart 1 inserted here)

Table 4 presents the frequency of positive associations and 'no associations' categorized by type of outcomes (for 378 of the 556 cases where sufficient information was available to categorise). These include; objectively measured health outcomes (for example, 'mortality', 'blood glucose levels',

'infections', 'medical errors'); self-reported health and wellbeing outcomes (for example, 'health status', 'functional ability' 'quality of life', 'anxiety' ); adherence to recommended treatment and use of preventive care services likely to improve health outcomes (for example, 'medication compliance', 'adherence to treatment' and screening for a variety of conditions); outcomes related to healthcare resource use (for example 'hospitalizations', 'hospital readmission', 'emergency department use', 'primary care visits'); errors or adverse events and measures of the technical quality of care.

**Table 4: Associations categorised by type of outcome**

|                                    | Objective' health outcomes | Self-reported health and wellbeing | Adherence to treatment (including medication) | Preventive care | Healthcare resource use | Adverse events | Technical quality of care | All categories |
|------------------------------------|----------------------------|------------------------------------|-----------------------------------------------|-----------------|-------------------------|----------------|---------------------------|----------------|
| No. of positive associations found | 29                         | 61                                 | 152                                           | 24              | 31                      | 7              | 8                         | 312            |
| 'No associations'                  | 11                         | 36                                 | 7                                             | 2               | 6                       | 0              | 4                         | 66             |

Table 5 shows associations categorised by type of care provider (for the subset of studies focusing on one setting) and for studies focused on chronic conditions.

**Table 5: Weight of evidence by provider and for chronic conditions**

| Weight of evidence by provider and for chronic conditions | Associations found | No associations |
|-----------------------------------------------------------|--------------------|-----------------|
| Primary care                                              | 110                | 48              |
| Hospital                                                  | 43                 | 17              |
| Chronic conditions                                        | 53                 | 9               |

Tables 6 and 7 present details of all studies identified, specifying the analytical focus of each study, methods to measure variables and positive associations and 'no associations' found.

## Discussion

Overall, the evidence indicates associations between patient experience, clinical effectiveness and patient safety that appear consistent across a range of disease areas, study designs and settings.

As Table 4 indicates, the evidence shows positive associations found outweigh those not found for both self-assessment of physical and mental health (61 vs 36) and 'objective' measures of health outcomes (e.g. where measures are taken by a clinician or by reviewing medical records) (29 vs 11). For objective measures, one study<sup>25</sup> shows positive associations for ulcer disease, hypertension and breast cancer. Two studies on myocardial infarction show positive associations with survival one year after discharge<sup>26</sup> and inpatient mortality.<sup>27</sup> Objective measurement is less frequently explored than self-rated health and is an area that could benefit from further research.

1  
2  
3 Evidence is strong in the case of adherence to recommended medical treatment. A meta-analysis  
4 included in this study showed positive associations between the quality of clinician-patient  
5 communications and adherence to medical treatment in 125 out of 127 studies analysed and  
6 showed the odds of patient adherence was 1.62 times higher where physicians had communication  
7 training.<sup>28</sup> Regarding compliance with medication, positive associations found outweigh those not  
8 found.<sup>20 29-35</sup> A review of interventions to increase adherence to medication (not included in this  
9 study) showed communication of information, good provider-patient relationships and patients'  
10 agreement with the need for treatment as common determinants of effectiveness.<sup>36</sup> There is  
11 evidence of better use of preventive services, such as screening services in diabetes, colorectal,  
12 breast and cervical cancer; cholesterol testing and immunization.<sup>24 25 37-39</sup> There is also evidence of  
13 impacts on resource use of primary and secondary care (such as hospitalizations, readmissions and  
14 primary care visits).<sup>21 29 40-45</sup>

15  
16  
17 For studies exploring associations between patient experience and technical quality of care  
18 measured by other means, the evidence is mixed. Two studies in acute care showed positive  
19 associations between overall ratings of patient experience and ratings of the technical quality of care  
20 (using Hospital Quality Alliance (HQA) measures)<sup>23 46</sup> for myocardial infarction, congestive heart failure,  
21 pneumonia and complications from surgery.<sup>23 46</sup> Another found an association with adherence to  
22 clinical guidelines for acute myocardial infarction.<sup>27</sup> A similar study in primary care found positive  
23 associations between patient experience of processes and measurement of care quality (from the  
24 HEDIS system measuring care quality for disease prevention and management in chronic conditions).  
25<sup>24</sup> However, two other studies found no associations between patients' ratings and ratings based  
26 on an assessment of medical records.<sup>47 48</sup>

27  
28  
29 Some studies show positive associations between patients' perspective or observations of processes  
30 of care and the safety of care recorded through other means. Isaac<sup>46</sup> found positive associations  
31 between ratings of patient experience and six patient safety indicators (decubitus ulcer; failure to  
32 rescue; infections due to medical care; postoperative hemorrhage, respiratory failure, pulmonary  
33 embolism and sepsis). Two studies examining evidence for patients' ability to identify medical errors  
34 or adverse events in hospital showed positive associations between patients' accounts of their  
35 experience of adverse events and the documentation of events in medical records.<sup>49 50</sup> But another  
36 study shows only 2% of patient-reported errors were classified by medical reviewers as 'real clinical  
37 medical errors' with most 'reclassified' by clinicians as 'misunderstandings' or 'behaviour or  
38 communication problems'.<sup>51</sup> Overall there is less evidence available on safety compared to  
39 effectiveness and this should be a priority for future research in this area.

40  
41  
42 Research from other studies not included in this review support these findings. For example,  
43 research on 'decision aids' to ensure patients are well informed about their treatments and that  
44 decisions reflect the preferences of patients indicates that patient engagement has a beneficial  
45 impact on outcomes. For example, awareness of the risks of surgical procedures resulted in a 23%  
46 reduction in surgical interventions and better functional status.<sup>52</sup> Another review showed that  
47 provision of good information and emotional support are associated with better recovery from  
48 surgery and heart attacks.<sup>53</sup>

### 50 **Study strengths and limitations**

51 This review builds on other studies<sup>9 10 16 17</sup> exploring links between these three domains. This study  
52 also demonstrates an approach to designing a systematic search for evidence for the 'catch-all' term  
53 patient experience, bringing together evidence from a variety of sources that may otherwise remain  
54 dispersed. This approach can be used or adapted for further research in this area.

1  
2  
3 This was a time-limited review and there is scope to expand this search based on our results. There  
4 may be scope to broaden the search terms and this may uncover further evidence. The first search  
5 was confined to one database and the review focused primarily on peer-reviewed literature  
6 excluding gray literature. To manage the scope of this review we restricted the analysis of  
7 interventions to improve patient experience to evidence within systematic reviews. **NEW TEXT**  
8 **While we used some quality criteria to filter studies (including the use of validated tools to measure**  
9 **experience, safety and effectiveness outcomes and sample size), with more time a more detailed**  
10 **formal quality assessment may have added value to the study.** Although all positive associations  
11 included in the study are statistically significant, the strength of associations vary. Due to time  
12 constraints and the heterogeneity of measures used we did not systematically compare the  
13 strengths of positive associations in different studies but this may be an area for future work. **NEW**  
14 **TEXT There may also be scope to explore whether future research in this area could go beyond the**  
15 **counting of associations in this study through, for example, meta-analysis.** As always, there may be  
16 a publication bias in favour of studies showing positive associations between patient experience  
17 variables and safety and effectiveness outcomes.<sup>54</sup> In addition, 28 of the 40 individual studies  
18 assessed were conducted in the United States and caution is needed about their applicability to  
19 other healthcare systems.  
20  
21

22 *(Next 3 paragraphs replaced with a reworded conclusion below)*

23 Although there are areas that would benefit from further research, the data presented supports the  
24 view that patient experience data, robustly collected and analysed, may highlight strengths and risks  
25 in effectiveness and safety and that focusing on improving patient experience will increase the  
26 likelihood of improvements in the other two domains. There are aspects of patient experience that  
27 will help to explain performance in safety and effectiveness and vice-versa.  
28  
29

### 30 **Conclusion**

31 The evidence suggests that attention to these various dimensions of patient-centred care outlined in  
32 Table 1 may result in important clinical benefits and more effective use of health care resources,  
33 particularly for chronic conditions, where most healthcare resources are consumed. There is also  
34 some evidence to suggest that patients can be used as partners in identifying poor and unsafe  
35 practice and help enhance quality and safety.  
36  
37

38 This supports the argument that the three measures should be looked at as a group and not in  
39 isolation. Clinicians should resist sidelining patient experience measures as too subjective or mood-  
40 orientated, divorced from the 'real' clinical work of measuring and delivering safety and  
41 effectiveness.  
42  
43

### 44 **Conclusion**

45 **(REVISED CONCLUSION) The inclusion of patient experience as one of the pillars of quality is partly**  
46 **justified on the grounds that patient experience data, robustly collected and analyzed, may help**  
47 **highlight strengths and weaknesses in effectiveness and safety and that focusing on improving**  
48 **patient experience will increase the likelihood of improvements in the other two domains.<sup>3</sup>**  
49

50 The evidence collated in this study demonstrates positive associations between patient experience  
51 and the other two domains of quality. Because associations do not entail causality, this does not  
52 necessarily prove that improvements in patient experience will cause improvements in the other  
53 two domains. However, the weight of evidence across different areas of healthcare indicates that  
54 patient experience is clinically important. There is also some evidence to suggest that patients can  
55 be used as partners in identifying poor and unsafe practice and help enhance effectiveness and  
56 safety. This supports the argument that the three dimensions of quality should be looked at as a  
57 group and not in isolation. Clinicians should resist sidelining patient experience measures as too  
58  
59  
60

1  
2  
3 subjective or mood-orientated, divorced from the 'real' clinical work of measuring and delivering  
4 patient safety and clinical effectiveness.  
5  
6  
7  
8  
9  
10  
11  
12  
13  
14  
15  
16  
17  
18  
19  
20  
21  
22  
23  
24  
25  
26  
27  
28  
29  
30  
31  
32  
33  
34  
35  
36  
37  
38  
39  
40  
41  
42  
43  
44  
45  
46  
47  
48  
49  
50  
51  
52  
53  
54  
55  
56  
57  
58  
59  
60

For peer review only

Table 6: Individual studies

| Author                            | Type of study, sample size, country        | Setting                   | Disease focus                                                                                  | Unit of analysis (Patient (P) or org (O)) | Patient experience focus and method used -                                                                                                                                   | Safety & effectiveness measure -                                                                                                                     | Association demonstrated                                                                                                                                                                                             | Association NOT demonstrated                                                           | Assoc. Found vs NOT found |
|-----------------------------------|--------------------------------------------|---------------------------|------------------------------------------------------------------------------------------------|-------------------------------------------|------------------------------------------------------------------------------------------------------------------------------------------------------------------------------|------------------------------------------------------------------------------------------------------------------------------------------------------|----------------------------------------------------------------------------------------------------------------------------------------------------------------------------------------------------------------------|----------------------------------------------------------------------------------------|---------------------------|
| Chang et al. 2006 <sup>48</sup>   | Cohort study, 236 patients, US             | Managed care organisation | 22 clinical conditions                                                                         | P                                         | Providers communication (The Consumer Assessment of Healthcare Providers and Systems survey and 'Quality of care')                                                           | Technical quality and patient global ratings (Medical records and patient interviews)                                                                | None                                                                                                                                                                                                                 | Technical quality of care                                                              | 0/1                       |
| Sequist et al. 2008 <sup>24</sup> | Cross-sectional study, 492 settings, US    | Primary care              | Cervical, breast and colorectal cancer, chlamydia, cardiovascular conditions, asthma, diabetes | P                                         | Doctor-patient communication, clinical team interactions, organizational features of care (The Ambulatory Care Experiences Survey)                                           | Clinical quality focusing on disease prevention, disease management and outcomes of care (Healthcare Effectiveness Data and Information Set (HEDIS)) | Cervical cancer, breast cancer and colorectal cancer screening, Chlamydia screening, Cholesterol screening (cardiac), LDL cholesterol testing (diabetes), eye exams (diabetes), HbA1c testing, nephropathy screening | Cholesterol management, HbA1c control, LDL cholesterol control, blood pressure control | 9/4                       |
| Burgers et al. 2010 <sup>55</sup> | Survey, 8973 patients, Range               | Range of settings         | Chronic lung, mental health, hypertension, heart disease, diabetes, arthritis, cancer          | P                                         | Coordination of care and overall experience (Commonwealth Fund International Health Policy Survey)                                                                           | Morbidity score                                                                                                                                      | Morbidity score                                                                                                                                                                                                      | None                                                                                   | 1/0                       |
| Kaplan et al. 1989 <sup>25</sup>  | Randomised control trial, 252 patients, US | Range of settings         | Ulcer disease, hypertension, diabetes, breast cancer                                           | P                                         | Physician-patient communication (Assessment of audio tape and questionnaire)                                                                                                 | Physiologic measures taken at visit and patients' self-rated health status survey.                                                                   | Follow up blood glucose and blood pressure, functional health status, self reported health status.                                                                                                                   | None                                                                                   | 4/0                       |
| Jha et al. 2008 <sup>23</sup>     | Cross-sectional study, 2429 settings, US   | Hospital                  | Acute myocardial infarction, congestive heart failure, pneumonia complications from surgery    | O                                         | Patient communication with clinicians, experience of nursing services, discharge planning (Hospital Consumer Assessment of Healthcare Providers and Systems (HCAHPS) survey) | Technical quality of care using Hospital Quality Alliance (HQA) score                                                                                | Technical quality of care in AMI, CHF, pneumonia, surgical care                                                                                                                                                      | None                                                                                   | 4/0                       |

|    |                                       |                                                   |                                 |                                     |   |                                                                                                                                                                                                          |                                                                                                                                        |                                                                                                                                  |                                                             |     |
|----|---------------------------------------|---------------------------------------------------|---------------------------------|-------------------------------------|---|----------------------------------------------------------------------------------------------------------------------------------------------------------------------------------------------------------|----------------------------------------------------------------------------------------------------------------------------------------|----------------------------------------------------------------------------------------------------------------------------------|-------------------------------------------------------------|-----|
| 1  |                                       |                                                   |                                 |                                     |   |                                                                                                                                                                                                          |                                                                                                                                        |                                                                                                                                  |                                                             |     |
| 2  |                                       |                                                   |                                 |                                     |   |                                                                                                                                                                                                          |                                                                                                                                        |                                                                                                                                  |                                                             |     |
| 3  |                                       |                                                   |                                 |                                     |   |                                                                                                                                                                                                          |                                                                                                                                        |                                                                                                                                  |                                                             |     |
| 4  |                                       |                                                   |                                 |                                     |   |                                                                                                                                                                                                          |                                                                                                                                        |                                                                                                                                  |                                                             |     |
| 5  | Rao et al. 2006 <sup>47</sup>         | Cross sectional study, 3487 patients, UK          | Primary care                    | Hypertension, Influenza vaccination | P | Older patients' experience of technical quality of care (General Practice Assessment survey)                                                                                                             | Technical quality of care - (medical records)                                                                                          | None                                                                                                                             | Hypertension monitoring and control, influenza vaccination. | 0/3 |
| 6  |                                       |                                                   |                                 |                                     |   |                                                                                                                                                                                                          |                                                                                                                                        |                                                                                                                                  |                                                             |     |
| 7  |                                       |                                                   |                                 |                                     |   |                                                                                                                                                                                                          |                                                                                                                                        |                                                                                                                                  |                                                             |     |
| 8  |                                       |                                                   |                                 |                                     |   |                                                                                                                                                                                                          |                                                                                                                                        |                                                                                                                                  |                                                             |     |
| 9  | Meterko et al. 2010 <sup>26</sup>     | Cohort study, 1858 patients, US                   | Veteran Affairs Medical Centres | Acute myocardial infarction         | P | Patient-centred care, access, courtesy, information, coordination, patient preferences, emotional support, family involvement, physical comfort (VA Survey of Healthcare Experiences of Patients (SHEP)) | Survival 1-year post discharge                                                                                                         | Survival 1-year post discharge                                                                                                   | None                                                        | 1/0 |
| 10 |                                       |                                                   |                                 |                                     |   |                                                                                                                                                                                                          |                                                                                                                                        |                                                                                                                                  |                                                             |     |
| 11 |                                       |                                                   |                                 |                                     |   |                                                                                                                                                                                                          |                                                                                                                                        |                                                                                                                                  |                                                             |     |
| 12 |                                       |                                                   |                                 |                                     |   |                                                                                                                                                                                                          |                                                                                                                                        |                                                                                                                                  |                                                             |     |
| 13 |                                       |                                                   |                                 |                                     |   |                                                                                                                                                                                                          |                                                                                                                                        |                                                                                                                                  |                                                             |     |
| 14 |                                       |                                                   |                                 |                                     |   |                                                                                                                                                                                                          |                                                                                                                                        |                                                                                                                                  |                                                             |     |
| 15 |                                       |                                                   |                                 |                                     |   |                                                                                                                                                                                                          |                                                                                                                                        |                                                                                                                                  |                                                             |     |
| 16 |                                       |                                                   |                                 |                                     |   |                                                                                                                                                                                                          |                                                                                                                                        |                                                                                                                                  |                                                             |     |
| 17 | Vincent et al. 1994 <sup>56</sup>     | Cohort Survey 227 patients, UK                    | Range of settings               | Varied                              | P | Accountability, explanation, standards of care, compensation (Questionnaire)                                                                                                                             | Legal action                                                                                                                           | Legal action                                                                                                                     | None                                                        | 1/0 |
| 18 |                                       |                                                   |                                 |                                     |   |                                                                                                                                                                                                          |                                                                                                                                        |                                                                                                                                  |                                                             |     |
| 19 |                                       |                                                   |                                 |                                     |   |                                                                                                                                                                                                          |                                                                                                                                        |                                                                                                                                  |                                                             |     |
| 20 |                                       |                                                   |                                 |                                     |   |                                                                                                                                                                                                          |                                                                                                                                        |                                                                                                                                  |                                                             |     |
| 21 |                                       |                                                   |                                 |                                     |   |                                                                                                                                                                                                          |                                                                                                                                        |                                                                                                                                  |                                                             |     |
| 22 | Agoritsas et al. 2005 <sup>57</sup>   | Cohort patient survey, 1518 patients, Switzerland | Hospital                        | Varied                              | P | Global rating of care and respect and dignity questions (Picker survey)                                                                                                                                  | Patient reports of undesirable events (survey)                                                                                         | Neglect of important information by health care staff, pain control, needless repetition of a test, being handled with roughness | None                                                        | 4/0 |
| 23 |                                       |                                                   |                                 |                                     |   |                                                                                                                                                                                                          |                                                                                                                                        |                                                                                                                                  |                                                             |     |
| 24 |                                       |                                                   |                                 |                                     |   |                                                                                                                                                                                                          |                                                                                                                                        |                                                                                                                                  |                                                             |     |
| 25 |                                       |                                                   |                                 |                                     |   |                                                                                                                                                                                                          |                                                                                                                                        |                                                                                                                                  |                                                             |     |
| 26 | Flocke et al. 1998 <sup>37</sup>      | Cross-sectional study, 2889 patients, US          | Primary care                    | Varied                              | P | Interpersonal communication, physician's knowledge of patient, coordination (Components of Primary Care Instrument (CPCI))                                                                               | Use of preventive care services (screening, health habit counselling services, immunization services)                                  | Screening, health habit counselling, immunization                                                                                | None                                                        | 3/0 |
| 27 |                                       |                                                   |                                 |                                     |   |                                                                                                                                                                                                          |                                                                                                                                        |                                                                                                                                  |                                                             |     |
| 28 |                                       |                                                   |                                 |                                     |   |                                                                                                                                                                                                          |                                                                                                                                        |                                                                                                                                  |                                                             |     |
| 29 |                                       |                                                   |                                 |                                     |   |                                                                                                                                                                                                          |                                                                                                                                        |                                                                                                                                  |                                                             |     |
| 30 |                                       |                                                   |                                 |                                     |   |                                                                                                                                                                                                          |                                                                                                                                        |                                                                                                                                  |                                                             |     |
| 31 |                                       |                                                   |                                 |                                     |   |                                                                                                                                                                                                          |                                                                                                                                        |                                                                                                                                  |                                                             |     |
| 32 | Jackson, J. et al. 2001 <sup>58</sup> | Quantitative Cohort study 500 patients, US        | General medicine walk-in clinic | Varied                              | P | Patient satisfaction (RAND 9-item survey)                                                                                                                                                                | Functional status (Medical Outcomes Study Short-Form Health Survey [SF-6]), symptom resolution, (RAND 9-item survey), follow-up visits | Symptom resolution, repeat visits, functional status                                                                             | None                                                        | 3/0 |
| 33 |                                       |                                                   |                                 |                                     |   |                                                                                                                                                                                                          |                                                                                                                                        |                                                                                                                                  |                                                             |     |
| 34 |                                       |                                                   |                                 |                                     |   |                                                                                                                                                                                                          |                                                                                                                                        |                                                                                                                                  |                                                             |     |
| 35 |                                       |                                                   |                                 |                                     |   |                                                                                                                                                                                                          |                                                                                                                                        |                                                                                                                                  |                                                             |     |
| 36 |                                       |                                                   |                                 |                                     |   |                                                                                                                                                                                                          |                                                                                                                                        |                                                                                                                                  |                                                             |     |
| 37 |                                       |                                                   |                                 |                                     |   |                                                                                                                                                                                                          |                                                                                                                                        |                                                                                                                                  |                                                             |     |
| 38 |                                       |                                                   |                                 |                                     |   |                                                                                                                                                                                                          |                                                                                                                                        |                                                                                                                                  |                                                             |     |
| 39 |                                       |                                                   |                                 |                                     |   |                                                                                                                                                                                                          |                                                                                                                                        |                                                                                                                                  |                                                             |     |
| 40 |                                       |                                                   |                                 |                                     |   |                                                                                                                                                                                                          |                                                                                                                                        |                                                                                                                                  |                                                             |     |
| 41 |                                       |                                                   |                                 |                                     |   |                                                                                                                                                                                                          |                                                                                                                                        |                                                                                                                                  |                                                             |     |
| 42 |                                       |                                                   |                                 |                                     |   |                                                                                                                                                                                                          |                                                                                                                                        |                                                                                                                                  |                                                             |     |
| 43 |                                       |                                                   |                                 |                                     |   |                                                                                                                                                                                                          |                                                                                                                                        |                                                                                                                                  |                                                             |     |
| 44 |                                       |                                                   |                                 |                                     |   |                                                                                                                                                                                                          |                                                                                                                                        |                                                                                                                                  |                                                             |     |
| 45 |                                       |                                                   |                                 |                                     |   |                                                                                                                                                                                                          |                                                                                                                                        |                                                                                                                                  |                                                             |     |
| 46 |                                       |                                                   |                                 |                                     |   |                                                                                                                                                                                                          |                                                                                                                                        |                                                                                                                                  |                                                             |     |
| 47 |                                       |                                                   |                                 |                                     |   |                                                                                                                                                                                                          |                                                                                                                                        |                                                                                                                                  |                                                             |     |
| 48 |                                       |                                                   |                                 |                                     |   |                                                                                                                                                                                                          |                                                                                                                                        |                                                                                                                                  |                                                             |     |
| 49 |                                       |                                                   |                                 |                                     |   |                                                                                                                                                                                                          |                                                                                                                                        |                                                                                                                                  |                                                             |     |

|                                     |                                                   |                   |                       |   |                                                                                                                                 |                                                                                                                                                                          |                                                                                                |                 |     |
|-------------------------------------|---------------------------------------------------|-------------------|-----------------------|---|---------------------------------------------------------------------------------------------------------------------------------|--------------------------------------------------------------------------------------------------------------------------------------------------------------------------|------------------------------------------------------------------------------------------------|-----------------|-----|
| Clark et al. 2007 <sup>41</sup>     | Randomized control trial<br>731 patients,<br>US   | Range of settings | Asthma                | P | Patient experience of physician communication (Patient interviews and Likert Scale)                                             | Emergency department visits, hospitalizations, office phone calls and visits, urgent office visits (Survey + Medical chart review of 6% of patients to verify responses) | Number of office visits, emergency visits, urgent office visits, phone calls, hospitalizations | None            | 5/0 |
| Raiz et al. 1999 <sup>20</sup>      | Quantitative Cohort Study,<br>357 patients,<br>US | Primary care      | Renal transplant      | P | Patient faith in doctor (Multidimensional Health Locus of Control Scale (MHLC))                                                 | Medication compliance                                                                                                                                                    | Remembering medications, taking medications as prescribed                                      | None            | 2/0 |
| Kahn et al. 2007 <sup>32</sup>      | Cohort study,<br>881 patients,<br>US              | Hospitals         | Breast cancer         | P | Level of physician support, participation in decision-making and information on side effects (Survey)                           | Medication adherence                                                                                                                                                     | Ongoing tamoxifen use                                                                          | None            | 1/0 |
| Plomondon et al. 2008 <sup>22</sup> | Cohort study,<br>1815 patients,<br>US             | Hospital          | Myocardial infarction | P | Satisfaction with explanations from their doctor, overall satisfaction with treatment (Seattle Angina questionnaire)            | Presence of angina (Seattle Angina Questionnaire)                                                                                                                        | Presence of angina                                                                             | None            | 1/0 |
| Fuertes et al. 2008 <sup>19</sup>   | Survey, 152 patients, US                          | Hospital          | Neurology             | P | Physician-patient communication, Physician-Patient Working Alliance, Empathy, Multicultural Competence (Questionnaire)          | Adherence to medical treatment (Adherence Self-Efficacy Scale and Medical Outcome Study (MOS) Adherence Scale)                                                           | Adherence to treatment                                                                         | None            | 1/0 |
| Lewis et al. 2010 <sup>31</sup>     | Qualitative cohort study,<br>191 patients,<br>US  | Primary care      | Pain                  | P | Doctor-Patient Communication (Survey)                                                                                           | Medication adherence (Prescription Drug Use Questionnaire (PDUQ))                                                                                                        | Use of Prescribed Opioid Medications                                                           | None            | 1/0 |
| Safran et al. 1998 <sup>59</sup>    | Cross-sectional study,<br>7204 patients,<br>US    | Primary care      | Varied                | P | Accessibility, continuity, integration, clinical interaction, interpersonal aspects, trust (The Primary Care Assessment Survey) | Adherence to physician's advice, health status, health outcomes (Medical Outcomes Study (MOS), Behavioural Risk Factor Survey)                                           | Adherence, health status                                                                       | Health outcomes | 2/1 |



|                                    |                                              |              |                                                  |   |                                                                                                                  |                                                                                                                                                                                                                    |                                                                                                                                                                                             |                                                                                                                                                    |      |
|------------------------------------|----------------------------------------------|--------------|--------------------------------------------------|---|------------------------------------------------------------------------------------------------------------------|--------------------------------------------------------------------------------------------------------------------------------------------------------------------------------------------------------------------|---------------------------------------------------------------------------------------------------------------------------------------------------------------------------------------------|----------------------------------------------------------------------------------------------------------------------------------------------------|------|
| Alamo et al. 2002 <sup>60</sup>    | Randomized study, 81, Spain                  | Primary care | Chronic musculoskeletal pain (CMP), fibromyalgia | P | Patient centered-care ('Gatha-Res questionnaire' and follow-up phone call)                                       | Pain (Visual Analogue Scale (VAS) anxiety (Oldberg scale of anxiety and depression (GHQ))                                                                                                                          | Anxiety, number of tender points (pain)                                                                                                                                                     | Pain, pain intensity, pain as a problem, number of associated symptoms, depression, physical mobility, social isolation, emotional reaction, sleep | 2/10 |
| Fan et al. 2005 <sup>61</sup>      | Survey, 21689 patients, US                   | Primary care | Cardiac care, diabetes, COPD                     | P | Communication skills and humanistic qualities of primary care physician (Seattle Outpatient Satisfaction Survey) | Physical and emotional aspects, coping ability and symptom burden for angina, COPD and diabetes (Seattle Angina Questionnaire (SAQ), Obstructive Lung Disease Questionnaire (SOLDQ), Diabetes Questionnaire (SDQ)) | Patient ability to deal with all 3 diseases, education for diabetes patients, angina stability, physical limitation due to angina                                                           | Self-reported physical limitation for angina and COPD, symptom burden for diabetes, complications for diabetes                                     | 7/4  |
| O'Malley et al. 2004 <sup>38</sup> | Cross-sectional study, 961 patients, US      | Primary care | Varied                                           | P | Patient trust (Survey)                                                                                           | Use of preventive care services                                                                                                                                                                                    | Blood pressure measurement, height and weight measurement, cholesterol check, pap tests, breast cancer screening, colorectal cancer screening, discussion of diet, discussion on depression | None                                                                                                                                               | 8/0  |
| Little et al. 2001 <sup>62</sup>   | Survey, 865 patients, UK                     | Primary care | varied                                           | P | Patient centredness (Survey)                                                                                     | Enablement, symptom burden, resource use                                                                                                                                                                           | Enablement, symptom burden, referrals                                                                                                                                                       | Re-attendance, investigations                                                                                                                      | 3/2  |
| Levinson et al. 1997 <sup>63</sup> | Qualitative cohort study, 124 physicians, US | Primary care | Varied                                           | P | Physician-patient communication (Assessment of audiotape)                                                        | Malpractice                                                                                                                                                                                                        | Malpractice claims                                                                                                                                                                          | None                                                                                                                                               | 1/0  |

|    |                                                |                                                  |                   |                   |   |                                                                                                                                         |                                                                                                                                  |                                                                                                                                   |                                           |     |
|----|------------------------------------------------|--------------------------------------------------|-------------------|-------------------|---|-----------------------------------------------------------------------------------------------------------------------------------------|----------------------------------------------------------------------------------------------------------------------------------|-----------------------------------------------------------------------------------------------------------------------------------|-------------------------------------------|-----|
| 1  |                                                |                                                  |                   |                   |   |                                                                                                                                         |                                                                                                                                  |                                                                                                                                   |                                           |     |
| 2  |                                                |                                                  |                   |                   |   |                                                                                                                                         |                                                                                                                                  |                                                                                                                                   |                                           |     |
| 3  |                                                |                                                  |                   |                   |   |                                                                                                                                         |                                                                                                                                  |                                                                                                                                   |                                           |     |
| 4  |                                                |                                                  |                   |                   |   |                                                                                                                                         |                                                                                                                                  |                                                                                                                                   |                                           |     |
| 5  | Carcaine-Edinboro & Bradley 2008 <sup>39</sup> | Cross sectional study, 8488 patients, US         | Primary care      | Colorectal cancer | P | Patient-provider communication (Consumer Assessment of Healthcare Providers and Systems (CAHPS) survey)                                 | Colorectal Cancer screening, fecal occult blood testing, and colonoscopy (Medical Expenditure Panel Survey)                      | CRC screening, fecal occult blood testing, colonoscopy                                                                            | None                                      | 3/0 |
| 6  |                                                |                                                  |                   |                   |   |                                                                                                                                         |                                                                                                                                  |                                                                                                                                   |                                           |     |
| 7  |                                                |                                                  |                   |                   |   |                                                                                                                                         |                                                                                                                                  |                                                                                                                                   |                                           |     |
| 8  |                                                |                                                  |                   |                   |   |                                                                                                                                         |                                                                                                                                  |                                                                                                                                   |                                           |     |
| 9  |                                                |                                                  |                   |                   |   |                                                                                                                                         |                                                                                                                                  |                                                                                                                                   |                                           |     |
| 10 |                                                |                                                  |                   |                   |   |                                                                                                                                         |                                                                                                                                  |                                                                                                                                   |                                           |     |
| 11 | Schneider et al. 2004 <sup>33</sup>            | Cross-sectional analysis study, 554 patients, US | Primary care      | HIV               | P | Physician-patient relationship (Survey)                                                                                                 | Adherence (Survey)                                                                                                               | Adherence to antiretroviral therapy                                                                                               | None                                      | 1/0 |
| 12 |                                                |                                                  |                   |                   |   |                                                                                                                                         |                                                                                                                                  |                                                                                                                                   |                                           |     |
| 13 |                                                |                                                  |                   |                   |   |                                                                                                                                         |                                                                                                                                  |                                                                                                                                   |                                           |     |
| 14 |                                                |                                                  |                   |                   |   |                                                                                                                                         |                                                                                                                                  |                                                                                                                                   |                                           |     |
| 15 | Schoenthaler et al. 2008 <sup>34</sup>         | Cross-sectional study, 439 patients, US          | Primary care      | Hypertension      | P | Patients' perceptions of providers' communication (Survey)                                                                              | Medication adherence (Morisky self-report measure)                                                                               | Medication adherence                                                                                                              | None                                      | 1/0 |
| 16 |                                                |                                                  |                   |                   |   |                                                                                                                                         |                                                                                                                                  |                                                                                                                                   |                                           |     |
| 17 |                                                |                                                  |                   |                   |   |                                                                                                                                         |                                                                                                                                  |                                                                                                                                   |                                           |     |
| 18 |                                                |                                                  |                   |                   |   |                                                                                                                                         |                                                                                                                                  |                                                                                                                                   |                                           |     |
| 19 | Slatore et al. 2010 <sup>64</sup>              | Cross sectional study, 342 patients, US          | Range of settings | COPD              | P | Patient-clinician communication (Quality of communication questionnaire (QOC))                                                          | Self-reported breathing problem confidence, and general self-rated health (Survey)                                               | Confidence in dealing with breathing problems                                                                                     | Self-rated health                         | 1/1 |
| 20 |                                                |                                                  |                   |                   |   |                                                                                                                                         |                                                                                                                                  |                                                                                                                                   |                                           |     |
| 21 |                                                |                                                  |                   |                   |   |                                                                                                                                         |                                                                                                                                  |                                                                                                                                   |                                           |     |
| 22 |                                                |                                                  |                   |                   |   |                                                                                                                                         |                                                                                                                                  |                                                                                                                                   |                                           |     |
| 23 | Lee & Lin 2009 <sup>65</sup>                   | Cohort study, 480 patients, Taiwan               | Range of settings | Type 2 diabetes   | P | Trust in physicians (Survey)                                                                                                            | Self-efficacy, adherence, health outcomes (Multidimensional Diabetes Questionnaire and 12-Item Short-Form Health Survey (SF-12)) | Physical HRQoL, mental HRQoL, body mass index HbA1c, triglycerides, complications, self-efficacy, outcome expectations, adherence | None                                      | 9/0 |
| 24 |                                                |                                                  |                   |                   |   |                                                                                                                                         |                                                                                                                                  |                                                                                                                                   |                                           |     |
| 25 |                                                |                                                  |                   |                   |   |                                                                                                                                         |                                                                                                                                  |                                                                                                                                   |                                           |     |
| 26 |                                                |                                                  |                   |                   |   |                                                                                                                                         |                                                                                                                                  |                                                                                                                                   |                                           |     |
| 27 |                                                |                                                  |                   |                   |   |                                                                                                                                         |                                                                                                                                  |                                                                                                                                   |                                           |     |
| 28 |                                                |                                                  |                   |                   |   |                                                                                                                                         |                                                                                                                                  |                                                                                                                                   |                                           |     |
| 29 | Heisler et al. 2002 <sup>35</sup>              | Survey, 1314 patients, US                        | primary care      | Diabetes          | P | Physician communication, physician interaction styles, participatory decision making (Questionnaire)                                    | Disease management (Surveys and national databases)                                                                              | Overall self-management, diabetes diet, medication compliance, exercise, blood glucose monitoring, foot care.                     | Exercise                                  | 6/1 |
| 30 |                                                |                                                  |                   |                   |   |                                                                                                                                         |                                                                                                                                  |                                                                                                                                   |                                           |     |
| 31 |                                                |                                                  |                   |                   |   |                                                                                                                                         |                                                                                                                                  |                                                                                                                                   |                                           |     |
| 32 |                                                |                                                  |                   |                   |   |                                                                                                                                         |                                                                                                                                  |                                                                                                                                   |                                           |     |
| 33 | Lee & Lin 2010 <sup>66</sup>                   | Cohort study, 614 patients, Taiwan               | Range of settings | Type 2 diabetes   | P | Patients' perceptions of support, autonomy, trust, satisfaction (Health Care Climate Questionnaire and Autonomy Preference Index (API)) | Glycosylated hemoglobin (HbA1C) (medical records) Physical and mental health-related quality of life (HRQoL) (SF-12)             | Physical HRQoL, mental HRQoL                                                                                                      | Information preference interaction, HbA1C | 2/2 |
| 34 |                                                |                                                  |                   |                   |   |                                                                                                                                         |                                                                                                                                  |                                                                                                                                   |                                           |     |
| 35 |                                                |                                                  |                   |                   |   |                                                                                                                                         |                                                                                                                                  |                                                                                                                                   |                                           |     |
| 36 |                                                |                                                  |                   |                   |   |                                                                                                                                         |                                                                                                                                  |                                                                                                                                   |                                           |     |
| 37 |                                                |                                                  |                   |                   |   |                                                                                                                                         |                                                                                                                                  |                                                                                                                                   |                                           |     |
| 38 |                                                |                                                  |                   |                   |   |                                                                                                                                         |                                                                                                                                  |                                                                                                                                   |                                           |     |
| 39 |                                                |                                                  |                   |                   |   |                                                                                                                                         |                                                                                                                                  |                                                                                                                                   |                                           |     |
| 40 |                                                |                                                  |                   |                   |   |                                                                                                                                         |                                                                                                                                  |                                                                                                                                   |                                           |     |
| 41 |                                                |                                                  |                   |                   |   |                                                                                                                                         |                                                                                                                                  |                                                                                                                                   |                                           |     |
| 42 |                                                |                                                  |                   |                   |   |                                                                                                                                         |                                                                                                                                  |                                                                                                                                   |                                           |     |
| 43 |                                                |                                                  |                   |                   |   |                                                                                                                                         |                                                                                                                                  |                                                                                                                                   |                                           |     |
| 44 |                                                |                                                  |                   |                   |   |                                                                                                                                         |                                                                                                                                  |                                                                                                                                   |                                           |     |
| 45 |                                                |                                                  |                   |                   |   |                                                                                                                                         |                                                                                                                                  |                                                                                                                                   |                                           |     |
| 46 |                                                |                                                  |                   |                   |   |                                                                                                                                         |                                                                                                                                  |                                                                                                                                   |                                           |     |
| 47 |                                                |                                                  |                   |                   |   |                                                                                                                                         |                                                                                                                                  |                                                                                                                                   |                                           |     |
| 48 |                                                |                                                  |                   |                   |   |                                                                                                                                         |                                                                                                                                  |                                                                                                                                   |                                           |     |
| 49 |                                                |                                                  |                   |                   |   |                                                                                                                                         |                                                                                                                                  |                                                                                                                                   |                                           |     |

|                                      |                                                  |                                     |                            |   |                                                                                                       |                                                                                                                                                    |                                                                                                                     |                                                                                                                                                                                                                                                                                   |      |
|--------------------------------------|--------------------------------------------------|-------------------------------------|----------------------------|---|-------------------------------------------------------------------------------------------------------|----------------------------------------------------------------------------------------------------------------------------------------------------|---------------------------------------------------------------------------------------------------------------------|-----------------------------------------------------------------------------------------------------------------------------------------------------------------------------------------------------------------------------------------------------------------------------------|------|
| Kennedy A. et al. 2003 <sup>67</sup> | Randomised control trial, 700 patients, UK       | Hospital                            | Inflammatory bowel Disease | P | Patient centered-care (Interviews)                                                                    | Resource use, self-rated physical and mental health, enablement (Patient diaries, questionnaires, medical records)                                 | Ability to cope with condition, symptom relapses, hospital visits, appointments made                                | Physical functioning, role limitations, social functioning, mental health, energy/vitality, pain, general health perception, anxiety, number of relapses, number of medically-defined relapses, average relapse duration, frequency of GP visits, delay before starting treatment | 4/13 |
| Stewart et al. 2000 <sup>42</sup>    | Observational Cohort study, 315 patients, Canada | Primary care                        | General                    | P | Patient-centred communication (Assessment of audiotape and Patient-Centered Communication Score tool) | Discomfort (VAS) symptom severity (Visual Analogue Scale), Health Status (Short Form-36 SF-36) Quality of care provision (Chart review by doctors) | Symptom discomfort & concern, self-reported health, diagnostic tests, referrals, and visits to the family physician | None                                                                                                                                                                                                                                                                              | 5/2  |
| Kinnersley et al. 1999 <sup>68</sup> | Observational Study, 143 patients, UK            | Primary care                        | Varied                     | P | Patient-centredness (Assessment of audiotape and questionnaires)                                      | Symptom resolution, resolution of concerns, functional health status (Questionnaire)                                                               | None                                                                                                                | Resolution of symptoms, resolution of concerns, functional health status                                                                                                                                                                                                          | 0/3  |
| Solberg et al. 2008 <sup>51</sup>    | Survey, 3109 patients, US                        | Primary care - multispecialty group | Varied                     | P | Patient experience of errors (Survey)                                                                 | Review of errors (Chart audits and physician reviewer judgements)                                                                                  | None                                                                                                                | None                                                                                                                                                                                                                                                                              | 1/0  |

|                                    |                                          |          |                                                                                              |   |                                                                                                                                                 |                                                                                                                                                              |                                                                                                                                                                                           |                                    |      |
|------------------------------------|------------------------------------------|----------|----------------------------------------------------------------------------------------------|---|-------------------------------------------------------------------------------------------------------------------------------------------------|--------------------------------------------------------------------------------------------------------------------------------------------------------------|-------------------------------------------------------------------------------------------------------------------------------------------------------------------------------------------|------------------------------------|------|
| Isaac et al. 2010 <sup>46</sup>    | Cross-sectional study, 927 hospitals, US | Hospital | Acute myocardial infarction, congestive heart failure, pneumonia complications from surgery. | O | General patient experiences (Hospital Consumer Assessment of Healthcare Providers and Systems survey (HCAHPS))                                  | Processes of care (Health Quality Alliance (HQA) database) and Patient Safety Indicators                                                                     | Decubitus ulcer rates, infections, processes of care for pneumonia, CHF and myocardial infarctions, surgical composites, hemorrhage, respiratory failure, DVT, pulmonary embolism, sepsis | Failure to rescue                  | 11/1 |
| Glickman et al. 2010 <sup>27</sup> | Cohort Study, 3562 patients, US          | Hospital | Acute myocardial infarction                                                                  | P | Patient satisfaction (Press-Ganey survey)                                                                                                       | Adherence to practice guidelines, outcomes (CRUSADE quality improvement registry).                                                                           | Inpatient mortality, composite clinical measures, AMI survival                                                                                                                            | None                               | 3/0  |
| Fremont et al. 2001 <sup>69</sup>  | Survey, 1346 patients, US                | Hospital | Cardiac                                                                                      | P | Patient centred care (Picker survey)                                                                                                            | Processes of care, functional health status, cardiac symptoms (Medical Outcomes Study questionnaire, London School of Hygiene measures for cardiac symptoms) | Overall health, chest pain, patient reported general physical and mental health status                                                                                                    | Mental health, shortness of breath | 5/2  |
| Riley et al. 2007 <sup>70</sup>    | Survey, 506 patients, Canada             | Hospital | Cardiac care - acute coronary                                                                | P | Continuity of care (The Heart Continuity of Care Questionnaire, Medical Outcome Study Social Support Survey, Illness Perception Questionnaire ) | Participation in cardiac rehabilitation, perception of illness, functional capacity (Duke Activity Status Index (DASI))                                      | Cardiac rehabilitation participation, perceptions of illness consequences                                                                                                                 | None                               | 2/0  |
| Weingart et al. 2005 <sup>49</sup> | Cohort study, 228 patients, US           | Hospital | Varied                                                                                       | P | Patient experience of adverse events (Interviews)                                                                                               | Adverse events (Medical records and patient interviews)                                                                                                      | Adverse events                                                                                                                                                                            | None                               | 1/0  |
| Weissman et al. 2008 <sup>50</sup> | Survey, 998 patients, US                 | Hospital | Varied                                                                                       | P | Patient experience of adverse events (Interviews)                                                                                               | Adverse events (Medical records)                                                                                                                             | Adverse events                                                                                                                                                                            | None                               | 1/0  |

Table 7: Systematic reviews

1  
2  
3  
4  
5  
6  
7  
8  
9  
10  
11  
12  
13  
14  
15  
16  
17  
18  
19  
20  
21  
22  
23  
24  
25  
26  
27  
28  
29  
30  
31  
32  
33  
34  
35  
36  
37  
38  
39  
40  
41  
42  
43  
44  
45  
46  
47  
48  
49

| Authors                             | Timespan & studies meeting inclusion criteria | Health care setting | Disease areas covered                                                                                   | Unit of analysis | Patient experience focus (and measurement methods)                                        | Safety & effectiveness measure - association demonstrated -                                                                                                                                                                                                                                                                      | Safety & effectiveness measure - association NOT demonstrated                                                                                                              | Assoc found vs not found |
|-------------------------------------|-----------------------------------------------|---------------------|---------------------------------------------------------------------------------------------------------|------------------|-------------------------------------------------------------------------------------------|----------------------------------------------------------------------------------------------------------------------------------------------------------------------------------------------------------------------------------------------------------------------------------------------------------------------------------|----------------------------------------------------------------------------------------------------------------------------------------------------------------------------|--------------------------|
| Blasi et al. 2001 <sup>71</sup>     | 1974-1998, 4 out of 25                        | Range of settings   | Asthma, hypertension, cancer, insomnia, menopause, obesity, tonsillitis                                 | P                | Provider behaviour and communication (Grading of consultations)                           | Health status, symptom improvement, treatment effectiveness, fear of injection, anxiety, ratings of pain, number of doctor visits, pain, speed of recovery                                                                                                                                                                       | Comfort, recovery time, return visits                                                                                                                                      | 9/3                      |
| Drotar 2009 <sup>29</sup>           | 1998-2008, 4 out of 22                        | Range of settings   | Asthma, cystic fibrosis, diabetes, epilepsy, inflammatory bowel disease, juvenile rheumatoid arthritis  | P                | Physician and staff behaviour (Surveys, interviews, medical records)                      | Treatment adherence, compliance, office visits, phone calls, hospitalizations                                                                                                                                                                                                                                                    | Medication adherence                                                                                                                                                       | 5/1                      |
| Hall et al. 2010 <sup>72</sup>      | 1990-2009, 10 out of 14                       | Range of settings   | Brain injury, musculoskeletal conditions, cardiac conditions, trauma, back, neck and shoulder pain      | P                | Therapist-patient relationship, therapeutic alliance (Surveys, audio/video taped session) | Adherence, employment status, physical training, therapeutic success, perceived effect of treatment, pain, physical function, depression, general health status, attendance, floor-bench lifts, global assessment scores, ability to perform ADLs, mobility                                                                      | Weekly physical training, disability, productivity, depression, functional status, adherence                                                                               | 18/6                     |
| Stevenson et al. 2004 <sup>73</sup> | 1991-2000, 7 out of 134                       | Range of settings   | Hypertension, asthma, chronic obstructive pulmonary disorder, ovarian cancer, epilepsy, hyperlipidaemia | P                | Doctor-patient communication (Surveys)                                                    | Self-reported adherence, blood pressure control, GP practice visits, hospitalizations, emergency room visits for children with asthma, quality of life for COPD patients, oral contraceptive adherence, adherence to anti-epileptic drugs, pain control following gynaecological surgery, adherence to medication for depression | Length of visits to doctor for asthma patients, health status and use of health care services for epilepsy patients, adherence to Niacin and bile acid sequestrant therapy | 9/5                      |

1  
2  
3  
4  
5  
6  
7  
8  
9  
10  
11  
12  
13  
14  
15  
16  
17  
18  
19  
20  
21  
22  
23  
24  
25  
26  
27  
28  
29  
30  
31  
32  
33  
34  
35  
36  
37  
38  
39  
40  
41  
42  
43  
44  
45  
46  
47  
48  
49

|                                         |                          |                   |                            |   |                                                                                                                                       |                                                                                                                                                                                                                                                                                                                                                                                                                                                                                                                                                                     |                                                                                                                                                                                                                                                                                                                                                                                                                  |       |
|-----------------------------------------|--------------------------|-------------------|----------------------------|---|---------------------------------------------------------------------------------------------------------------------------------------|---------------------------------------------------------------------------------------------------------------------------------------------------------------------------------------------------------------------------------------------------------------------------------------------------------------------------------------------------------------------------------------------------------------------------------------------------------------------------------------------------------------------------------------------------------------------|------------------------------------------------------------------------------------------------------------------------------------------------------------------------------------------------------------------------------------------------------------------------------------------------------------------------------------------------------------------------------------------------------------------|-------|
| Saultz & Lochner 2005 <sup>44</sup>     | 1967-2002, 41 studies    | Range of settings | Varied                     | P | Continuity of care -ongoing relationship between individual doctor &patient (Surveys, continuity of care index)                       | Hospitalization rate, hospital readmission, length of stay, influenza immunization, preventive care, antibiotic compliance, ICU days, Neonatal morbidity, Apgar score, Birth weight, Rates and timeliness of childhood immunizations, health-related quality of life, recommended diabetes care measures, glucose control, PAP tests, mammogram rate, breast exams, surgical operation rates, hypertension control, presence of depression, relationship problems, adverse events in hospitalized patients, degree of patient enablement, rheumatic fever incidence | Diabetes (HbA1C, lipid control, blood pressure control, presence of diabetic complications), blood glucose control, functional ability of elderly patients, compliance with antibiotic therapy, well-child visits, blood pressure checks in women, pregnancy complications, newborn mortality, immunization rates, NICU admissions, Apgar scores, caesarean rate, length of labor, indications for tonsillectomy | 51/30 |
| Hall & Roter & Katz 1988 <sup>74</sup>  | Meta-analysis 41 studies | Range of settings | Varied                     | P | Clinician-patient communication (Surveys, interviews, observations, assessment of video or audio)                                     | Compliance (with 4 variables of PE), recall/understanding (with 4 variables of PE)                                                                                                                                                                                                                                                                                                                                                                                                                                                                                  | Compliance (with 1 variable of PE), recall/understanding (with 1 variable of PE)                                                                                                                                                                                                                                                                                                                                 | 8/2   |
| Jackson, C. et al. 2010 <sup>40</sup>   | 1984-2008, 3 out of 17   | Range of settings | Inflammatory bowel disease | P | Trust in physician, Patient-physician agreement, adequacy information (Surveys)                                                       | Adherence to treatment                                                                                                                                                                                                                                                                                                                                                                                                                                                                                                                                              | Compliance                                                                                                                                                                                                                                                                                                                                                                                                       | 2/1   |
| Sans-Coralles et al. 2006 <sup>43</sup> | 1984-2005, 9 out of 20   | Primary care      | No specific disease focus  | P | Continuity of care, coordination of care, consultation time, doctor-patient relationship (Validated tools in these different domains) | Hospital admissions, length of stay, compliance, recovery from discomfort, emotional health, diagnostic tests, referrals, quality of care for asthma, diabetes and angina, symptom burden, receipt of preventive services                                                                                                                                                                                                                                                                                                                                           | Enablement                                                                                                                                                                                                                                                                                                                                                                                                       | 13/1  |
| Hsiao & Boulton 2008 <sup>45</sup>      | 1984-2003, 3 out of 14   | Primary care      | No specific disease focus  | P | Continuity with physician (Surveys, interviews, medical records, chart reviews)                                                       | Hospitalisations for all conditions and ambulatory care-sensitive conditions, odds of hospitalisation(2), health care costs(2), emergency department visits, emergent hospital admissions(2), length of stay, diabetes recognition, mental health(2), pain, perception of health, well-being, BMI, triglyceride concentrations, recovery, clinical outcomes, self-reported health                                                                                                                                                                                   | Acute ambulatory care-sensitive conditions, mobility, pain, emotion, activities of daily living, smoking, BMI, hypertension, hypercholesterolemia, self-reported health, glycemic control, diabetes control, frequency of hypoglycemic reactions, blood sugar, weight                                                                                                                                            | 21/15 |

1  
2  
3  
4  
5  
6  
7  
8  
9  
10  
11  
12  
13  
14  
15  
16  
17  
18  
19  
20  
21  
22  
23  
24  
25  
26  
27  
28  
29  
30  
31  
32  
33  
34  
35  
36  
37  
38  
39  
40  
41  
42  
43  
44  
45  
46  
47  
48  
49

|                                         |                                                   |                   |                                                                                                                                                                              |   |                                                                                        |                                                                                                                                                                                                                                                                                                                                                                                                                                                                                                                      |                                     |       |
|-----------------------------------------|---------------------------------------------------|-------------------|------------------------------------------------------------------------------------------------------------------------------------------------------------------------------|---|----------------------------------------------------------------------------------------|----------------------------------------------------------------------------------------------------------------------------------------------------------------------------------------------------------------------------------------------------------------------------------------------------------------------------------------------------------------------------------------------------------------------------------------------------------------------------------------------------------------------|-------------------------------------|-------|
| Arbuthnott et al. 2009 <sup>30</sup>    | Meta analysis, 1955-2007, All 48 studies included | Range of settings | Asthma, bacterial infection, fibromyalgia, diabetes, renal disease, hypertension, congestive heart failure, inflammatory bowel disease, breast cancer, HIV, and tuberculosis | P | Physician-patient collaboration (Observation, surveys)                                 | Medication adherence, behavioural adherence                                                                                                                                                                                                                                                                                                                                                                                                                                                                          | Appointment adherence               | 2/1   |
| Stewart 1995 <sup>75</sup>              | 1983-1993, 21 studies                             | Range of settings | Peptic ulcers, breast cancer, diabetes, hypertension, headache, coronary artery disease, gingivitis, tuberculosis, prostate cancer                                           | P | Physician-patient communication (Surveys, evaluation of audio- or videotape recording) | Peptic ulcer physical limitation, blood glucose levels, blood pressure, headache resolution, physician evaluation of symptom resolution for coronary artery disease, gingivitis and tuberculosis, anxiety level in gynecological care, radiation therapy, breast cancer care, functional status following radiation therapy for prostate cancer, anxiety after radiation therapy, pain levels and hospital length of stay after intra-abdominal surgery, physical and psychological complaints in breast cancer care | Details not included                | 16/5  |
| Zolnierok & DiMatteo 2009 <sup>28</sup> | Meta analysis 1949-2008, 127 studies              | Range of settings | No specific disease focus                                                                                                                                                    | P | Physician-patient communication (Observation, surveys)                                 | Adherence to treatment recommended by clinician                                                                                                                                                                                                                                                                                                                                                                                                                                                                      | Adherence (2 observational studies) | 125/2 |
| Beck et al. 2002 <sup>76</sup>          | 1975-2000, 5 out of 14                            | Primary care      | No specific disease focus                                                                                                                                                    | P | Physician-patient communication (Observation, evaluation of audio and video tapes)     | Compliance with doctors' advice, blood pressure, pill count                                                                                                                                                                                                                                                                                                                                                                                                                                                          | None                                | 10/0  |
| Cabana & Lee 2004 <sup>21</sup>         | 1966-2002, 7 out of 18                            | Range of settings | Rheumatoid arthritis, epilepsy, breast cancer, cervical cancer, diabetes                                                                                                     | P | Continuity of care (Validated measures of continuity e.g. SCOC)                        | Hospitalizations, length of stay, emergency department visits, intensive care days, preventive medicine visits, drug or alcohol abuse, outpatient attendance, glucose control for adults with diabetes                                                                                                                                                                                                                                                                                                               | None                                | 18/5  |
| Richards et al. 2006 <sup>77</sup>      | 1997-2002, 2 out of 33                            | Range of settings | Psoriasis                                                                                                                                                                    | P | Patient's perception of care, satisfaction, interpersonal skills (Surveys, interviews) | Treatment adherence, medication use                                                                                                                                                                                                                                                                                                                                                                                                                                                                                  | None                                | 2/0   |

## References

1. Institute of Medicine. *Crossing the Quality Chasm: a new health system for the 21st century*. Washington DC: National Academy Press, 2001.
2. Black N., Jenkinson C. Measuring patients experiences and outcomes. *BMJ* 2009;339.
3. Department of Health. *Liberating the NHS: Transparency in outcomes – a framework for the NHS*: Department of Health, 2010.
4. Darzi A. *High Quality Care For All – NHS Next Stage Review Final Report*: Department of Health 2008.
5. Department of Health. *Using the Commissioning for Quality and Innovation (CQUIN) payment framework*, 2008.
6. Berwick DM. What "Patient-Centered" Should Mean: Confessions Of An Extremist. *Health Affairs* 2009;28(4):w555-w65.
7. Street RL, Makoul G, Arora NK, Epstein RM. How does communication heal? Pathways linking clinician-patient communication to health outcomes. *Patient education and counseling* 2009;74(3):295-301.
8. Thom DH, Hall MA, Pawlson LG. Measuring Patients' Trust In Physicians When Assessing Quality Of Care. *Health Affairs* 2004;23(4):124-32.
9. Vincent CA, Coulter A. Patient safety: what about the patient? *Quality and Safety in Health Care* 2002;11(1):76-80.
10. Coulter A. *Engaging patients in healthcare*. Maidenhead Open University Press 2011.
11. Rathert C, Huddleston N, Pak Y. Acute care patients discuss the patient role in patient safety. *Health Care Management Review*;36(2):134-44  
10.1097/HMR.0b013e318208cd31.
12. Picker Institute. *Patient experience surveys: the rationale* Picker Institute Europe, 2008.
13. NICE. *Patient experience in adult NHS services: improving the experience of care for people using adult NHS services*: NICE, 2011.
14. Iles V., Vaughan Smith J. *Working in health care could be one of the most satisfying jobs in the world - why doesn't it feel like that?* , 2009.
15. López L., Weissman JS., Schneider EC., Weingart SN., Cohen AP., AM. E. Disclosure of hospital adverse events and its association with patients' ratings of the quality of care. *Arch Intern Med* 2009;169(20 ).
16. Safran DG., Taira DA., Rogers WH., Kosinski M., Ware JE., Tarlov AR. Linking primary care performance to outcomes of care. *Journal of Family Practice* 1998;47:213-20.
17. Robert Wood Johnson Foundation. *Good for Health, Good for Business: The Case for Measuring Patient Experience of Care: The Center for Health Care Quality at the George Washington University Medical Center*
18. Greenhalgh T., Peacock R. Effectiveness and efficiency of search methods in systematic reviews of complex evidence: audit of primary sources. *BMJ* 2005;331(7524):1064-65.
19. Fuertes J, Boylan L, Fontanella J. Behavioral Indices in Medical Care Outcome: The Working Alliance, Adherence, and Related Factors. *Journal of General Internal Medicine* 2009;24(1):80-85.
20. Raiz LR, Kilty KM, Henry ML, Ferguson RM. Medication Compliance Following Renal Transplantation. *Transplantation* 1999;68(1):51-55.
21. Cabana M., Jee S. Does continuity of care improve patient outcomes? *The Journal of Family Practice* 2004;53(12).
22. Plomondon M, Magid D, Masoudi F, Jones P, Barry L, Havranek E, et al. Association Between Angina and Treatment Satisfaction after Myocardial Infarction. *Journal of General Internal Medicine* 2008;23(1):1-6.



23. Jha AK, Orav EJ, Zheng J, Epstein AM. Patients' Perception of Hospital Care in the United States. *New England Journal of Medicine* 2008;359(18):1921-31.
24. Sequist et al. Quality Monitoring of Physicians: Linking Patients' Experiences of Care to Clinical Quality and Outcomes. *Journal of General Internal Medicine* 2008;23(11).
25. Kaplan SH, Greenfield S, Ware JE. Assessing the effects of physician-patient interactions on the outcomes of chronic disease. *Medical Care* 1989;27(3, Suppl):S110-S27.
26. Meterko M, Wright S, Lin H, Lowy E, Cleary PD. Mortality among Patients with Acute Myocardial Infarction: The Influences of Patient-Centered Care and Evidence-Based Medicine. *Health Services Research* 2010;45(5p1):1188-204.
27. Glickman SW, Boulding W, Manary M, Staelin R, Roe MT, Wolosin RJ, et al. Patient Satisfaction and Its Relationship With Clinical Quality and Inpatient Mortality in Acute Myocardial Infarction. *Circulation: Cardiovascular Quality and Outcomes*;3(2):188-95.
28. Zolnierok H. KB, DiMatteo MR. Physician Communication and Patient Adherence to Treatment: A Meta-Analysis. *Medical Care* 2009;47(8):826-34  
10.1097/MLR.0b013e31819a5acc.
29. Drotar D. Physician Behavior in the Care of Pediatric Chronic Illness: Association With Health Outcomes and Treatment Adherence. *Journal of Developmental & Behavioral Pediatrics* 2009;30(3):246-54 10.1097/DBP.0b013e3181a7ed42.
30. Arbutnott A, Sharpe D. The effect of physician-patient collaboration on patient adherence in non-psychiatric medicine. *Patient education and counseling* 2009;77(1):60-67.
31. Lewis ET, Combs A, Trafton JA. Reasons for Under-Use of Prescribed Opioid Medications by Patients in Pain. *Pain Medicine* 2010;11(6):861-71.
32. Kahn KL, Schneider EC, Malin JL, Adams JL, Epstein AM. Patient Centered Experiences in Breast Cancer: Predicting Long-Term Adherence to Tamoxifen Use. *Medical Care* 2007;45(5):431-39 10.1097/01.mlr.0000257193.10760.7f.
33. Schneider EC, Zaslavsky AM, Landon BE, Lied TR, Sheingold S, Cleary PD. National Quality Monitoring of Medicare Health Plans: The Relationship Between Enrollees' Reports and the Quality of Clinical Care. *Medical Care* 2001;39(12):1313-25.
34. Schoenthaler A, Chaplin WF, Allegrante JP, Fernandez S, Diaz-Gloster M, Tobin JN, et al. Provider communication effects medication adherence in hypertensive African Americans. *Patient Education and Counseling* 2009;75(2):185-91.
35. Heisler M, Bouknight RR, Hayward RA, Smith DM, Kerr EA. The Relative Importance of Physician Communication, Participatory Decision Making, and Patient Understanding in Diabetes Self-management. *Journal of General Internal Medicine* 2002;17(4):243-52.
36. Haynes RB, Ackloo E, Sahota N, McDonald HP, X. Y. Interventions for enhancing medication adherence. *Cochrane Database Syst Rev* 2008.
37. Flocke SA, Stange KC, Zyzanski SJ. The Association of Attributes of Primary Care With the Delivery of Clinical Preventive Services. *Medical Care* 1998;36(8):AS21-AS30.
38. O'Malley AS, Sheppard VB, Schwartz M, Mandelblatt J. The role of trust in use of preventive services among low-income African-American women. *Preventive Medicine: An International Journal Devoted to Practice and Theory* 2004;38(6):777-85.
39. Carcaise-Edinboro P, Bradley CJ. Influence of Patient-Provider Communication on Colorectal Cancer Screening. *Medical Care* 2008;46(7):738-45  
10.1097/MLR.0b013e318178935a.

- 1
- 2
- 3 40. Jackson CA, Clatworthy J, Robinson A, Horne R. Factors Associated With Non-
- 4 Adherence to Oral Medication for Inflammatory Bowel Disease: A Systematic
- 5 Review. *Am J Gastroenterol* 2010;105(3):525-39.
- 6
- 7 41. Clark NM, Cabana MD, Nan B, Gong ZM, Shish KK, Birk NA, et al. The Clinician-
- 8 Patient Partnership Paradigm: Outcomes Associated With Physician Communication
- 9 Behavior. *Clinical Pediatrics* 2008;47(1):49-57.
- 10
- 11 42. Stewart M., Brown J., Donner A., McWhinney I., Oates J., Weston W., et al. The Impact
- 12 of Patient-Centered Care on Outcomes. *Journal of Family Practice* 2000;49(9).
- 13
- 14 43. Sans-Corrales M, Pujol-Ribera E, GenÃ©-Badia J, PasarÃ©n-Rua MI, Iglesias-PÃ©rez
- 15 Ba, Casajuana-Brunet J. Family medicine attributes related to satisfaction, health and
- 16 costs. *Family Practice* 2006;23(3):308-16.
- 17
- 18 44. Saultz JW, Lochner J. Interpersonal Continuity of Care and Care Outcomes: A Critical
- 19 Review. *The Annals of Family Medicine* 2005;3(2):159-66.
- 20
- 21 45. Hsiao C-J, Boulton C. Effects of Quality on Outcomes in Primary Care: A Review of the
- 22 Literature. *American Journal of Medical Quality* 2008;23(4):302-10.
- 23
- 24 46. Isaac T, Zaslavsky AM, Cleary PD, Landon BE. The Relationship between Patients'
- 25 Perception of Care and Measures of Hospital Quality and Safety. *Health Services*
- 26 *Research* 2010;45(4):1024-40.
- 27
- 28 47. Rao M, Clarke A., Sanderson C., Hammersley R. Patients' Own Assessments of Quality
- 29 of Primary Care Compared with Objective Records Based Measures of Technical
- 30 Quality of Care: Cross Sectional Study. *BMJ* 2006;333(7797).
- 31
- 32 48. Chang JT, Hays RD, Shekelle PG, MacLean CH, Solomon DH, Reuben DB, et al.
- 33 Patients' global ratings of their health care are not associated with the technical quality
- 34 of their care.
- 35 *Ann Intern Med* 2006;145(8):635-6.
- 36
- 37 49. Weingart SN, Pagovich O, Sands DZ, Li JM, Aronson MD, Davis RB, et al. What Can
- 38 Hospitalized Patients Tell Us About Adverse Events? Learning from Patient-Reported
- 39 Incidents. *Journal of General Internal Medicine* 2005;20(9):830-36.
- 40
- 41 50. Weissman JS, Schneider EC, Weingart SN, Epstein AM, David-Kasdan J, Feibelmann S,
- 42 et al. Comparing Patient-Reported Hospital Adverse Events with Medical Record
- 43 Review: Do Patients Know Something That Hospitals Do Not? *Annals of Internal*
- 44 *Medicine* 2008;149(2):100-08.
- 45
- 46 51. Solberg LI, Asche SE, Averbach BM, Hayek AM, Schmitt KG, Lindquist TC, et al. Can
- 47 Patient Safety Be Measured by Surveys of Patient Experiences? *Joint Commission*
- 48 *Journal on Quality and Patient Safety* 2008;34(5):266-74.
- 49
- 50 52. O'Connor AM, Bennett CL, Stacey D, Barry M, Col NF, Eden KB, et al. Decision aids
- 51 for people facing health treatment or screening decisions. *Cochrane database of*
- 52 *systematic reviews (Online)* 2009(3):CD001431.
- 53
- 54 53. Mumford E, Schlesinger HJ, Glass GV. The effect of psychological intervention on
- 55 recovery from surgery and heart attacks: an analysis of the literature. *American*
- 56 *Journal of Public Health* 1982;72(2):141-51.
- 57
- 58 54. Begg C., Berlin J., N. J. . Publication Bias: A Problem in Interpreting Medical Data
- 59 *Journal of the Royal Statistical Society. Series A (Statistics in Society)* 1988;151(3).
- 60
- 55 55. Burgers JS, Voerman GE, Grol R, Faber MJ, Schneider EC. Quality and Coordination of
- Care for Patients With Multiple Conditions: Results From an International Survey of
- Patient Experience. *Evaluation & the Health Professions* 2010;33(3):343-64.
- 56 56. Vincent C. Understanding and Responding to Adverse Events. *New England Journal of*
- Medicine* 2003;348(11):1051-56.
- 57 57. Agoritsas T, Bovier PA, Perneger TV. Patient Reports of Undesirable Events During
- Hospitalization. *Journal of General Internal Medicine* 2005;20(10):922-28.

- 1  
2  
3 58. Jackson JL, Chamberlin J, Kroenke K. Predictors of patient satisfaction. *Social Science &*  
4 *Medicine* 2001;52(4).
- 5 59. Safran DG., Miller W., Beckman H. Organizational Dimensions of Relationship-centred  
6 care. *Journal of General Internal Medicine* 2005;21:S9-15.
- 7 60. Alamo MMo, Moral RR, PÁ©rula de Torres LA. Evaluation of a patient-centred  
8 approach in generalized musculoskeletal chronic pain/fibromyalgia patients in  
9 primary care. *Patient education and counseling* 2002;48(1):23-31.
- 10 61. Fan VS, Reiber GE, Diehr P, Burman M, McDonell MB, Fihn SD. Functional Status and  
11 Patient Satisfaction. *Journal of General Internal Medicine* 2005;20(5):452-59.
- 12 62. Little P., Everitt H., Williamson I., Warner G., Moore M., Gould C., et al. Observational  
13 study of effect of patient centredness and positive approach on outcomes of general  
14 practice consultations. *BMJ* 2001;323(7318):908-11.
- 15 63. Levinson W, Roter DL, Mullooly JP, Dull VT, Frankel RM. Physician-Patient  
16 Communication: The Relationship With Malpractice Claims Among Primary Care  
17 Physicians and Surgeons. *JAMA: The Journal of the American Medical Association*  
18 1997;277(7):553-59.
- 19 64. Slatore, Christopher G, Cecere, Laura M, Reinke, Lynn F, et al. *Patient-Clinician*  
20 *Communication: Associations With Important Health Outcomes Among Veterans*  
21 *With COPD*. Northbrook, IL, ETATS-UNIS: American College of Chest Physicians,  
22 2010.
- 23 65. Lee Y-Y, Lin JL. The effects of trust in physician on self-efficacy, adherence and  
24 diabetes outcomes. *Social Science & Medicine* 2009;68(6):1060-68.
- 25 66. Lee Y-Y, Lin JL. Do patient autonomy preferences matter? Linking patient-centered care  
26 to patient-physician relationships and health outcomes. *Social Science & Medicine*  
27 2010;71(10):1811-18.
- 28 67. Kennedy A, Nelson E, Reeves D, Richardson G, Roberts C, Robinson A, et al. A  
29 randomised controlled trial to assess the impact of a package comprising a patient-  
30 orientated, evidence-based self-help guidebook and patient-centred consultations on  
31 disease management and satisfaction in inflammatory bowel disease. *Health*  
32 *technology assessment (Winchester, England)* 2003;7(28):iii, 1-113.
- 33 68. Kinnersley P, Stott N, Peters TJ, Harvey I. The patient-centredness of consultations and  
34 outcome in primary care. *British Journal of General Practice* 1999;49(446):711-16.
- 35 69. Fremont A, Cleary P, Hargraves J, Rowe R, Jacobson N, Ayanian J. Patient-centered  
36 processes of care and long-term outcomes of myocardial infarction. *Journal of*  
37 *General Internal Medicine* 2001;16(12):800-08.
- 38 70. Riley DL, Stewart DE, Grace SL. Continuity of cardiac care: Cardiac rehabilitation  
39 participation and other correlates. *International Journal of Cardiology*  
40 2007;119(3):326-33.
- 41 71. Blasi ZD, Harkness E, Ernst E, Georgiou A, Kleijnen J. Influence of context effects on  
42 health outcomes: a systematic review. *The Lancet* 2001;357(9258):757-62.
- 43 72. Hall AM, Ferreira PH, Maher CG, Latimer J, Ferreira ML. The Influence of the  
44 Therapist-Patient Relationship on Treatment Outcome in Physical Rehabilitation: A  
45 Systematic Review. *Physical Therapy* 2010;90(8):1099-110.
- 46 73. Stevenson FA, Cox K, Britten N, Dundar Y. A systematic review of the research on  
47 communication between patients and health care professionals about medicines: the  
48 consequences for concordance. *Health Expectations* 2004;7(3):235-45.
- 49 74. Hall JA, Roter DL, Katz NR. Meta-analysis of correlates of provider behavior in medical  
50 encounters. *Medical Care* 1988;26(7):657-75.
- 51 75. Stewart MA. Effective physician-patient communication and health outcomes: a review.  
52 *Canadian Medical Association Journal* 1995;152(9):1423-33.
- 53  
54  
55  
56  
57  
58  
59  
60

- 1  
2  
3 76. Beck RS, Daughtridge R, Sloane PD. Physician-patient communication in the primary  
4 care office: a systematic review. *The Journal of the American Board of Family*  
5 *Practice* 2002;15(1):25-38.  
6  
7 77. Richards HL, Fortune DG, Griffiths CEM. Adherence to treatment in patients with  
8 psoriasis. *Journal of the European Academy of Dermatology and Venereology*  
9 2006;20(4):370-79.  
10  
11  
12  
13  
14  
15  
16  
17  
18  
19  
20  
21  
22  
23  
24  
25  
26  
27  
28  
29  
30  
31  
32  
33  
34  
35  
36  
37  
38  
39  
40  
41  
42  
43  
44  
45  
46  
47  
48  
49  
50  
51  
52  
53  
54  
55  
56  
57  
58  
59  
60

For peer review only

Chart 1: Disease areas covered

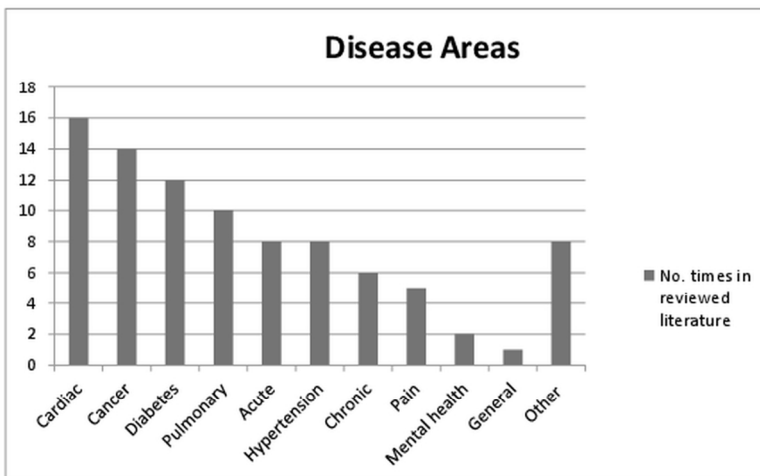

122x90mm (300 x 300 DPI)

ew only

1  
2  
3  
4  
5  
6  
7  
8  
9  
10  
11  
12  
13  
14  
15  
16  
17  
18  
19  
20  
21  
22  
23  
24  
25  
26  
27  
28  
29  
30  
31  
32  
33  
34  
35  
36  
37  
38  
39  
40  
41  
42  
43  
44  
45  
46  
47  
48  
49  
50  
51  
52  
53  
54  
55  
56  
57  
58  
59  
60

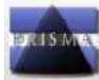

# PRISMA 2009 Checklist

| Section/topic                      | #  | Checklist item                                                                                                                                                                                                                                                                                              | Reported on page # |
|------------------------------------|----|-------------------------------------------------------------------------------------------------------------------------------------------------------------------------------------------------------------------------------------------------------------------------------------------------------------|--------------------|
| <b>TITLE</b>                       |    |                                                                                                                                                                                                                                                                                                             |                    |
| Title                              | 1  | Identify the report as a systematic review, meta-analysis, or both.                                                                                                                                                                                                                                         | 1                  |
| <b>ABSTRACT</b>                    |    |                                                                                                                                                                                                                                                                                                             |                    |
| Structured summary                 | 2  | Provide a structured summary including, as applicable: background; objectives; data sources; study eligibility criteria, participants, and interventions; study appraisal and synthesis methods; results; limitations; conclusions and implications of key findings; systematic review registration number. | 2                  |
| <b>INTRODUCTION</b>                |    |                                                                                                                                                                                                                                                                                                             |                    |
| Rationale                          | 3  | Describe the rationale for the review in the context of what is already known.                                                                                                                                                                                                                              | 4                  |
| Objectives                         | 4  | Provide an explicit statement of questions being addressed with reference to participants, interventions, comparisons, outcomes, and study design (PICOS).                                                                                                                                                  | 4                  |
| <b>METHODS</b>                     |    |                                                                                                                                                                                                                                                                                                             |                    |
| Protocol and registration          | 5  | Indicate if a review protocol exists, if and where it can be accessed (e.g., Web address), and, if available, provide registration information including registration number.                                                                                                                               | n/a                |
| Eligibility criteria               | 6  | Specify study characteristics (e.g., PICOS, length of follow-up) and report characteristics (e.g., years considered, language, publication status) used as criteria for eligibility, giving rationale.                                                                                                      | 5-6                |
| Information sources                | 7  | Describe all information sources (e.g., databases with dates of coverage, contact with study authors to identify additional studies) in the search and date last searched.                                                                                                                                  | 4-6                |
| Search                             | 8  | Present full electronic search strategy for at least one database, including any limits used, such that it could be repeated.                                                                                                                                                                               | 4-6                |
| Study selection                    | 9  | State the process for selecting studies (i.e., screening, eligibility, included in systematic review, and, if applicable, included in the meta-analysis).                                                                                                                                                   | 4-6                |
| Data collection process            | 10 | Describe method of data extraction from reports (e.g., piloted forms, independently, in duplicate) and any processes for obtaining and confirming data from investigators.                                                                                                                                  | 6                  |
| Data items                         | 11 | List and define all variables for which data were sought (e.g., PICOS, funding sources) and any assumptions and simplifications made.                                                                                                                                                                       | 4-6                |
| Risk of bias in individual studies | 12 | Describe methods used for assessing risk of bias of individual studies (including specification of whether this was done at the study or outcome level), and how this information is to be used in any data synthesis.                                                                                      | 6,12-19            |
| Summary measures                   | 13 | State the principal summary measures (e.g., risk ratio, difference in means).                                                                                                                                                                                                                               | n/a                |
| Synthesis of results               | 14 | Describe the methods of handling data and combining results of studies, if done, including measures of consistency (e.g., $I^2$ ) for each meta-analysis.                                                                                                                                                   | n/a                |



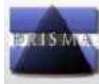

# PRISMA 2009 Checklist

| Section/topic                 | #  | Checklist item                                                                                                                                                                                           | Reported on page # |
|-------------------------------|----|----------------------------------------------------------------------------------------------------------------------------------------------------------------------------------------------------------|--------------------|
| Risk of bias across studies   | 15 | Specify any assessment of risk of bias that may affect the cumulative evidence (e.g., publication bias, selective reporting within studies).                                                             | 10                 |
| Additional analyses           | 16 | Describe methods of additional analyses (e.g., sensitivity or subgroup analyses, meta-regression), if done, indicating which were pre-specified.                                                         | n/a                |
| <b>RESULTS</b>                |    |                                                                                                                                                                                                          |                    |
| Study selection               | 17 | Give numbers of studies screened, assessed for eligibility, and included in the review, with reasons for exclusions at each stage, ideally with a flow diagram.                                          | 3-6                |
| Study characteristics         | 18 | For each study, present characteristics for which data were extracted (e.g., study size, PICOS, follow-up period) and provide the citations.                                                             | 12-19              |
| Risk of bias within studies   | 19 | Present data on risk of bias of each study and, if available, any outcome level assessment (see item 12).                                                                                                | 10                 |
| Results of individual studies | 20 | For all outcomes considered (benefits or harms), present, for each study: (a) simple summary data for each intervention group (b) effect estimates and confidence intervals, ideally with a forest plot. | 12-21              |
| Synthesis of results          | 21 | Present results of each meta-analysis done, including confidence intervals and measures of consistency.                                                                                                  | n/a                |
| Risk of bias across studies   | 22 | Present results of any assessment of risk of bias across studies (see Item 15).                                                                                                                          | 10                 |
| Additional analysis           | 23 | Give results of additional analyses, if done (e.g., sensitivity or subgroup analyses, meta-regression [see Item 16]).                                                                                    | n/a                |
| <b>DISCUSSION</b>             |    |                                                                                                                                                                                                          |                    |
| Summary of evidence           | 24 | Summarize the main findings including the strength of evidence for each main outcome; consider their relevance to key groups (e.g., healthcare providers, users, and policy makers).                     | 7-8                |
| Limitations                   | 25 | Discuss limitations at study and outcome level (e.g., risk of bias), and at review-level (e.g., incomplete retrieval of identified research, reporting bias).                                            | 10                 |
| Conclusions                   | 26 | Provide a general interpretation of the results in the context of other evidence, and implications for future research.                                                                                  | 10                 |
| <b>FUNDING</b>                |    |                                                                                                                                                                                                          |                    |
| Funding                       | 27 | Describe sources of funding for the systematic review and other support (e.g., supply of data); role of funders for the systematic review.                                                               | 1                  |

From: Moher D, Liberati A, Tetzlaff J, Altman DG, The PRISMA Group (2009). Preferred Reporting Items for Systematic Reviews and Meta-Analyses: The PRISMA Statement. PLoS Med 6(6): e1000097. doi:10.1371/journal.pmed1000097

For more information, visit: [www.prisma-statement.org](http://www.prisma-statement.org).



## PRISMA 2009 Flow Diagram

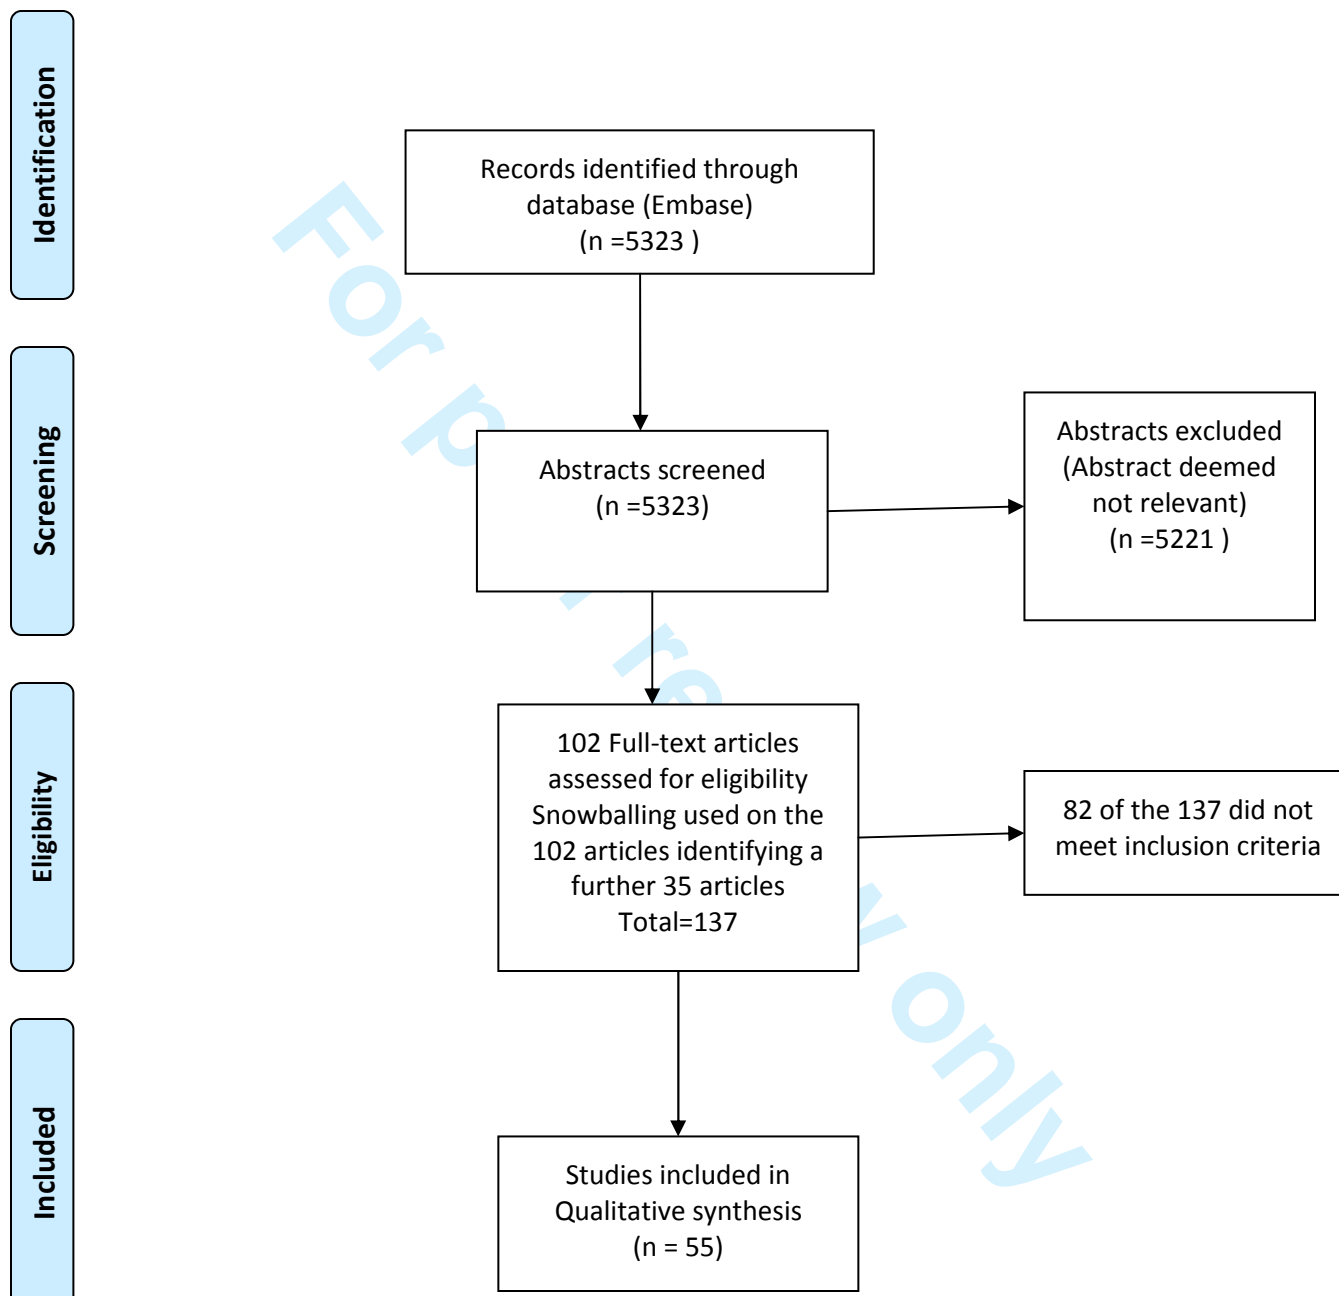

From: Moher D, Liberati A, Tetzlaff J, Altman DG, The PRISMA Group (2009). Preferred Reporting Items for Systematic Reviews and Meta-Analyses: The PRISMA Statement. PLoS Med 6(6): e1000097. doi:10.1371/journal.pmed1000097

For more information, visit [www.prisma-statement.org](http://www.prisma-statement.org).

For peer review only - <http://bmjopen.bmj.com/site/about/guidelines.xhtml>
